# Supplementary material for: Selection of Co-Belonging Ceramic Fragments from Archaeological Excavations and Their Location in Vase Bodies from Theroremanent Magnetization
Source: Preprints.org preprint supplement (doi:10.20944/preprints201905.0245.v1), 2019-05-20

**Supplementary files**

**Computation of magnetization in body fragments from vases 1-6**

Indicative detailed experimental results with the methodology reported in Sect. 7 are given (**tables 1-4**) using measurements of body fragments from **vase 6.**

For each of the remaining vases, 2 tables of measurements are presented. The first table containsmeasurements of the fragments’ thickness, L, of the distance, D, between the measurement position and the fragment edge in the common direction of the Mxz, Βxz and the sensor readings of Bi (i=xz,y), with the x-sensor aligned along the direction of Βxz.

The second table contains the sensor readings of Bi (i=x,y,z), with the x-sensor oriented in the grooves’ direction on the body fragments.

The above quantities and the relationships 4,5 are used for the calculation of magnetization components.

.

| **Vase 6** | | **A** | **Β** | **Γ** | **Δ** | **Ε** | **Ζ** | **Η** | **Θ** | **Ι** | **Κ** |
| --- | --- | --- | --- | --- | --- | --- | --- | --- | --- | --- | --- |
| **1** | **D** (±0.3) cm | 4.2 |  |  | 3.4 | 6.2 | 2.2 | 6.2 |  |  | 10.6 |
| **L** (±0.1) cm | 0.9 | 0.8 | 0.7 | 0.7 | 0.7 | 0.9 |
| **Bxz** (±1)nT | 32 | 6 | 6 | 29 | 38 | 37 |
| **By** (±1)nT | 4 | 17 | 14 | 7 | 3 | -3 |
| **B**(±1)nT | **32** | **18** | **15** | **30** | **38** | **37** |
| **θΒο** | **83±2** | **20±3** | **24±4** | **76±2** | **85±2** | **-85±2** |
| **2** | **D** (±0.3) cm | 2.4 | 14.8 | 10.7 | 1.2 | 6.3 | 4.8 | 3.2 | 2.1 | 3.4 | 2.5 |
| **L** (±0.1) cm | 1.6 | 1.6 | 1.7 | 1.9 | 1.5 | 1.6 | 1.8 | 1.8 | 1.9 | 1.9 |
| **Bxz** (±1)nT | 39 | 35 | 24 | 20 | 17 | 37 | 34-3 | 35 | 35 | 27 |
| **By** (±1)nT | 2 | 6 | 14 | 16 | 15 | 2 | 34 | -7 | -7 | -13 |
| **B**(±1)nT | **39** | **36** | **28** | **25** | **22** | **37** |  | **36** | **36** | **30** |
| **θΒο** | **87±1** | **80±2** | **60±2** | **52±2** | **49±3** | **87±2** | **-85±2** | **-78±2** | **-78±2** | **-65±2** |
| **3** | **D** (±0.3) cm | 17.2 | 2.0 | 1.6 | 2.9 | 1.9 | 2.6 | 6.2 | 4.9 | 10.0 | 7.5 |
| **L** (±0.1) cm | 1.5 | 1.7 | 1.7 | 1.5 | 1.4 | 1.5 | 1.7 | 1.9 | 1.8 | 1.8 |
| **Bxz** (±1)nT | 35 | 37 | 37 | 34 | 31 | 34 | 32 | 25 | 18 | 18 |
| **By** (±1)nT | -5 | 1 | 4 | 7 | 7 | -3 | -8 | -13 | -16 | -17 |
| **B**(±1)nT | **35** | **37** | **37** | **35** | **32** | **34** | **33** | **28** | **24** | **25** |
| **θΒο** | **-81±2** | **88±2** | **84±2** | **78±2** | **77±2** | **-85±2** | **-75±2** | **-63±2** | **-49±2** | **-47±2** |
| **4** | **D** (±0.3) cm | 7.5 | 5.5 | 5.9 | 8.7 | 6.8 | 1.8 | 5.1 | 2.5 | 6.4 | 5.1 |
| **L** (±0.1) cm | 1.4 | 1.3 | 1.4 | 1.5 | 1.3 | 1.2 | 1.4 | 1.5 | 1.5 | 1.6 |
| **Bxz** (±1)nT | 31 | 33 | 39 | 37 | 38 | 32 | 26 | 24 | 7 | 5 |
| **By** (±1)nT | -8 | -5 | 2 | 3 | 2 | -7 | -12 | -15 | -19 | -18 |
| **B**(±1)nT | **32** | **33** | **39** | **37** | **38** | **33** | **28** | **28** | **20** | **19** |
| **θΒο** | **-75±2** | **-81±2** | **87±1** | **85±2** | **87±2** | **-77±2** | **-66±2** | **-58±2** | **-20±3** | **-16±3** |
| **5** | **D** (±0.3) cm | 1.9 | 2.3 | 9.7 | 4.1 | 3.6 | 2.0 | 4.5 |  | 3.8 |  |
| **L** (±0.1) cm | 1.0 | 1.2 | 1.1 | 1.2 | 1.2 | 1.1 | 1.0 | 1.1 |
| **Bxz** (±1)nT | 25 | 34 | 33 | 34 | 34 | 27 | 23 | 4 |
| **By** (±1)nT | -11 | -7 | -6 | -2 | -3 | -12 | -13 | -17 |
| **B**(±1)nT | **27** | **35** | **34** | **34** | **34** | **29** | **26** | **17** |
| **θΒο** | **-67±2** | **-78±2** | **-79±2** | **-86±2** | **-85±2** | **-67±2** | **-61±2** | **-13±3** |

**Table 1**. *Measurements D, L, and sensor readings of Bi (i=xz,y), with the x-sensor aligned along the common direction of Bxz, Μxz, on the body fragments of* ***vase 6****.*

*
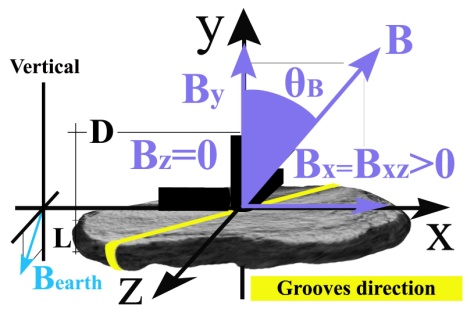
*


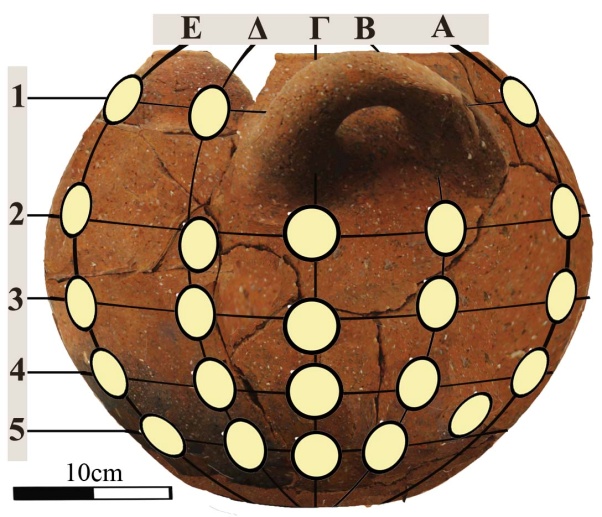

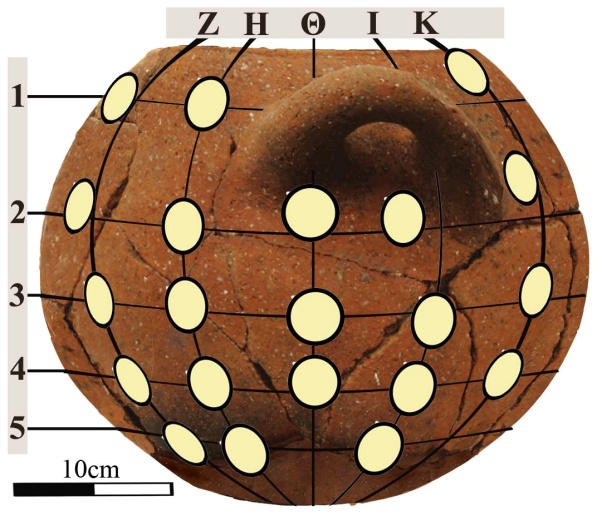


**Vase 6**


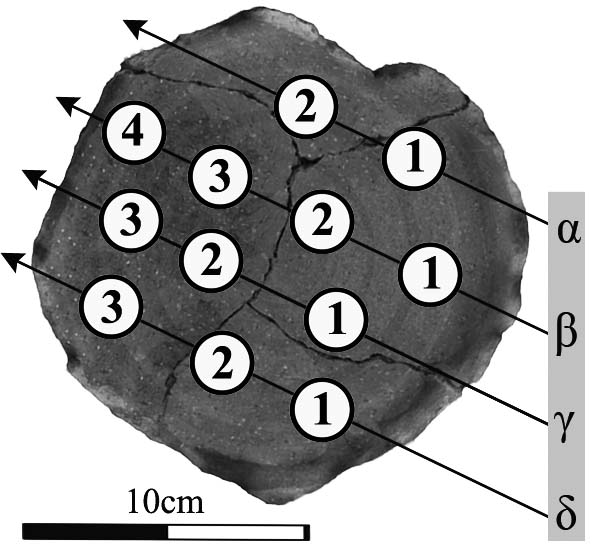


| **Vase 6**  **(Base)** | **λ** | **α˪(cm)** | **α//(cm)** |
| --- | --- | --- | --- |
| **1.90**  **±0.01** | **0.71**  **±0.03** | **1.07**  **±0.02** |

The computed magnitude of field, B, differs, while angles ,θΒ, varies in a systematic way.

| **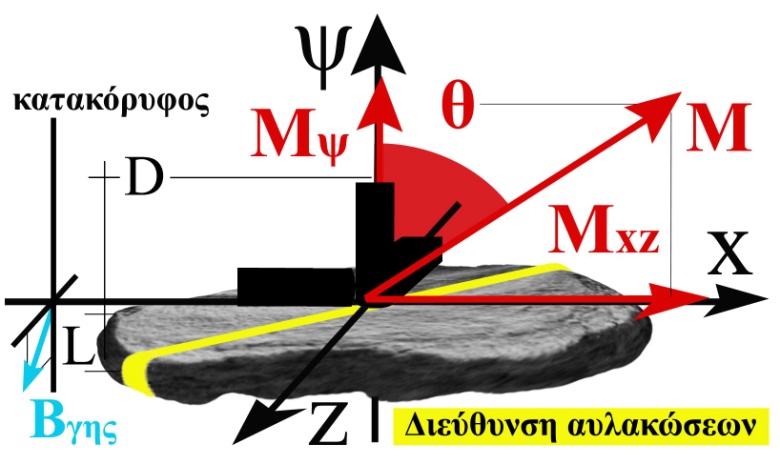Vase 6** | | **A** | **Β** | **Γ** | **Δ** | **Ε** | **Ζ** | **Η** | **Θ** | **Ι** | **Κ** |
| --- | --- | --- | --- | --- | --- | --- | --- | --- | --- | --- | --- |
| **1** | **D** (±0.3) cm | **4.2** |  |  | **3.4** | **6.2** | **2.2** | **6.2** |  |  | **10.6** |
| **d**(cm) | **3.6±1** | **0.2±0.0** | **0.2±0.0** | **1.5±0.2** | **4.4±1.4** | **5.6±1.8** |
| **θο** | **76±3** | **14±2** | **17±3** | **65±3** | **81±3** | **-81±3** |
| **Μxz**(mΑ/m) | **51±2** | **15±3** | **16±3** | **48±2** | **61±2** | **59±2** |
| **My** (Α/m) | **13±3** | **64±4** | **54±4** | **23±3** | **10±3** | **-10±3** |
| **Μ**(mΑ/m) | **53±2** | **66±4** | **56±4** | **53±2** | **61±2** | **60±2** |
| **2** | **D** (±0.3) cm | **2.4** | **14.8** | **10,7** | **1,2** | **6,3** | **4,8** | **3,2** | **2,1** | **3,4** | **2,5** |
| **d**(cm) | **16±7** | **4.7±0.8** | **1.6±0.1** | **1.3±0.1** | **1.0±0.1** | **15±7** | **10±3** | **4.5±0.6** | **4.8±0.7** | **2.2±0.2** |
| **θο** | **84±3** | **71±3** | **44±2** | **35±2** | **33±2** | **84±3** | **-80±3** | **-68±3** | **-68±3** | **-49±2** |
| **Μxz**(mΑ/m) | **62±2** | **56±2** | **40±2** | **35±2** | **30±2** | **59±2** | **54±2** | **57±2** | **56±2** | **44±2** |
| **My** (Α/m) | **6±3** | **19±3** | **42±3** | **49±3** | **47±3** | **6±3** | **-10±3** | **-22±3** | **-22±3** | **-39±3** |
| **Μ**(mΑ/m) | **62±2** | **59±2** | **58±3** | **60±3** | **56±3** | **59±2** | **55±2** | **61±2** | **60±2** | **59±2** |
| **3** | **D** (±0.3) cm | **17.2** | **2,0** | **1,6** | **2,9** | **1,9** | **2,6** | **6,2** | **4,9** | **10,0** | **7,5** |
| **d**(cm) | **5±1** | **32±30** | **8±2** | **3.7±0.5** | **3.1±0.5** | **8±3** | **3.4±0.4** | **2.0±0.2** | **1.1±0.1** | **1.1±0.1** |
| **θο** | **-74±3** | **87±3** | **78±3** | **68±3** | **66±3** | **-80±3** | **-64±3** | **-47±3** | **-32±2** | **-31±2** |
| **Μxz**(mΑ/m) | **56±2** | **59±2** | **59±2** | **55±2** | **50±2** | **54±2** | **51±2** | **41±2** | **31±2** | **31±2** |
| **My** (Α/m) | **-16±3** | **3±3** | **13±3** | **22±3** | **22±3** | **-10±3** | **-26±3** | **-39±3** | **-49±3** | **-53±3** |
| **Μ**(mΑ/m) | **58±2** | **59±2** | **61±2** | **59±2** | **55±2** | **55±2** | **57±2** | **56±2** | **58±3** | **61±3** |
| **4** | **D** (±0.3) cm | **7.5** | **5,5** | **5,9** | **8,7** | **6,8** | **1,8** | **5,1** | **2,5** | **6,4** | **5,1** |
| **d**(cm) | **2.7±0.4** | **4.3±0.8** | **14±6** | **9±3** | **12±6** | **2.8±0.4** | **1.7±0.2** | **1.3±0.1** | **0.3±0.1** | **0.3±0.1** |
| **θο** | **-63±3** | **-73±3** | **84±3** | **81±3** | **84±3** | **-67±3** | **-51±3** | **-42±2** | **-12±2** | **-9±2** |
| **Μxz**(mΑ/m) | **50±2** | **53±2** | **62±2** | **59±2** | **60±2** | **52±2** | **43±2** | **41±2** | **13±2** | **9±2** |
| **My** (Α/m) | **-26±3** | **-16±3** | **6±3** | **10±3** | **6±3** | **-22±3** | **-36±3** | **-46±3** | **-62±3** | **-58±3** |
| **Μ**(mΑ/m) | **56±2** | **55±2** | **62±2** | **60±2** | **61±2** | **57±2** | **56±2** | **62±3** | **63±3** | **59±3** |
| **5** | **D** (±0.3) cm | **1.9** | **2.3** | **9,7** | **4,1** | **3,6** | **2,0** | **4,5** |  | **3,8** |  |
| **d**(cm) | **1.3±0.2** | **2.9±0.4** | **3.0±0.5** | **10±5** | **7±2** | **1.4±0.1** | **1.0±0.5** | **0.2±0.0** |
| **θο** | **-53±3** | **-68±3** | **-70±3** | **-83±3** | **-80±3** | **-52±3** | **-46±3** | **-9±2** |
| **Μxz**(mΑ/m) | **43±2** | **55±2** | **53±2** | **54±2** | **54±2** | **46±2** | **41±2** | **9±2** |
| **My** (Α/m) | **-33±3** | **-22±3** | **-19±3** | **-6±3** | **-10±3** | **-36±3** | **-40±3** | **-59±4** |
| **Μ**(mΑ/m) | **54±2** | **59±2** | **56±2** | **55±2** | **55±2** | **58±2** | **57±3** | **59±4** |

**Table 2.** *Computation of the angles θ, of the distances d, and of the magnetization components My, Mxz, from the field components, By, Bxz, with the x-sensor axis aligned along the common direction of Bxz, Mxz. The values inside the colored frames (D<d=L.tanθ) are computed using the sufficient length relationships(4).*


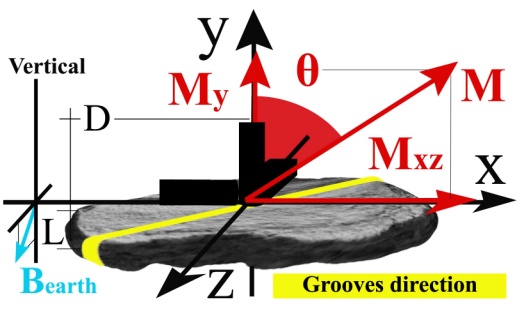


**Vase 6**


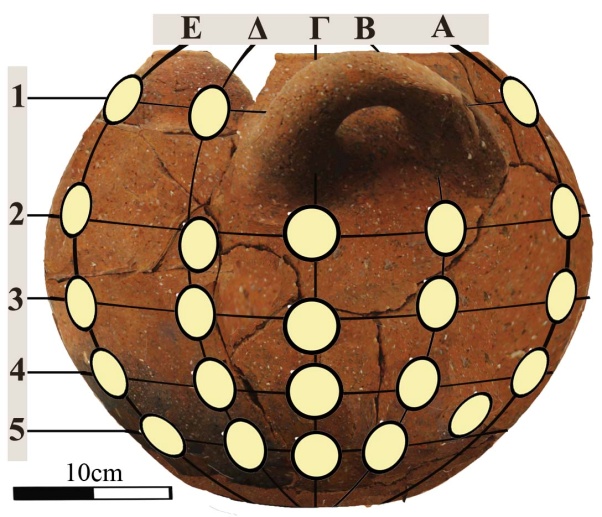

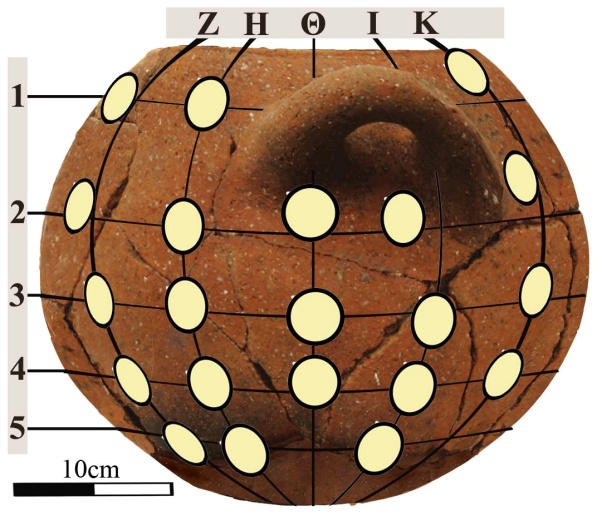


| **Vase 6**  **(Base)** | **M˪** | **Μ//** | **Μ** | **γο** |
| --- | --- | --- | --- | --- |
| **(mA/m)** | | |
| **42.5**  **±0.2** | **39.8**  **±0.2** | **58.3**  **±0.2** | **43.3**  **±0.3** |

The computed magnitude, M, displays similar values in the base and body fragments. For the body fragments, angles, θ, change in a systematic way.

| **Αγγείο 6** | | **A** | **Β** | **Γ** | **Δ** | **Ε** | **Ζ** | **Η** | **Θ** | **Ι** | **Κ** |
| --- | --- | --- | --- | --- | --- | --- | --- | --- | --- | --- | --- |
| **1** | **Βy** (±1nΤ) | 5 |  |  | 17 | 13 | 8 | 3 |  |  | -4 |
| **Bx**(±1nΤ) | -21 | -3 | 3 | 23 | 23 | 1 |
| **Bz**(±1nΤ) | 22 | 7 | 6 | 21 | 28 | 34 |
| **B**(±1nΤ) | **31** | **18** | **14** | **32** | **36** | **34** |
| **θΒο** | **80±2** | **24±10** | **28±11** | **75±2** | **85±2** | **-83±2** |
| **φΒο** | **134±2** |  |  | **113±8** | **63±9** | **42±2** | **51±2** |  |  | **88±2** |
| **2** | **Βy** (±1nΤ) | 1 | 7 | 14 | 17 | 15 | 2 | -2 | -7 | -7 | -13 |
| **Bx**(±1nΤ) | -26 | -22 | -17 | -5 | 5 | 25 | 24 | 15 | 6 | -1 |
| **Bz**(±1nΤ) | 29 | 21 | 23 | 20 | 23 | 27 | 32 | 29 | 28 | 31 |
| **B**(±1nΤ) | **39** | **31** | **32** | **27** | **28** | **37** | **40** | **33** | **30** | **33** |
| **θΒο** | **88±1** | **76±2** | **64±2** | **51±3** | **58±3** | **87±2** | **-87±1** | **-77±2** | **-76±2** | **-68±2** |
| **φΒο** | **132±1** | **136±2** | **126±2** | **104±3** | **78±2** | **47±2** | **53±1** | **63±2** | **78±2** | **92±2** |
| **3** | **Βy** (±1nΤ) | -5 | 2 | 4 | 8 | 7 | -4 | -7 | -12 | -17 | -17 |
| **Bx**(±1nΤ) | -27 | -20 | -13 | -3 | 2 | 26 | 25 | 15 | 5 | -5 |
| **Bz**(±1nΤ) | 27 | 25 | 26 | 33 | 34 | 27 | 25 | 18 | 20 | 17 |
| **B**(±1nΤ) | **39** | **32** | **29** | **34** | **35** | **38** | **36** | **26** | **27** | **24** |
| **θΒο** | **-82±2** | **86±2** | **82±2** | **76±2** | **78±2** | **-84±2** | **-78±2** | **-64±3** | **-51±3** | **-46±4** |
| **φΒο** | **135±2** | **129±2** | **117±2** | **95±2** | **87±2** | **46±2** | **45±2** | **50±2** | **76±3** | **106±3** |
| **4** | **Βy** (±1nΤ) | -7 | -5 | 2 | 4 | 1 | -7 | -12 | -14 | -19 | -18 |
| **Bx**(±1nΤ) | -25 | -26 | -11 | -1 | 5 | 23 | 21 | 19 | 1 | -2 |
| **Bz**(±1nΤ) | 24 | 28 | 31 | 38 | 38 | 22 | 14 | 14 | 3 | 5 |
| **B**(±1nΤ) | **35** | **39** | **33** | **38** | **38** | **33** | **28** | **27** | **19** | **19** |
| **θΒο** | **-78±2** | **-82±2** | **86±2** | **84±2** | **88±1** | **-77±2** | **-65±2** | **-60±3** | **-9±25** | **-17±15** |
| **φΒο** | **136±2** | **133±1** | **110±2** | **92±2** | **83±1** | **44±2** | **34±2** | **36±2** | **72±18** | **112±11** |
| **5** | **Βy** (±1nΤ) | -12 | -7 | -5 | -2 | -3 | -11 | -13 |  | -16 |  |
| **Bx**(±1nΤ) | -22 | -19 | -11 | -8 | 7 | 23 | 18 | 3 |
| **Bz**(±1nΤ) | 14 | 20 | 28 | 39 | 33 | 16 | 10 | -1 |
| **B**(±1nΤ) | **29** | **29** | **31** | **40** | **34** | **30** | **24** | **16** |
| **θΒο** | **-66±2** | **-75±2** | **-80±2** | **-87±1** | **-85±2** | **-69±2** | **-58±3** | **-11±25** |
| **φΒο** | **148±2** | **134±2** | **111±2** | **102±1** | **78±2** | **35±2** | **29±3** | **342±18** |

**Table 3.** *Sensor readings with the x-sensor oriented in the grooves’ direction on the body fragments of* ***vase 6.***


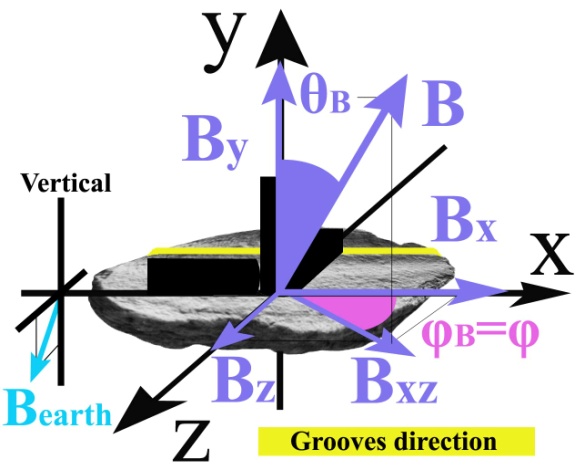


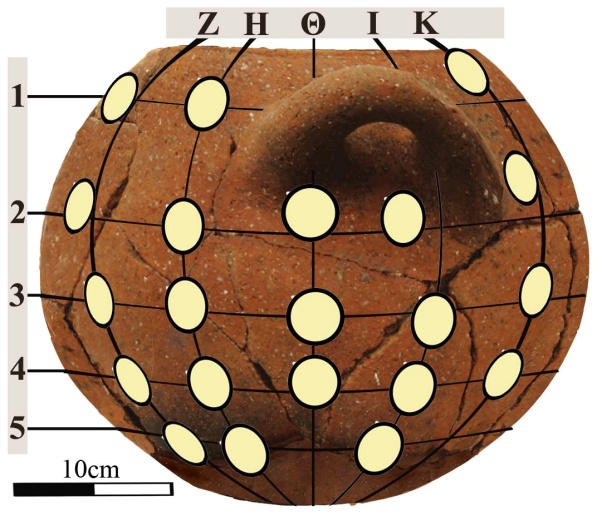

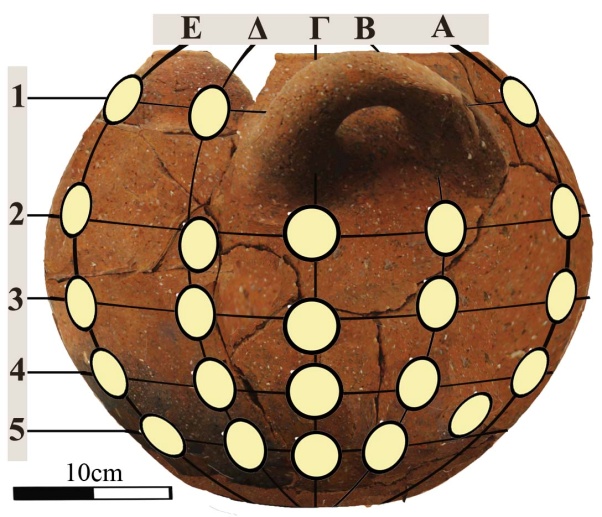


**Vase 6**

The magnitude of field ,B, varies, while the angles, θΒ, φΒ change in a systematic way.

| **Vase 6** | | **A** | **Β** | **Γ** | **Δ** | **Ε** | **Ζ** | **Η** | **Θ** | **Ι** | **Κ** |
| --- | --- | --- | --- | --- | --- | --- | --- | --- | --- | --- | --- |
| **1** | **Μy** (mΑ/m) | 16±3 |  |  | 64±4 | 50±4 | 26±3 | 10±3 |  |  | -13±3 |
| **Μx** (mΑ/m) | -34±2 | -8±3 | 8±3 | 38±2 | 37±2 | 2±2 |
| **Μz** (mΑ/m ) | 35±2 | 18±3 | 16±3 | 35±2 | 45±2 | 54±2 |
| **Μ** (mΑ/m ) | **51±**2 | **67±**4 | **53±**4 | **58±**2 | **58±**2 | **56±**2 |
| **θο** | **72±**4 | **17±**17 | **20±**18 | **63±**4 | **81±**3 | **-77±**3 |
| **φο** | **134±**2 | **113±**8 | **63±**9 | **42±**2 | **51±**2 | **88±**2 |
| **2** | **Μy** (mΑ/m) | 3±4 | 22±3 | 42±3 | 53±4 | 47±3 | 6±4 | -6±4 | -22±4 | -22±4 | -39±3 |
| **Μx** (mΑ/m) | -41±2 | -35±2 | -28±2 | -9±2 | 9±2 | 40±2 | 38±2 | 24±2 | 10±2 | -2±2 |
| **Μz** (mΑ/m ) | 46±2 | 34±2 | 39±2 | 35±2 | 41±2 | 43±2 | 51±2 | 47±2 | 45±2 | 51±2 |
| **Μ** (mΑ/m ) | **62** | **53±**2 | **64±**2 | **63±**4 | **63±**3 | **59±**2 | **64±**2 | **57±**2 | **51±**2 | **64±**2 |
| **θο** | **87±**4 | **65±**4 | **49±**4 | **34±**8 | **42±**5 | **84±**4 | **-84±**4 | **-67±**5 | **-64±**6 | **-53±**4 |
| **φο** | **132±**1 | **136±**2 | **126±**2 | **104±**3 | **78±**2 | **47±**2 | **53±**1 | **63±**2 | **78±**2 | **92±**2 |
| **3** | **Μy** (mΑ/m) | -16±3 | 6±4 | 13±4 | 26±4 | 22±4 | -13±4 | -22±3 | -35±3 | -53±3 | -53±3 |
| **Μx** (mΑ/m) | -43±2 | -32±2 | -21±2 | -5±2 | 3±2 | 41±2 | 40±2 | 25±2 | 9±2 | -9±2 |
| **Μz** (mΑ/m ) | 43±2 | 40±2 | 42±2 | 53±2 | 55±2 | 43±2 | 40±2 | 30±2 | 35±2 | 30±2 |
| **Μ** (mΑ/m ) | **63±**2 | **51±**2 | **48±**2 | **59±**2 | **60±**2 | **61±**2 | **61±**2 | **52±**2 | **63±**3 | **61±**3 |
| **θο** | **-75±**3 | **83±**5 | **75±**5 | **64±**5 | **68±**4 | **-78±**4 | **-68±**3 | **-47±**5 | **-34±**6 | **-30±**7 |
| **φο** | **135±**2 | **129±**2 | **117±**2 | **95±**2 | **87±**2 | **46±**2 | **45±**2 | **50±**2 | **76±**3 | **106±**3 |
| **4** | **Μy** (mΑ/m) | -22±3 | -16±3 | 6±4 | 13±4 | 3±4 | -22±4 | -36±3 | -43±3 | -62±3 | -58±3 |
| **Μx** (mΑ/m) | -40±2 | -41±2 | -18±2 | -2±2 | 8±2 | 37±2 | 35±2 | 33±3 | 2±2 | -4±2 |
| **Μz** (mΑ/m ) | 39±2 | 45±2 | 49±2 | 60±2 | 60±2 | 36±2 | 23±2 | 24±2 | 6±2 | 9±2 |
| **Μ** (mΑ/m ) | **60±**2 | **63±**2 | **53±**2 | **62±**2 | **61±**2 | **56±**2 | **55±**2 | **59±**3 | **62±**3 | **59±**3 |
| **θο** | **-68±**3 | **-75±**3 | **83±**5 | **78±**4 | **87±**4 | **-67±**5 | **-50±**5 | **-44±**5 | **-6±**44 | **-10±**26 |
| **φο** | **136±**2 | **133±**2 | **110±**2 | **92±**2 | **83±**1 | **44±**2 | **34±**2 | **36±**2 | **72±**18 | **112±**11 |
| **5** | **Μy** (mΑ/m) | -36±3 | -22±4 | -16±3 | -6±4 | -10±4 | -33±3 | -40±3 |  | -55±4 |  |
| **Μx** (mΑ/m) | -38±2 | -31±2 | -18±2 | -13±2 | 11±2 | 39±2 | 32±2 | 7±2 |
| **Μz** (mΑ/m ) | 24±2 | 32±2 | 45±2 | 62±2 | 53±2 | 27±2 | 18±2 | -2±2 |
| **Μ** (mΑ/m ) | **57±**2 | **50±**2 | **51±**2 | **64±**2 | **55±**2 | **58±**2 | **54±**3 | **55±**4 |
| **θο** | **-51±4** | **27±6** | **-72±4** | **-84±4** | **-80±5** | **-56±4** | **-43±6** | **-7±42** |
| **φο** | **148±**2 | **134±**2 | **111±**2 | **102±**1 | **78±**2 | **35±**2 | **29±**3 | **342±**`18 |

**Table 4**. *Computation of the magnetization components ,Mi,(i=x,y,z), of the magnitude M and of the angles θ,φ, from sensor readings with the x-sensor oriented in the grooves direction in body fragments of* ***vase 6.***


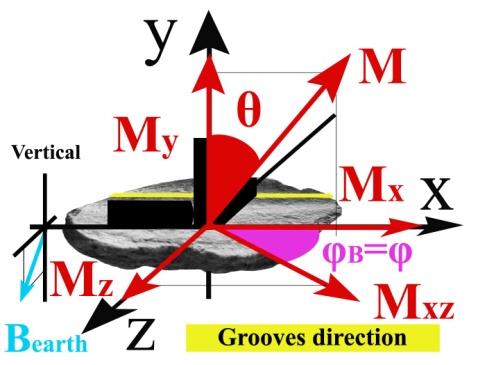


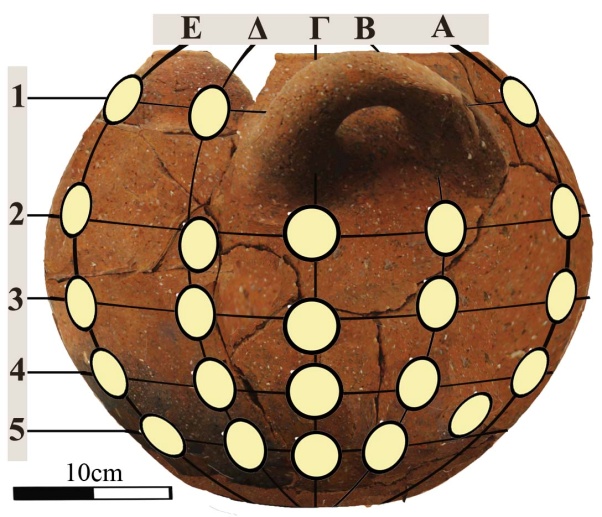

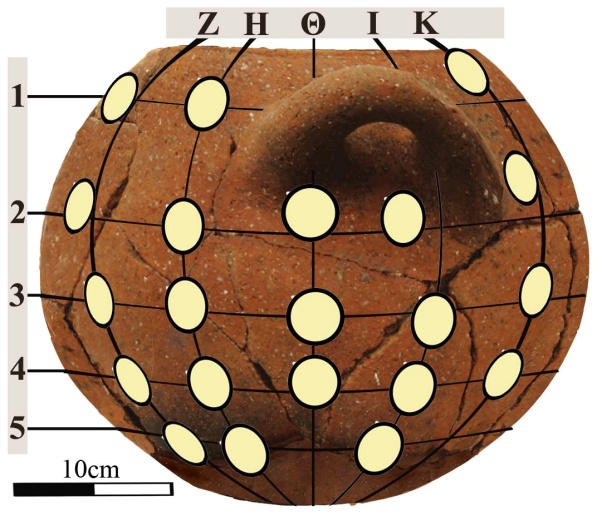


**Vase 6**

The computed magnitude, M, displays similar values in the base and body fragments, which is a criterion for finding ceramic fragments of the same vase from archaeological excavations. The angles, θ,φ, change in a systematic way.


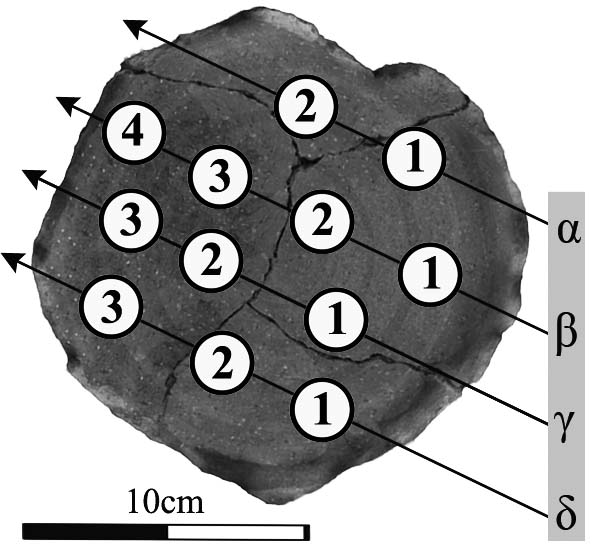


| **Vase 6** | **Μ˪** | **Μ//** | **Μ** | **γο** |
| --- | --- | --- | --- | --- |
| **(Base)**  (mA/m) | 42.5  ±0.2 | 39.8  ±0.2 | **58.3**  **±0.2** | **43.3**  **±0.3** |

| **Vase 1** | |
| --- | --- |
| **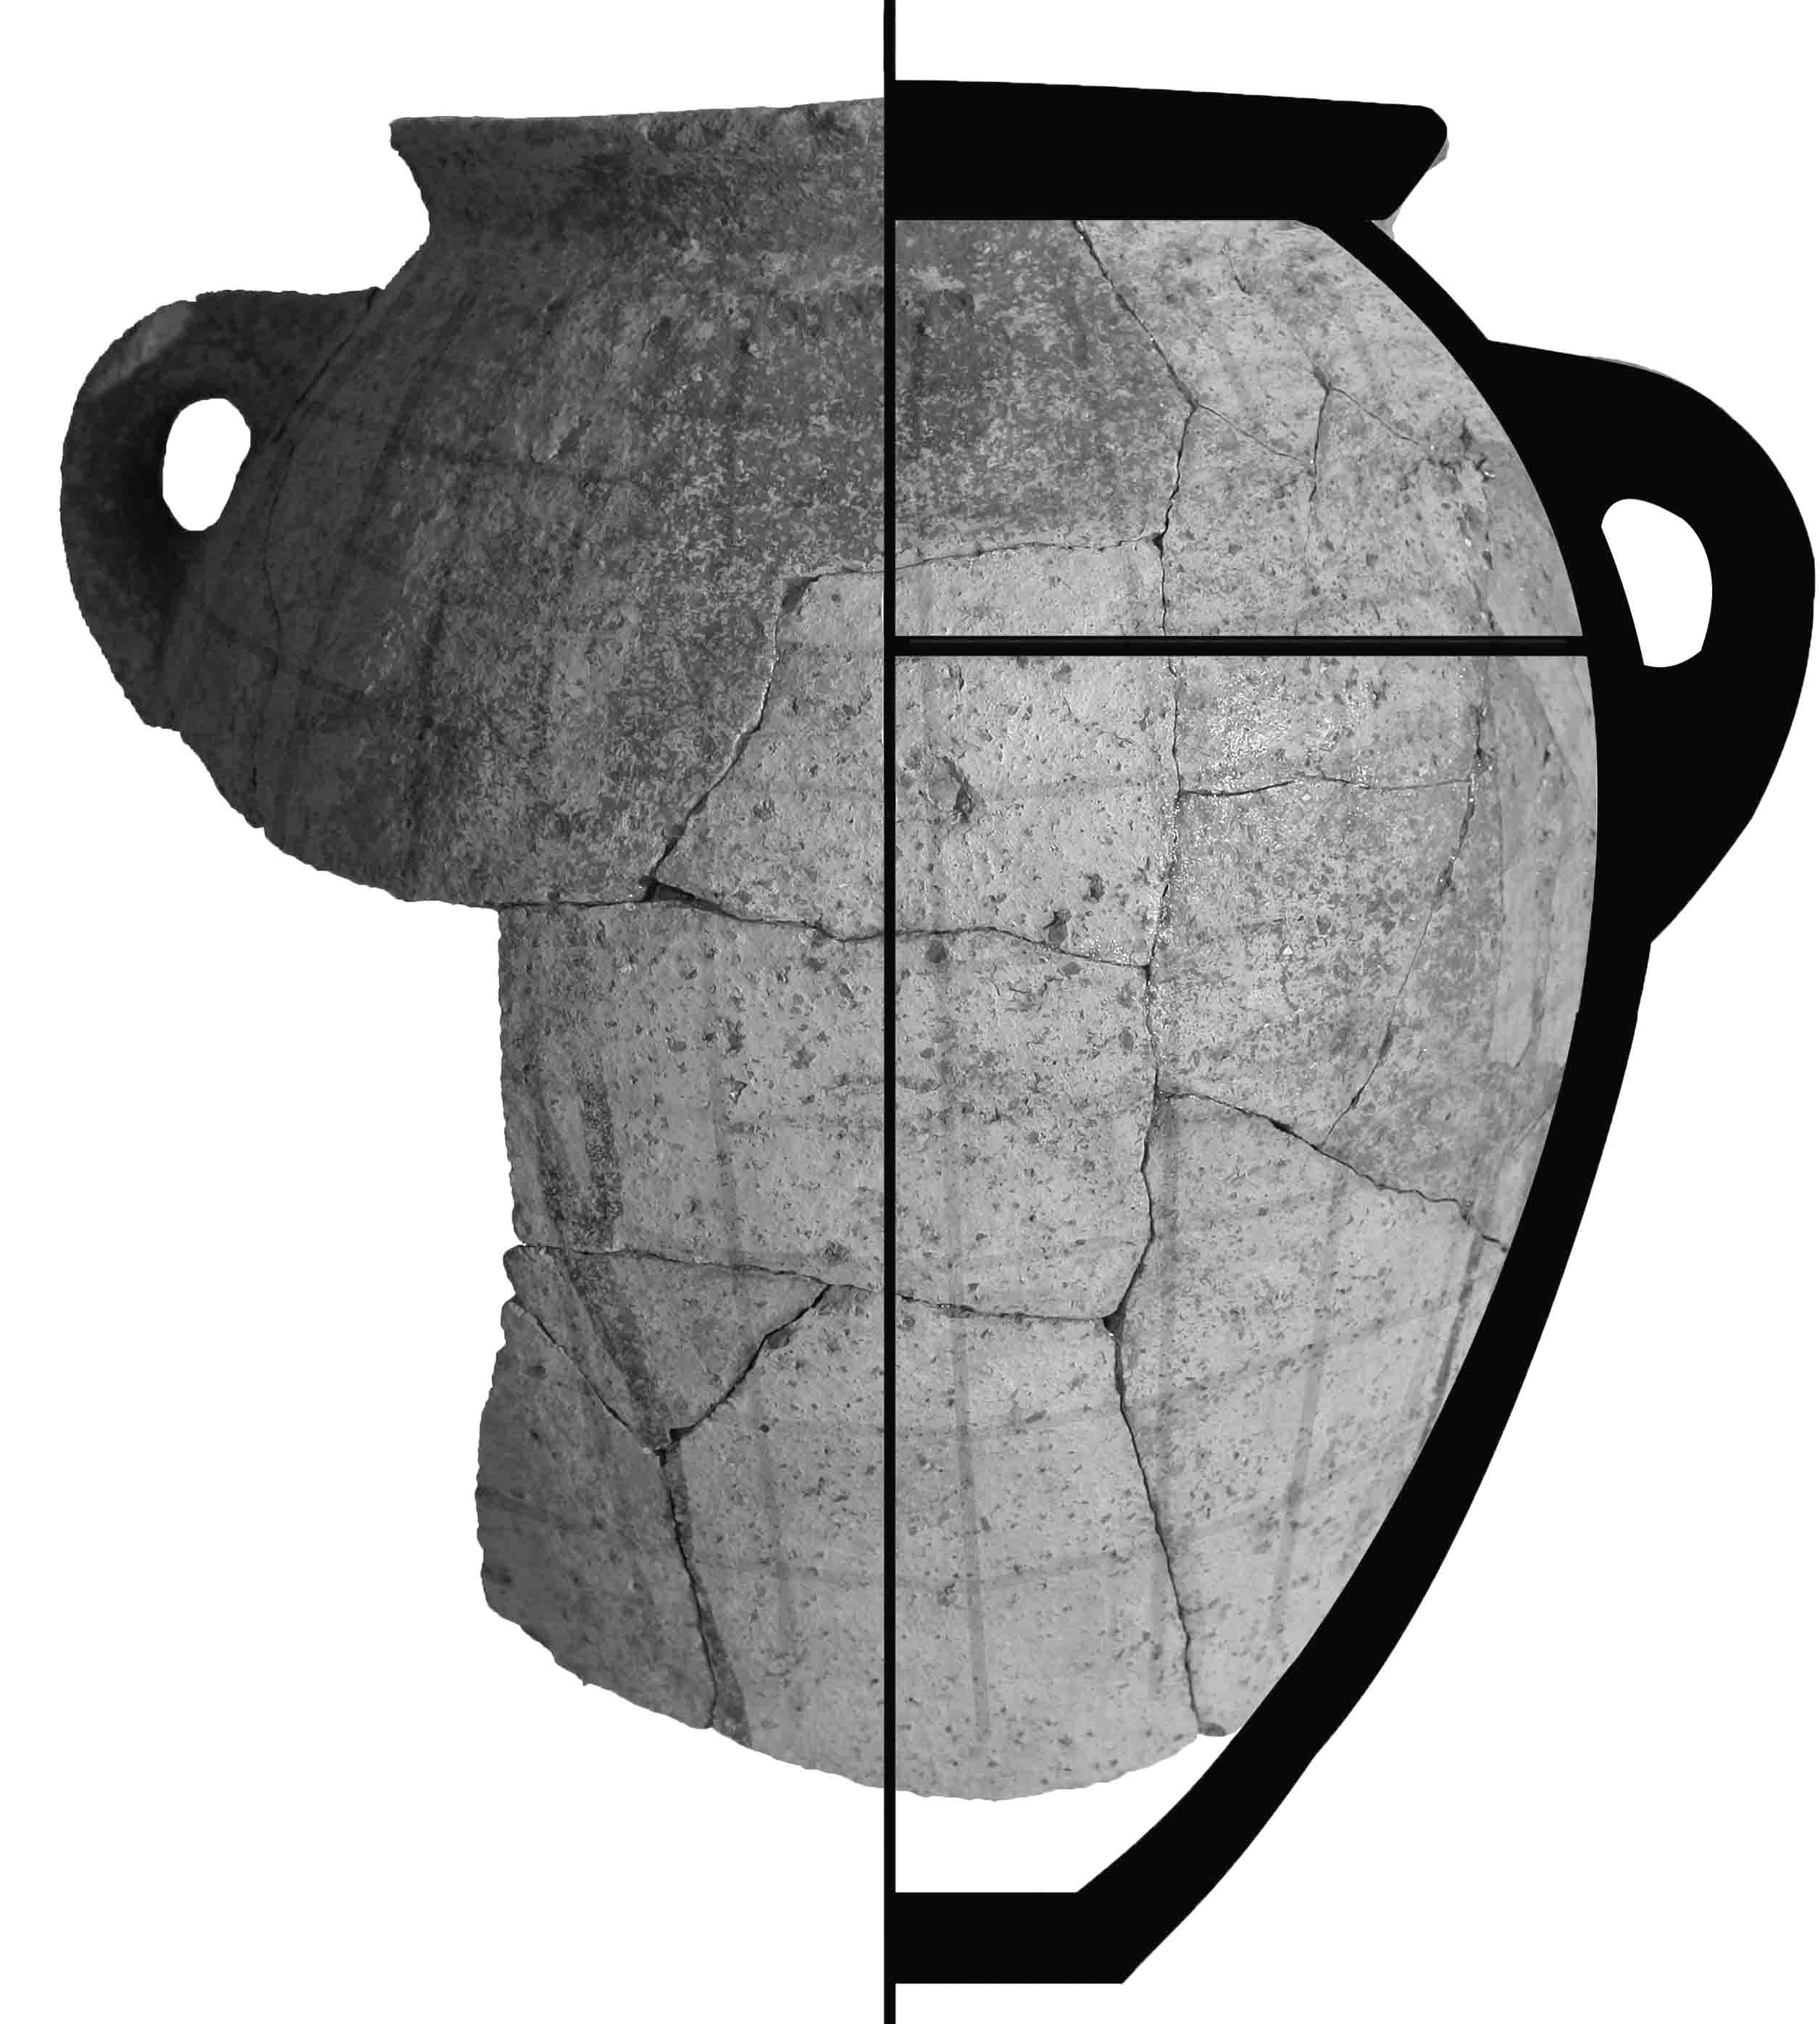** | |  | | | | | | **αy˪**(cm) | **αx,z//**(cm) | | **λ** | |
| **0,82±0,04** | **1,42±0,02** | | **2,0±0,1** | |
|  |
| **A** | **Β** | **Γ** | **Δ** | **Ε** | **Ζ** | | **Η** | **Θ** | | **Ι** |
| **1** | **D** (±0.3) cm | **5.2** | **9.5** | **15.3** | **29.5** | **23.8** | **17.1** | | **11.3** | **3.7** | |  |
| **L** (±0.1) cm | **1,0** | **1.1** | **1.1** | **1.2** | **1.1** | **1.1** | | **1.0** | **1.1** | |  |
| **Bxz** (±1)nT | **50** | **33** | **18** | **2** | **15** | **40** | | **55** | **80** | |
| **By** (±1)nT | **23** | **33** | **33** | **36** | **31** | **30** | | **25** | **7** | |
| **B**(±1)nT | **55** | **47** | **38** | **36** | **34** | **50** | | **60** | **80** | |
| **θΒο** | **65±1** | **45±1** | **29±2** | **3±2** | **26±2** | **53±1** | | **66±1** | **85±1** | |
| **2** | **D** (±0.3) cm | **5.3** | **10.7** | **16.7** | **18.9** | **24.3** | **18.3** | | **13.1** | **3.5** | |  |
| **L** (±0.1) cm | **1.1** | **1.1** | **1.2** | **1.2** | **1.3** | **1.3** | | **1.2** | **1.2** | |
| **Bxz** (±1)nT | **67** | **33** | **20** | **9** | **25** | **38** | | **64** | **83** | |
| **By** (±1)nT | **22** | **31** | **35** | **35** | **33** | **31** | | **23** | **5** | |
| **B**(±1)nT | **71** | **45** | **40** | **36** | **41** | **49** | | **68** | **83** | |
| **θΒο** | **72±1** | **47±1** | **30±1** | **14±2** | **37±1** | **51±1** | | **70±1** | **87±1** | |
| **3** | **D** (±0.3) cm | **6.6** | **3.0** | **3.8** | **22.8** | **29.5** | **19.9** | | **15.4** | **2.9** | |  |
| **L** (±0.1) cm | **1.2** | **1.2** | **1.3** | **1.2** | **1.3** | **1.4** | | **1.3** | **1.3** | |
| **Bxz** (±1)nT | **71** | **37** | **22** | **16** | **31** | **48** | | **73** | **81** | |
| **By** (±1)nT | **20** | **32** | **35** | **34** | **31** | **28** | | **18** | **2** | |
| **B**(±1)nT | **74** | **49** | **41** | **38** | **44** | **56** | | **75** | **81** | |
| **θΒο** | **74±1** | **49±1** | **32±1** | **25±2** | **45±1** | **60±1** | | **76±1** | **89±1** | |
| **4** | **D** (±0.3) cm | **7.2** | **4.4** | **8.8** | **6.7** | **5.9** | **22.7** | | **15.9** | **3.3** | | **10.3** |
| **L** (±0.1) cm | **1.2** | **1.3** | **1.4** | **1.3** | **1.4** | **1.4** | | **1.4** | **1.4** | | **1.4** |
| **Bxz** (±1)nT | **75** | **55** | **37** | **32** | **33** | **54** | | **70** | **83** | | **82** |
| **By** (±1)nT | **17** | **25** | **31** | **31** | **33** | **26** | | **19** | **-5** | | **-9** |
| **B**(±1)nT | **77** | **60** | **48** | **45** | **47** | **60** | | **73** | **83** | | **81** |
| **θΒο** | **77±1** | **66±1** | **50±1** | **46±1** | **45±1** | **64±1** | | **75±1** | **-87±1** | | **-83±1** |
| **5** | **D** (±0.3) cm | **2.8** | **7.9** | **2.5** | **12.8** | **11.4** | **24.0** | | **11.7** | **6.1** | | **7.9** |
| **L** (±0.1) cm | **1.3** | **1.3** | **1.3** | **1.3** | **1.5** | **1.4** | | **1.4** | **1.5** | | **1.5** |
| **Bxz** (±1)nT | **78** | **63** | **44** | **37** | **44** | **66** | | **75** | **81** | | **79** |
| **By** (±1)nT | **15** | **24** | **32** | **32** | **32** | **22** | | **15** | **-6** | | **-9** |
| **B**(±1)nT | **79** | **67** | **54** | **49** | **54** | **70** | | **76** | **81** | | **80** |
| **θΒο** | **79±1** | **69±1** | **54±1** | **49±1** | **54±1** | **72±1** | | **79±1** | **-86±1** | | **-84±1** |

**Table 5a**. *Measurements D, L, and sensor readings of Bi (i=xz,y), with the x-sensor aligned along the common direction of Bxz, Μxz, on the body fragments of* ***vase 1****.*

**
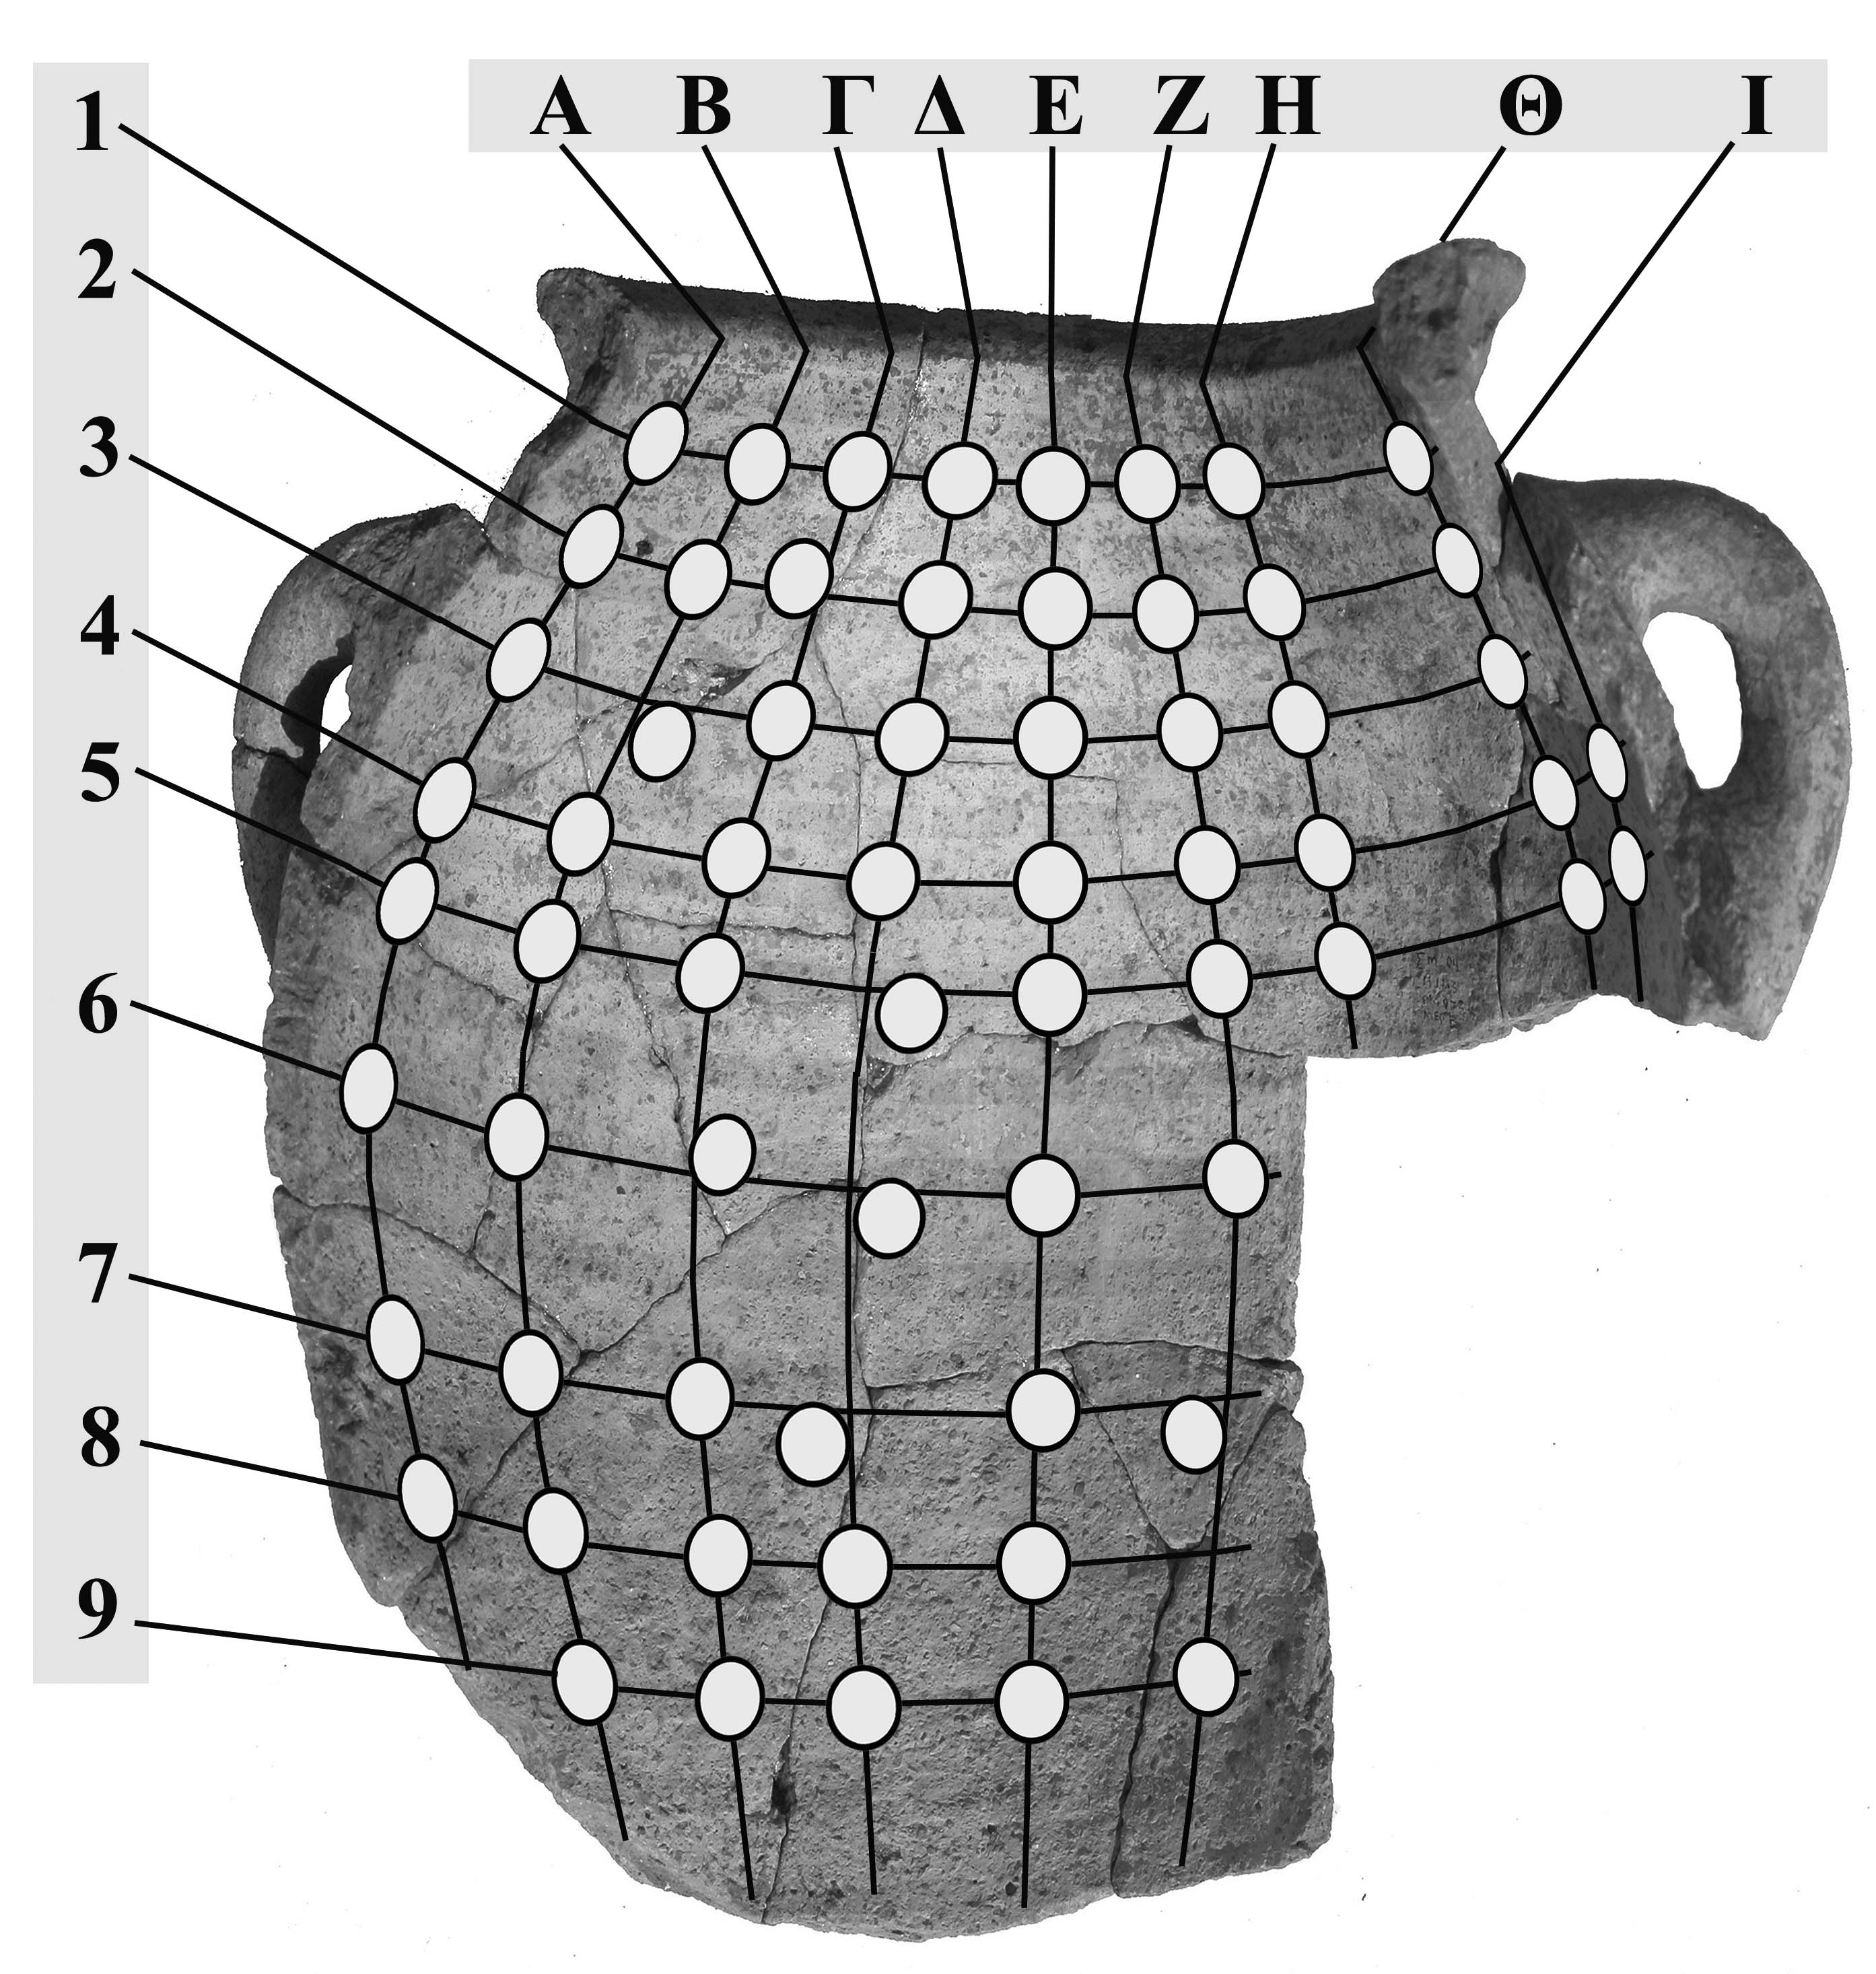
**

| **Vase 1** | |  | | | | | | | | |
| --- | --- | --- | --- | --- | --- | --- | --- | --- | --- | --- |
| **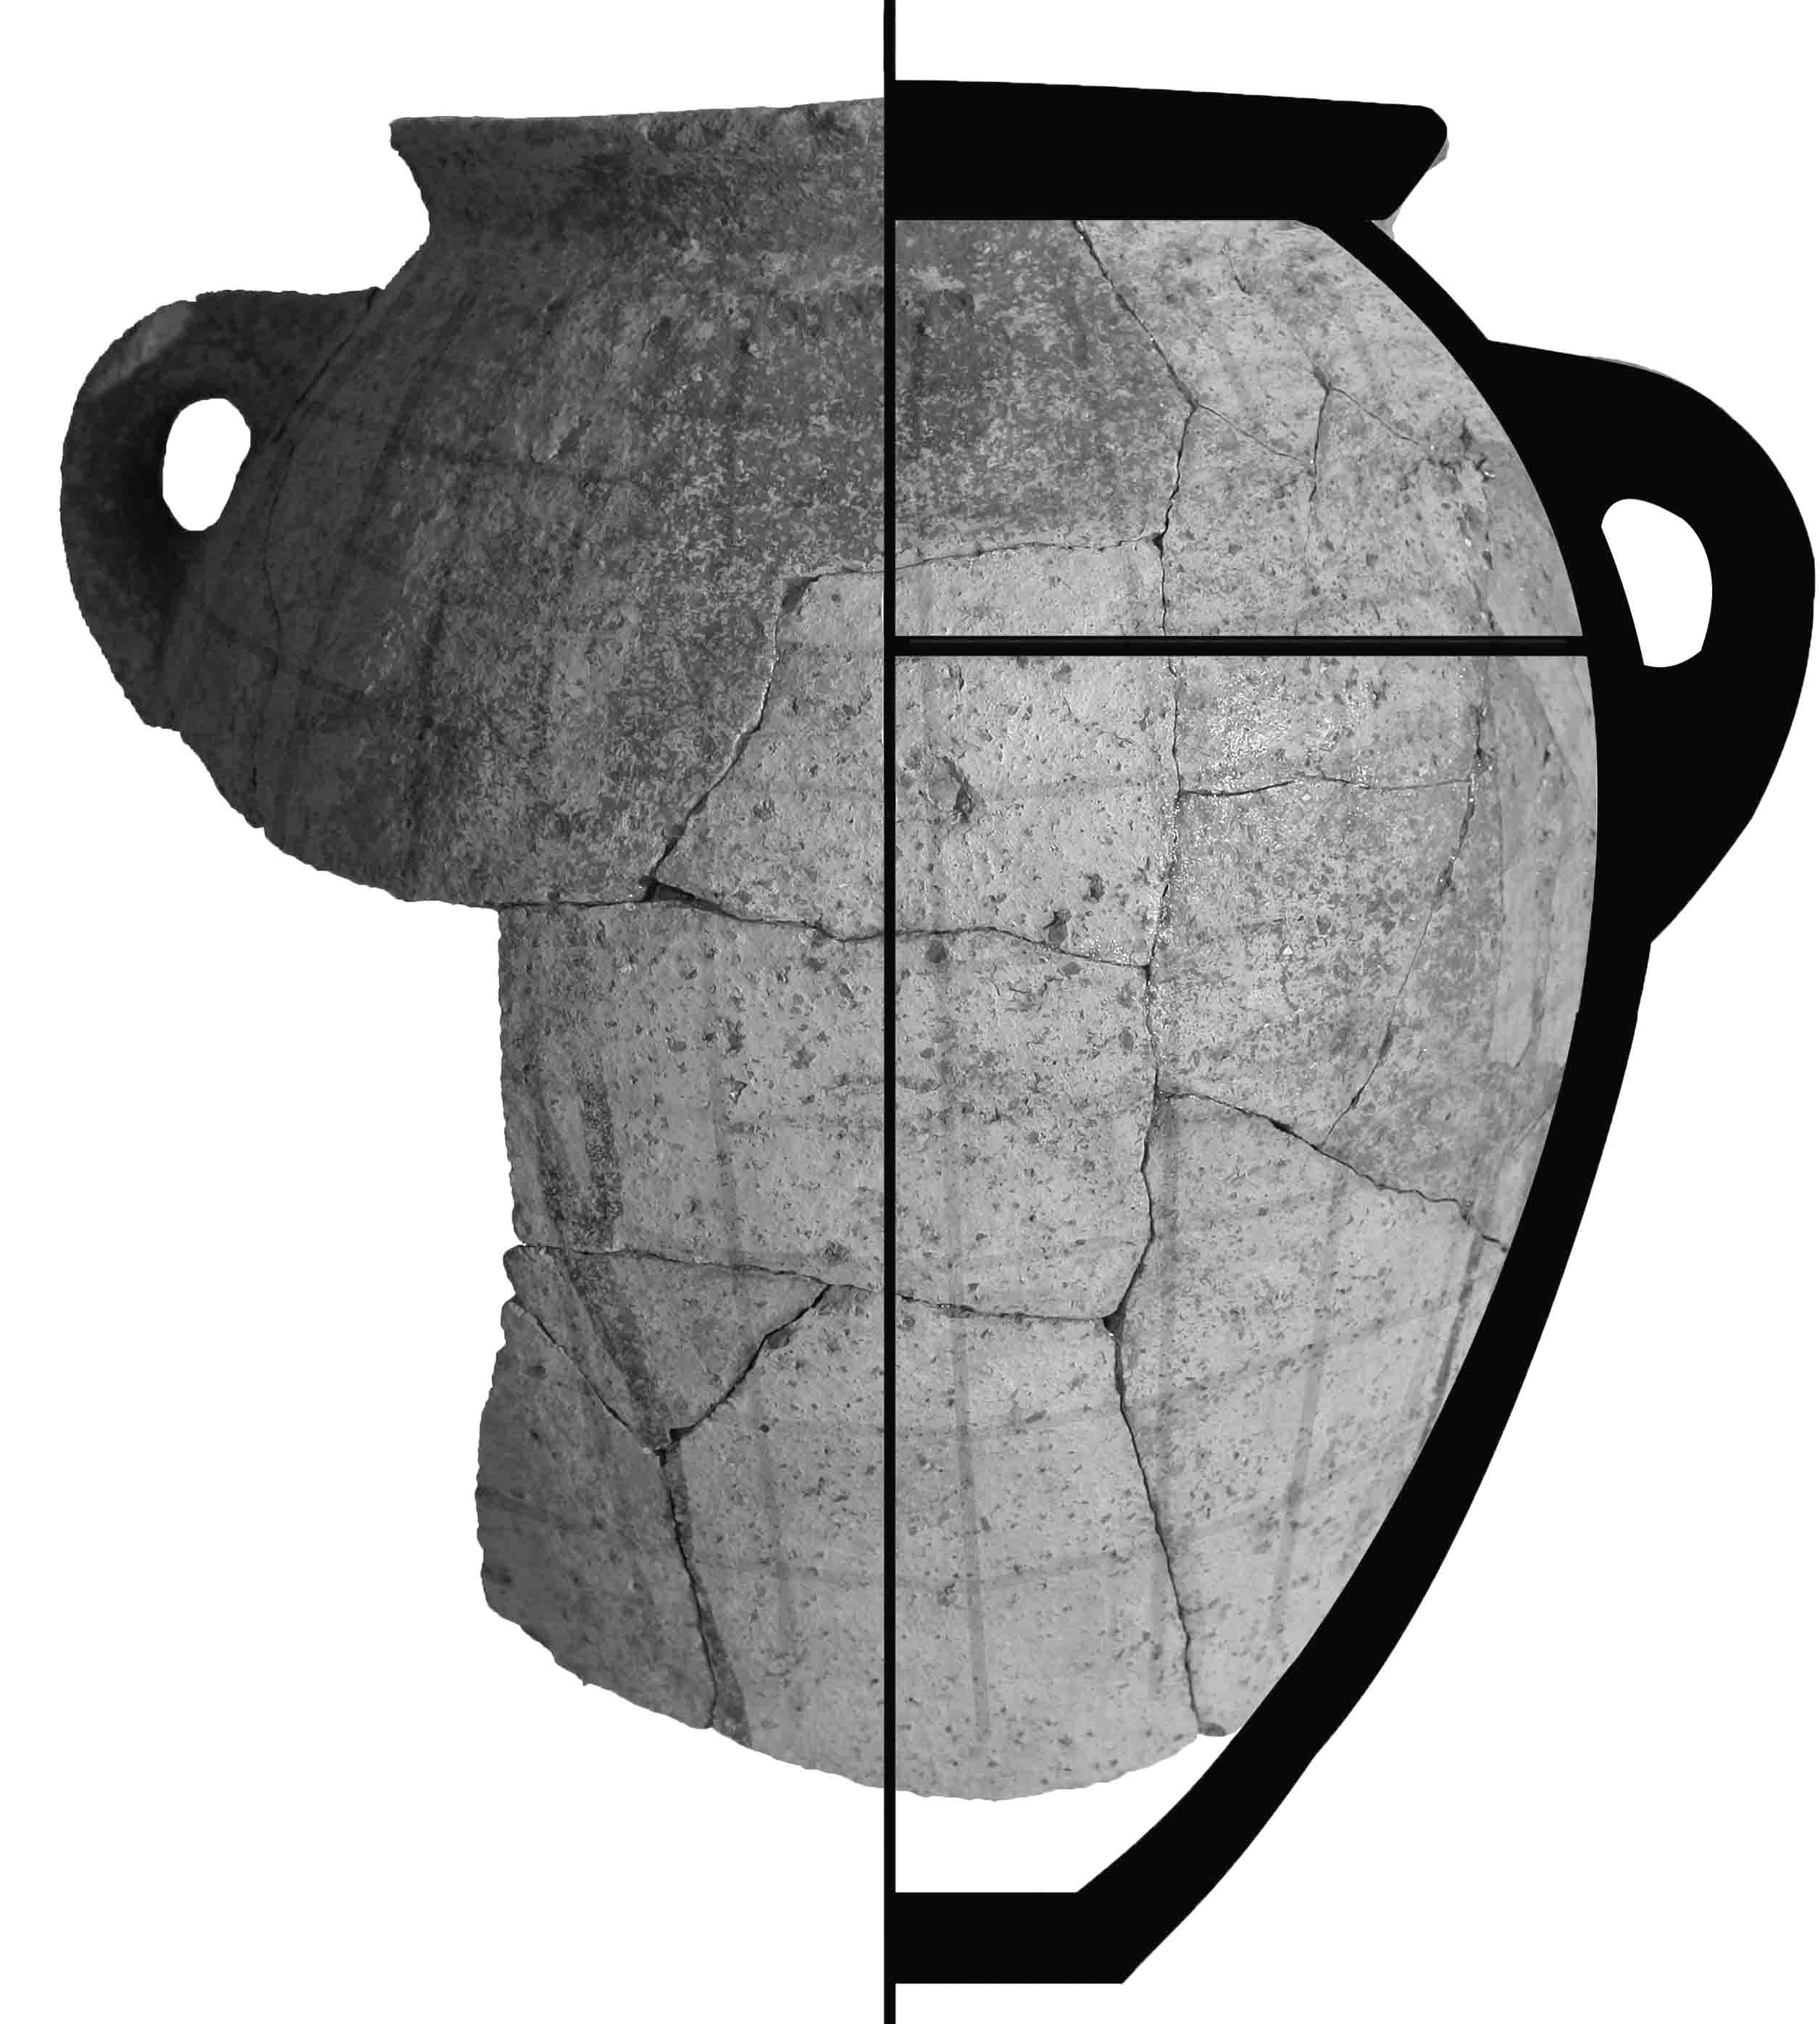** | |
| **A** | **Β** | **Γ** | **Δ** | **Ε** | **Ζ** | **Η** | **Θ** | **Ι** |
| **6** | **D** (±0.3) cm | **6.9** | **3.2** | **12,7** | **6.7** | **8.2** | **8.0** |  |  |  |
| **L** (±0.1) cm | **1.6** | **1.5** | **1,4** | **1.5** | **1.6** | **1.7** |
| **Bxz** (±1)nT | **76** | **70** | **63** | **58** | **68** | **79** |  |
| **By** (±1)nT | **12** | **17** | **27** | **27** | **21** | **13** |
| **B**(±1)nT | **77** | **72** | **69** | **64** | **71** | **80** |
| **θΒο** | **81±1** | **76±1** | **67±1** | **65±1** | **73±1** | **81±1** |  |  |  |
| **7** | **D** (±0.3) cm | **7.1** | **4.9** | **5.4** | **11.8** | **3.3** | **3.6** |  |  |  |
| **L** (±0.1) cm | **1.7** | **1.7** | **1.8** | **1.7** | **1.8** | **1.7** |
| **Bxz** (±1)nT | **85** | **78** | **73** | **66** | **71** | **81** |  |  |
| **By** (±1)nT | **2** | **12** | **19** | **22** | **20** | **8** |  |  |  |
| **B**(±1)nT | **85** | **79** | **75** | **70** | **74** | **81** |
| **θΒο** | **89±1** | **81±1** | **75±1** | **72±1** | **74±1** | **84±1** |
| **8** | **D** (±0.3) cm | **7.4** | **4.5** | **10.9** | **8.8** | **9.6** | **5.5** |  |  |  |
| **L** (±0.1) cm | **1.8** | **1.8** | **1.9** | **1.9** | **1.9** | **2.0** |
| **Bxz** (±1)nT | **86** | **76** | **76** | **69** | **73** | **80** |
| **By** (±1)nT | **1** | **13** | **17** | **18** | **19** | **8** |
| **B**(±1)nT | **86** | **77** | **78** | **71** | **75** | **80** |  |
| **θΒο** | **89±1** | **80±1** | **77±1** | **75±1** | **75±1** | **84±1** |  |  |
| **9** | **D** (±0.3) cm |  | **10.2** | **16.9** | **15.2** | **13.8** | **11.2** |  |  |  |
| **L** (±0.1) cm | **1.9** | **2.0** | **2.1** | **2.0** | **2.0** |
| **Bxz** (±1)nT | **79** | **79** | **76** | **78** | **82** |  |  |  |
| **By** (±1)nT | **5** | **14** | **16** | **14** | **4** |
| **B**(±1)nT | **79** | **80** | **78** | **79** | **82** |
| **θΒο** | **86±1** | **80±1** | **78±1** | **80±1** | **87±1** |

**Table 5b**. *Measurements D, L, and sensor readings of Bi (i=xz,y), with the x-sensor aligned along the common direction of Bxz, Μxz, on the body fragments of* ***vase 1****.*

**
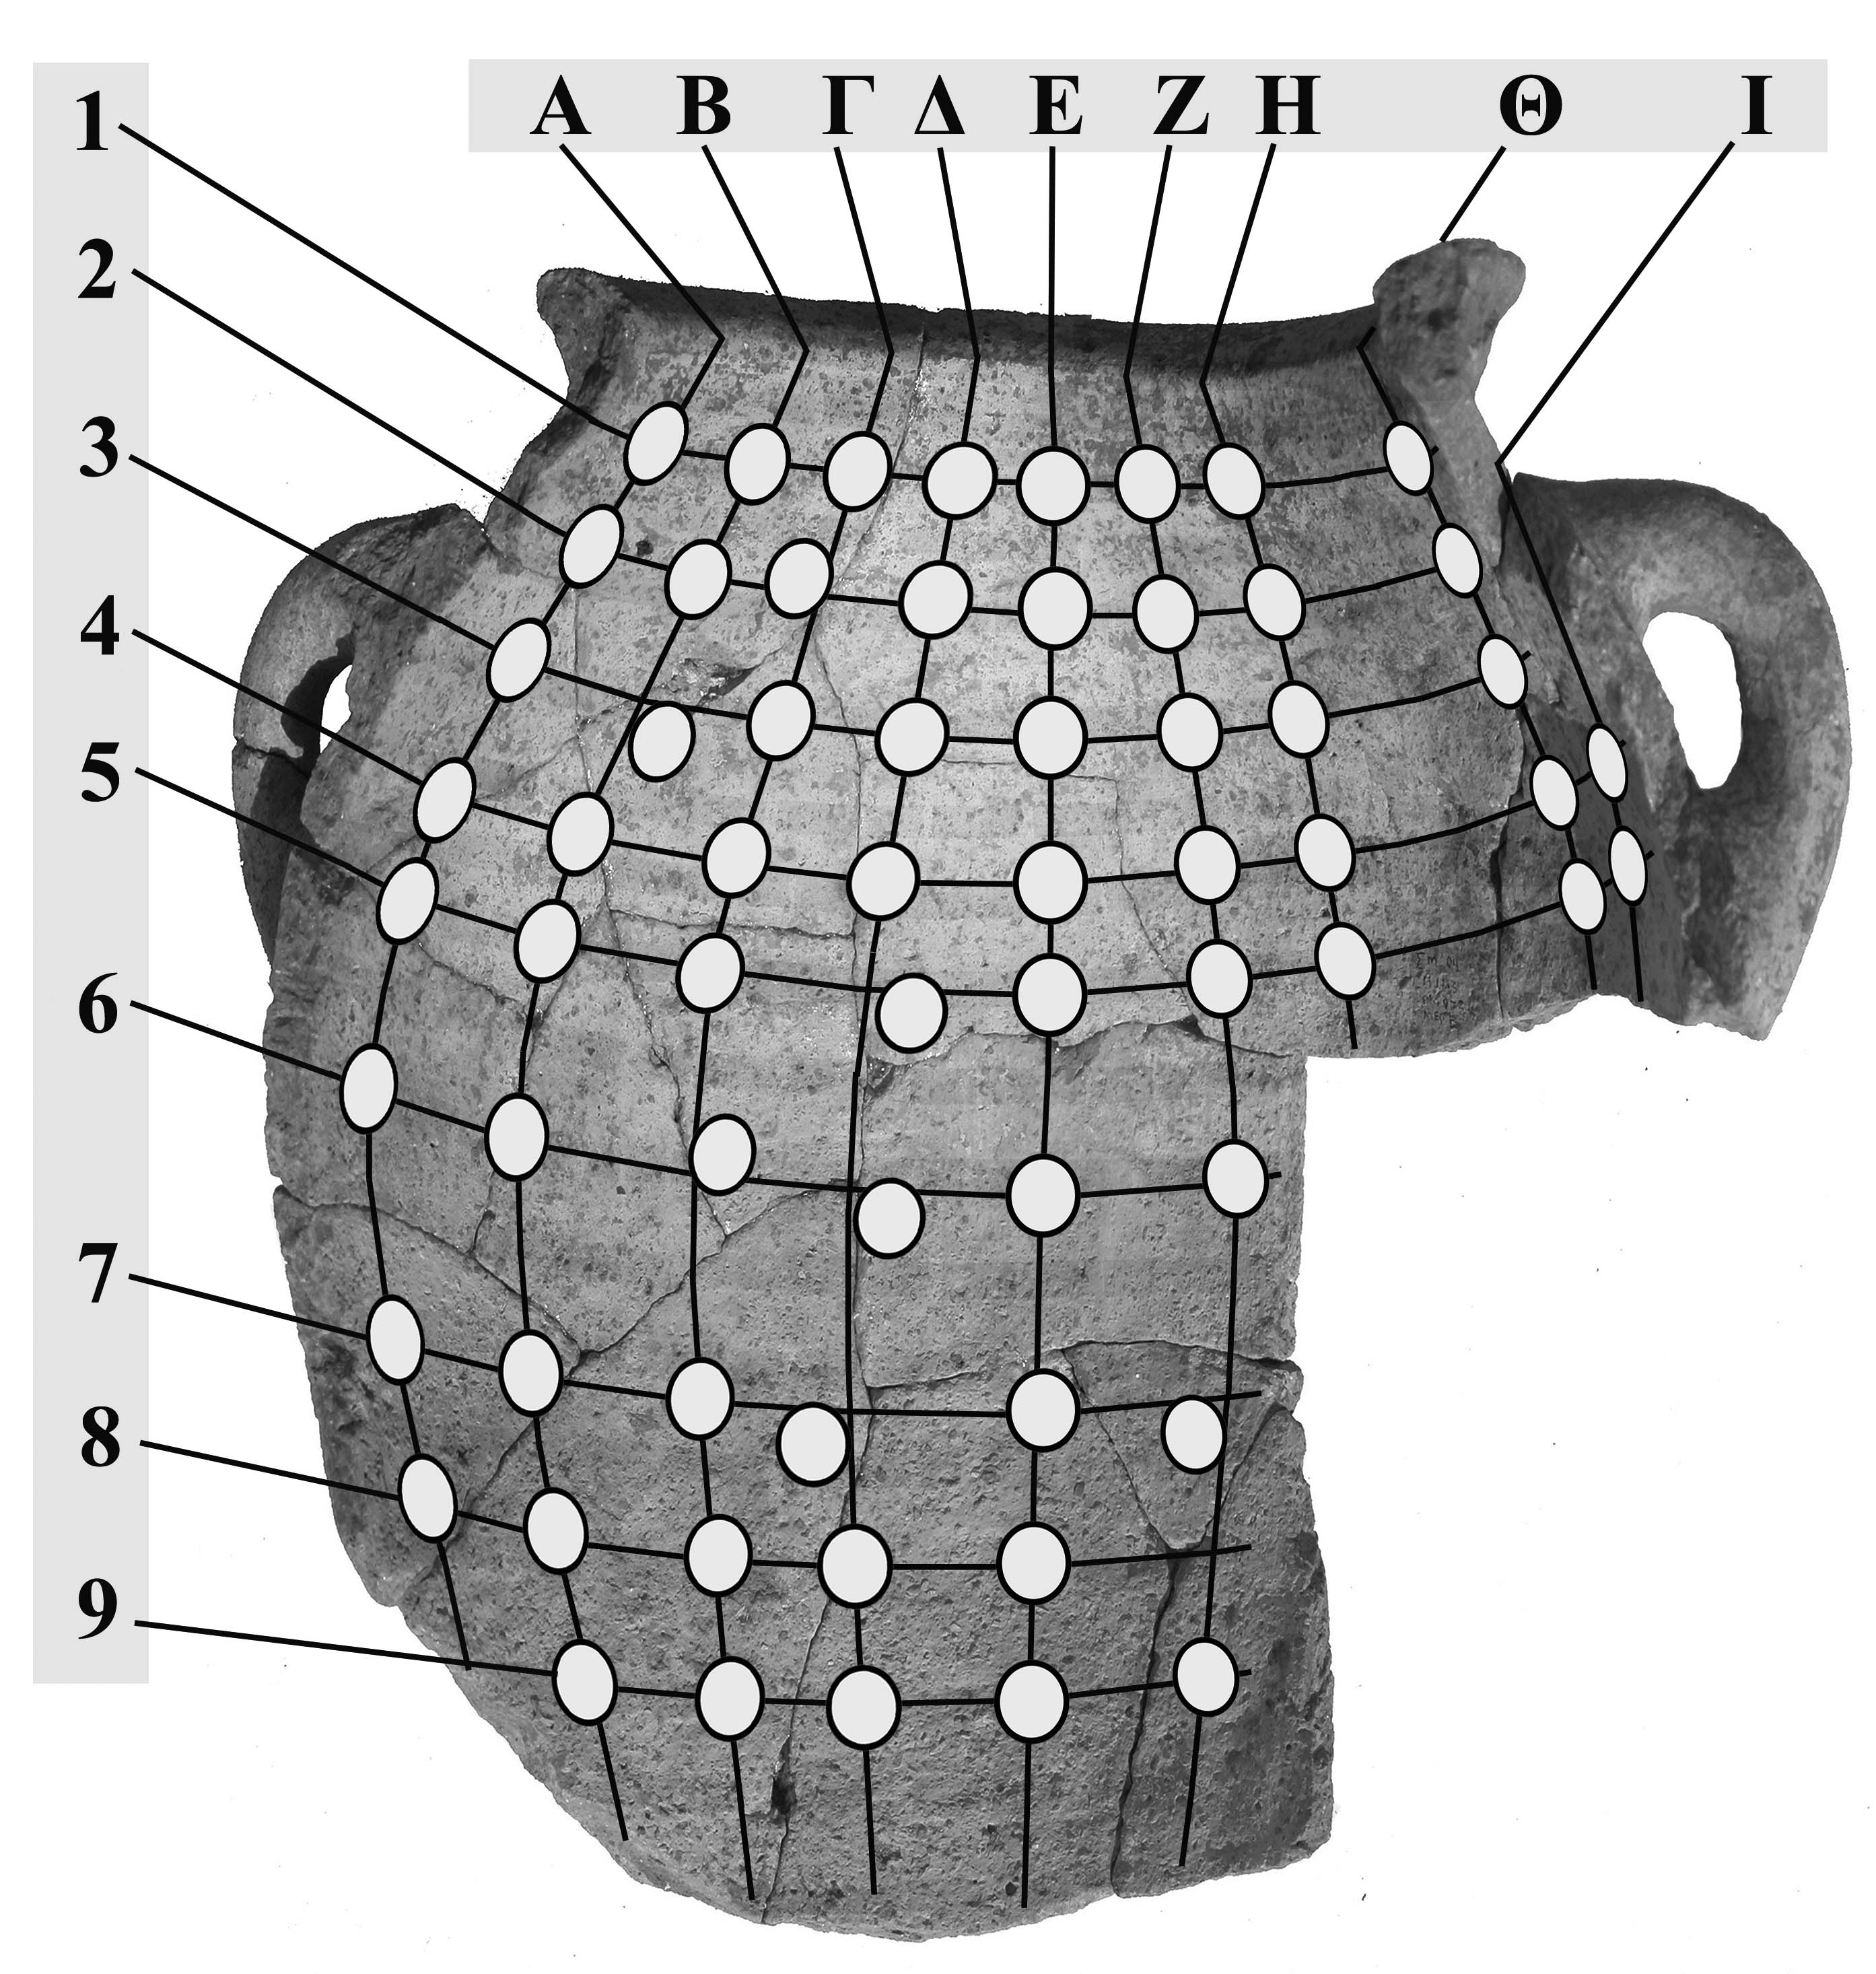
**

| **Vase 1** | |  | | | | | | | | |
| --- | --- | --- | --- | --- | --- | --- | --- | --- | --- | --- |
| 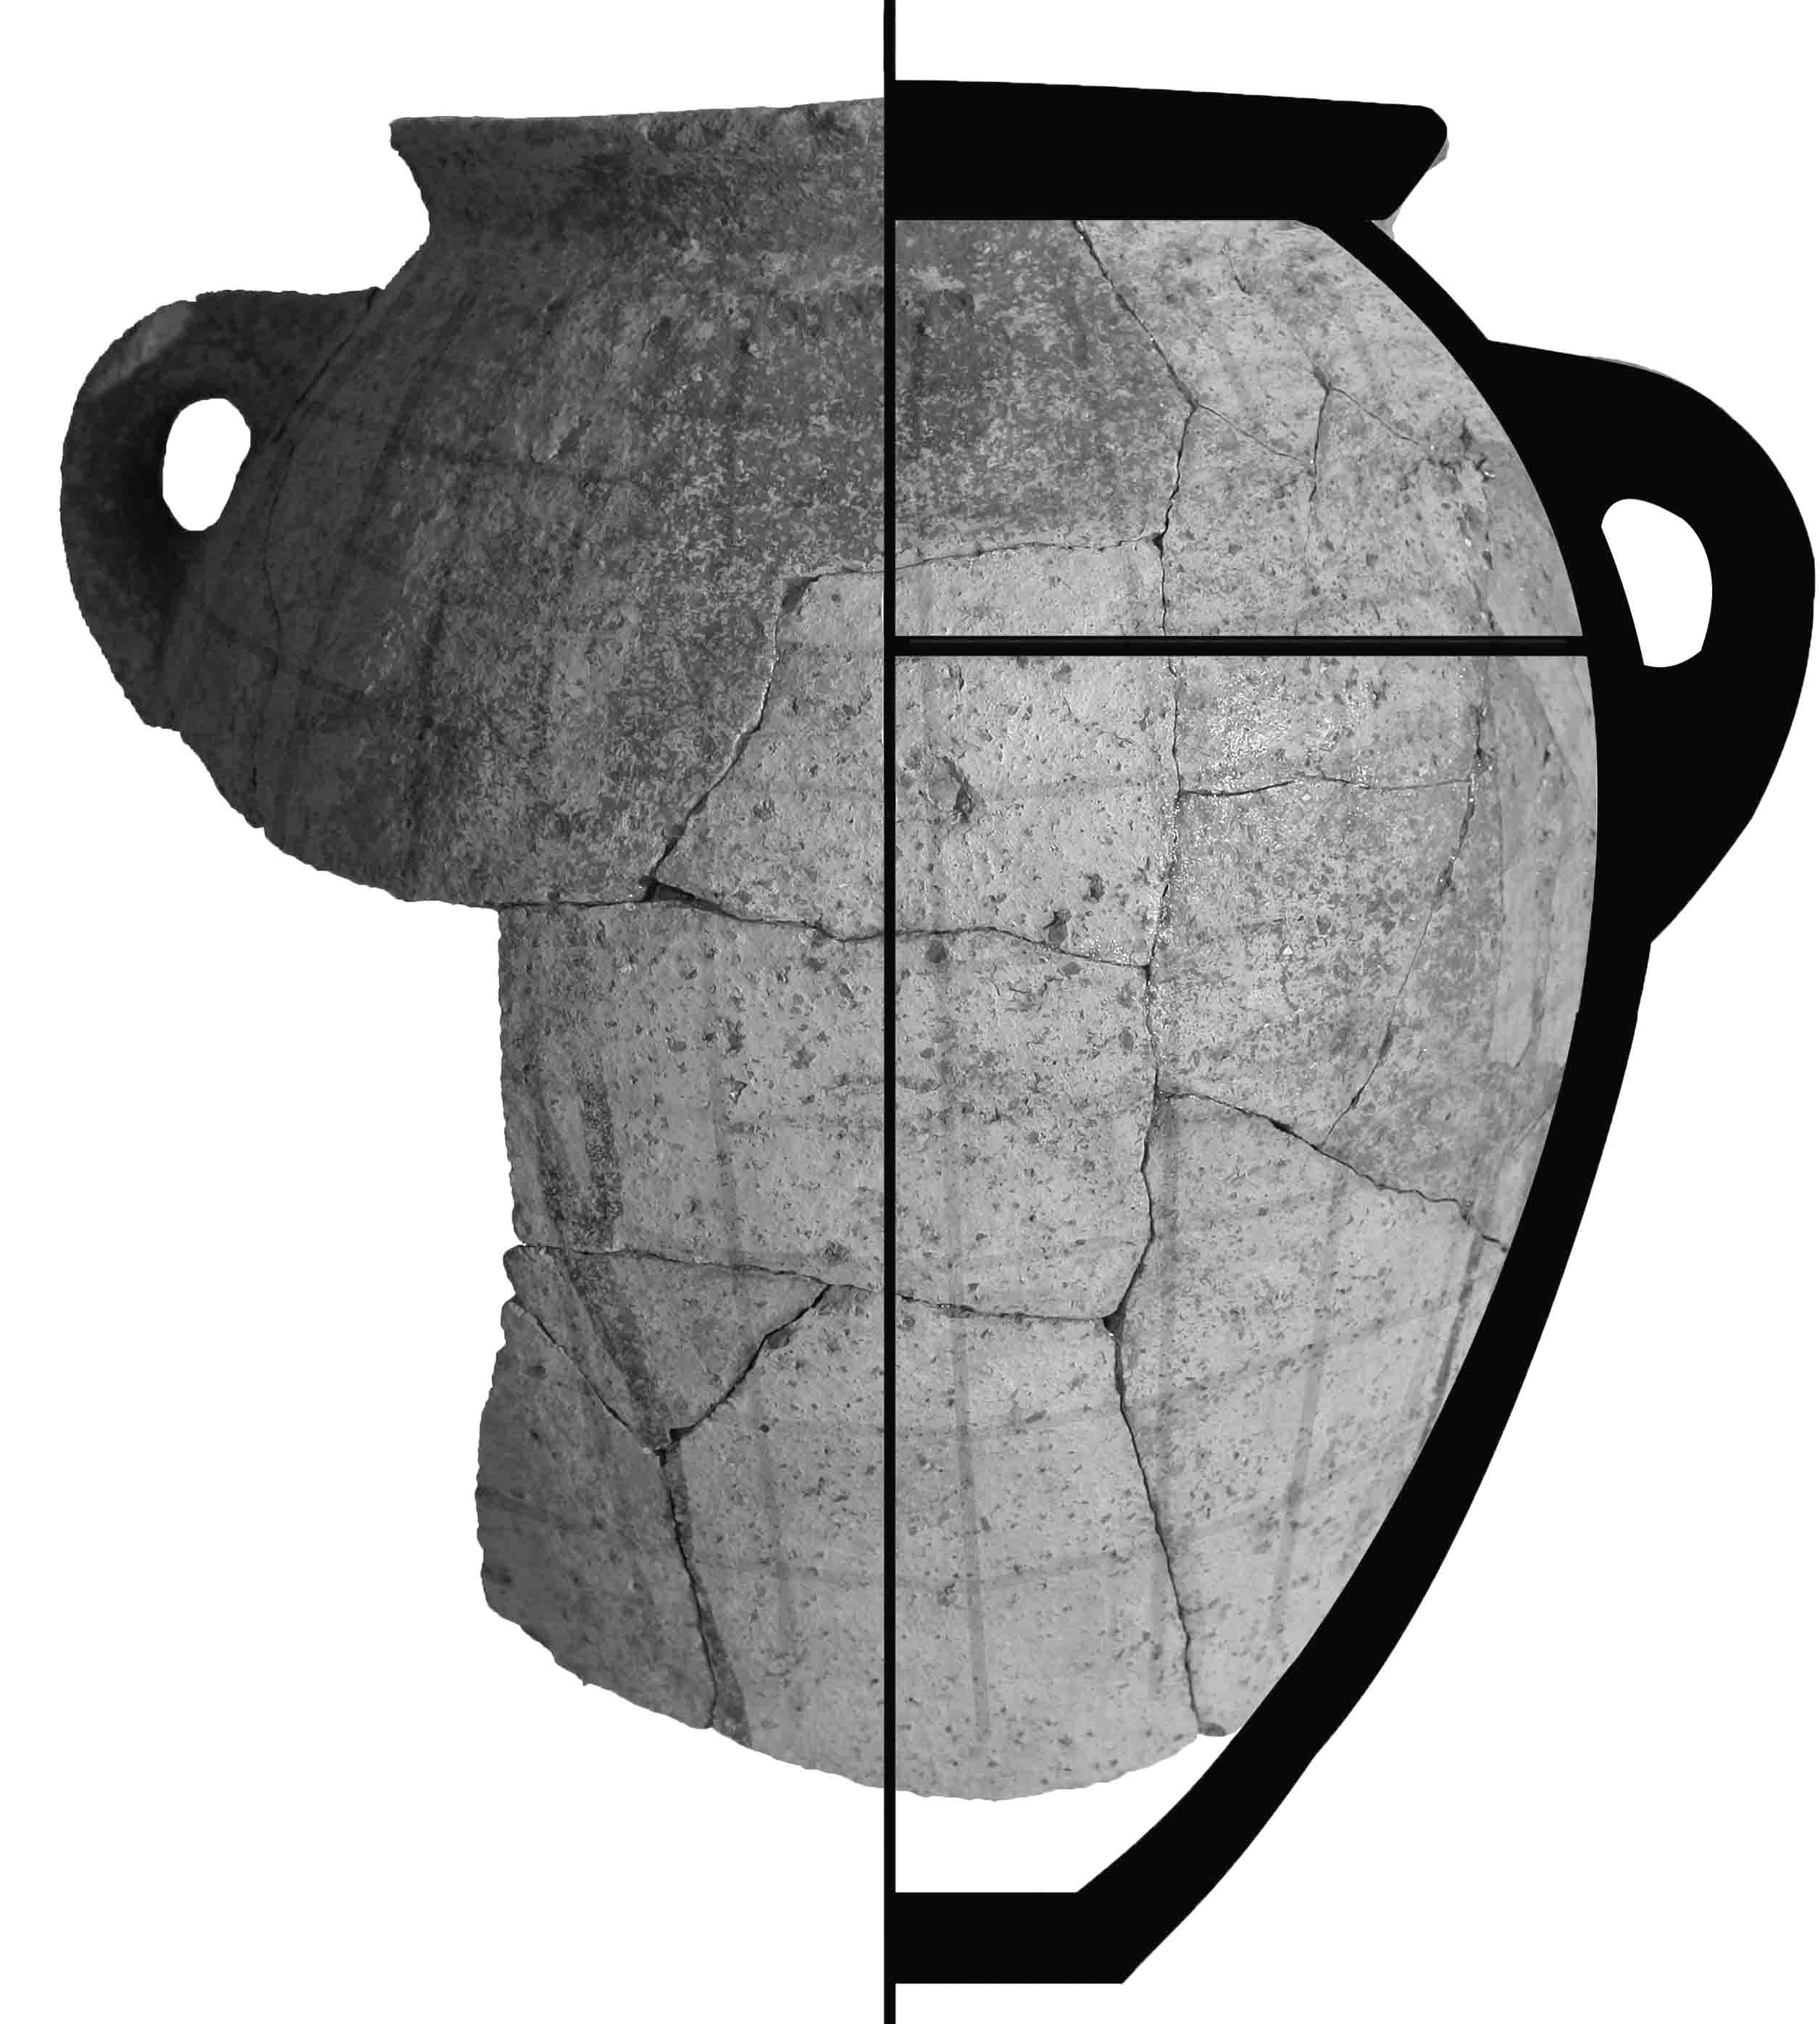 | |
|  | | | | | |  | | |
| **A** | **Β** | **Γ** | **Δ** | **Ε** | **Ζ** | **Η** | **Θ** | **Ι** |
| **1** | **Βy** (±1nΤ) | **23** | **32** | **32** | **35** | **31** | **29** | **25** | **7** |  |
| **Bx**(±1nΤ) | **47** | **33** | **18** | **-3** | **-19** | **-41** | **-57** | **-60** |
| **Bz**(±1nΤ) | **16** | **7** | **3** | **-1** | **5** | **8** | **23** | **51** |
| **B**(±1nΤ) | **55** | **46** | **37** | **35** | **37** | **51** | **66** | **79** |
| **θΒο** | **65±**1 | **47±**1 | **30±**2 | **5±**2 | **32±**2 | **55±**1 | **68±**1 | **85±**1 |
| **φΒο** | **19±**1 | **12±**2 | **9±**3 | **198±**18 | **165±**3 | **169±**1 | **158±**1 | **140±**1 |
| **2** | **Βy** (±1nΤ) | **22** | **30** | **34** | **34** | **34** | **30** | **23** | **5** |  |
| **Bx**(±1nΤ) | **60** | **29** | **18** | **-3** | **-22** | **-39** | **-57** | **-62** |
| **Bz**(±1nΤ) | **31** | **9** | **11** | **9** | **11** | **14** | **29** | **49** |
| **B**(±1nΤ) | **71** | **43** | **40** | **35** | **42** | **51** | **68** | **72** |
| **θΒο** | **72±**1 | **45±**1 | **32±**1 | **16±**2 | **36±**1 | **54±**1 | **70±**1 | **86±**1 |
| **φΒο** | **27±**1 | **17±**2 | **31±**3 | **108±**6 | **153±**2 | **160±**1 | **153±**1 | **142±**1 |
| **3** | **Βy** (±1nΤ) | **20** | **32** | **36** | **35** | **32** | **28** | **17** | **3** |  |
| **Bx**(±1nΤ) | **62** | **31** | **13** | **-3** | **-20** | **-47** | **-60** | **-62** |
| **Bz**(±1nΤ) | **40** | **25** | **17** | **17** | **21** | **29** | **38** | **47** |
| **B**(±1nΤ) | **76** | **51** | **42** | **39** | **43** | **62** | **73** | **78** |
| **θΒο** | **75±**1 | **51±**1 | **31±**1 | **26±**1 | **42±**1 | **63±**1 | **77±**1 | **88±**1 |
| **φΒο** | **33±**1 | **39±**1 | **53±**3 | **100±**3 | **134±**2 | **148±**1 | **148±**1 | **143±**1 |
| **4** | **Βy** (±1nΤ) | **17** | **24** | **32** | **32** | **33** | **25** | **19** | **-6** | **-9** |
| **Bx**(±1nΤ) | **59** | **41** | **19** | **-2** | **-21** | **-40** | **-58** | **-63** | **-56** |
| **Bz**(±1nΤ) | **42** | **37** | **30** | **33** | **29** | **31** | **40** | **51** | **50** |
| **B**(±1nΤ) | **74** | **60** | **48** | **46** | **49** | **56** | **73** | **81** | **76** |
| **θΒο** | **77±**1 | **67±**1 | **48±**1 | **46±**1 | **47±**1 | **64±**1 | **75±**1 | **-86±**1 | **-83±**1 |
| **φΒο** | **35±**1 | **42±**1 | **58±**2 | **93±**2 | **126±**2 | **142±**1 | **145±**1 | **141±**1 | **139±**1 |
| **5** | **Βy** (±1nΤ) | **15** | **23** | **32** | **32** | **32** | **22** | **15** | **-6** | **-10** |
| **Bx**(±1nΤ) | **54** | **48** | **21** | **-7** | **-21** | **-48** | **-58** | **-68** | **-61** |
| **Bz**(±1nΤ) | **41** | **47** | **40** | **35** | **41** | **42** | **47** | **52** | **51** |
| **B**(±1nΤ) | **69** | **71** | **55** | **48** | **56** | **67** | **76** | **86** | **80** |
| **θΒο** | **78±**1 | **71±**1 | **55±**1 | **48±**1 | **55±**1 | **71±**1 | **79±**1 | **-86±**1 | **-83±**1 |
| **φΒο** | **37±**1 | **44±**1 | **62±**1 | **101±**1 | **117±**1 | **139±**1 | **141±**1 | **143±**1 | **140±**1 |

**Table 6a.** *Sensor readings of Bi (i=x,y,z), with the x-sensor oriented in the grooves’ direction on the body fragments of* ***vase 1.***


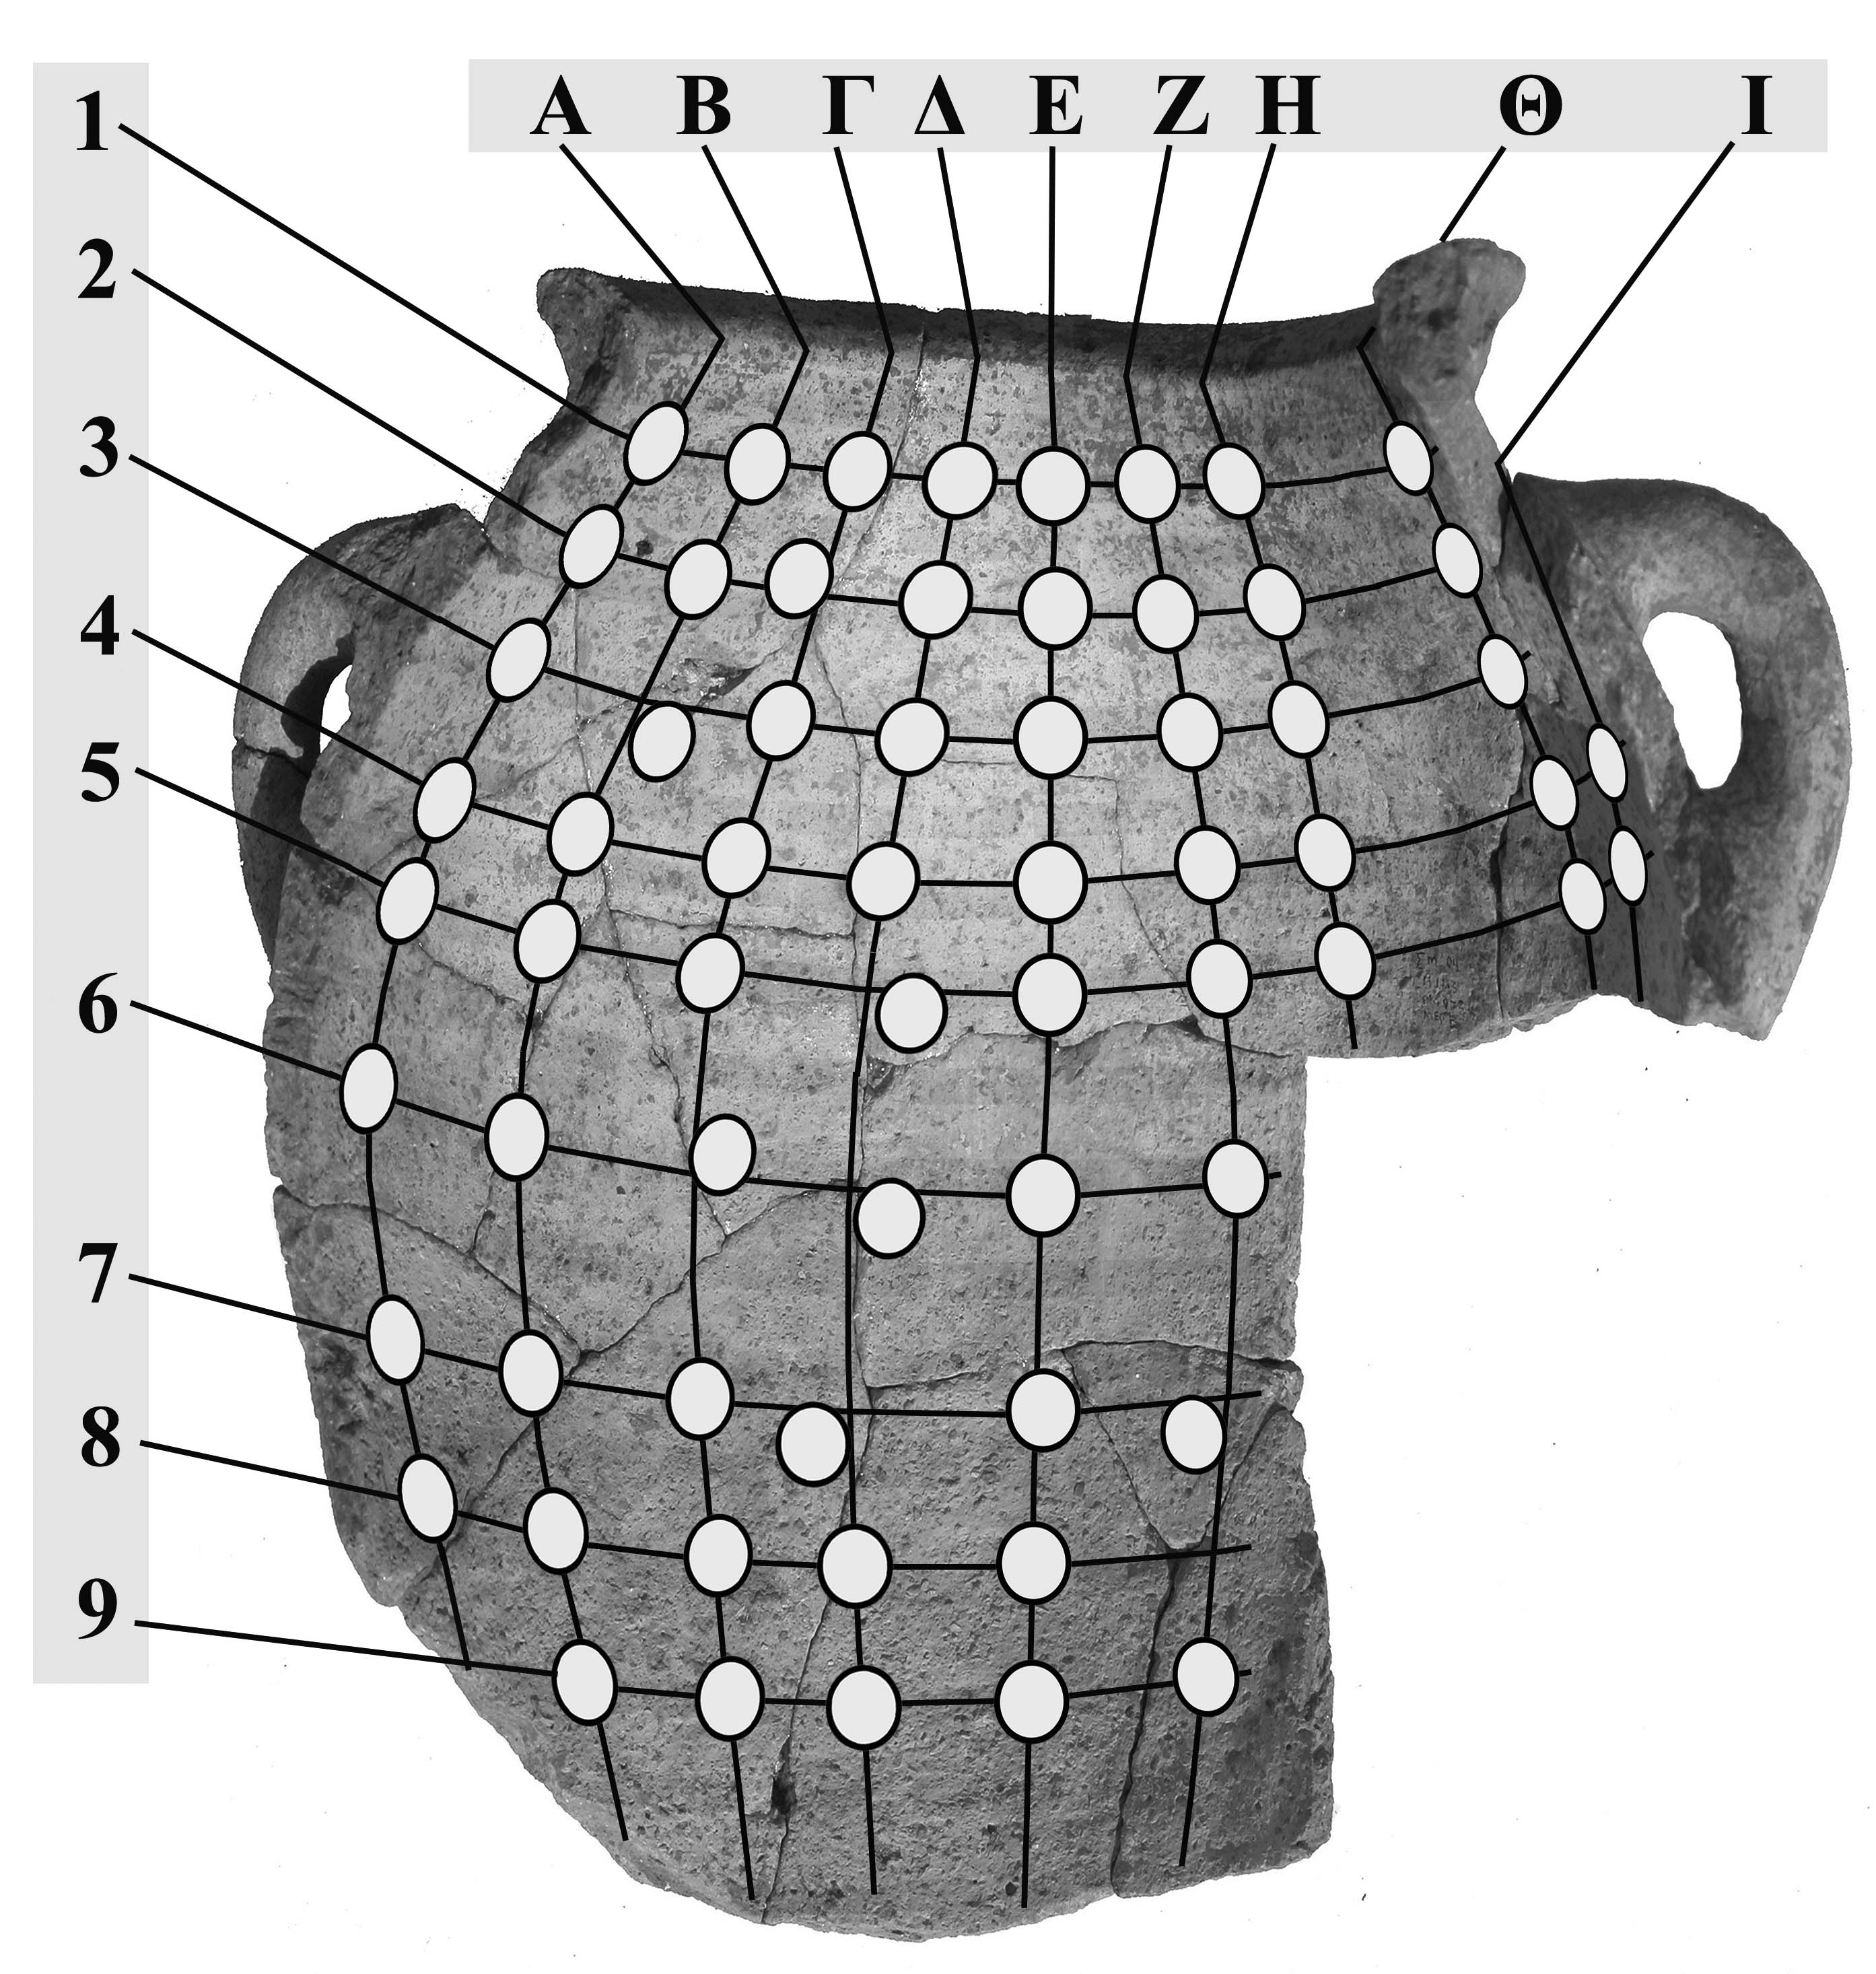


| **Vase 1** | |  | | | | | | | | |
| --- | --- | --- | --- | --- | --- | --- | --- | --- | --- | --- |
| 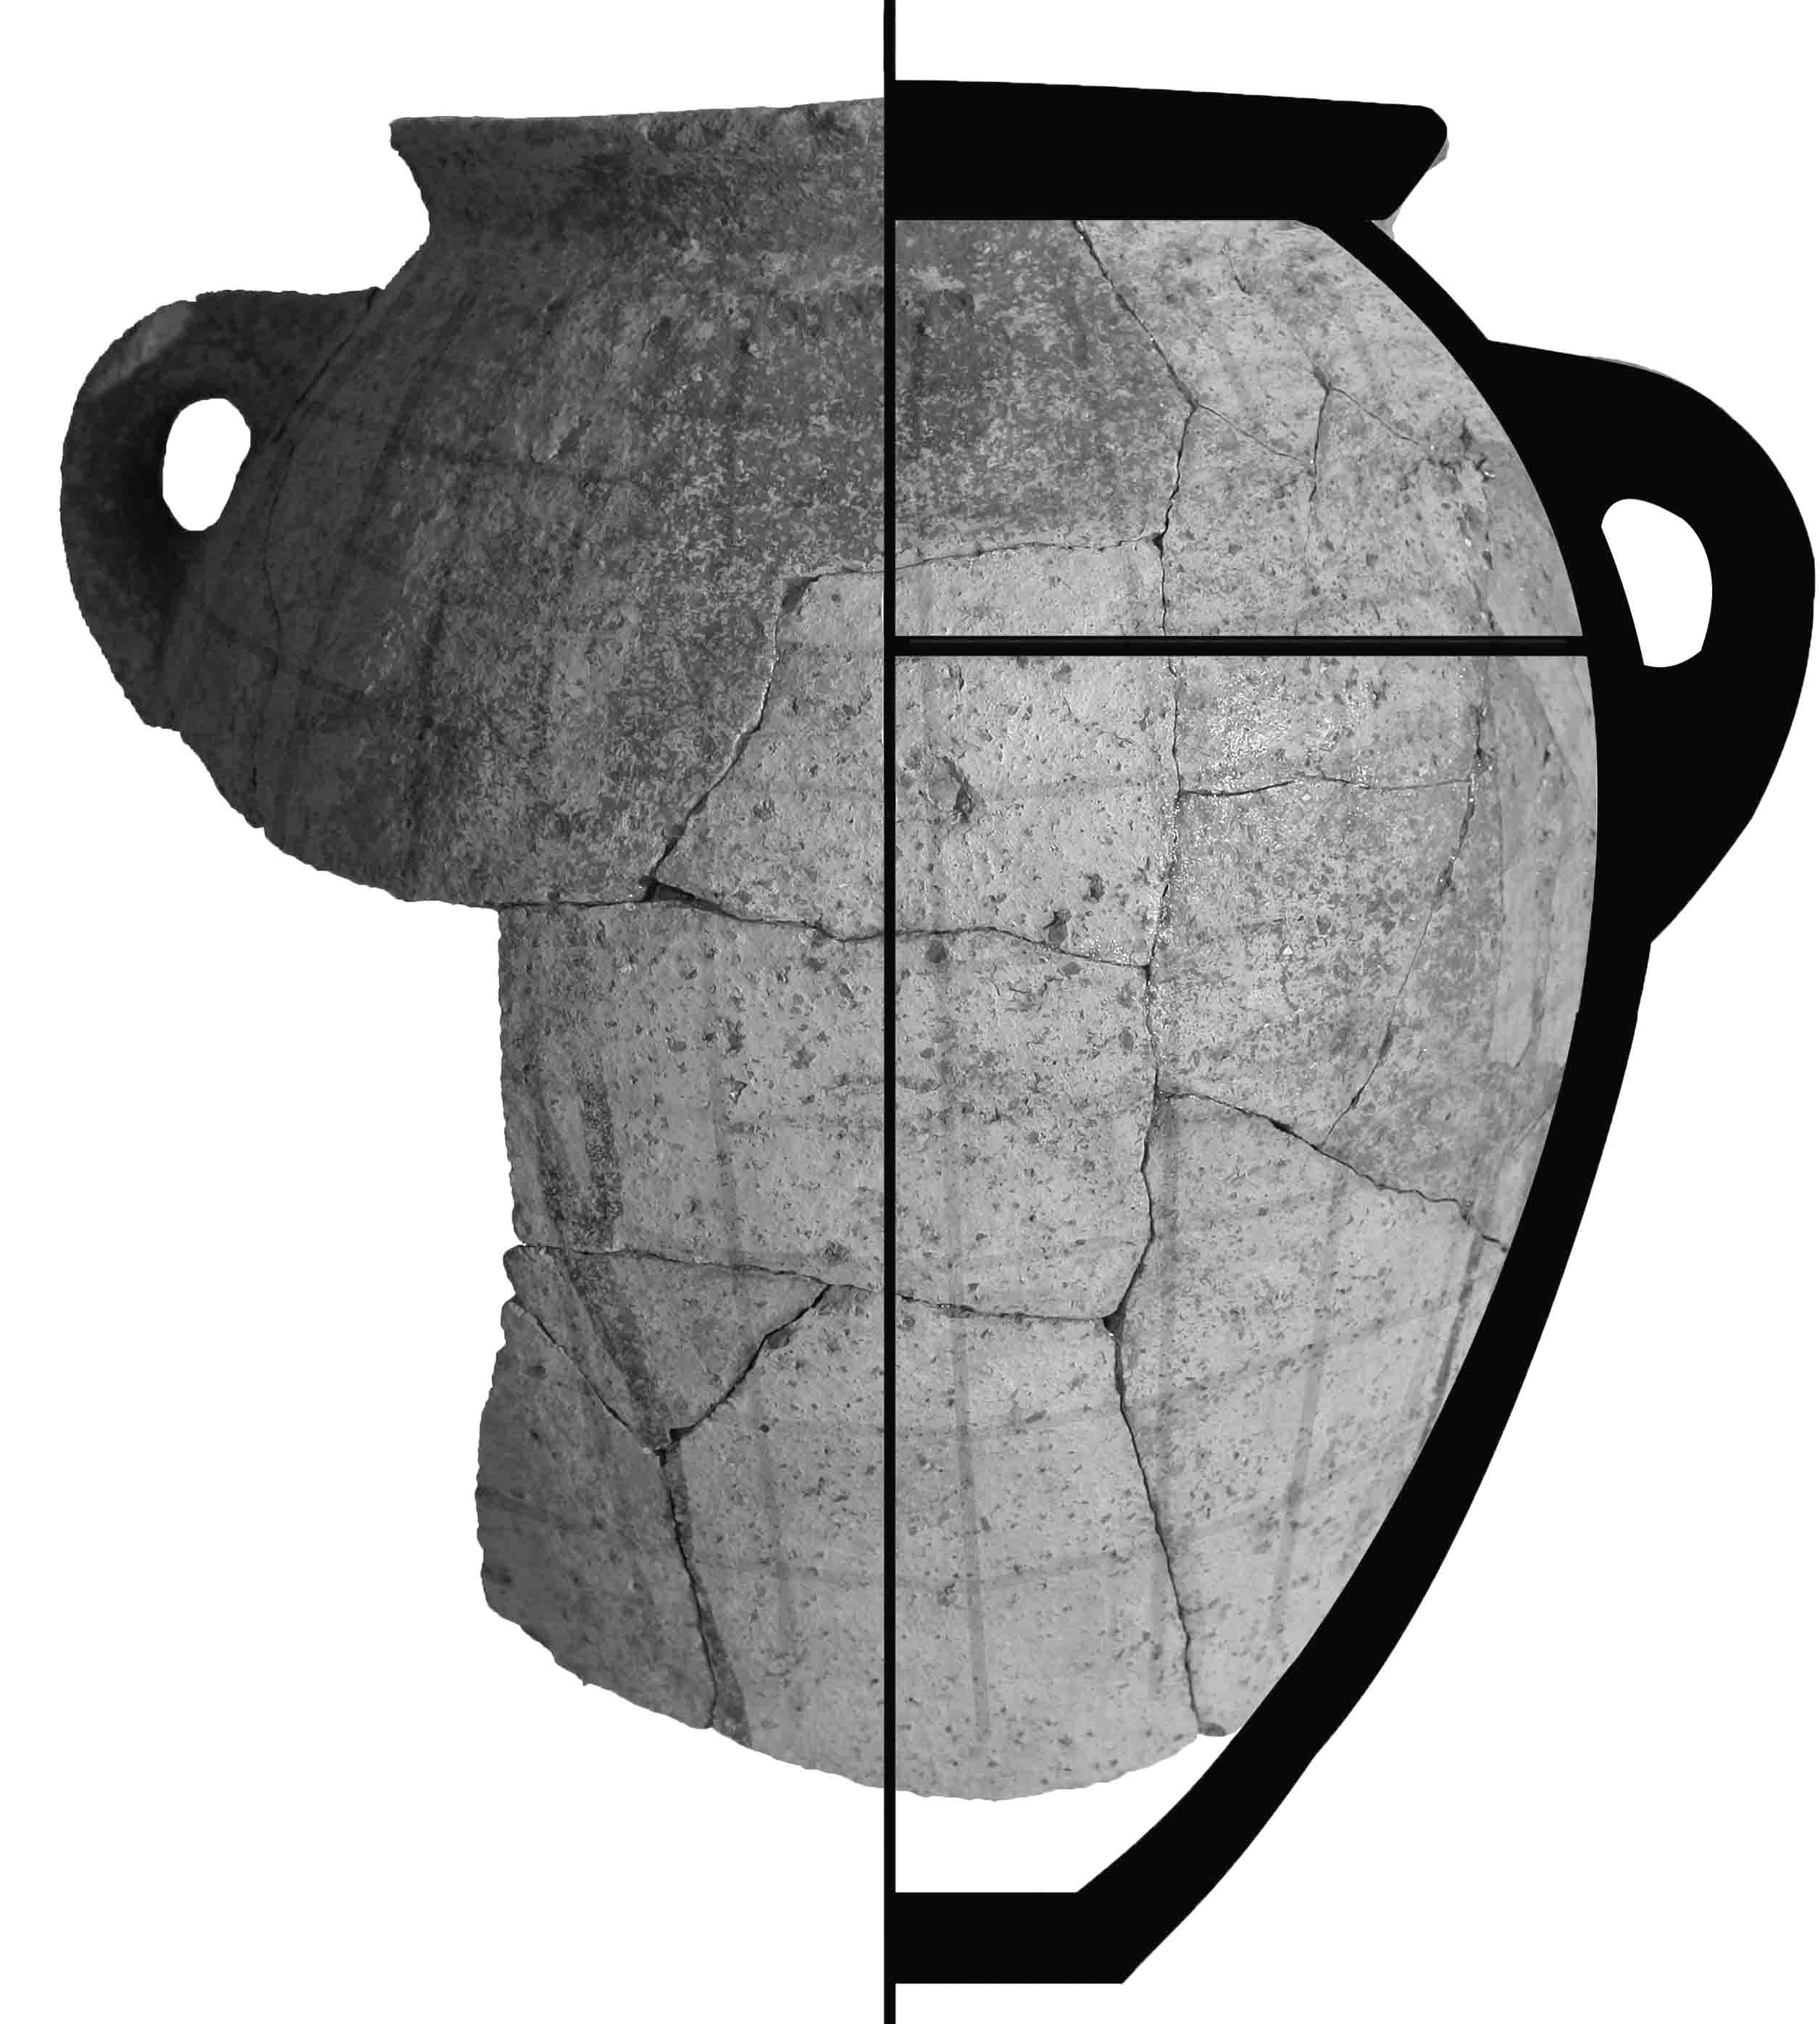 | |
| **A** | **Β** | Γ | Δ | Ε | Ζ | **Η** | **Θ** | **Ι** |
| **6** | **Βy** (±1nΤ) | **11** | **18** | **26** | **27** | **22** | **14** |  |  |  |
| **Bx**(±1nΤ) | **55** | **42** | **21** | **-1** | **-28** | **-48** |
| **Bz**(±1nΤ) | **51** | **57** | **54** | **56** | **60** | **53** |
| **B**(±1nΤ) | **76** | **76** | **64** | **62** | **70** | **73** |
| **θΒο** | **82±**1 | **76±**1 | **66±**1 | **64±**1 | **72±**1 | **79±**1 |
| **φΒο** | **43±**1 | **54±**1 | **69±**1 | **91±**1 | **115±**1 | **132±**1 |
| **7** | **Βy** (±1nΤ) | **2** | **12** | **18** | **21** | **20** | **8** |  |  |  |
| **Bx**(±1nΤ) | **65** | **48** | **20** | **-5** | **-25** | **-52** |
| **Bz**(±1nΤ) | **57** | **63** | **63** | **61** | **61** | **61** |
| **B**(±1nΤ) | **86** | **81** | **69** | **65** | **69** | **84** |
| **θΒο** | **89±**1 | **81±**1 | **75±**1 | **71±**1 | **73±**1 | **84±**1 |
| **φΒο** | **41±**1 | **53±**1 | **72±**1 | **95±**1 | **112±**1 | **130±**1 |
| **8** | **Βy** (±1nΤ) | **1** | **12** | **16** | **18** | **18** | **9** |  |  |  |
| **Bx**(±1nΤ) | **62** | **47** | **20** | **1** | **-27** | **-50** |
| **Bz**(±1nΤ) | **56** | **71** | **67** | **74** | **71** | **65** |
| **B**(±1nΤ) | **84** | **82** | **72** | **76** | **78** | **82** |
| **θΒο** | **89±**1 | **82±**1 | **77±**1 | **76±**1 | **77±**1 | **84±**1 |
| **φΒο** | **42±**1 | **56±**1 | **73±**1 | **89±**1 | **111±**1 | **128±**1 |
| **9** | **Βy** (±1nΤ) |  | **6** | **14** | **16** | **15** | **4** |  |  |  |
| **Bx**(±1nΤ) | **44** | **27** | **-4** | **-29** | **-51** |
| **Bz**(±1nΤ) | **64** | **72** | **75** | **72** | **66** |
| **B**(±1nΤ) | **86** | **78** | **77** | **79** | **84** |
| **θΒο** | **86±**1 | **80±**1 | **78±**1 | **79±**1 | **87±**1 |
| **φΒο** | **55±**1 | **71±**1 | **93±**1 | **112±**1 | **128±**1 |

**Table 6b.** *Indicative sensor readings of Bi (i=x,y,z), with the x-sensor oriented in the grooves’ direction on the body fragments of* ***vase 1.***


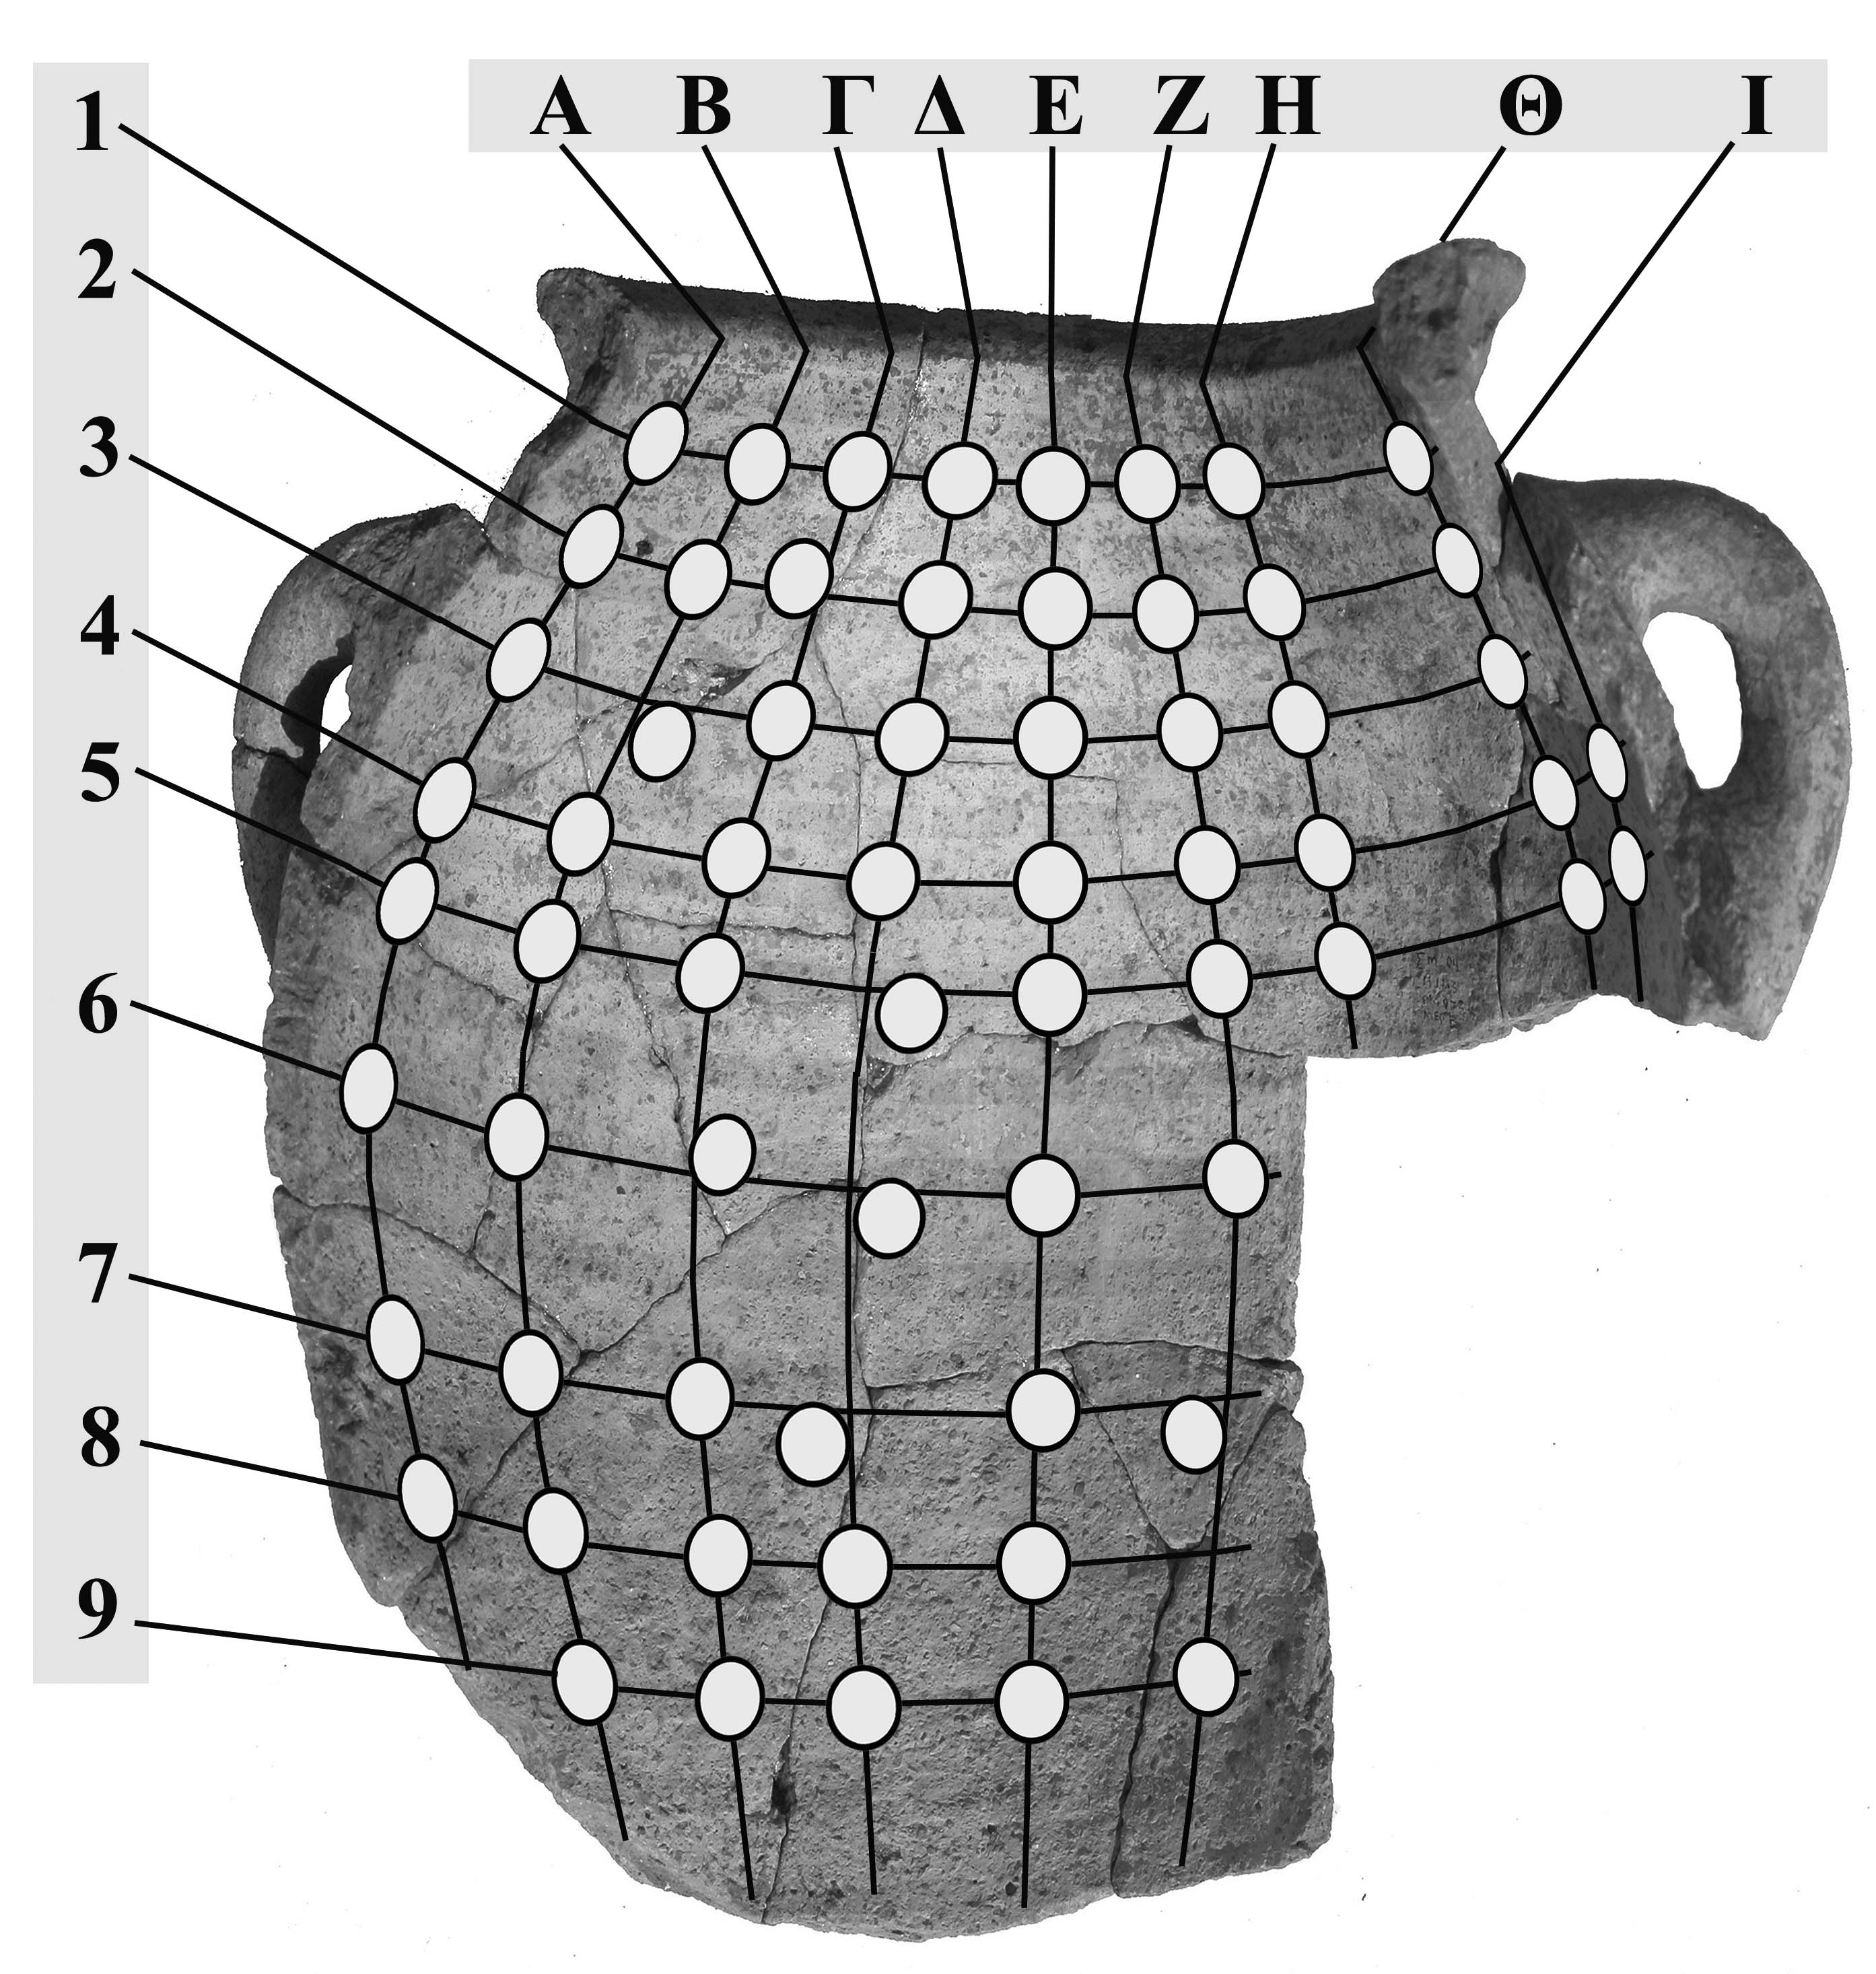


| **Vase 2** | |  | | | | | | **αy˪**(cm) | **αx,z//**  (cm) | **λ** |
| --- | --- | --- | --- | --- | --- | --- | --- | --- | --- | --- |
| 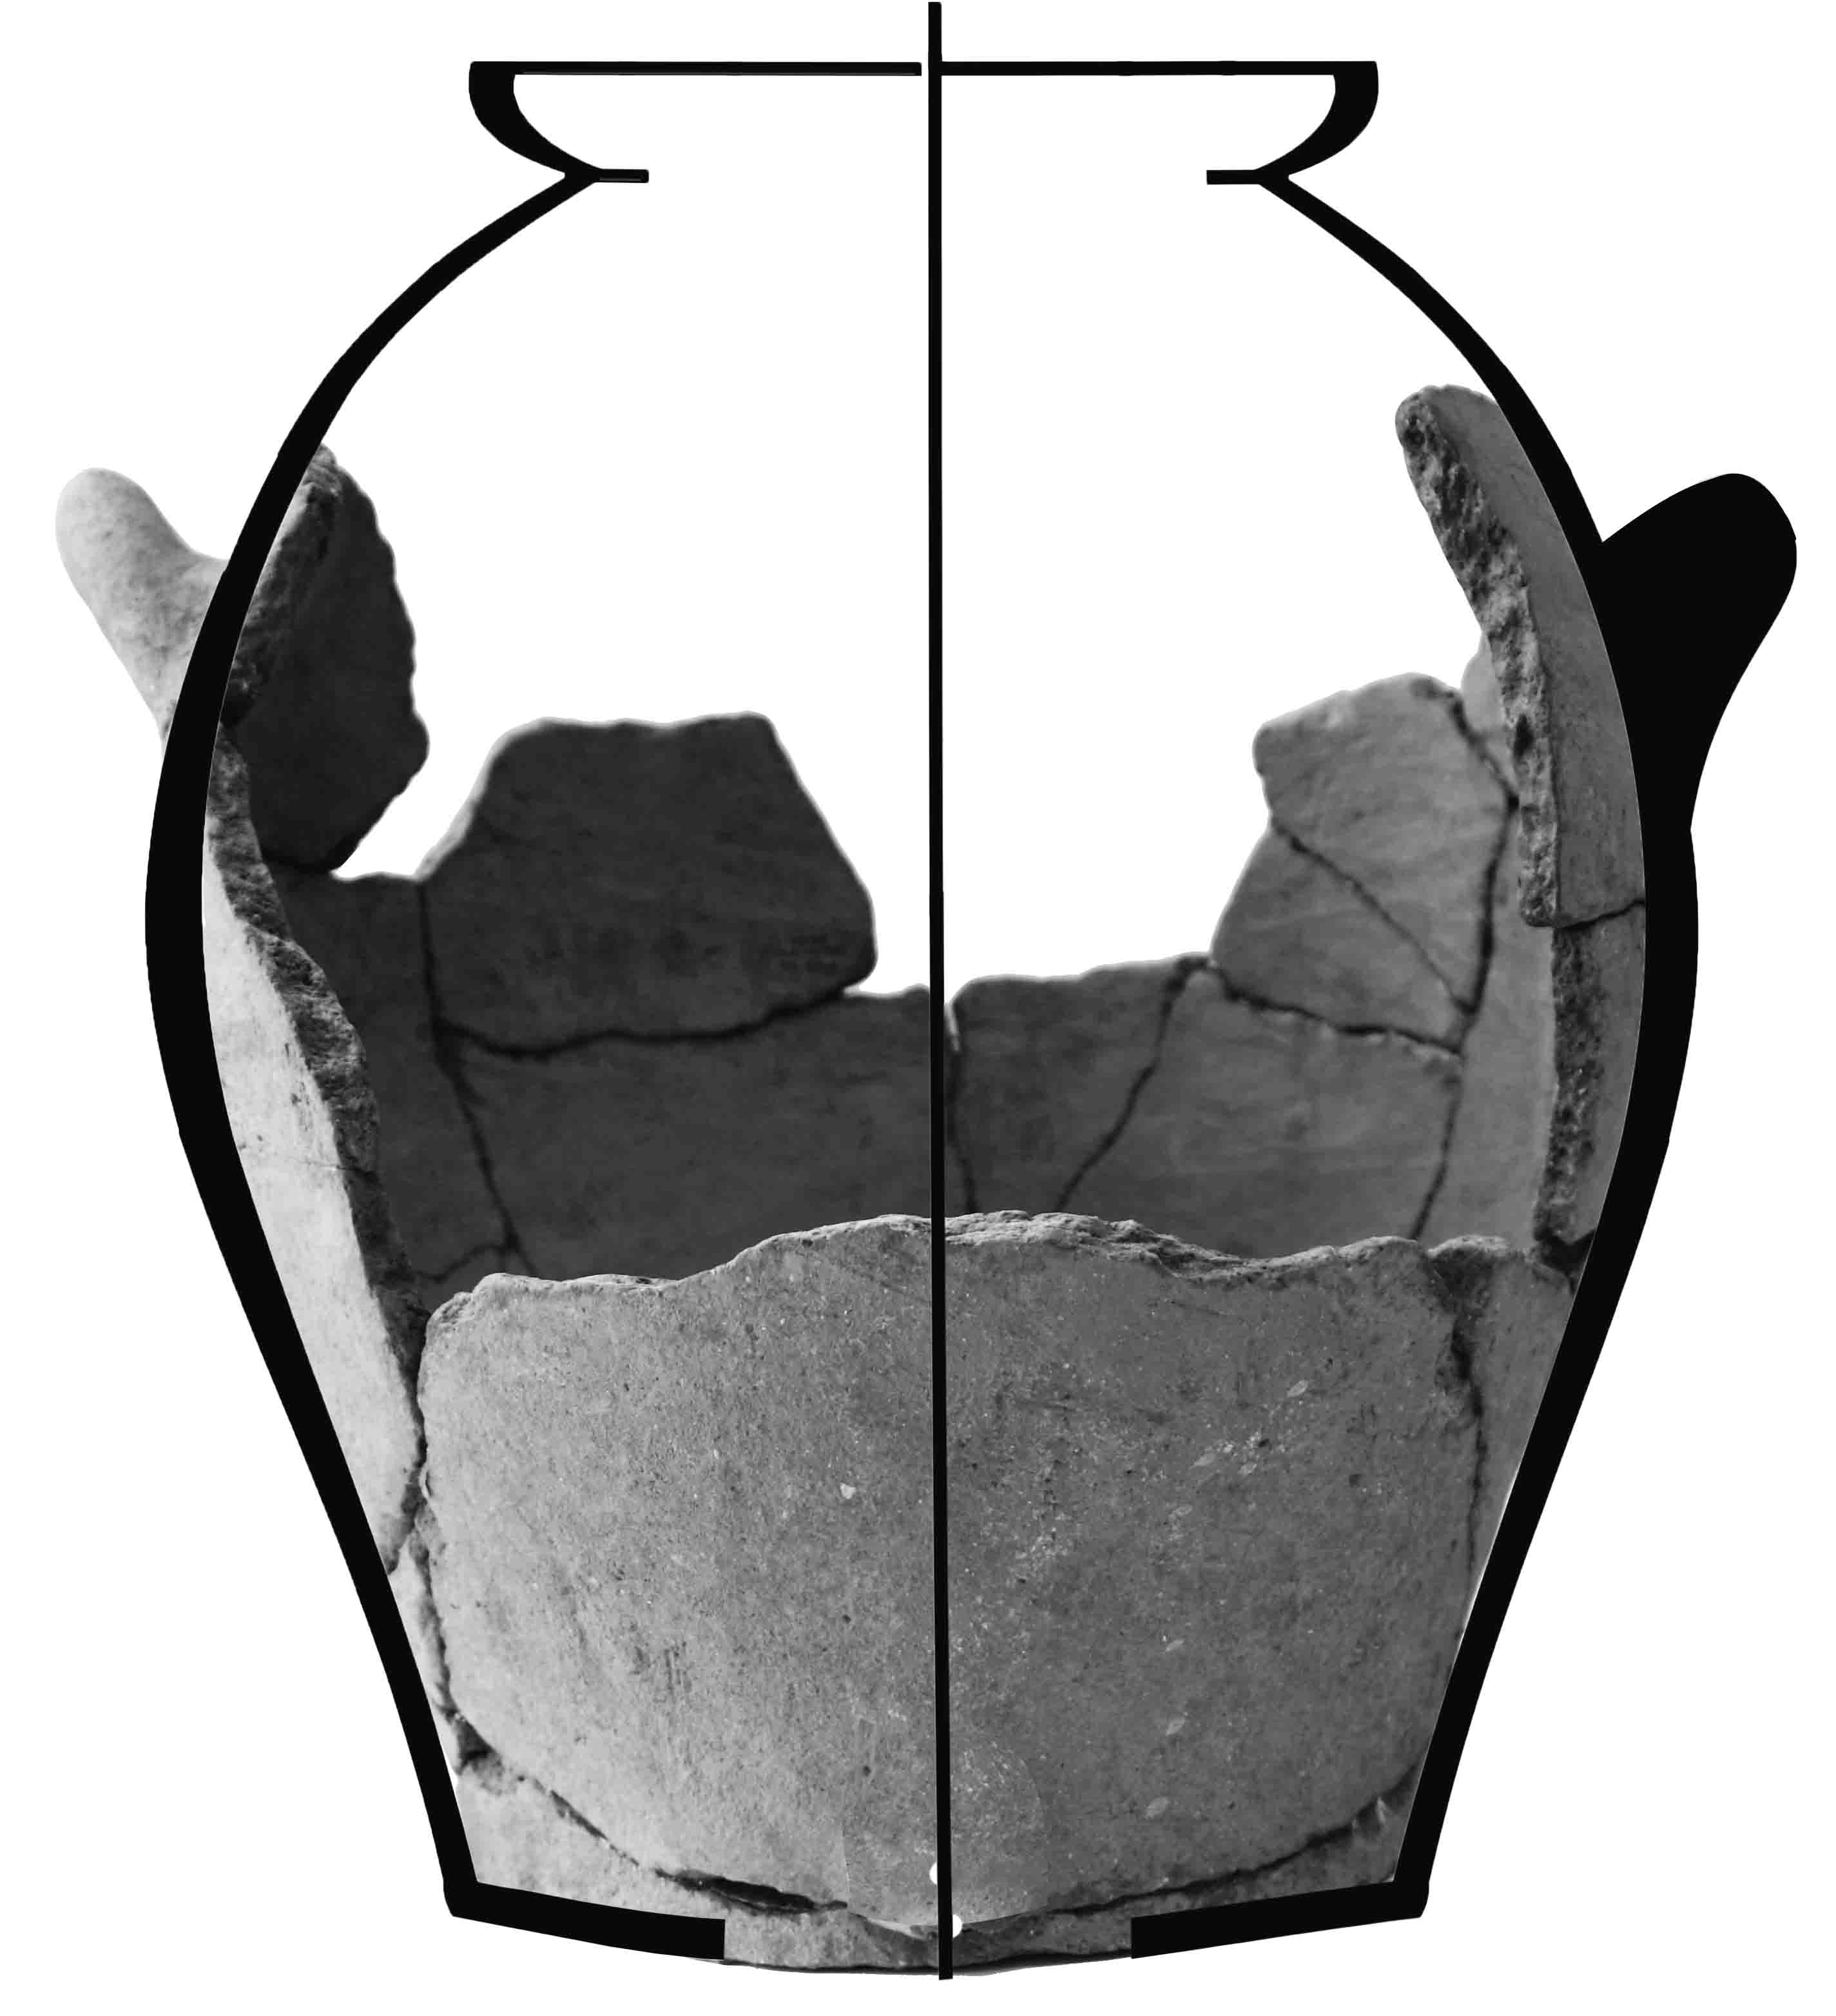 | |
| **1,15±**  0,053 | **1,66±**  **0,05** | **2,0±0,1** |
|  | | |
| **A** | **Β** | **Γ** | **Δ** | **Ε** | **Ζ** | **Η** | **Θ** | **Ι** |
| **1** | **D** (±0.3) cm |  |  |  |  |  | **5.7** | **2.5** | **3.4** |  |
| **L** (±0.1) cm | **0.9** | **0.8** | **0.8** |
| **Bxz** (±1)nT | **21** | **16** | **28** |
| **By** (±1)nT | **37** | **28** | **33** |
| **B**(±1)nT | **43** | **32** | **43** |
| **θΒο** | **30±1** | **30±2** | **40±1** |
| **2** | **D** (±0.3) cm |  |  |  |  |  | **9.3** |  |  | **2.0** |
| **L** (±0.1) cm | **1.0** | **1.1** |
| **Bxz** (±1)nT | **35** | **71** |
| **By** (±1)nT | **38** | **32** |
| **B**(±1)nT | **52** | **78** |
| **θΒο** | **43±1** | **66±1** |
| **3** | **D** (±0.3) cm |  |  |  |  |  | **13.1** | **11.9** | **10.6** | **3.7** |
| **L** (±0.1) cm | **1.2** | **1.3** | **1.1** | **1.2** |
| **Bxz** (±1)nT | **46** | **38** | **49** | **89** |
| **By** (±1)nT | **38** | **42** | **38** | **24** |
| **B**(±1)nT | **60** | **57** | **62** | **92** |
| **θΒο** | **50±1** | **42±1** | **52±1** | **75±1** |
| **4** | **D** (±0.3) cm |  |  |  |  |  | **2.8** | **2.6** | **6.4** | **1.7** |
| **L** (±0.1) cm | **1.5** | **1.6** | **1.5** | **1.5** |
| **Bxz** (±1)nT | **73** | **73** | **77** | **92** |
| **By** (±1)nT | **37** | **33** | **28** | **20** |
| **B**(±1)nT | **82** | **80** | **82** | **94** |
| **θΒο** | **63±1** | **66±1** | **70±1** | **78±1** |
| **5** | **D** (±0.3) cm |  |  |  |  |  | **6.7** | **2.6** | **10.4** | **2.3** |
| **L** (±0.1) cm | **1.6** | **1.6** | **1.4** | **1.3** |
| **Bxz** (±1)nT | **88** | **73** | **90** | **99** |
| **By** (±1)nT | **35** | **33** | **26** | **15** |
| **B**(±1)nT | **95** | **80** | **94** | **100** |
| **θΒο** | **68±1** | **66±1** | **74±1** | **81±1** |

**Table 7a**. *Measurements D, L, and sensor readings of Bi (i=xz,y), with the x-sensor aligned along the common direction of Bxz, Μxz, on the body fragments of* ***vase 2****.*


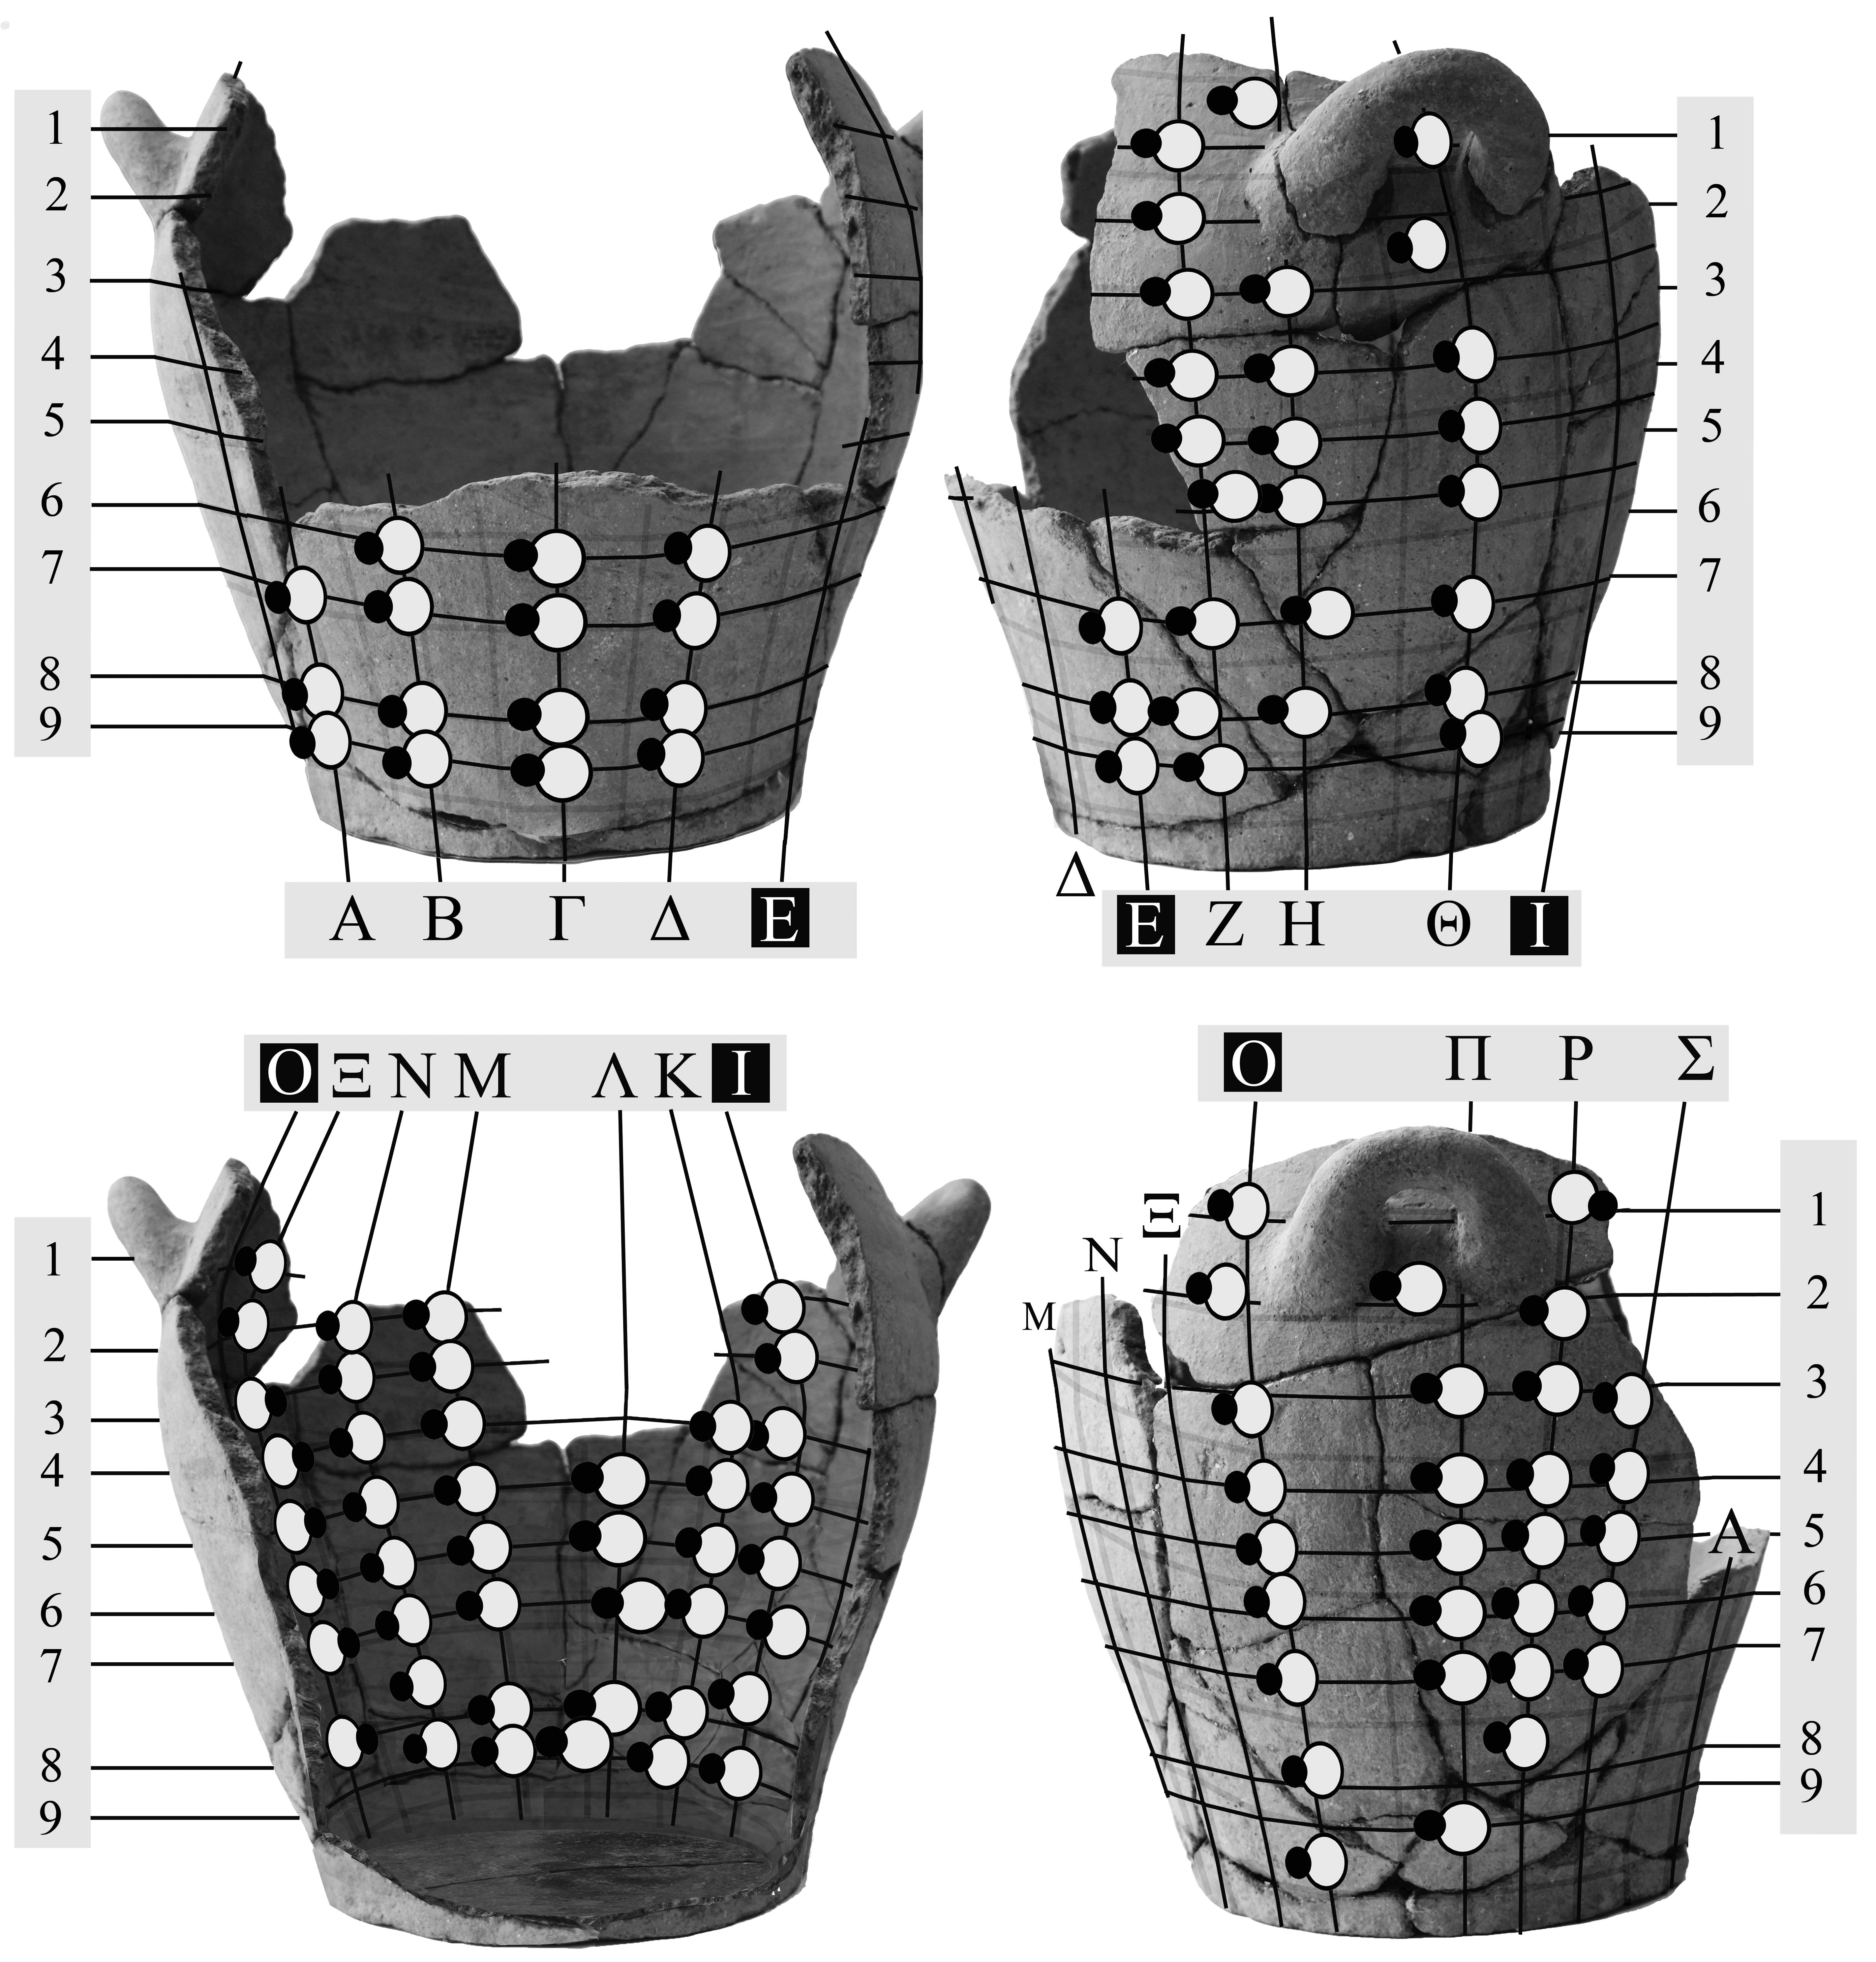


| **Vase 2** | | *.* | | | | | | | | |
| --- | --- | --- | --- | --- | --- | --- | --- | --- | --- | --- |
| **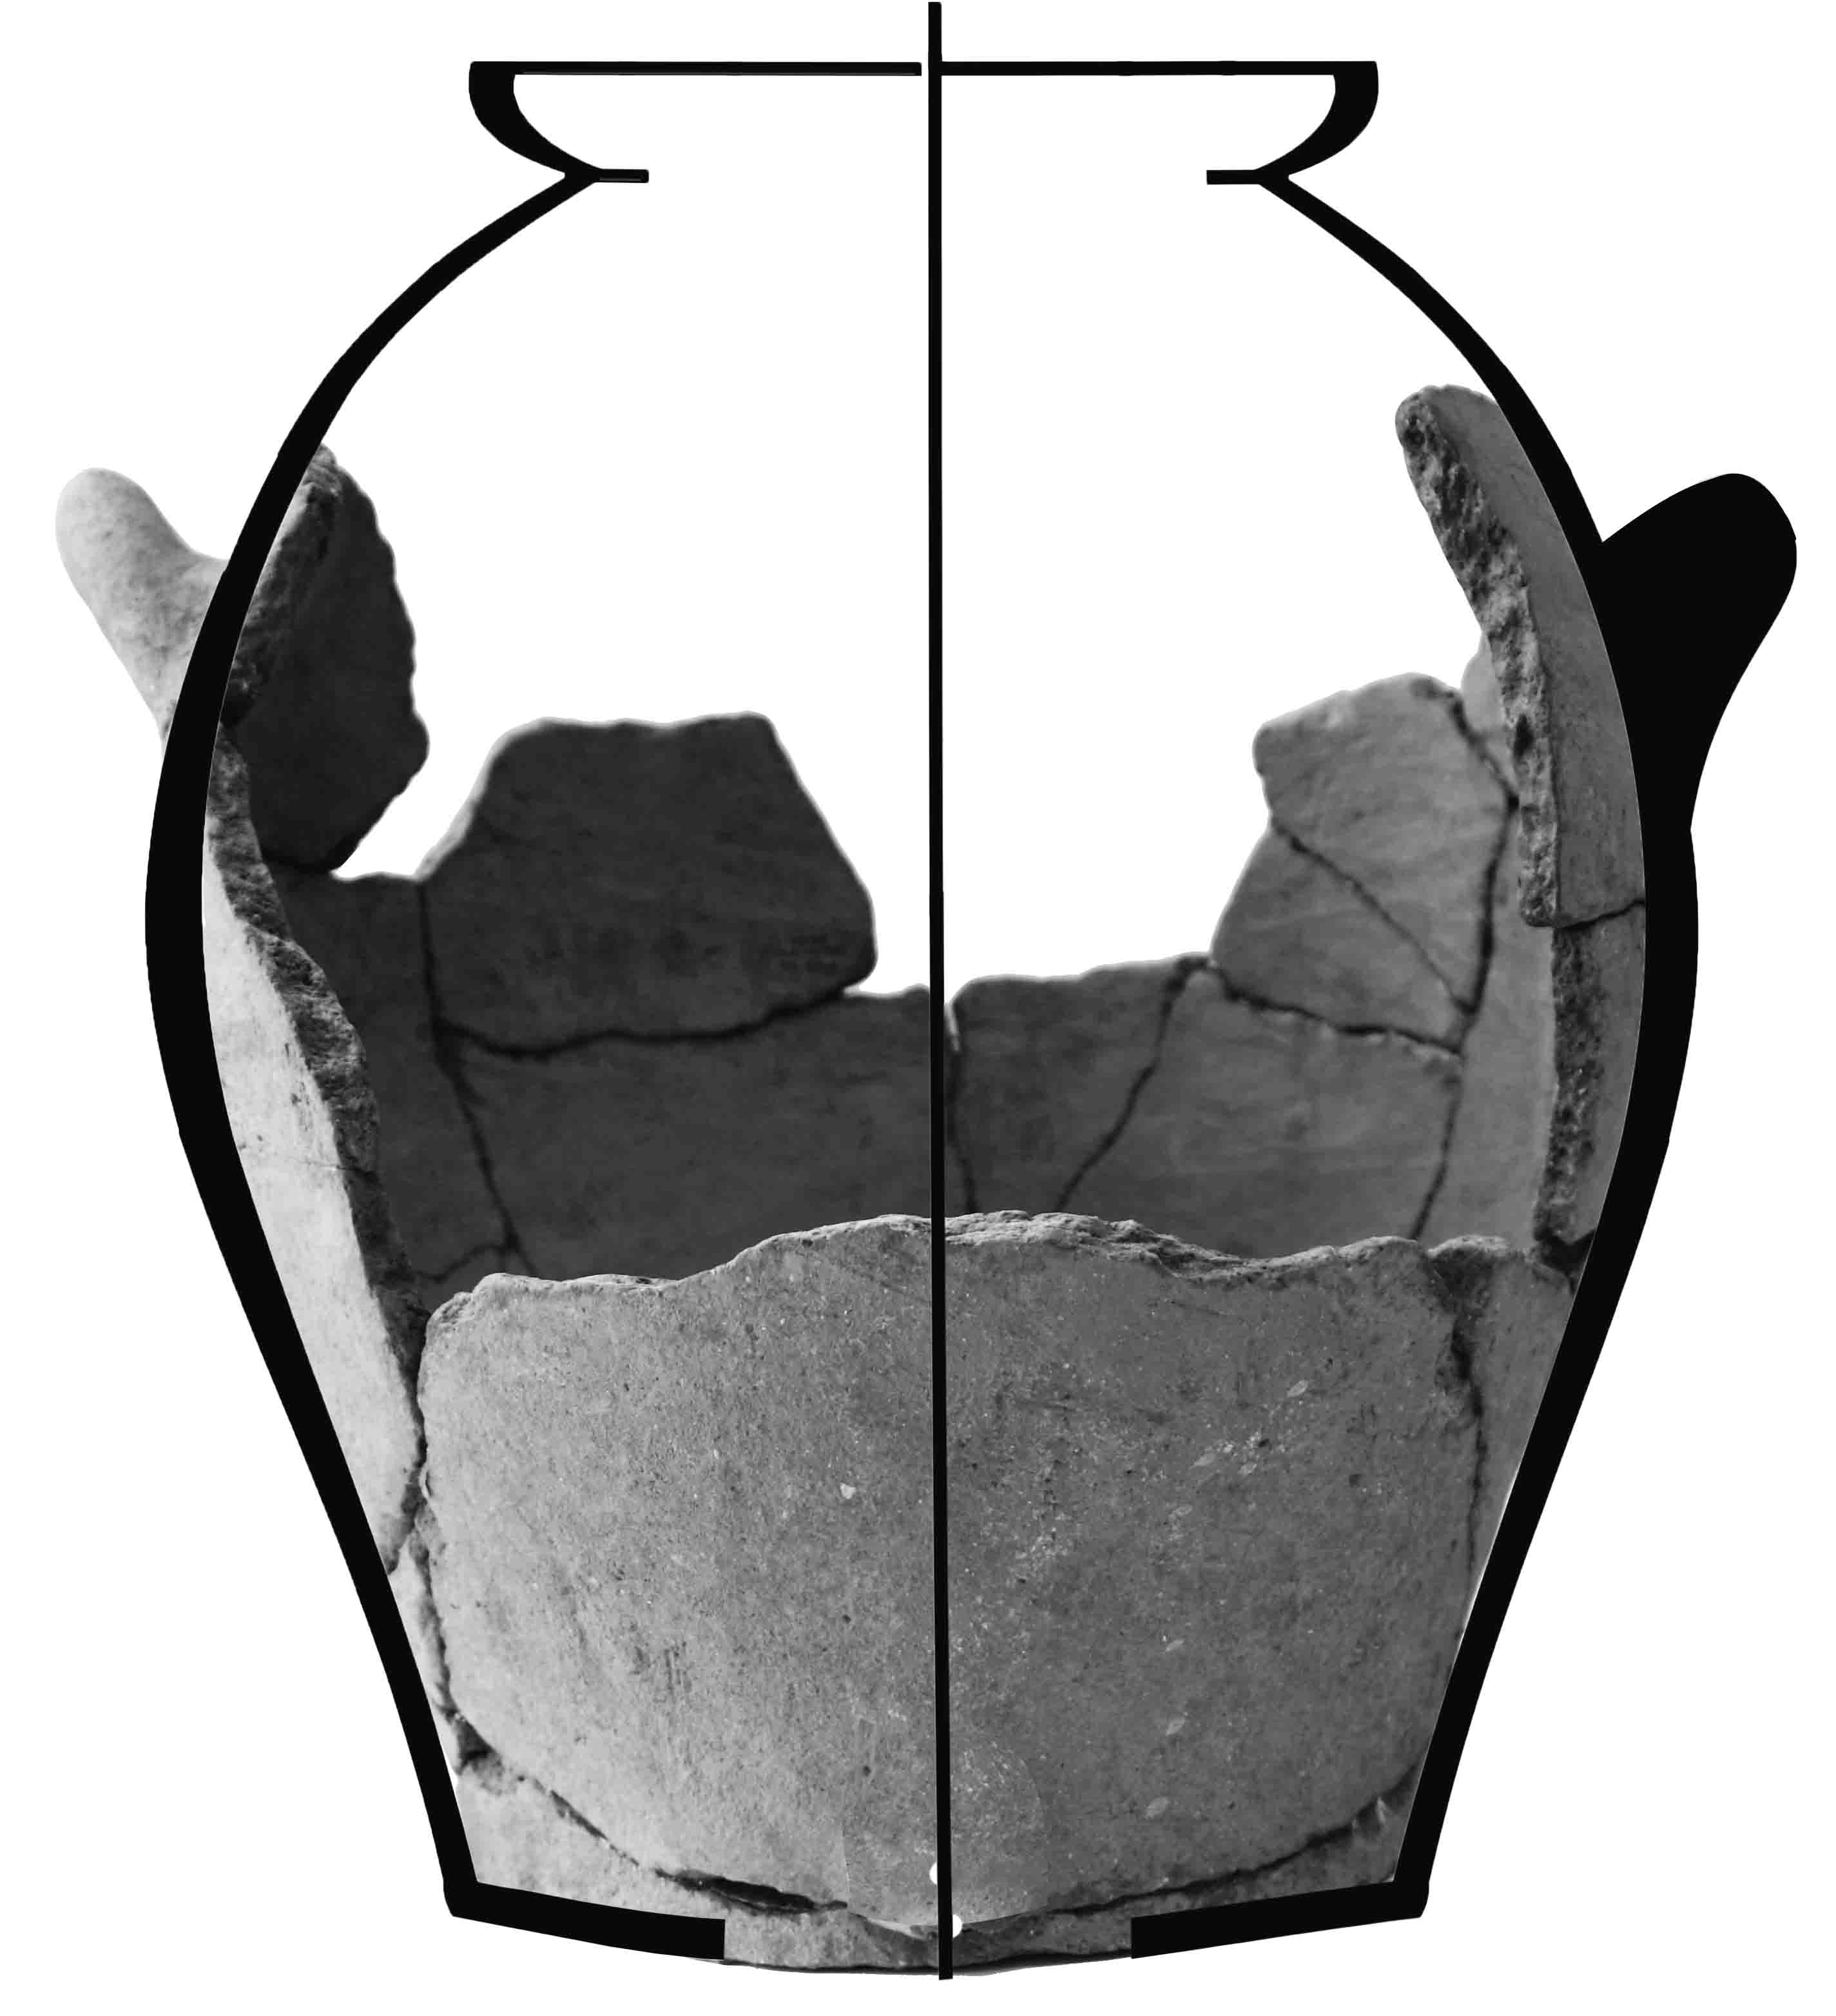** | |
| **A** | **Β** | **Γ** | **Δ** | **Ε** | **Ζ** | **Η** | **Θ** | **Ι** |
| **6** | **D** (±0.3) cm |  | **23.2** | **7.6** | **6.4** |  | **8.9** | **9.4** | **11.4** | **3.3** |
| **L** (±0.1) cm | **1.3** | **1.3** | **1.3** | **1.4** | **1.3** | **1.3** | **1.3** |
| **Bxz** (±1)nT | **88** | **105** | **102** | **93** | **86** | **93** | **104** |
| **By** (±1)nT | **-26** | **-8** | **8** | **23** | **26** | **23** | **19** |
| **B**(±1)nT | **92** | **105** | **102** | **96** | **90** | **96** | **106** |
| **θΒο** | **-74±1** | **-86±1** | **86±1** | **76±1** | **73±1** | **76±1** | **80±1** |
| **7** | **D** (±0.3) cm | **27.8** | **21.2** | **14.6** | **11.0** | **8.1** | **3.9** | **2.7** | **14.6** | **3.0** |
| **L** (±0.1) cm | **1.1** | **1.3** | **1.2** | **1.2** | **1.4** | **1.3** | **1.2** | **1.2** | **1.2** |
| **Bxz** (±1)nT | **47** | **88** | **100** | **107** | **94** | **95** | **89** | **95** | **107** |
| **By** (±1)nT | **-33** | **-26** | **-14** | **5** | **20** | **22** | **24** | **22** | **9** |
| **B**(±1)nT | **57** | **92** | **101** | **107** | **96** | **98** | **92** | **98** | **107** |
| **θΒο** | **-55±1** | **-74±1** | **-82±1** | **87±1** | **78±1** | **77±1** | **75±1** | **77±1** | **85±1** |
| **8** | **D** (±0.3) cm | **12.9** | **14.1** | **8.7** | **14.8** | **10.0** | **2.9** | **3.2** | **3.3** | **1.8** |
| **L** (±0.1) cm | **1.0** | **1.1** | **1.0** | **1.1** | **1.2** | **1.1** | **1.1** | **1.1** | **1.1** |
| **Bxz** (±1)nT | **55** | **87** | **102** | **104** | **92** | **86** | **77** | **85** | **97** |
| **By** (±1)nT | **-36** | **-27** | **-9** | **9** | **22** | **25** | **30** | **27** | **12** |
| **B**(±1)nT | **66** | **91** | **102** | **104** | **95** | **90** | **83** | **89** | **98** |
| **θΒο** | **-57±1** | **-73±1** | **-85±1** | **85±1** | **77±1** | **74±1** | **69±1** | **72±1** | **83±1** |
| **9** | **D** (±0.3) cm | **4.9** | **7.6** | **8.7** | **16.6** | **13.0** | **4.1** |  | **4.4** | **2.4** |
| **L** (±0.1) cm | **0.9** | **0.9** | **0.9** | **1.0** | **1.1** | **1.0** | **0.9** | **1.0** |
| **Bxz** (±1)nT | **51** | **81** | **108** | **101** | **88** | **77** | **77** | **102** |
| **By** (±1)nT | **-31** | **-24** | **-2** | **12** | **25** | **29** | **28** | **16** |
| **B**(±1)nT | **60** | **84** | **108** | **102** | **91** | **82** | **82** | **103** |
| **θΒο** | **-59±1** | **-73±1** | **-89±1** | **83±1** | **74±1** | **69±1** | **70±1** | **81±1** |

**Table 7b**. *Measurements D, L, and sensor readings of Bi (i=xz,y), with the x-sensor aligned along the common direction of Bxz, Μxz, on the body fragments of* ***vase 2****.*


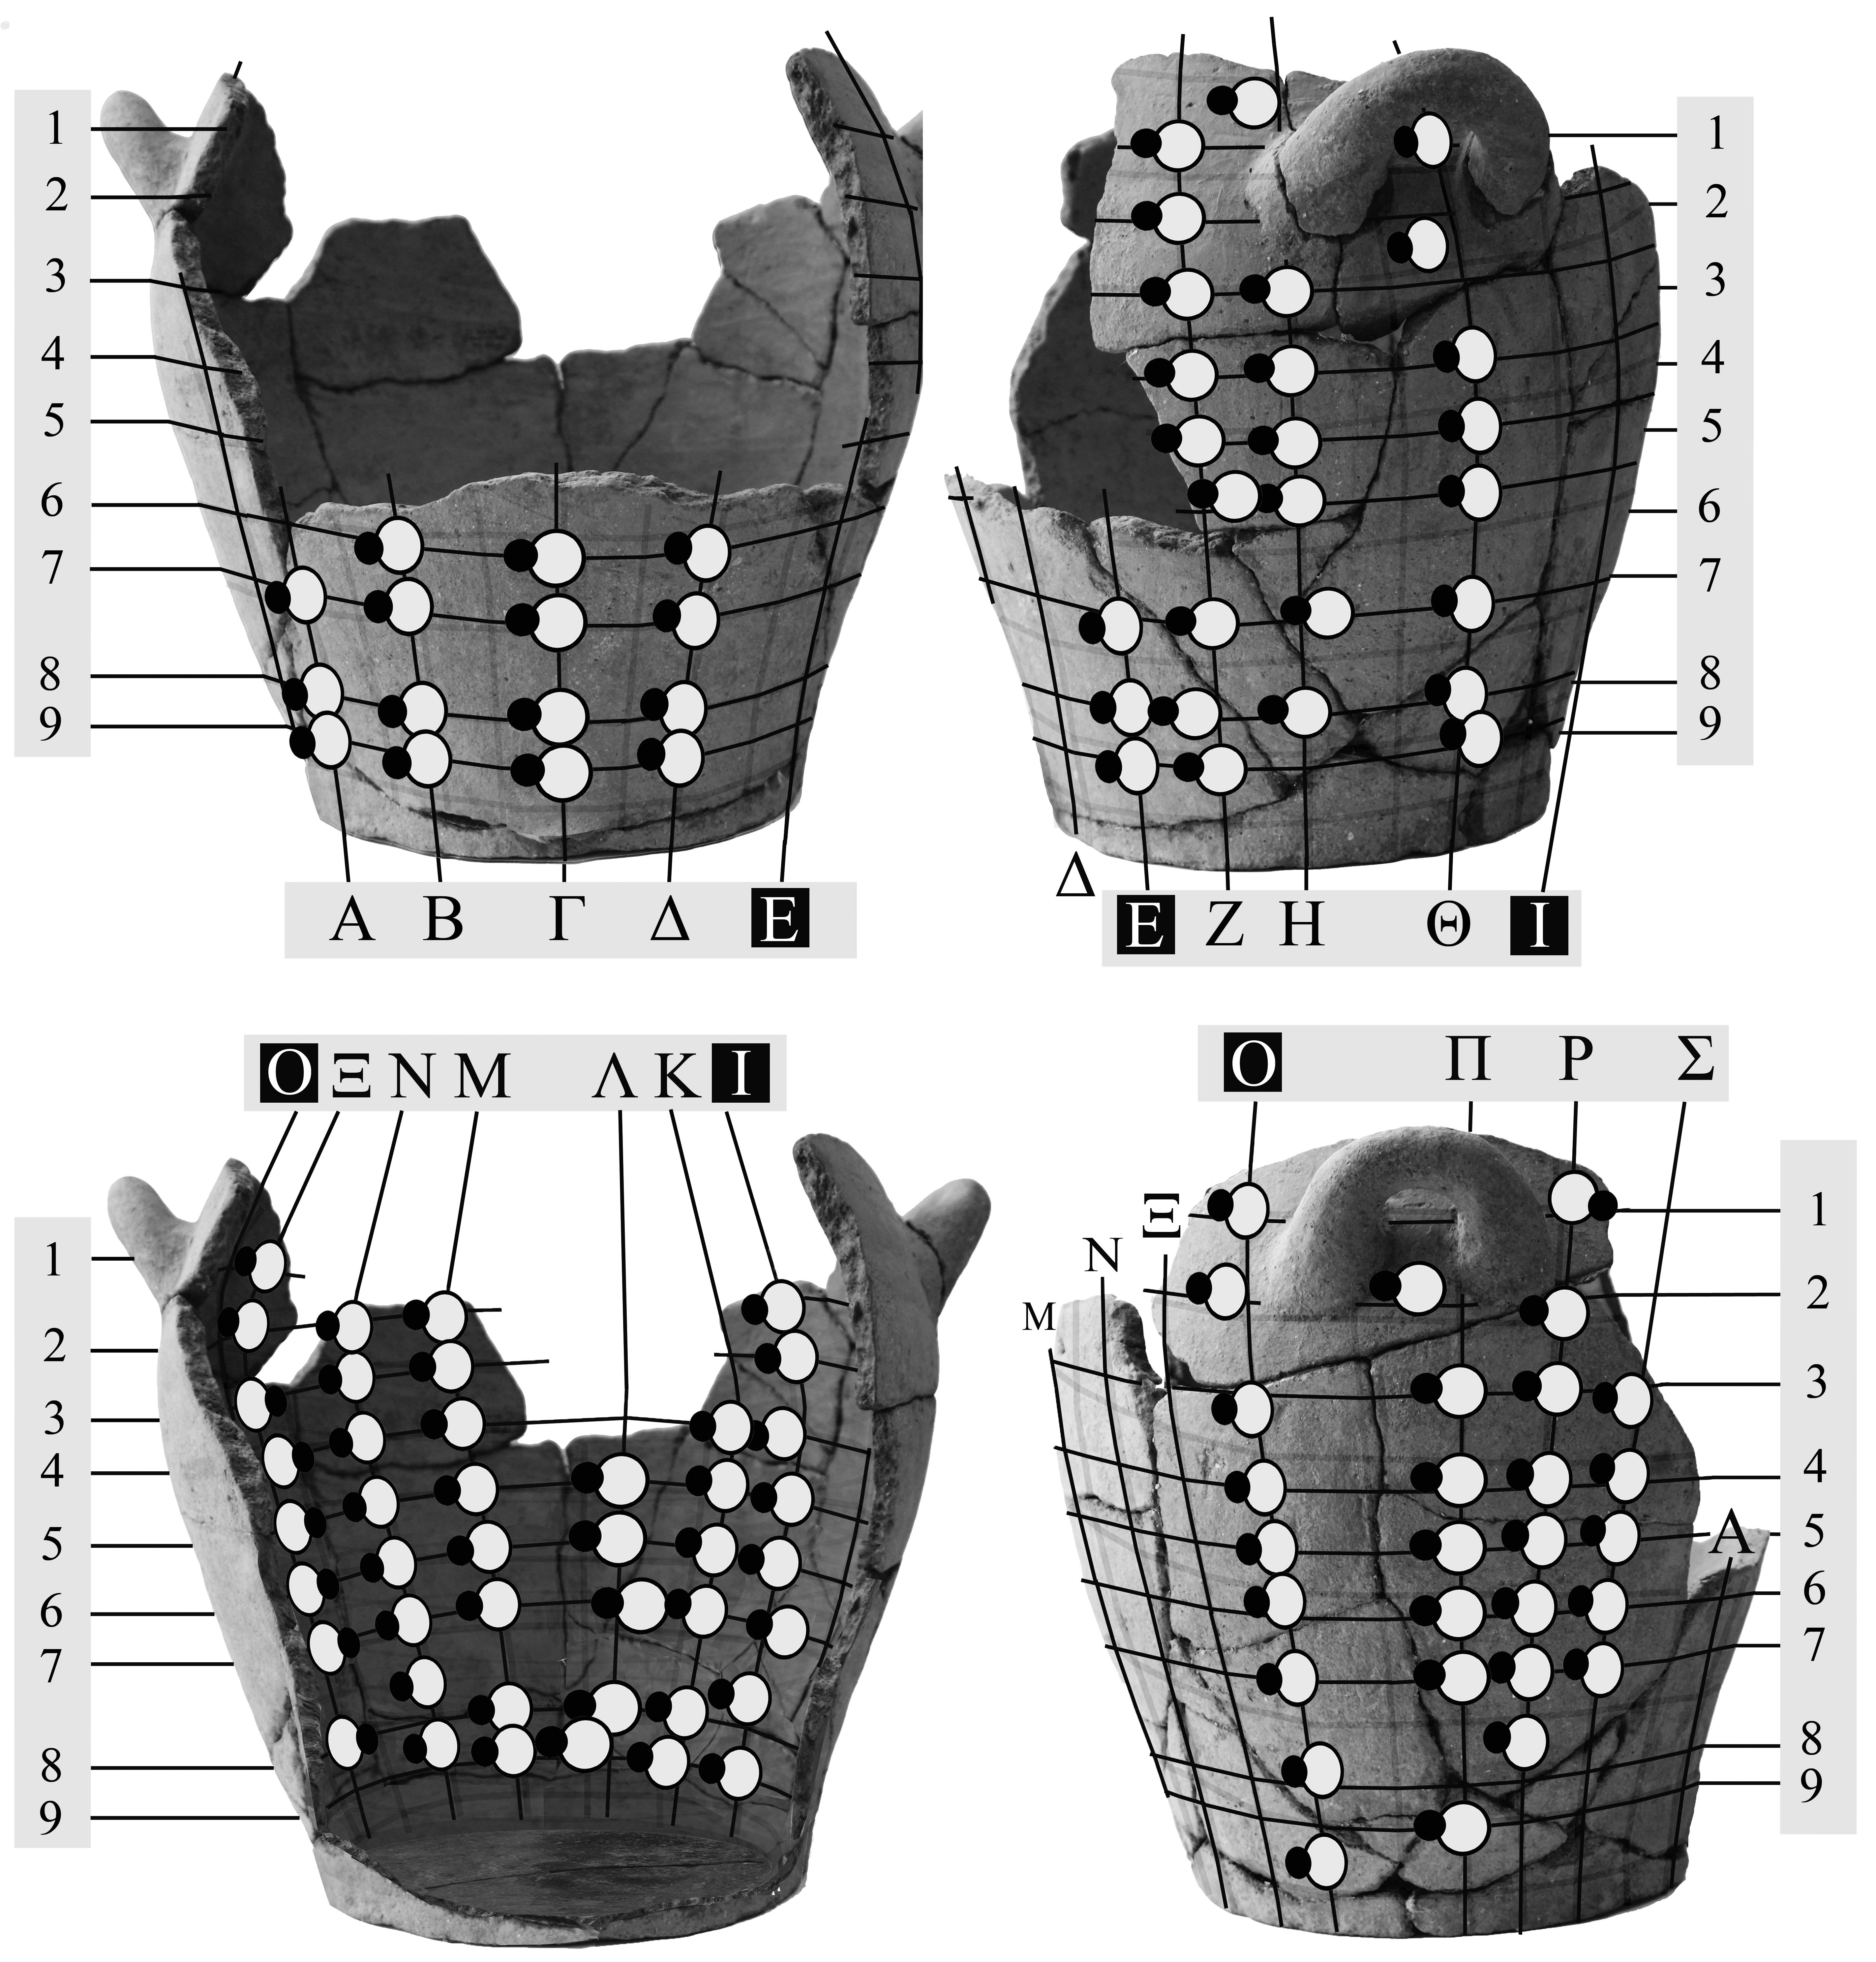


| **Vase 2** | |  | | | | | | | | |
| --- | --- | --- | --- | --- | --- | --- | --- | --- | --- | --- |
| 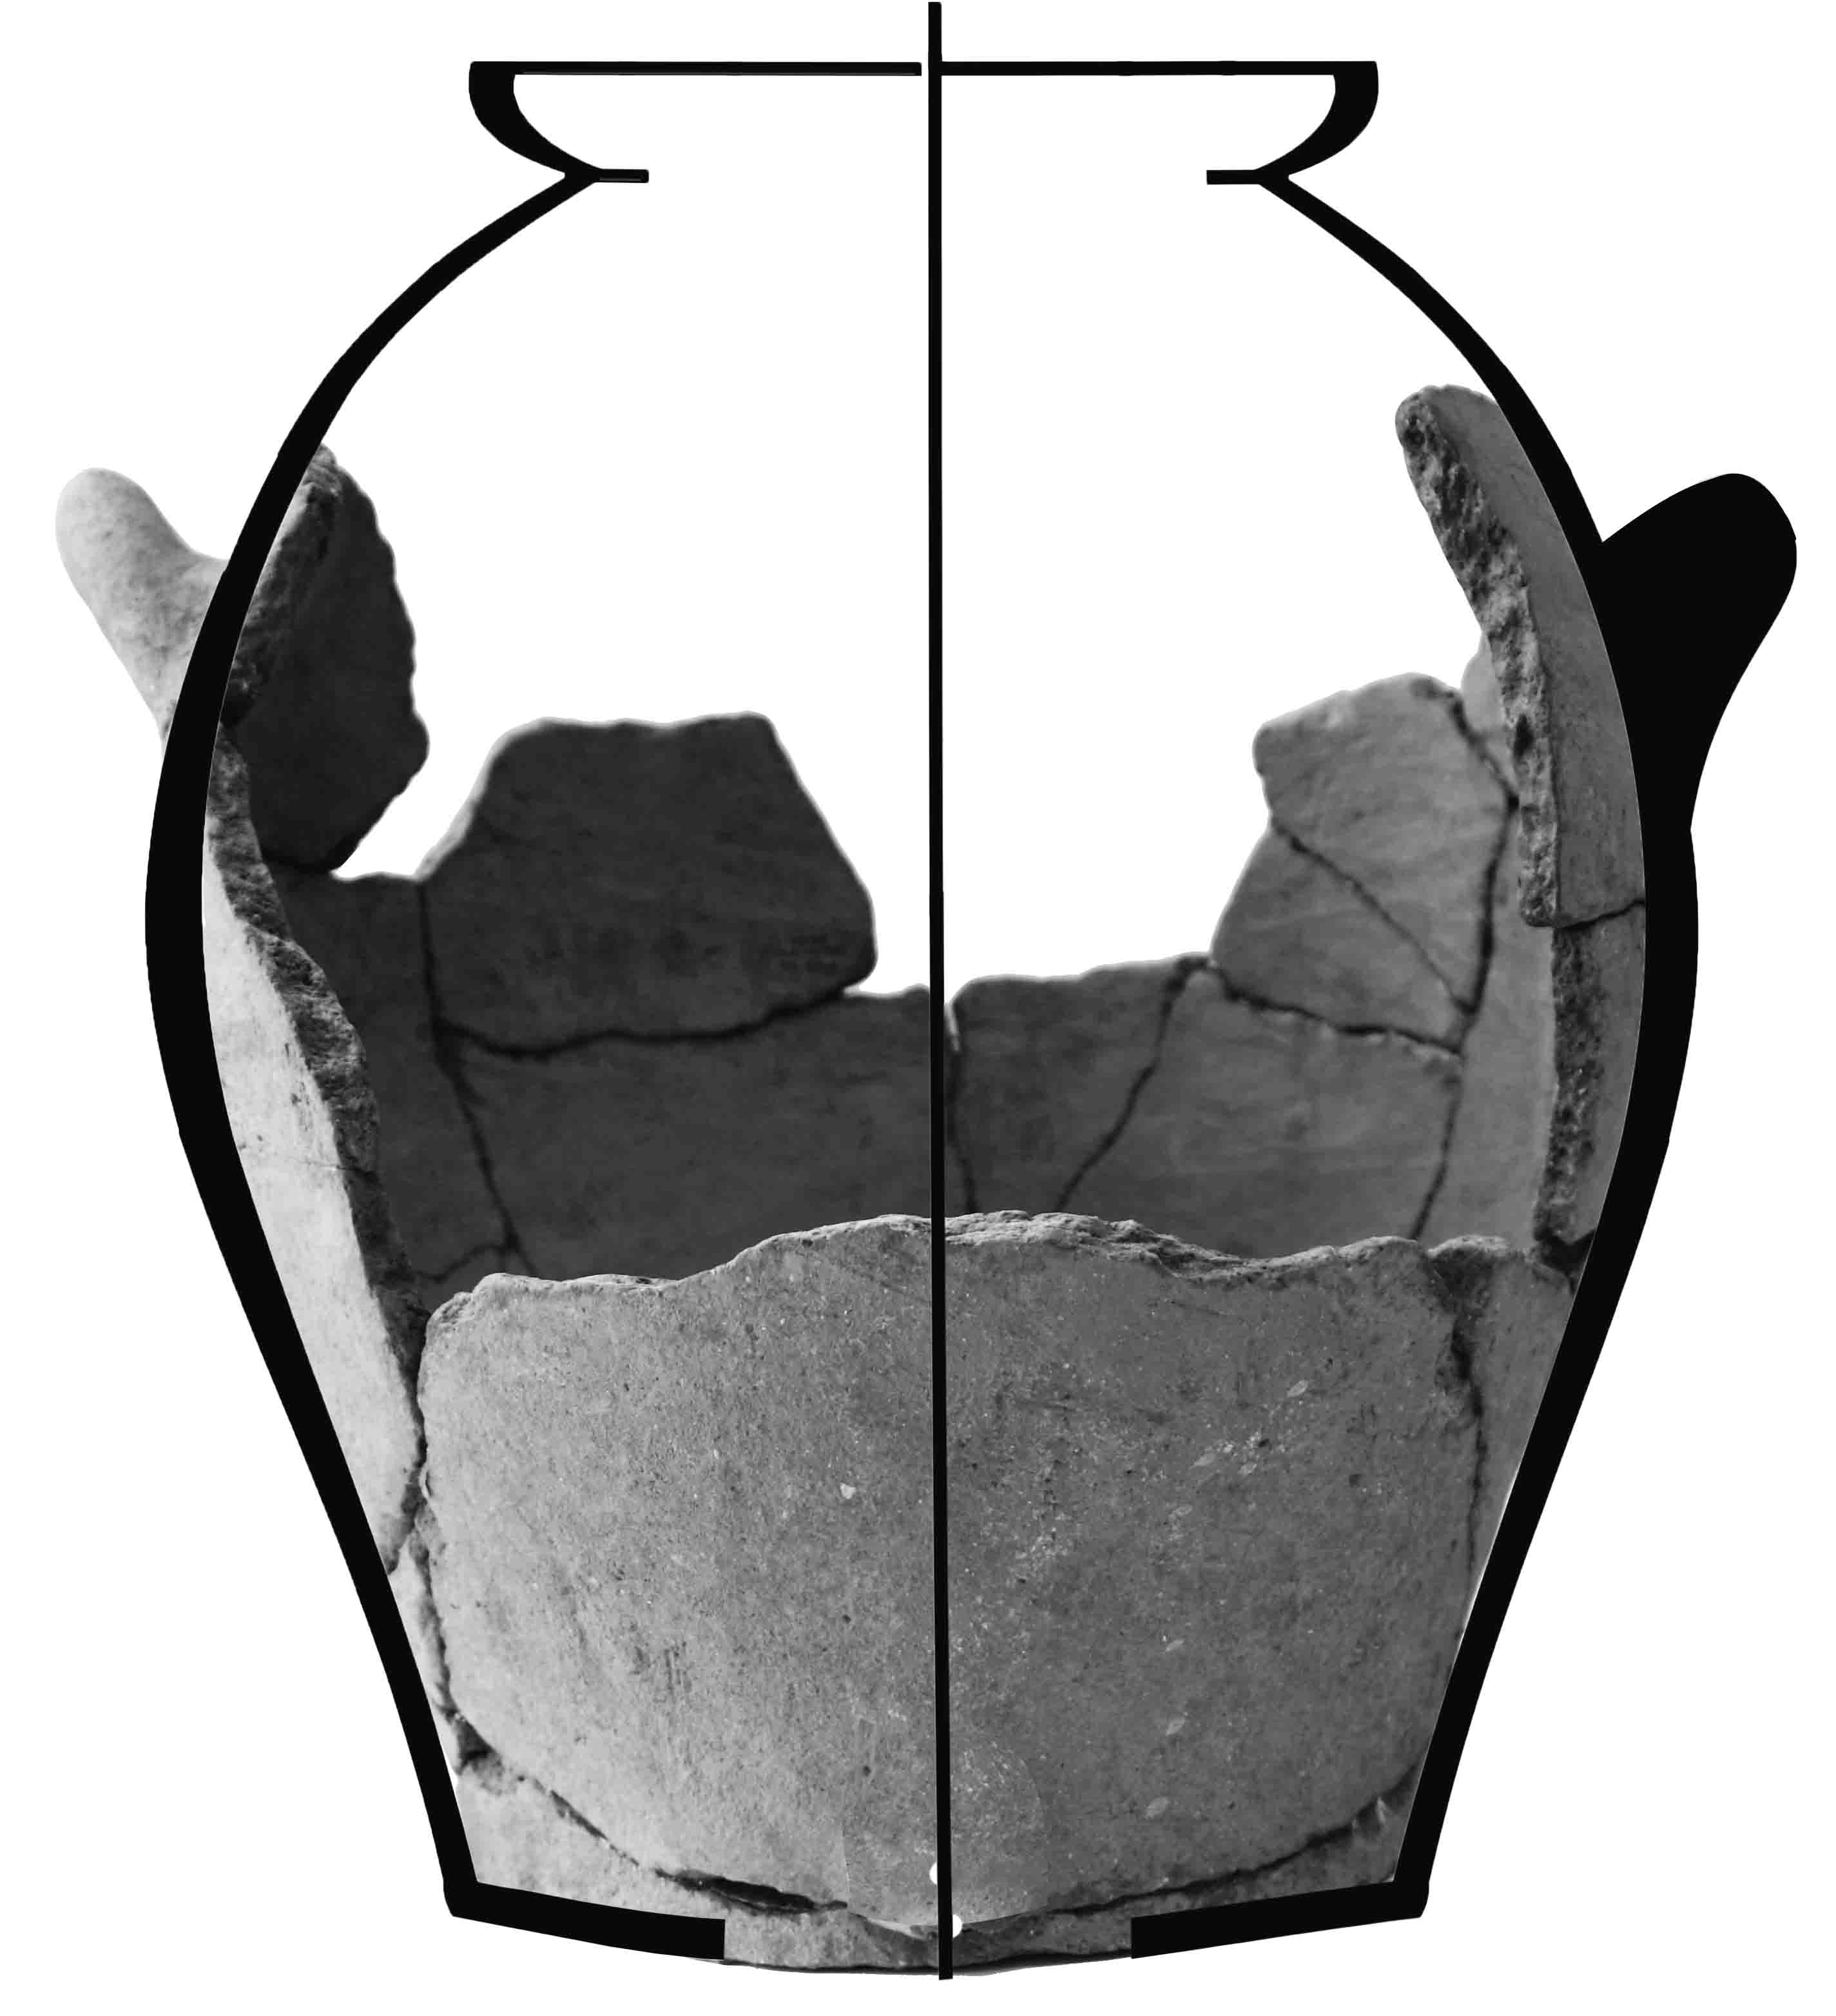 | |
| **Κ** | **Λ** | **Μ** | **Ν** | **Ξ** | **Ο** | **Π** | **Ρ** | **Σ** |
| **1** | **D** (±0.3) cm |  |  |  |  | **7.2** | **9.4** |  | **4.2** |  |
| **L** (±0.1) cm | **1.1** | **1.1** | **1.0** |
| **Bxz** (±1)nT | **101** | **101** | **86** |
| **By** (±1)nT | **-15** | **-16** | **-22** |
| **B**(±1)nT | **102** | **102** | **89** |
| **θΒο** | **-82±1** | **-81±1** | **-76±1** |
| **2** | **D** (±0.3) cm |  |  | **10.9** | **2.7** | **3.6** | **5.0** | **3.0** | **12.6** |  |
| **L** (±0.1) cm | **1.1** | **1.2** | **1.2** | **1.2** | **1.1** | **1.0** |
| **Bxz** (±1)nT | **105** | **106** | **95** | **81** | **71** | **73** |
| **By** (±1)nT | **-2** | **-10** | **-21** | **-30** | **-29** | **-32** |
| **B**(±1)nT | **105** | **106** | **97** | **86** | **77** | **80** |
| **θΒο** | **-89±1** | **-85±1** | **-78±1** | **-70±1** | **-68±1** | **-66±1** |
| **3** | **D** (±0.3) cm |  |  | **11.6** | **4.7** | **8.6** | **10.7** | **8.4** | **8.4** | **8.5** |
| **L** (±0.1) cm | **1.2** | **1.3** | **1.3** | **1.3** | **1.2** | **1.1** | **1.1** |
| **Bxz** (±1)nT | **103** | **104** | **92** | **87** | **67** | **67** | **73** |
| **By** (±1)nT | **-5** | **-12** | **-23** | **-26** | **-33** | **-30** | **-30** |
| **B**(±1)nT | **103** | **105** | **95** | **91** | **75** | **73** | **79** |
| **θΒο** | **-87±1** | **-83±1** | **-76±1** | **-73±1** | **-64±1** | **-66±1** | **-68±1** |
| **4** | **D** (±0.3) cm | **3.6** |  | **6.7** | **3.3** | **8.6** | **8.4** | **2.0** | **2.6** | **3.2** |
| **L** (±0.1) cm | **1.4** | **1.6** | **1.7** | **1.7** | **1.7** | **1.6** | **1.5** | **1.5** |
| **Bxz** (±1)nT | **103** | **107** | **97** | **81** | **65** | **45** | **50** | **57** |
| **By** (±1)nT | **17** | **-11** | **-19** | **-30** | **-33** | **-42** | **-38** | **-40** |
| **B**(±1)nT | **104** | **108** | **99** | **86** | **73** | **62** | **63** | **70** |
| **θΒο** | **81±1** | **-84±1** | **-79±1** | **-70±1** | **-63±1** | **-47±1** | **-53±1** | **-55±1** |
| **5** | **D** (±0.3) cm | **3.0** | **4.0** | **9.9** | **3.9** | **5.4** | **7.9** | **14.8** | **11.7** | **7.6** |
| **L** (±0.1) cm | **1.2** | **1.3** | **1.4** | **1.5** | **1.4** | **1.5** | **1.4** | **1.4** | **1.3** |
| **Bxz** (±1)nT | **107** | **109** | **99** | **90** | **79** | **52** | **35** | **31** | **48** |
| **By** (±1)nT | **6** | **-3** | **-16** | **-27** | **-32** | **-40** | **-41** | **-41** | **-38** |
| **B**(±1)nT | **107** | **109** | **100** | **94** | **85** | **66** | **54** | **51** | **61** |
| **θΒο** | **87±1** | **-88±1** | **-81±1** | **-73±1** | **-68±1** | **-52±1** | **-40±1** | **-37±1** | **-52±1** |

**Table 7c**. *Measurements D, L, and sensor readings of Bi (i=xz,y), with the x-sensor aligned along the common direction of Bxz, Μxz, on the body fragments of* ***vase 2****.*


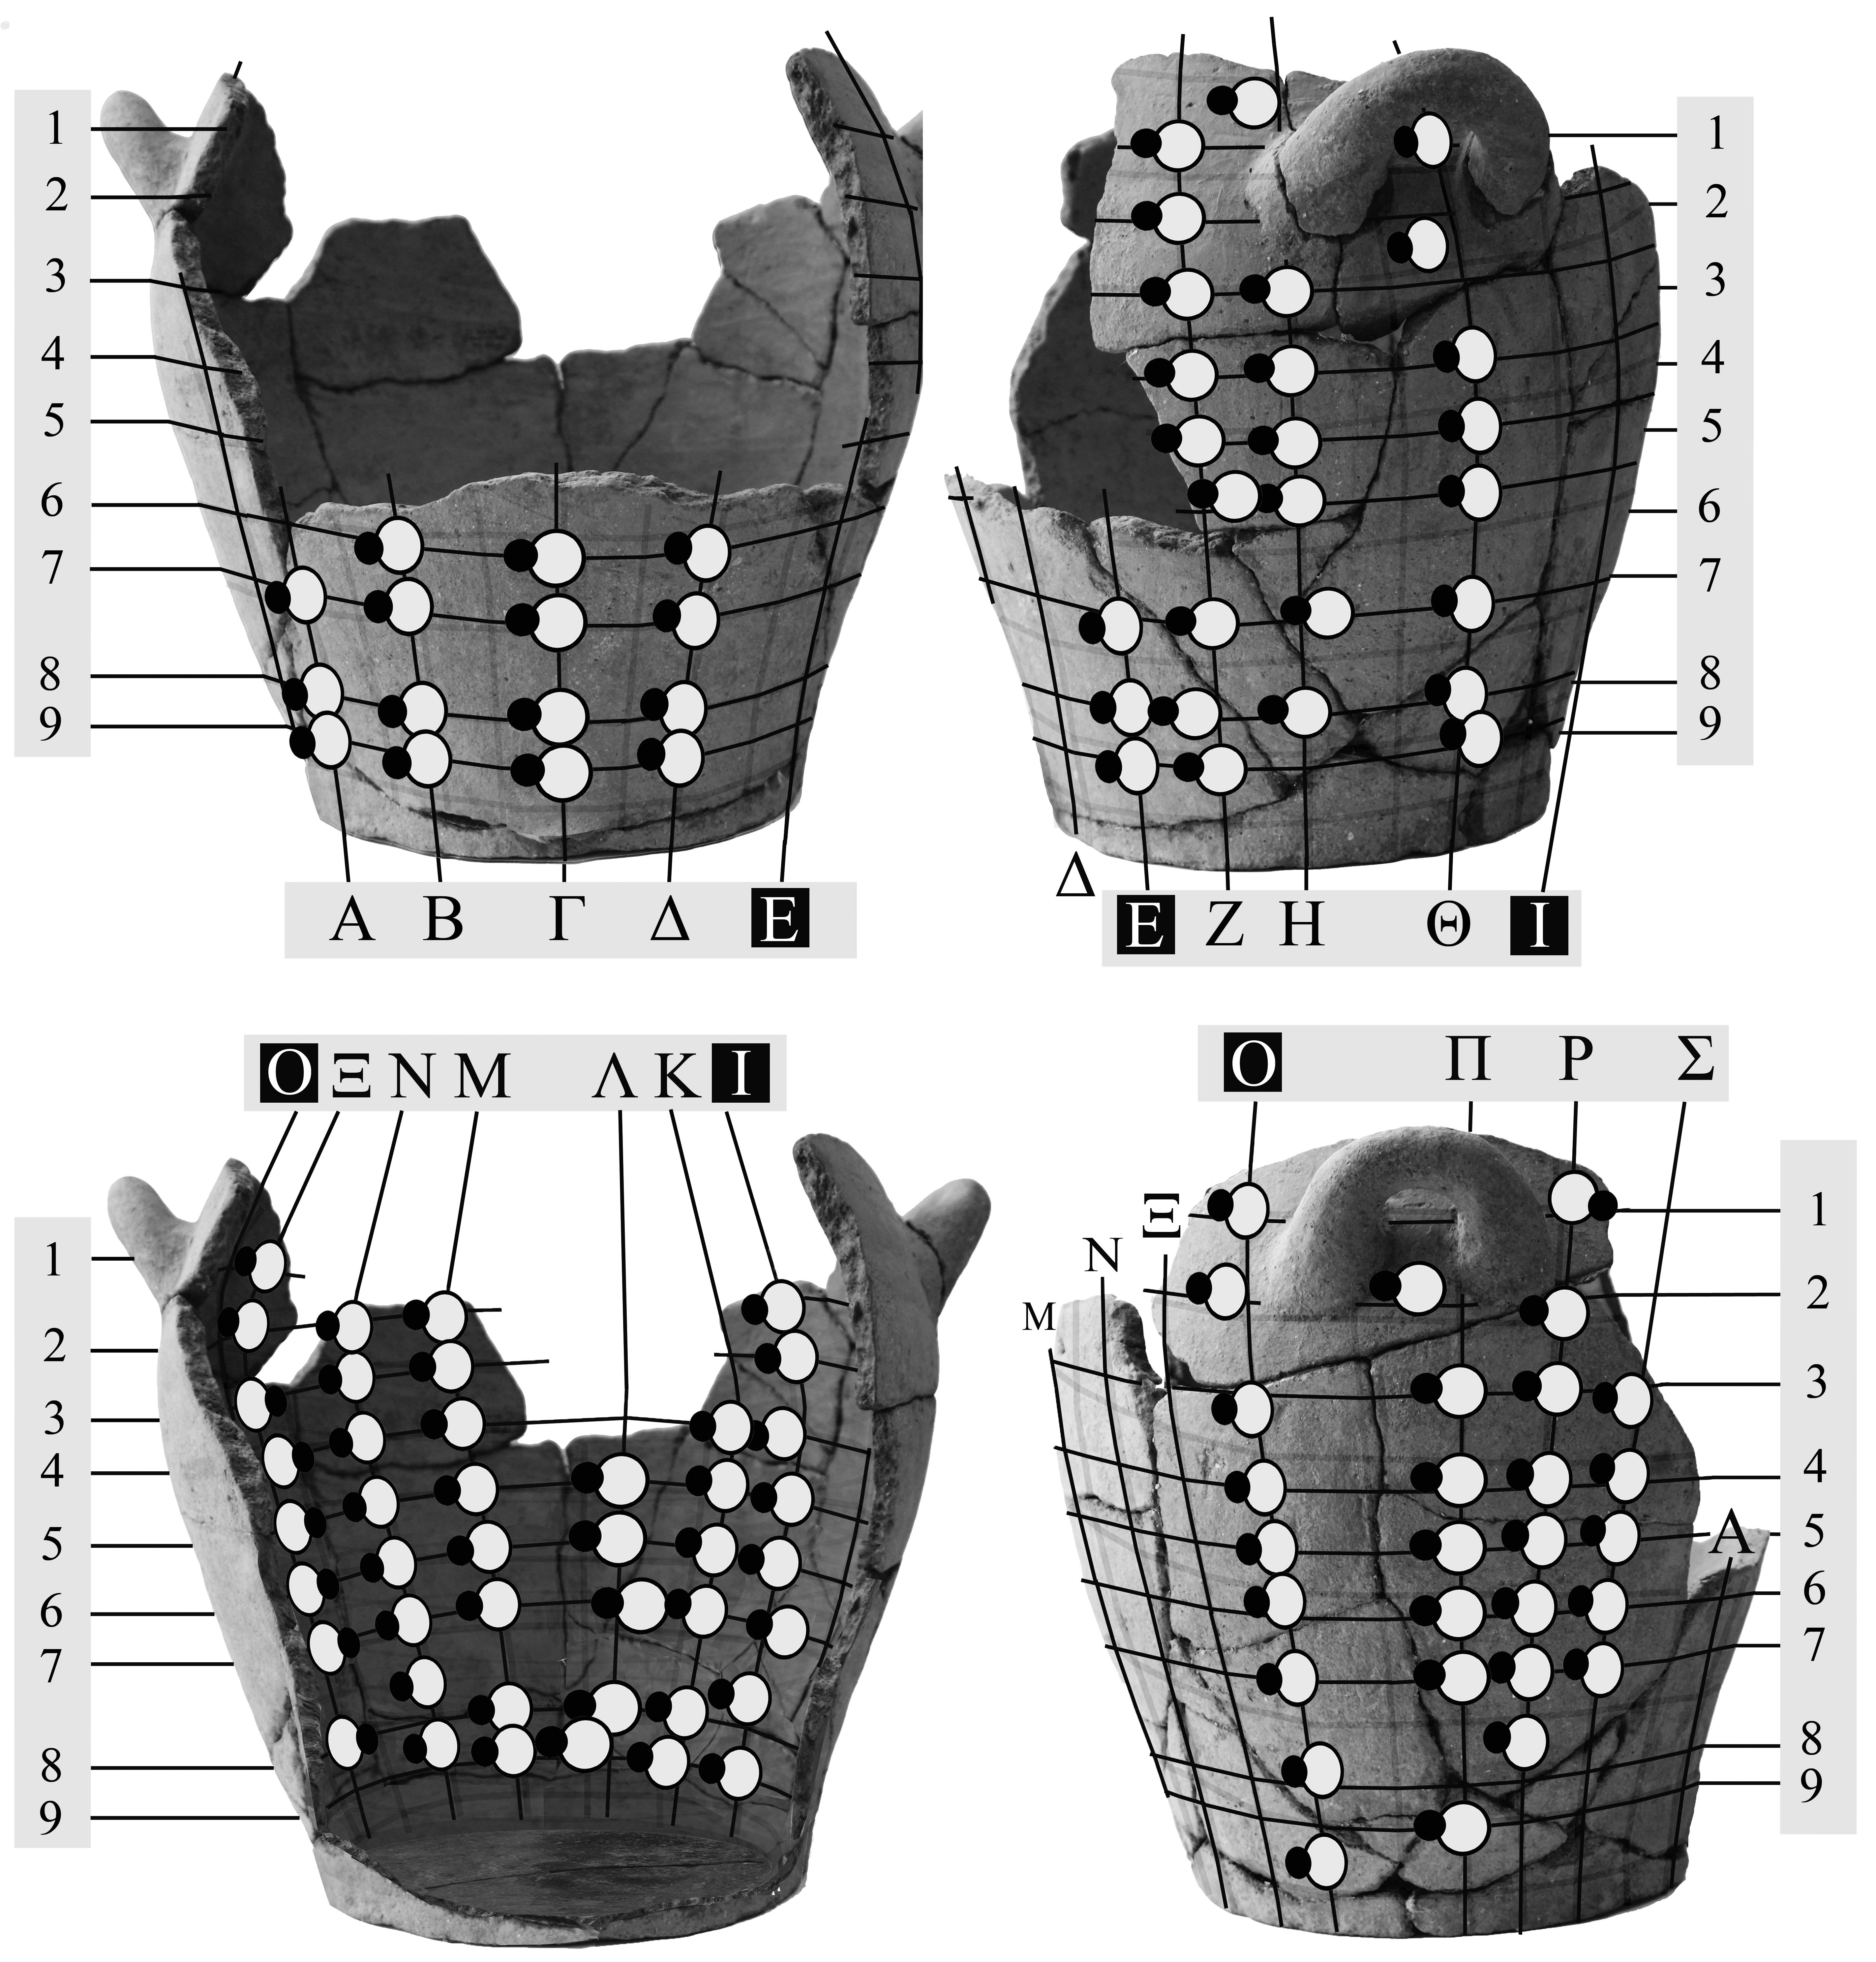


| **Vase 2** | |  | | | | | | | | |
| --- | --- | --- | --- | --- | --- | --- | --- | --- | --- | --- |
| 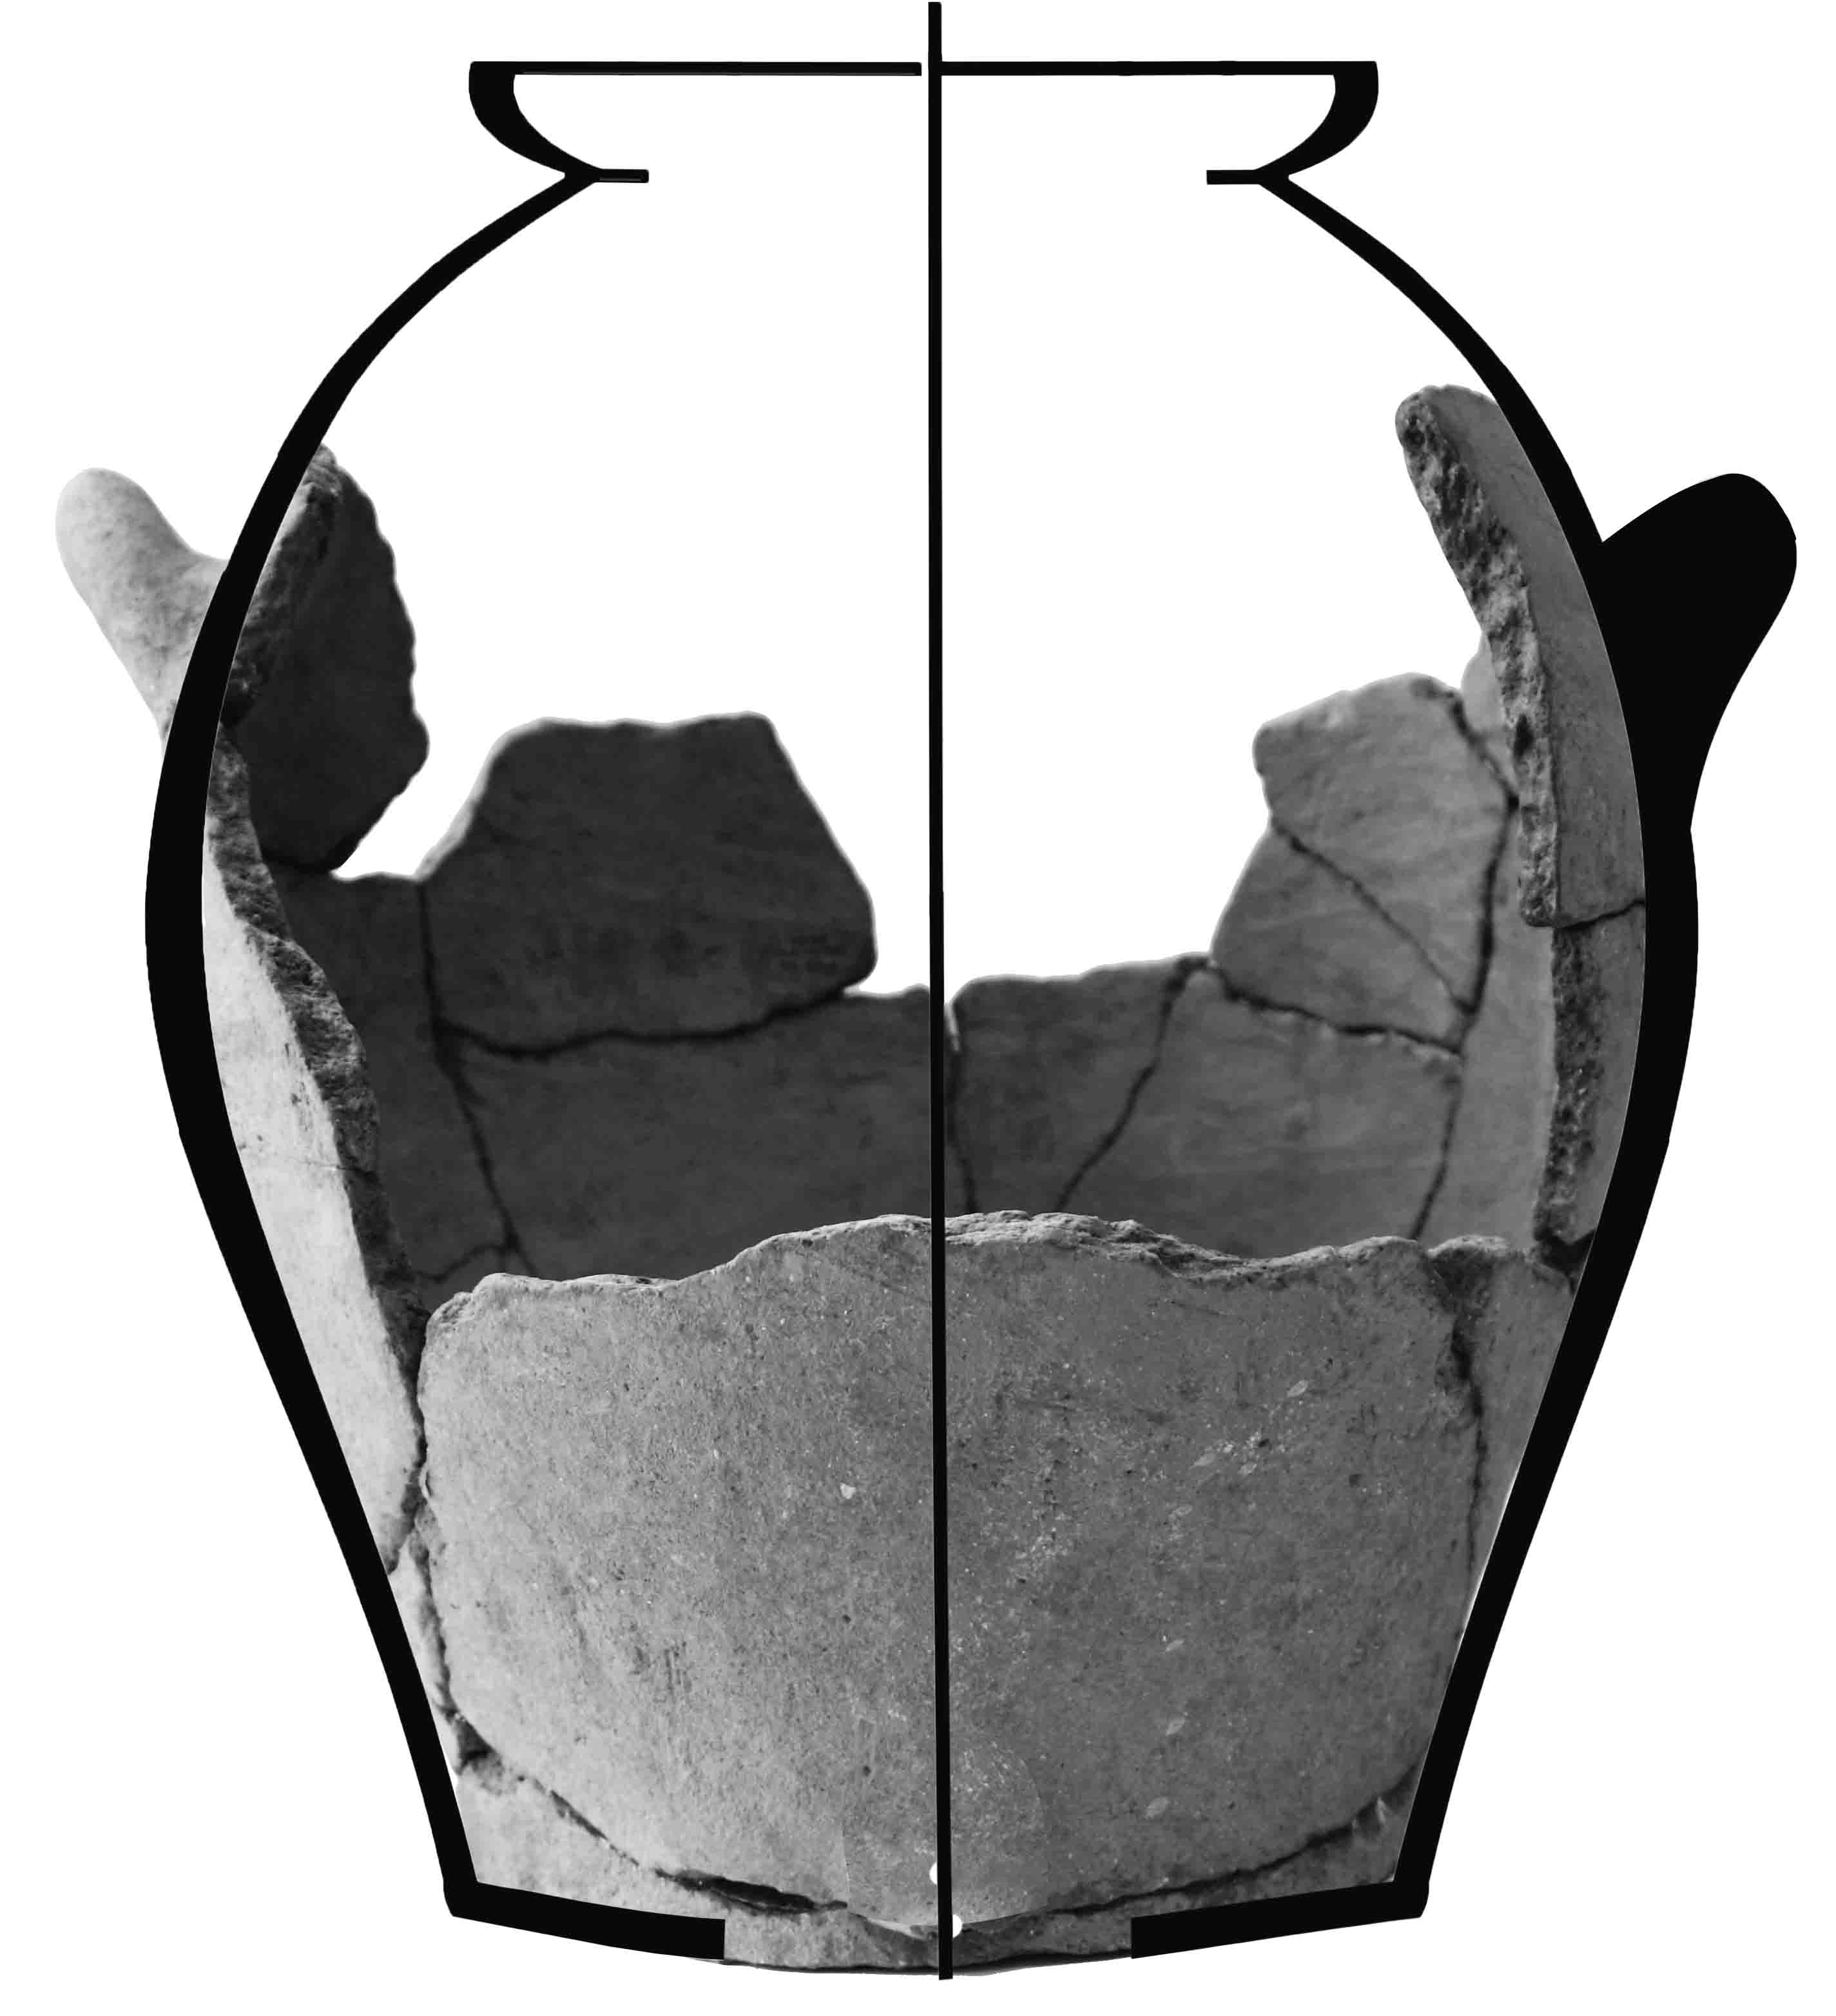 | |
| **Κ** | **Λ** | **Μ** | **Ν** | **Ξ** | **Ο** | **Π** | **Ρ** | **Σ** |
| **6** | **D** (±0.3) cm | **7.5** | **3.9** | **8.8** | **3.7** | **6.7** | **5.7** | **9.8** | **7.8** | **4.8** |
| **L** (±0.1) cm | **1.2** | **1.2** | **1.3** | **1.4** | **1.5** | **1.4** | **1.3** | **1.3** | **1.3** |
| **Bxz** (±1)nT | **104** | **103** | **99** | **86** | **68** | **49** | **27** | **26** | **36** |
| **By (±1)nT** | **6** | **-7** | **-16** | **-25** | **-36** | **-37** | **-40** | **-40** | **-41** |
| **B(±1)nT** | **104** | **103** | **100** | **90** | **77** | **61** | **48** | **48** | **55** |
| **θΒο** | **87±1** | **-86±1** | **-81±1** | **-74±1** | **-62±1** | **-53±1** | **-34±1** | **-33±1** | **-41±1** |
| **7** | **D (±0.3) cm** | **7.7** | **10.5** | **8.3** | **3.8** | **8.3** | **4.2** | **5.4** | **5.0** | **2.0** |
| **L (±0.1) cm** | **1.2** | **1.2** | **1.2** | **1.2** | **1.3** | **1.3** | **1.3** | **1.2** | **1.2** |
| **Bxz (±1)nT** | **108** | **108** | **96** | **83** | **57** | **41** | **17** | **31** | **31** |
| **By (±1)nT** | **4** | **1** | **-20** | **-28** | **-37** | **-38** | **-43** | **-39** | **-39** |
| **B(±1)nT** | **108** | **108** | **98** | **88** | **68** | **56** | **46** | **50** | **50** |
| **θΒο** | **88±1** | **89±1** | **-78±1** | **-71±1** | **-57±1** | **-47±1** | **-22±1** | **-38±1** | **-38±1** |
| **8** | **D (±0.3) cm** | **2.3** | **1.8** | **6.6** | **2.7** | **3.8** | **2.0** |  | **2.0** |  |
| **L (±0.1) cm** | **1.1** | **1.1** | **1.1** | **1.1** | **1.2** | **1.2** | **1.1** |
| **Bxz (±1)nT** | **108** | **104** | **104** | **88** | **63** | **46** | **26** |
| **By (±1)nT** | **4** | **-5** | **-13** | **-24** | **-34** | **-37** | **-37** |
| **B(±1)nT** | **108** | **104** | **105** | **91** | **72** | **59** | **45** |
| **θΒο** | **88±1** | **-87±1** | **-83±1** | **-75±1** | **-62±1** | **-51±** | **-35±1** |
| **9** | **D (±0.3) cm** | **2.1** | **1.8** | **2.7** | **2.5** |  | **2.1** | **2.7** |  |  |
| **L (±0.1) cm** | **0.9** | **1.1** | **0.9** | **1.0** | **1.1** | **1.0** |
| **Bxz (±1)nT** | **103** | **108** | **105** | **91** | **48** | **32** |
| **By (±1)nT** | **8** | **-6** | **-12** | **-23** | **-35** | **-36** |
| **B(±1)nT** | **103** | **108** | **106** | **94** | **59** | **48** |
| **θΒο** | **86±1** | **-87±1** | **-83±1** | **-76±1** | **-54±1** | **-42±1** |

**Table 7d**. *Measurements D, L, and sensor readings of Bi (i=xz,y), with the x-sensor aligned along the common direction of Bxz, Μxz, on the body fragments of* ***vase 2****.*


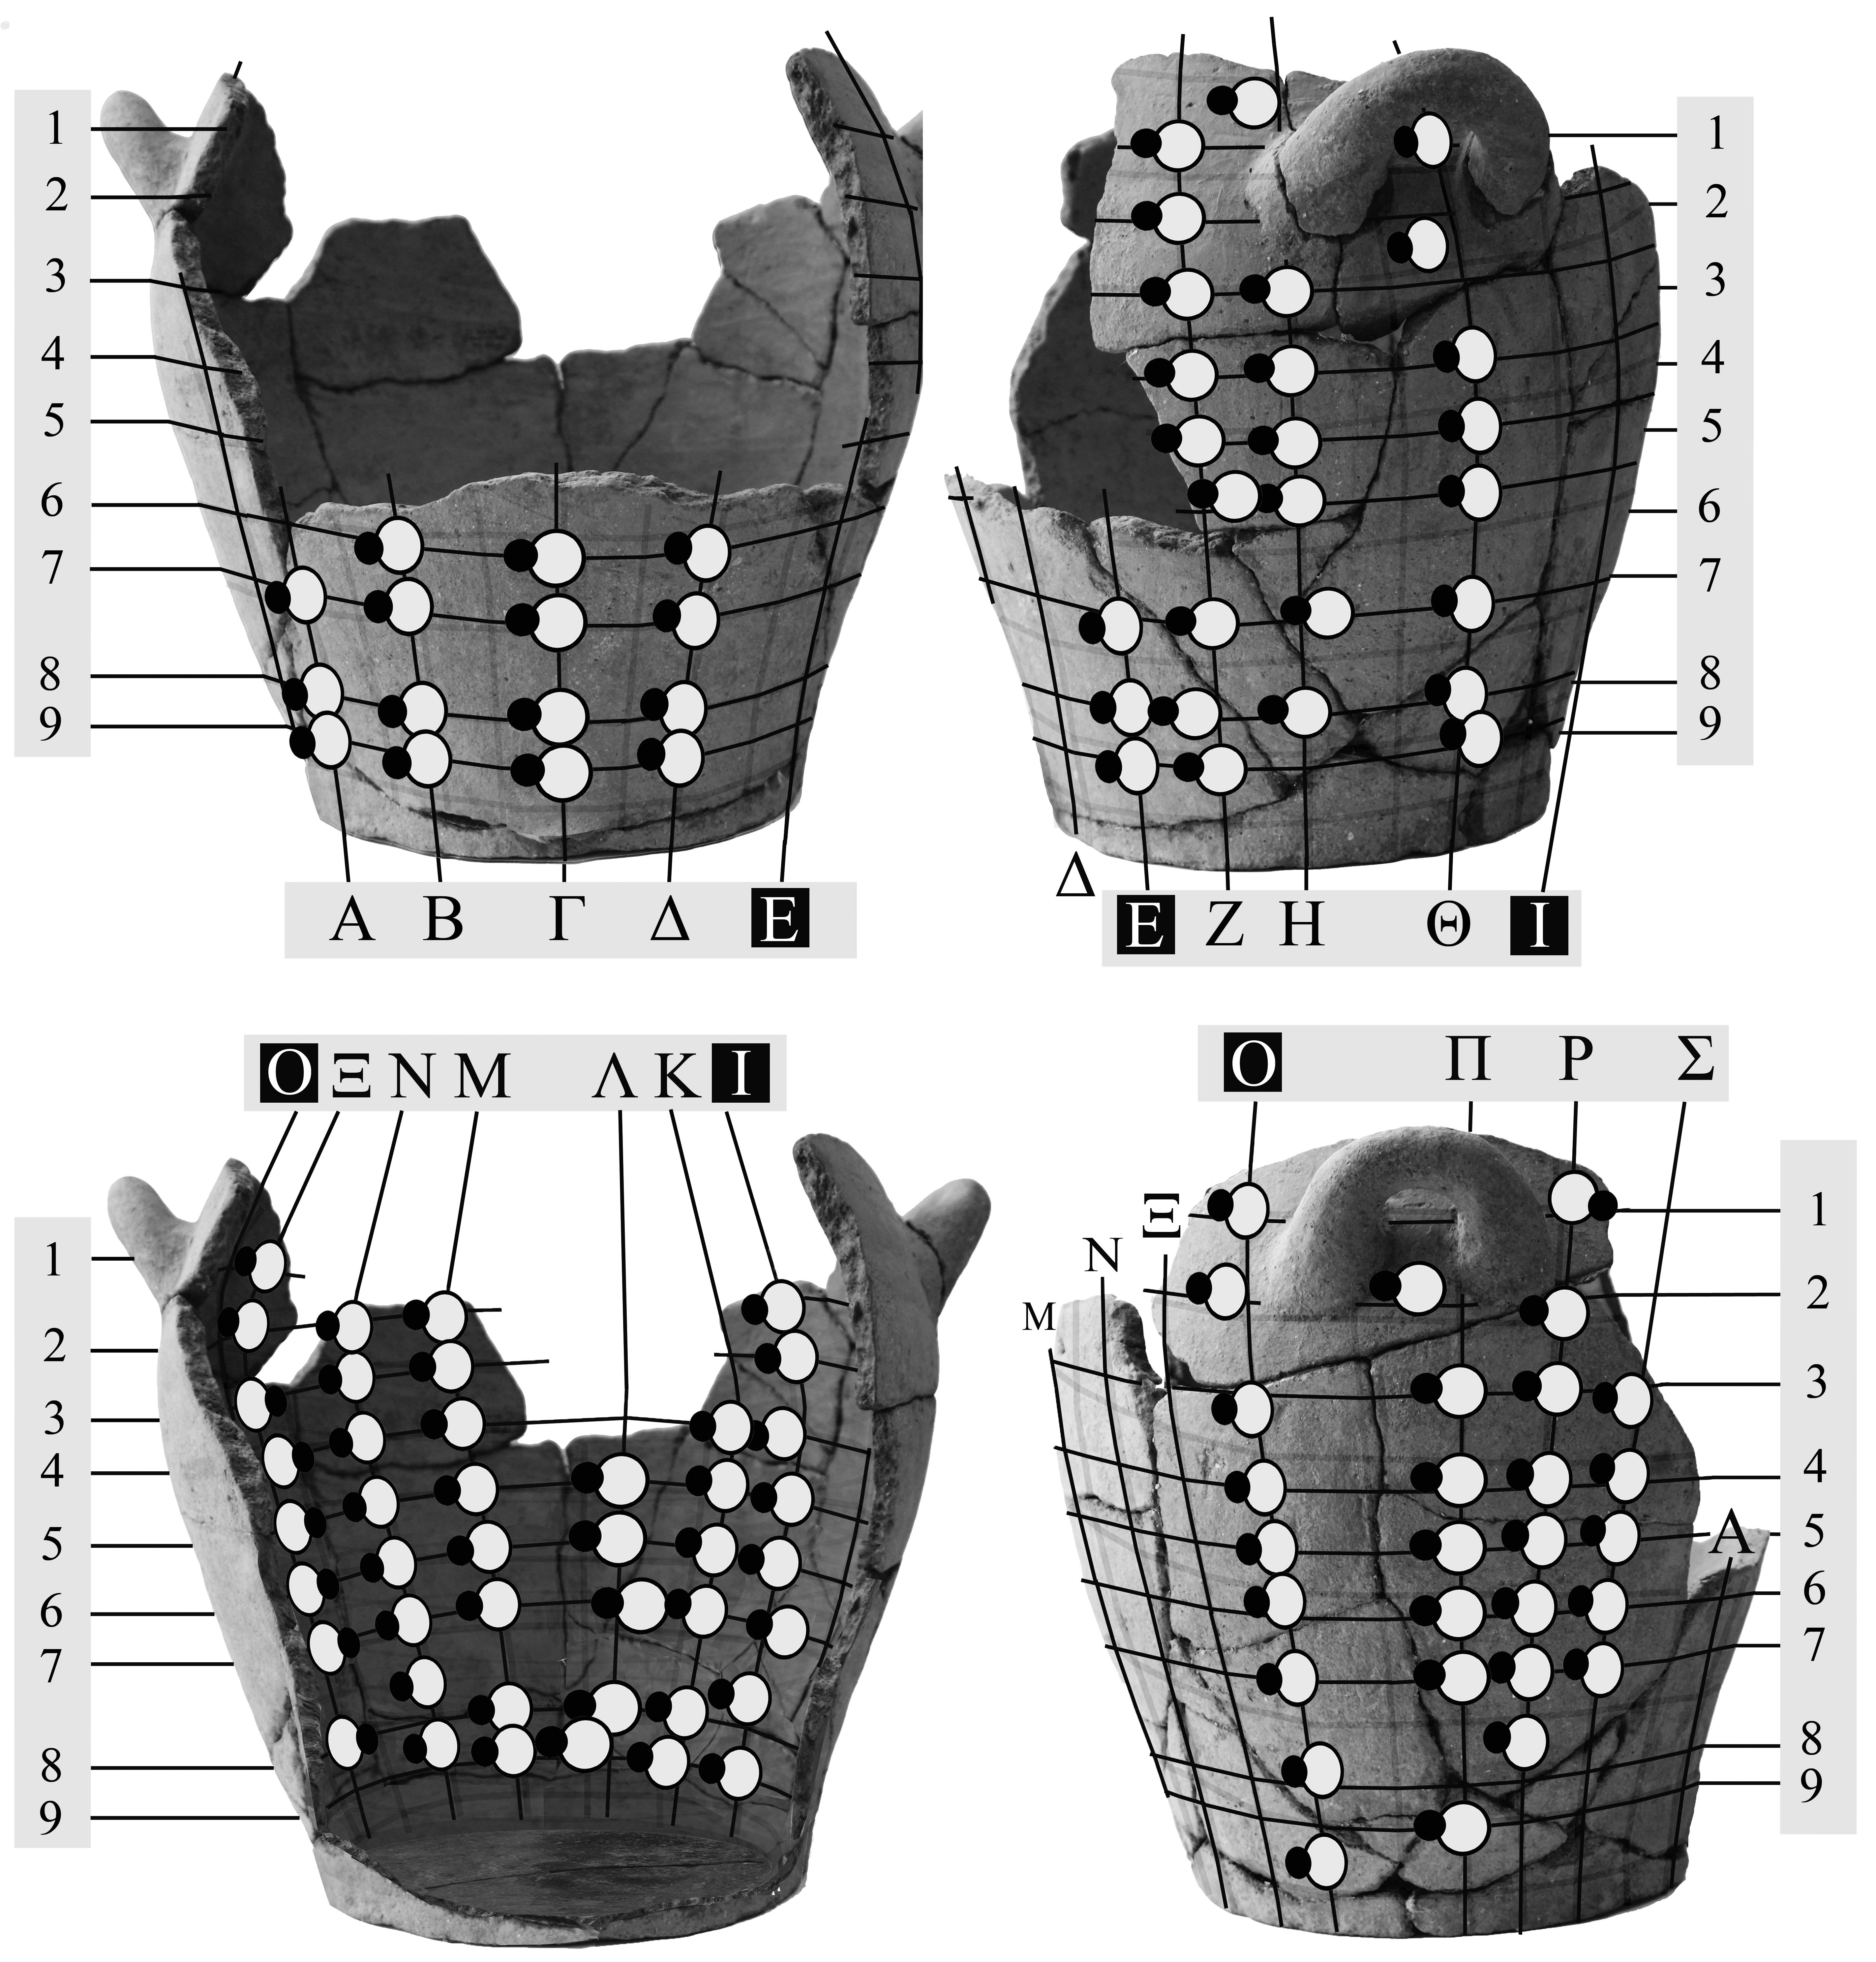


| **Vase 2** | |
| --- | --- |
| **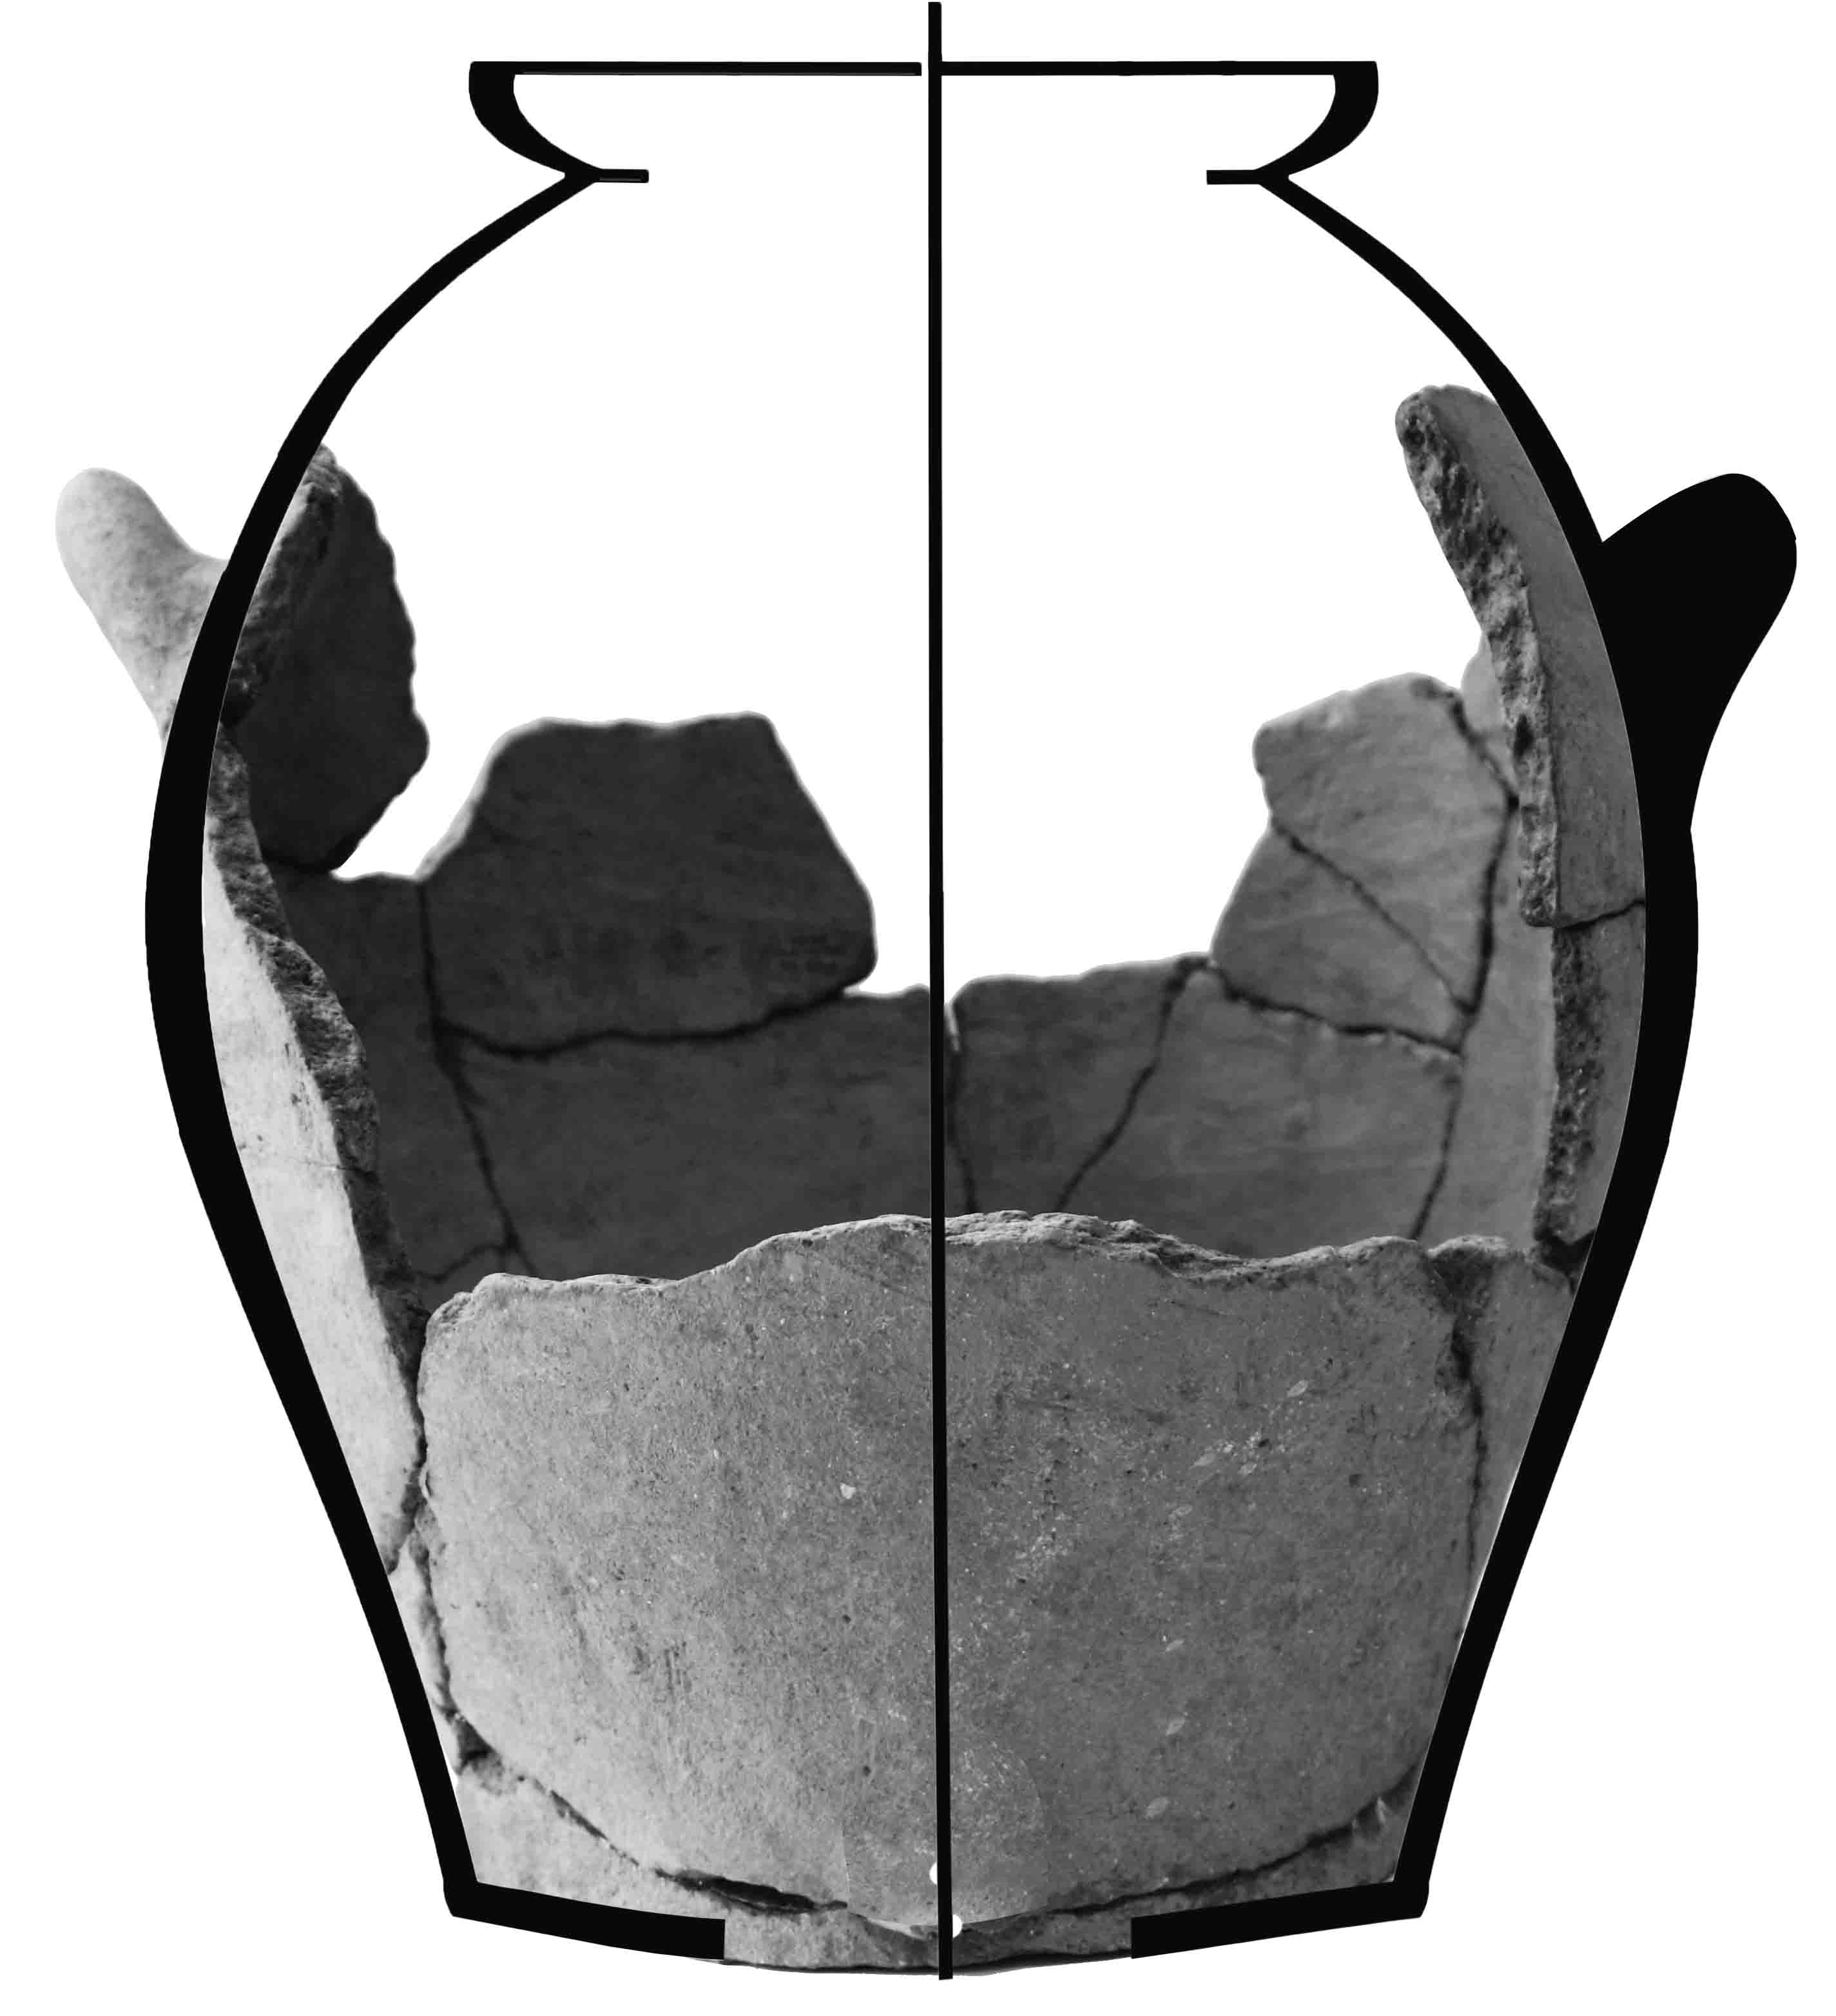** | |
|  | | | | | | | | |
| **A** | **Β** | **Γ** | **Δ** | **Ε** | **Ζ** | **Η** | **Θ** | **Ι** |
| **1** | **Βy** (±1nΤ) |  |  |  |  |  | **35** | **29** | **34** |  |
| **Bx**(±1nΤ) | **-13** | **-2** | **19** |
| **Bz**(±1nΤ) | **19** | **11** | **17** |
| **B**(±1nΤ) | **42** | **31** | **42** |
| **θΒο** | **33±**1 | **21±**2 | **37±**1 |
| **φΒο** | **124±**2 | **100±**5 | **42±**2 |
| **2** | **Βy** (±1nΤ) |  |  |  |  |  | **38** |  |  | **32** |
| **Bx**(±1nΤ) | **-15** | **51** |
| **Bz**(±1nΤ) | **32** | **43** |
| **B**(±1nΤ) | **52** | **74** |
| **θΒο** | **43±**1 | **64±**1 |
| **φΒο** | **115±**2 | **40±**1 |
| **3** | **Βy** (±1nΤ) |  |  |  |  |  | **38** | **41** | **37** | **25** |
| **Bx**(±1nΤ) | **-24** | **-5** | **25** | **65** |
| **Bz**(±1nΤ) | **44** | **41** | **44** | **59** |
| **B**(±1nΤ) | **63** | **58** | **63** | **91** |
| **θΒο** | **53±**1 | **45±**1 | **54±**1 | **74±**1 |
| **φΒο** | **119±**1 | **97±**1 | **60±**1 | **42±**1 |
| **4** | **Βy** (±1nΤ) |  |  |  |  |  | **37** | **33** | **29** | **20** |
| **Bx**(±1nΤ) | **-27** | **-17** | **36** | **61** |
| **Bz**(±1nΤ) | **71** | **72** | **70** | **73** |
| **B**(±1nΤ) | **84** | **81** | **84** | **97** |
| **θΒο** | **64±**  1 | **66±**1 | **70±**  1 | **78±**1 |
| **φΒο** | **111±**1 | **103±**1 | **63±**1 | **50±**1 |
| **5** | **Βy** (±1nΤ) |  |  |  |  |  | **34** | **33** | **25** | **16** |
| **Bx**(±1nΤ) | **-32** | **-12** | **35** | **59** |
| **Bz**(±1nΤ) | **81** | **77** | **82** | **75** |
| **B**(±1nΤ) | **93** | **85** | **93** | **97** |
| **θΒο** | **69±**1 | **67±**1 | **74±**1 | **80±**1 |
| **φΒο** | **112±**1 | **99±**1 | **67±**1 | **52±**1 |

**Table 8a.** *Indicative sensor readings with the x-sensor oriented in the grooves’ direction on the body fragments of* ***vase 2.***

**
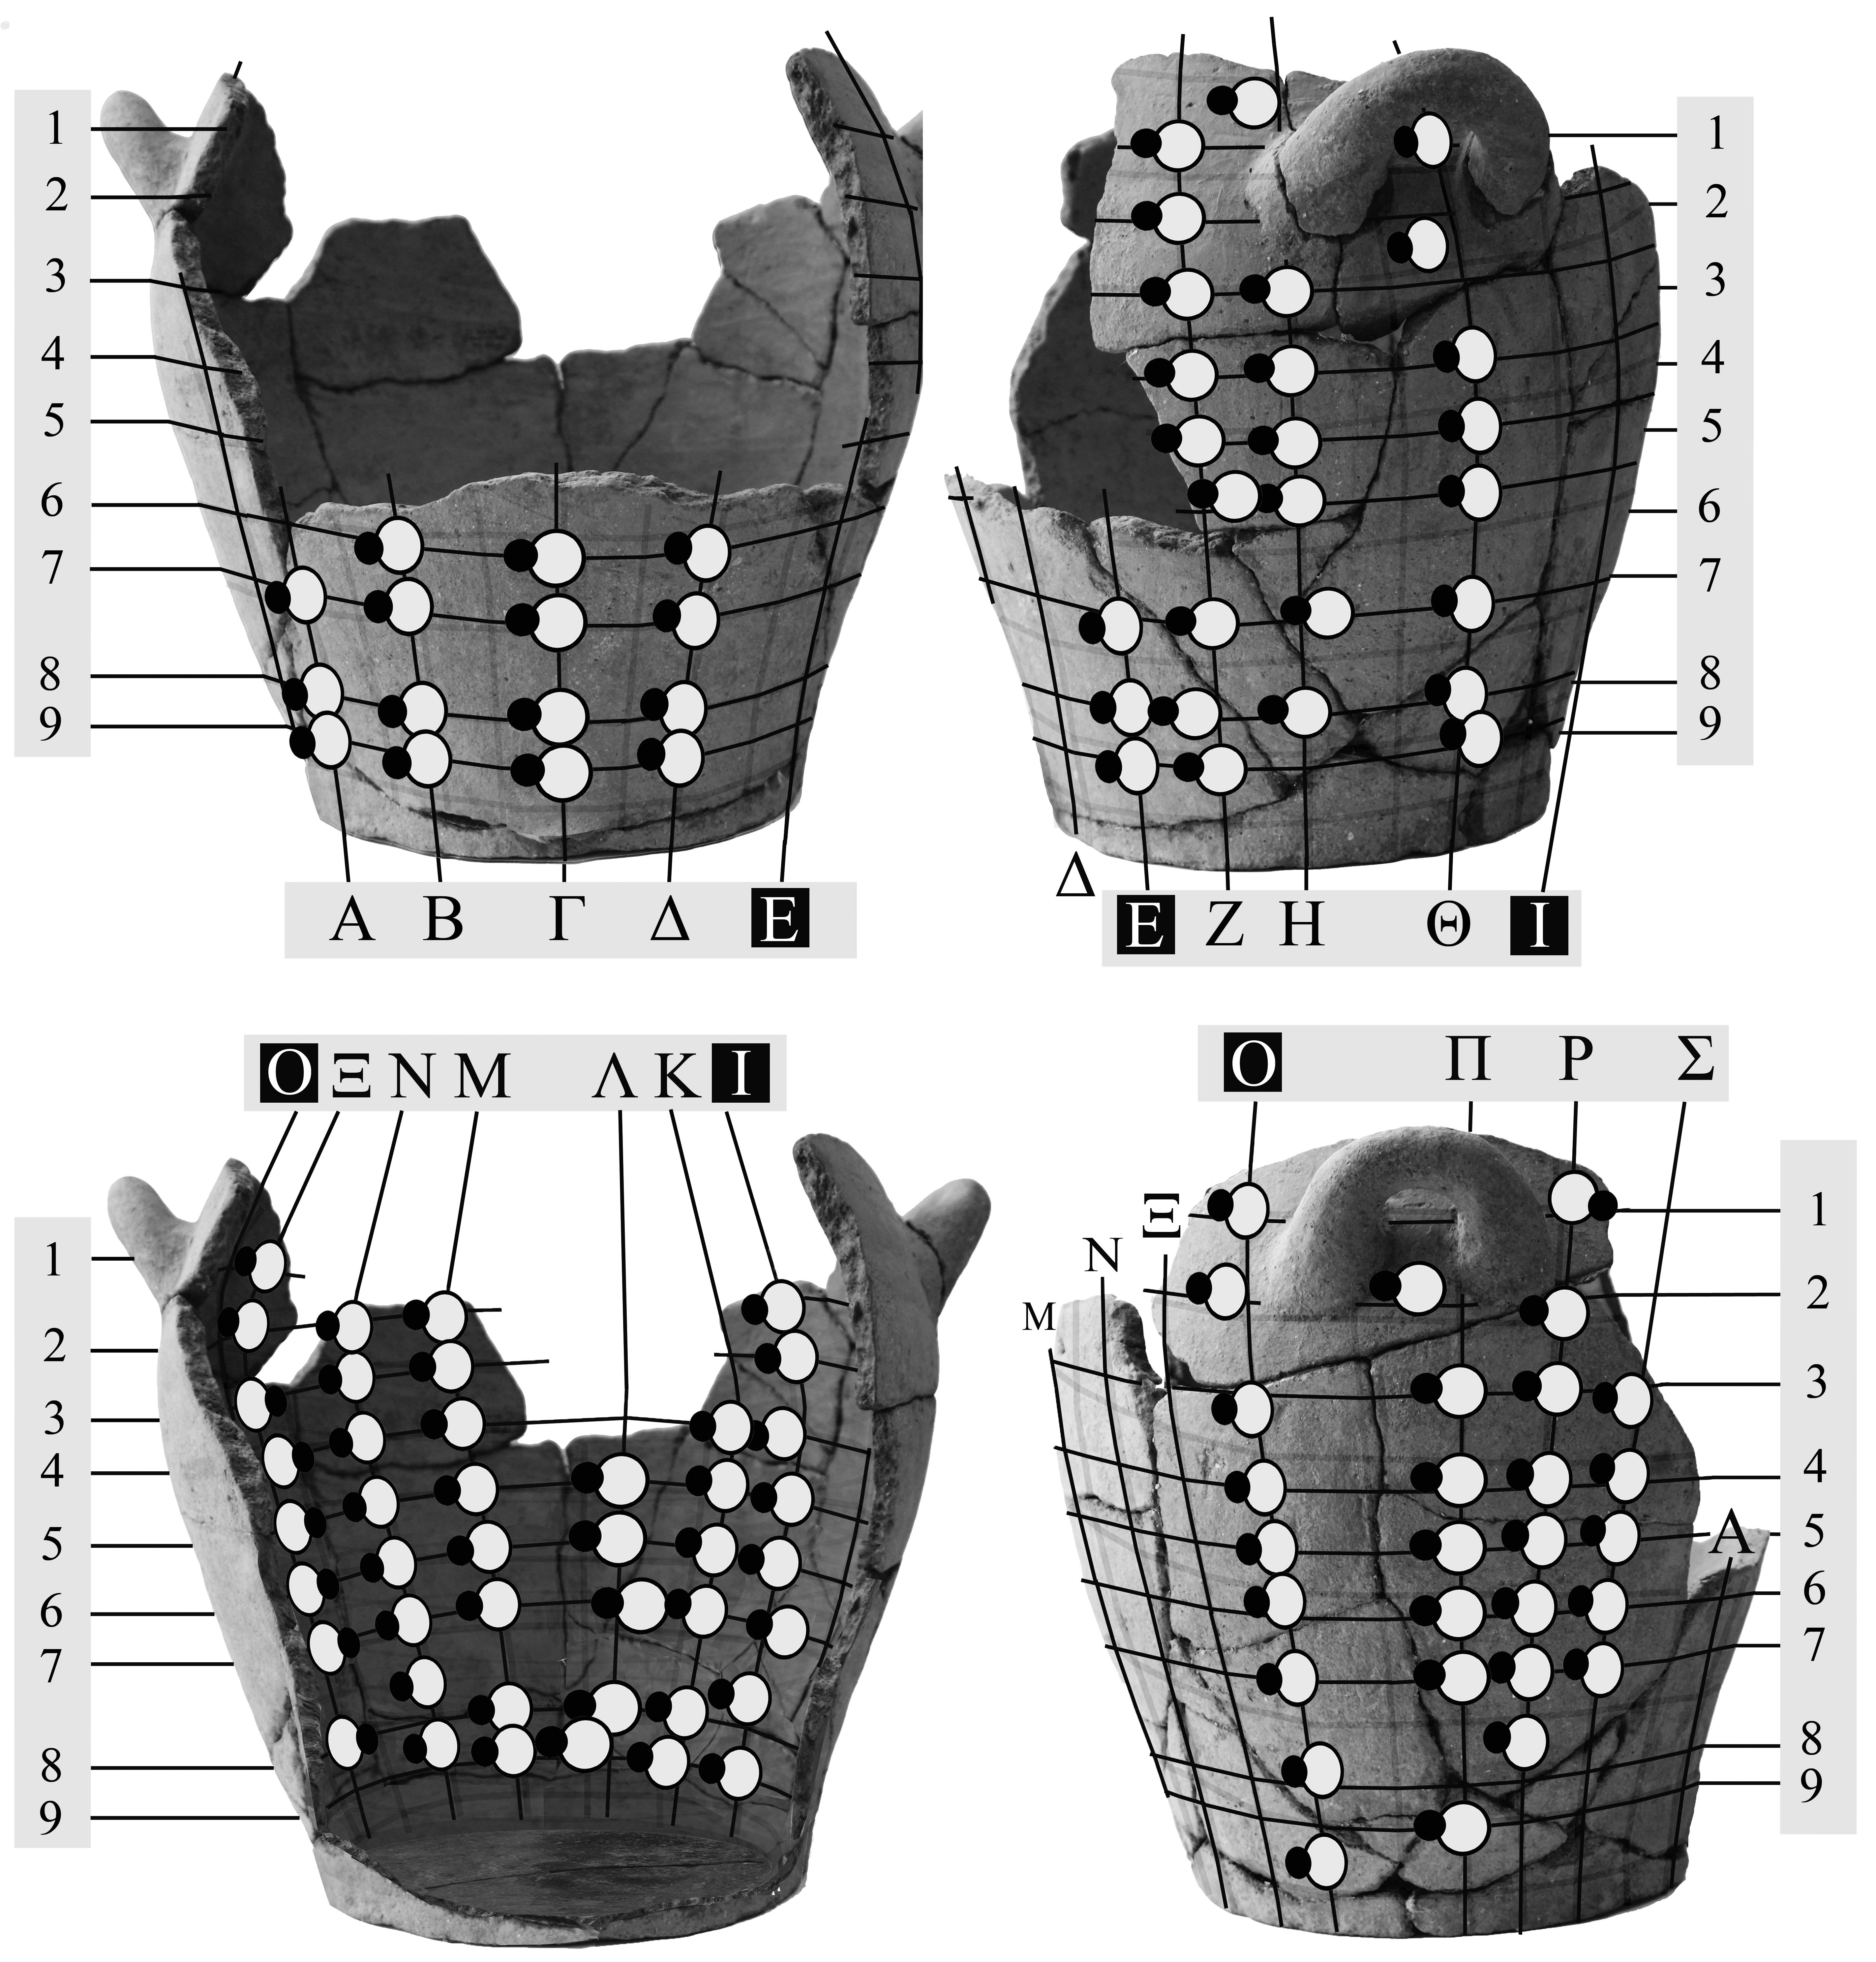
**

| **Vase 2** | |  | | | | | | | | |
| --- | --- | --- | --- | --- | --- | --- | --- | --- | --- | --- |
| 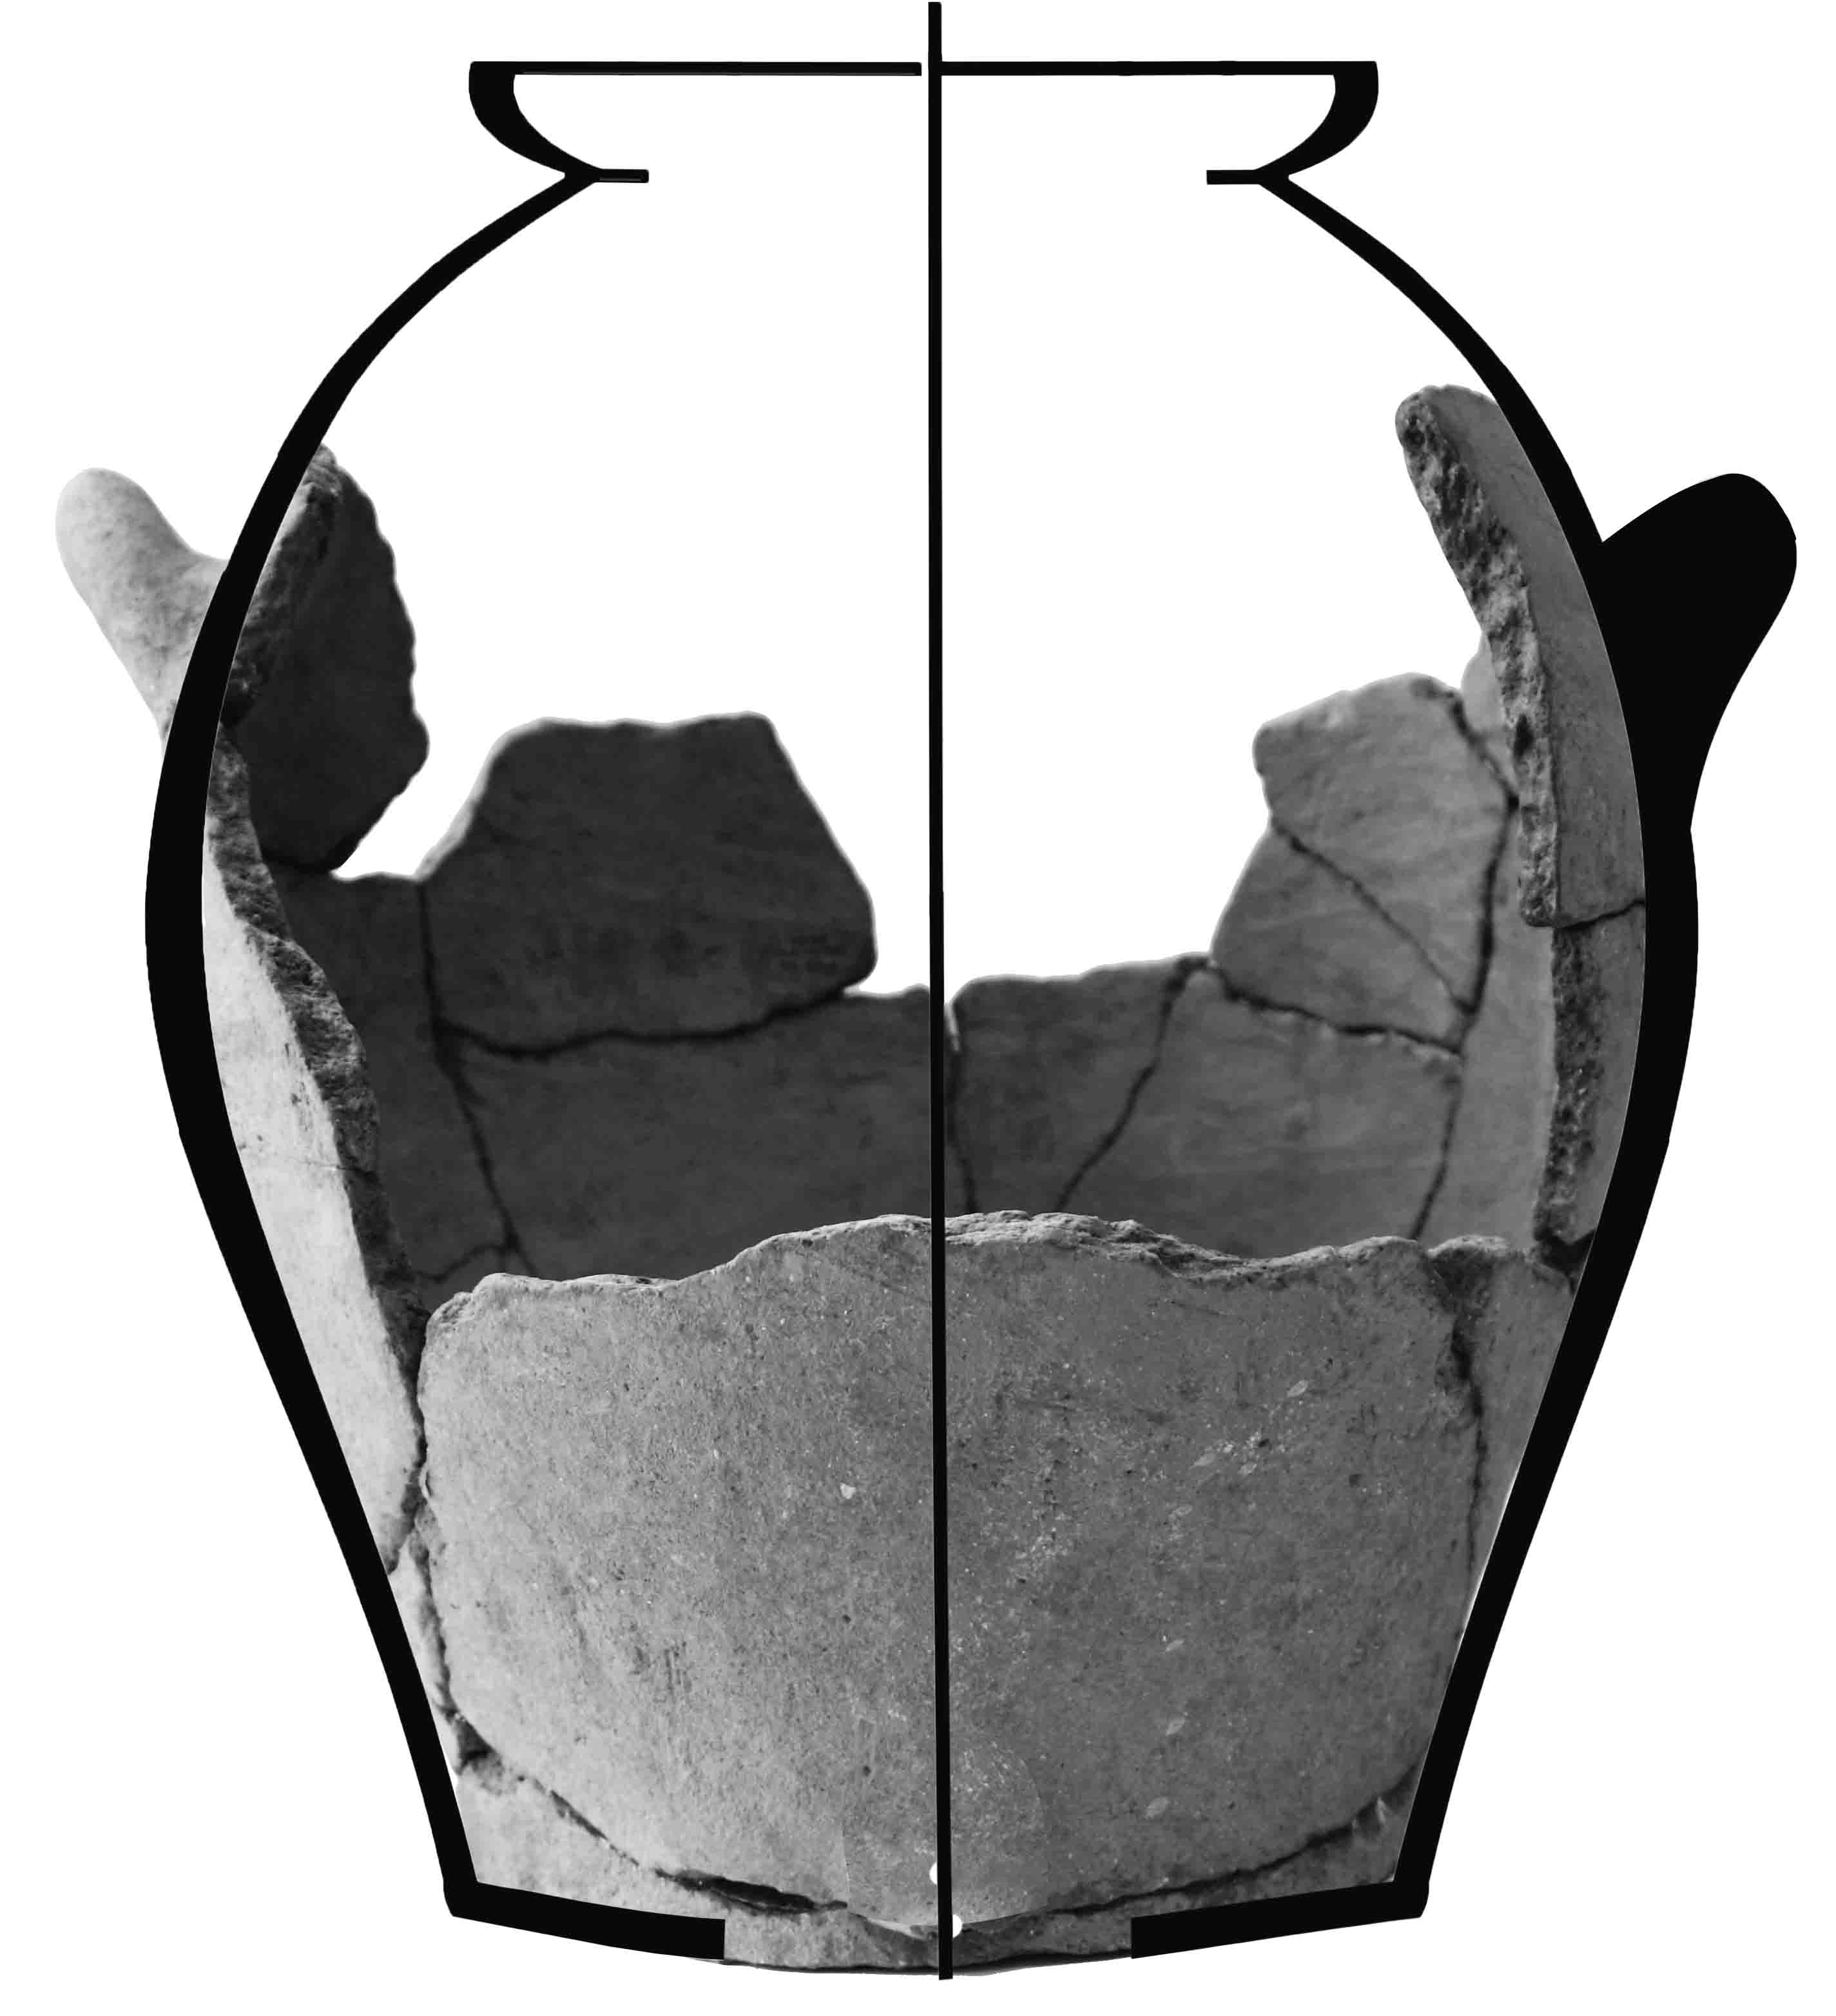 | |
| **Α** | **Β** | **Γ** | **Δ** | **Ε** | **Ζ** | **Η** | **Θ** | **Ι** |
| **6** | **Βy** (±1nΤ) |  | **-29** | **-8** | **8** |  | **23** | **27** | **23** | **18** |
| **Bx**(±1nΤ) | **-75** | **-83** | **-75** | **-38** | **-5** | **31** | **56** |
| **Bz**(±1nΤ) | **53** | **66** | **78** | **87** | **78** | **84** | **81** |
| **B**(±1nΤ) | **96** | **106** | **109** | **98** | **83** | **92** | **100** |
| **θΒο** | **-72±**1 | **-86±**1 | **86±**1 | **76±**1 | **71±**1 | **76±**1 | **80±**1 |
| **φΒο** | **145±**1 | **142±**1 | **134±**1 | **114±**1 | **94±**1 | **70±**1 | **55±**1 |
| **7** | **Βy** (±1nΤ) | **-33** | **-25** | **-15** | **5** | **20** | **22** | **25** | **22** | **10** |
| **Bx**(±1nΤ) | **-37** | **-76** | **-82** | **-70** | **-42** | **-22** | **-10** | **26** | **67** |
| **Bz**(±1nΤ) | **24** | **53** | **61** | **73** | **87** | **91** | **83** | **89** | **80** |
| **B**(±1nΤ) | **55** | **96** | **103** | **101** | **99** | **96** | **87** | **95** | **105** |
| **θΒο** | **-53±**1 | **-75±**1 | **-82±**1 | **87±**1 | **78±**1 | **77±**1 | **73±**1 | **77±**1 | **85±**1 |
| **φΒο** | **147±**1 | **145±**1 | **143±**1 | **134±**1 | **116±**1 | **104±**1 | **97±**1 | **74±**1 | **50±**1 |
| **8** | **Βy** (±1nΤ) | **-35** | **-27** | **-9** | **7** | **22** | **25** | **29** | **26** | **11** |
| **Bx**(±1nΤ) | **-42** | **-66** | **-81** | **-67** | **-44** | **-33** | **-16** | **23** | **64** |
| **Bz**(±1nΤ) | **31** | **45** | **64** | **77** | **83** | **86** | **84** | **89** | **72** |
| **B**(±1nΤ) | **63** | **84** | **104** | **102** | **96** | **95** | **90** | **96** | **97** |
| **θΒο** | **-56±**1 | **-71±**1 | **-85±**1 | **86±**1 | **77±**1 | **75±**1 | **71±**1 | **74±**1 | **83±**1 |
| **φΒο** | **144±**1 | **146±**1 | **142±**1 | **131±**1 | **118±**1 | **111±**1 | **101±**1 | **76±**1 | **48±**1 |
| **9** | **Βy** (±1nΤ) | **-30** | **-24** | **-1** | **13** | **26** | **28** |  | **28** | **16** |
| **Bx**(±1nΤ) | **-35** | **-70** | **-80** | **-78** | **-50** | **-27** | **29** | **65** |
| **Bz**(±1nΤ) | **32** | **54** | **67** | **78** | **76** | **68** | **77** | **75** |
| **B**(±1nΤ) | **56** | **92** | **104** | **111** | **95** | **78** | **87** | **101** |
| **θΒο** | **-58±**1 | **-75±**1 | **-89±**1 | **83±**1 | **74±**1 | **69±**1 | **71±**1 | **81±**1 |
| **φΒο** | **138±**1 | **142±**1 | **140**1 | **135±**1 | **123±**1 | **112±**1 | **69±**1 | **49±**1 |

**Table 8b.** *Indicative sensor readings with the x-sensor oriented in the grooves’ direction on the body fragments of* ***vase 2.***


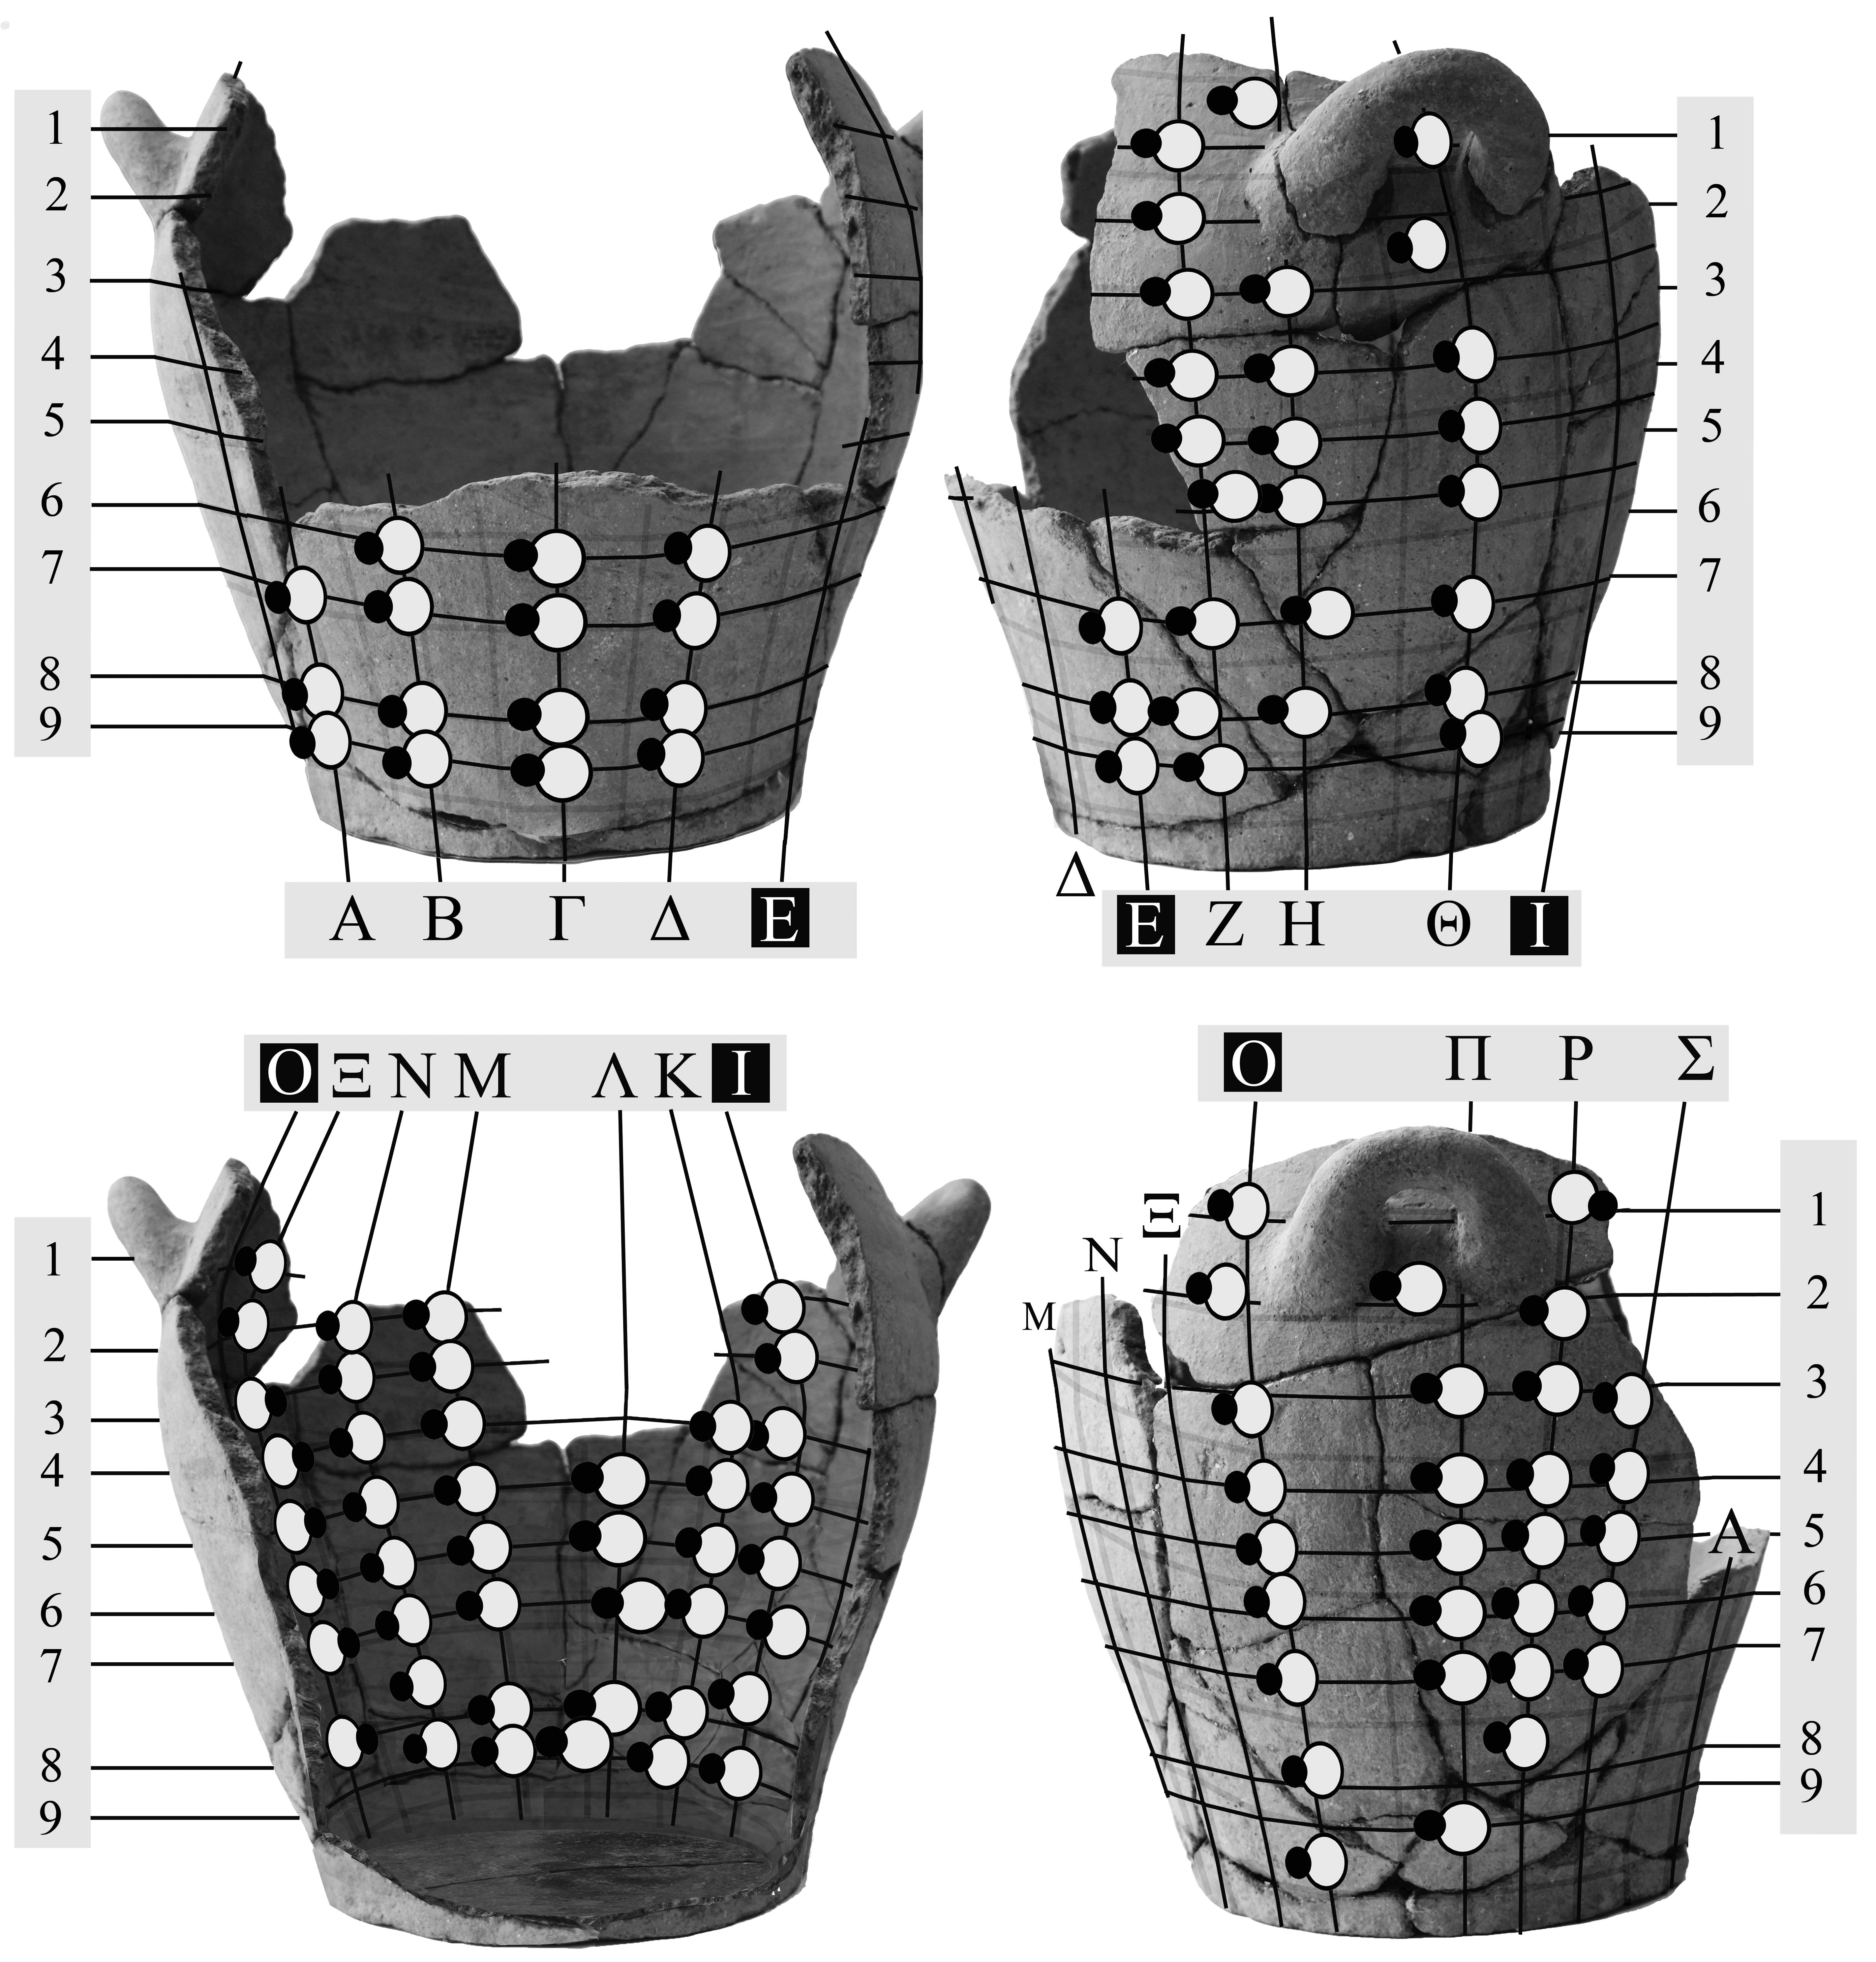


| **Vase 2** | |  | | | | | | | | |
| --- | --- | --- | --- | --- | --- | --- | --- | --- | --- | --- |
| 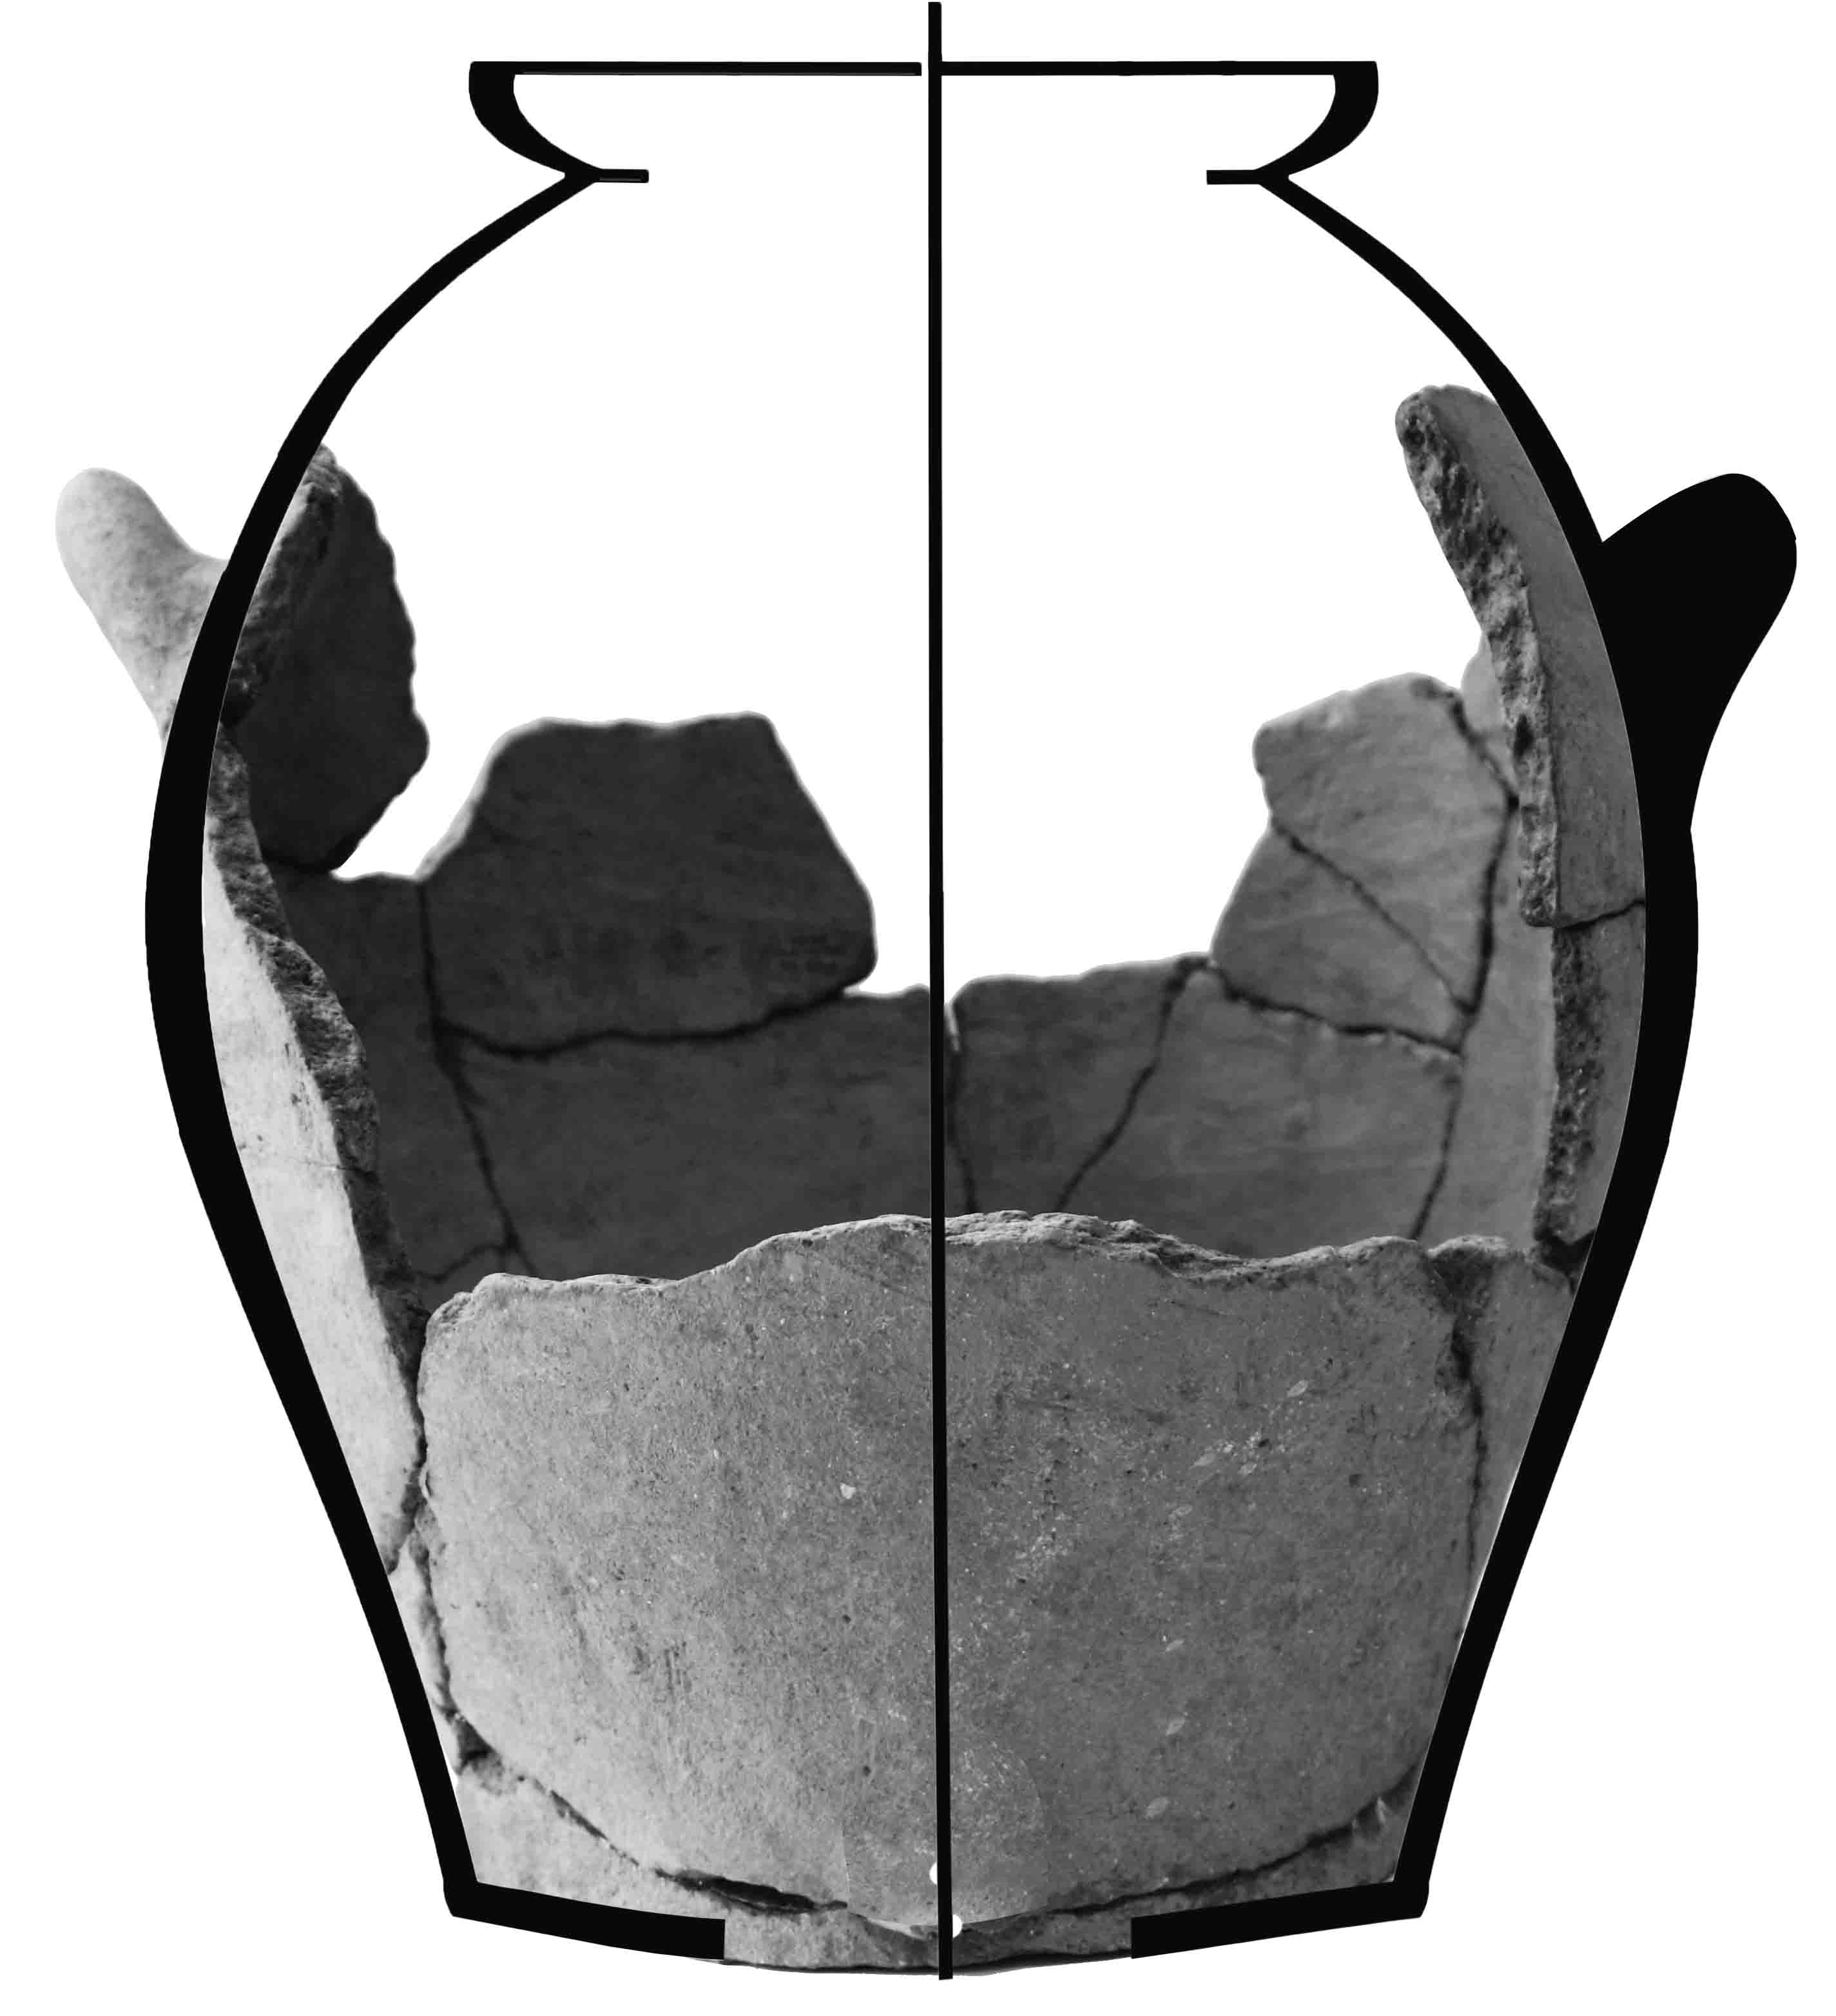 | |
| **Κ** | **Λ** | **Μ** | **Ν** | **Ξ** | **Ο** | **Π** | **Ρ** | **Σ** |
| **1** | **Βy** (±1nΤ) |  |  |  |  | **-14** | **-17** |  | **-23** |  |
| **Bx**(±1nΤ) | **59** | **45** | **-13** |
| **Bz**(±1nΤ) | **83** | **90** | **89** |
| **B**(±1nΤ) | **103** | **102** | **93** |
| **θΒο** | **-82±**1 | **-80±**1 | **-76±**1 |
| **φΒο** | **55±**1 | **63±**1 | **98±**1 |
| **2** | **Βy** (±1nΤ) |  |  | **-1** | **-10** | **-20** | **-29** | **-30** | **-31** |  |
| **Bx**(±1nΤ) | **82** | **70** | **63** | **42** | **8** | **-19** |
| **Bz**(±1nΤ) | **70** | **71** | **76** | **74** | **73** | **66** |
| **B**(±1nΤ) | **108** | **100** | **101** | **90** | **79** | **75** |
| **θΒο** | **-89±**1 | **-84±**1 | **-79±**1 | **-71±**1 | **-68±**1 | **-66±**1 |
| **φΒο** | **40±**1 | **45±**1 | **50±**1 | **60±**1 | **84±**1 | **106±**1 |
| **3** | **Βy** (±1nΤ) |  |  | **-6** | **-12** | **-22** | **-26** | **-33** | **-30** | **-30** |
| **Bx**(±1nΤ) | **78** | **77** | **60** | **46** | **4** | **-23** | **-33** |
| **Bz**(±1nΤ) | **69** | **73** | **67** | **66** | **67** | **68** | **61** |
| **B**(±1nΤ) | **104** | **107** | **93** | **85** | **75** | **78** | **76** |
| **θΒο** | **-87±**1 | **-84±**1 | **-76±**1 | **-72±**1 | **-64±**1 | **-67±**1 | **-67±**1 |
| **φΒο** | **41±**1 | **43±**1 | **48±**1 | **55±**1 | **87±**1 | **109±**1 | **118±**1 |
| **4** | **Βy** (±1nΤ) | **17** |  | **-10** | **-18** | **-30** | **-34** | **-41** | **-38** | **-39** |
| **Bx**(±1nΤ) | **68** | **81** | **76** | **65** | **44** | **1** | **-23** | **-28** |
| **Bz**(±1nΤ) | **66** | **66** | **63** | **56** | **53** | **46** | **50** | **44** |
| **B**(±1nΤ) | **96** | **105** | **100** | **91** | **77** | **62** | **67** | **65** |
| **θΒο** | **80±**1 | **-85±**1 | **-80±**1 | **-71±**1 | **-64±**1 | **-48±**1 | **-55±**1 | **-53±**1 |
| **φΒο** | **44±**1 | **39±**1 | **40±**1 | **41±**1 | **50±1** | **89±**1 | **115±**1 | **122±**1 |
| **5** | **Βy** (±1nΤ) | **6** | **-2** | **-14** | **-26** | **-32** | **-39** | **-42** | **-41** | **-38** |
| **Bx**(±1nΤ) | **74** | **77** | **80** | **70** | **59** | **38** | **-2** | **-14** | **-30** |
| **Bz**(±1nΤ) | **70** | **65** | **59** | **54** | **47** | **36** | **35** | **29** | **31** |
| **B**(±1nΤ) | **102** | **101** | **100** | **92** | **82** | **65** | **55** | **52** | **57** |
| **θΒο** | **87±**1 | **-89±**1 | **-82±**1 | **-74±**1 | **-67±**1 | **-53±**1 | **-40±**1 | **-38±**1 | **-49±**1 |
| **φΒο** | **43±**1 | **40±**1 | **36±**1 | **38±**1 | **39±**1 | **43±**1 | **93±**2 | **116±**2 | **134±**1 |

**Table 8c.** *Indicative sensor readings with the x-sensor oriented in the grooves’ direction on the body fragments of* ***vase 2.***


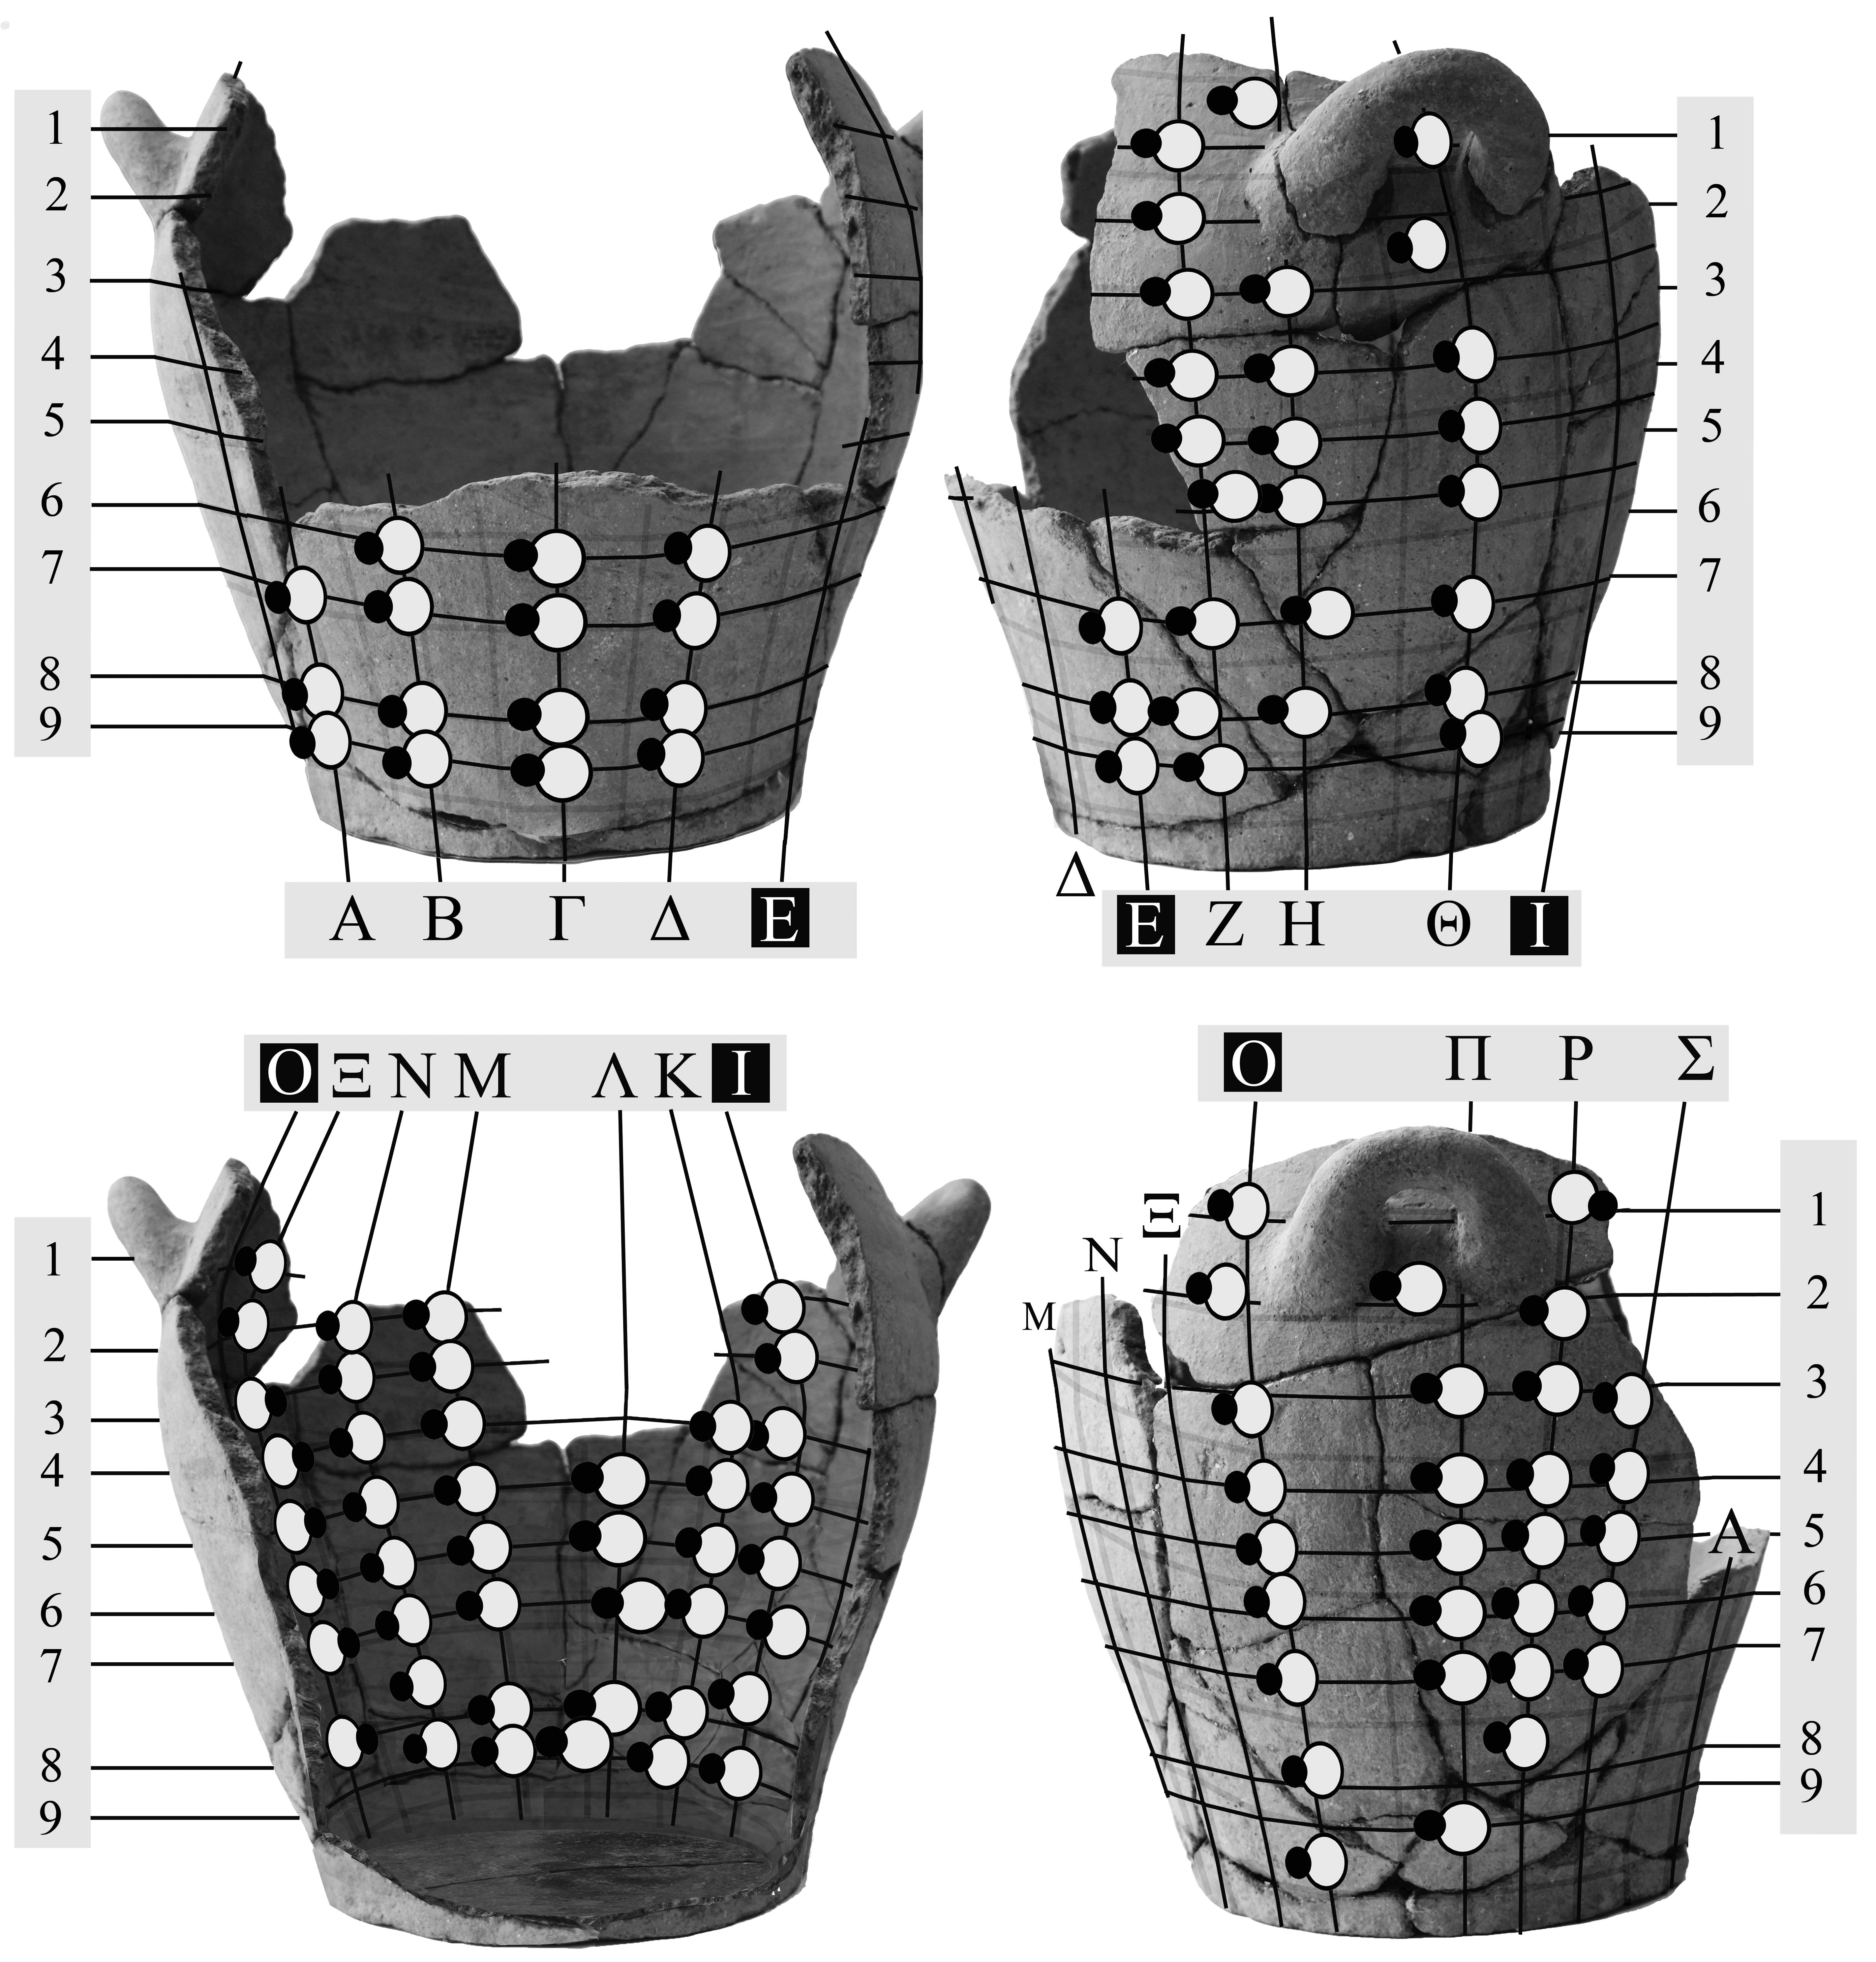


| **Vase 2** | |  | | | | | | | | |
| --- | --- | --- | --- | --- | --- | --- | --- | --- | --- | --- |
| 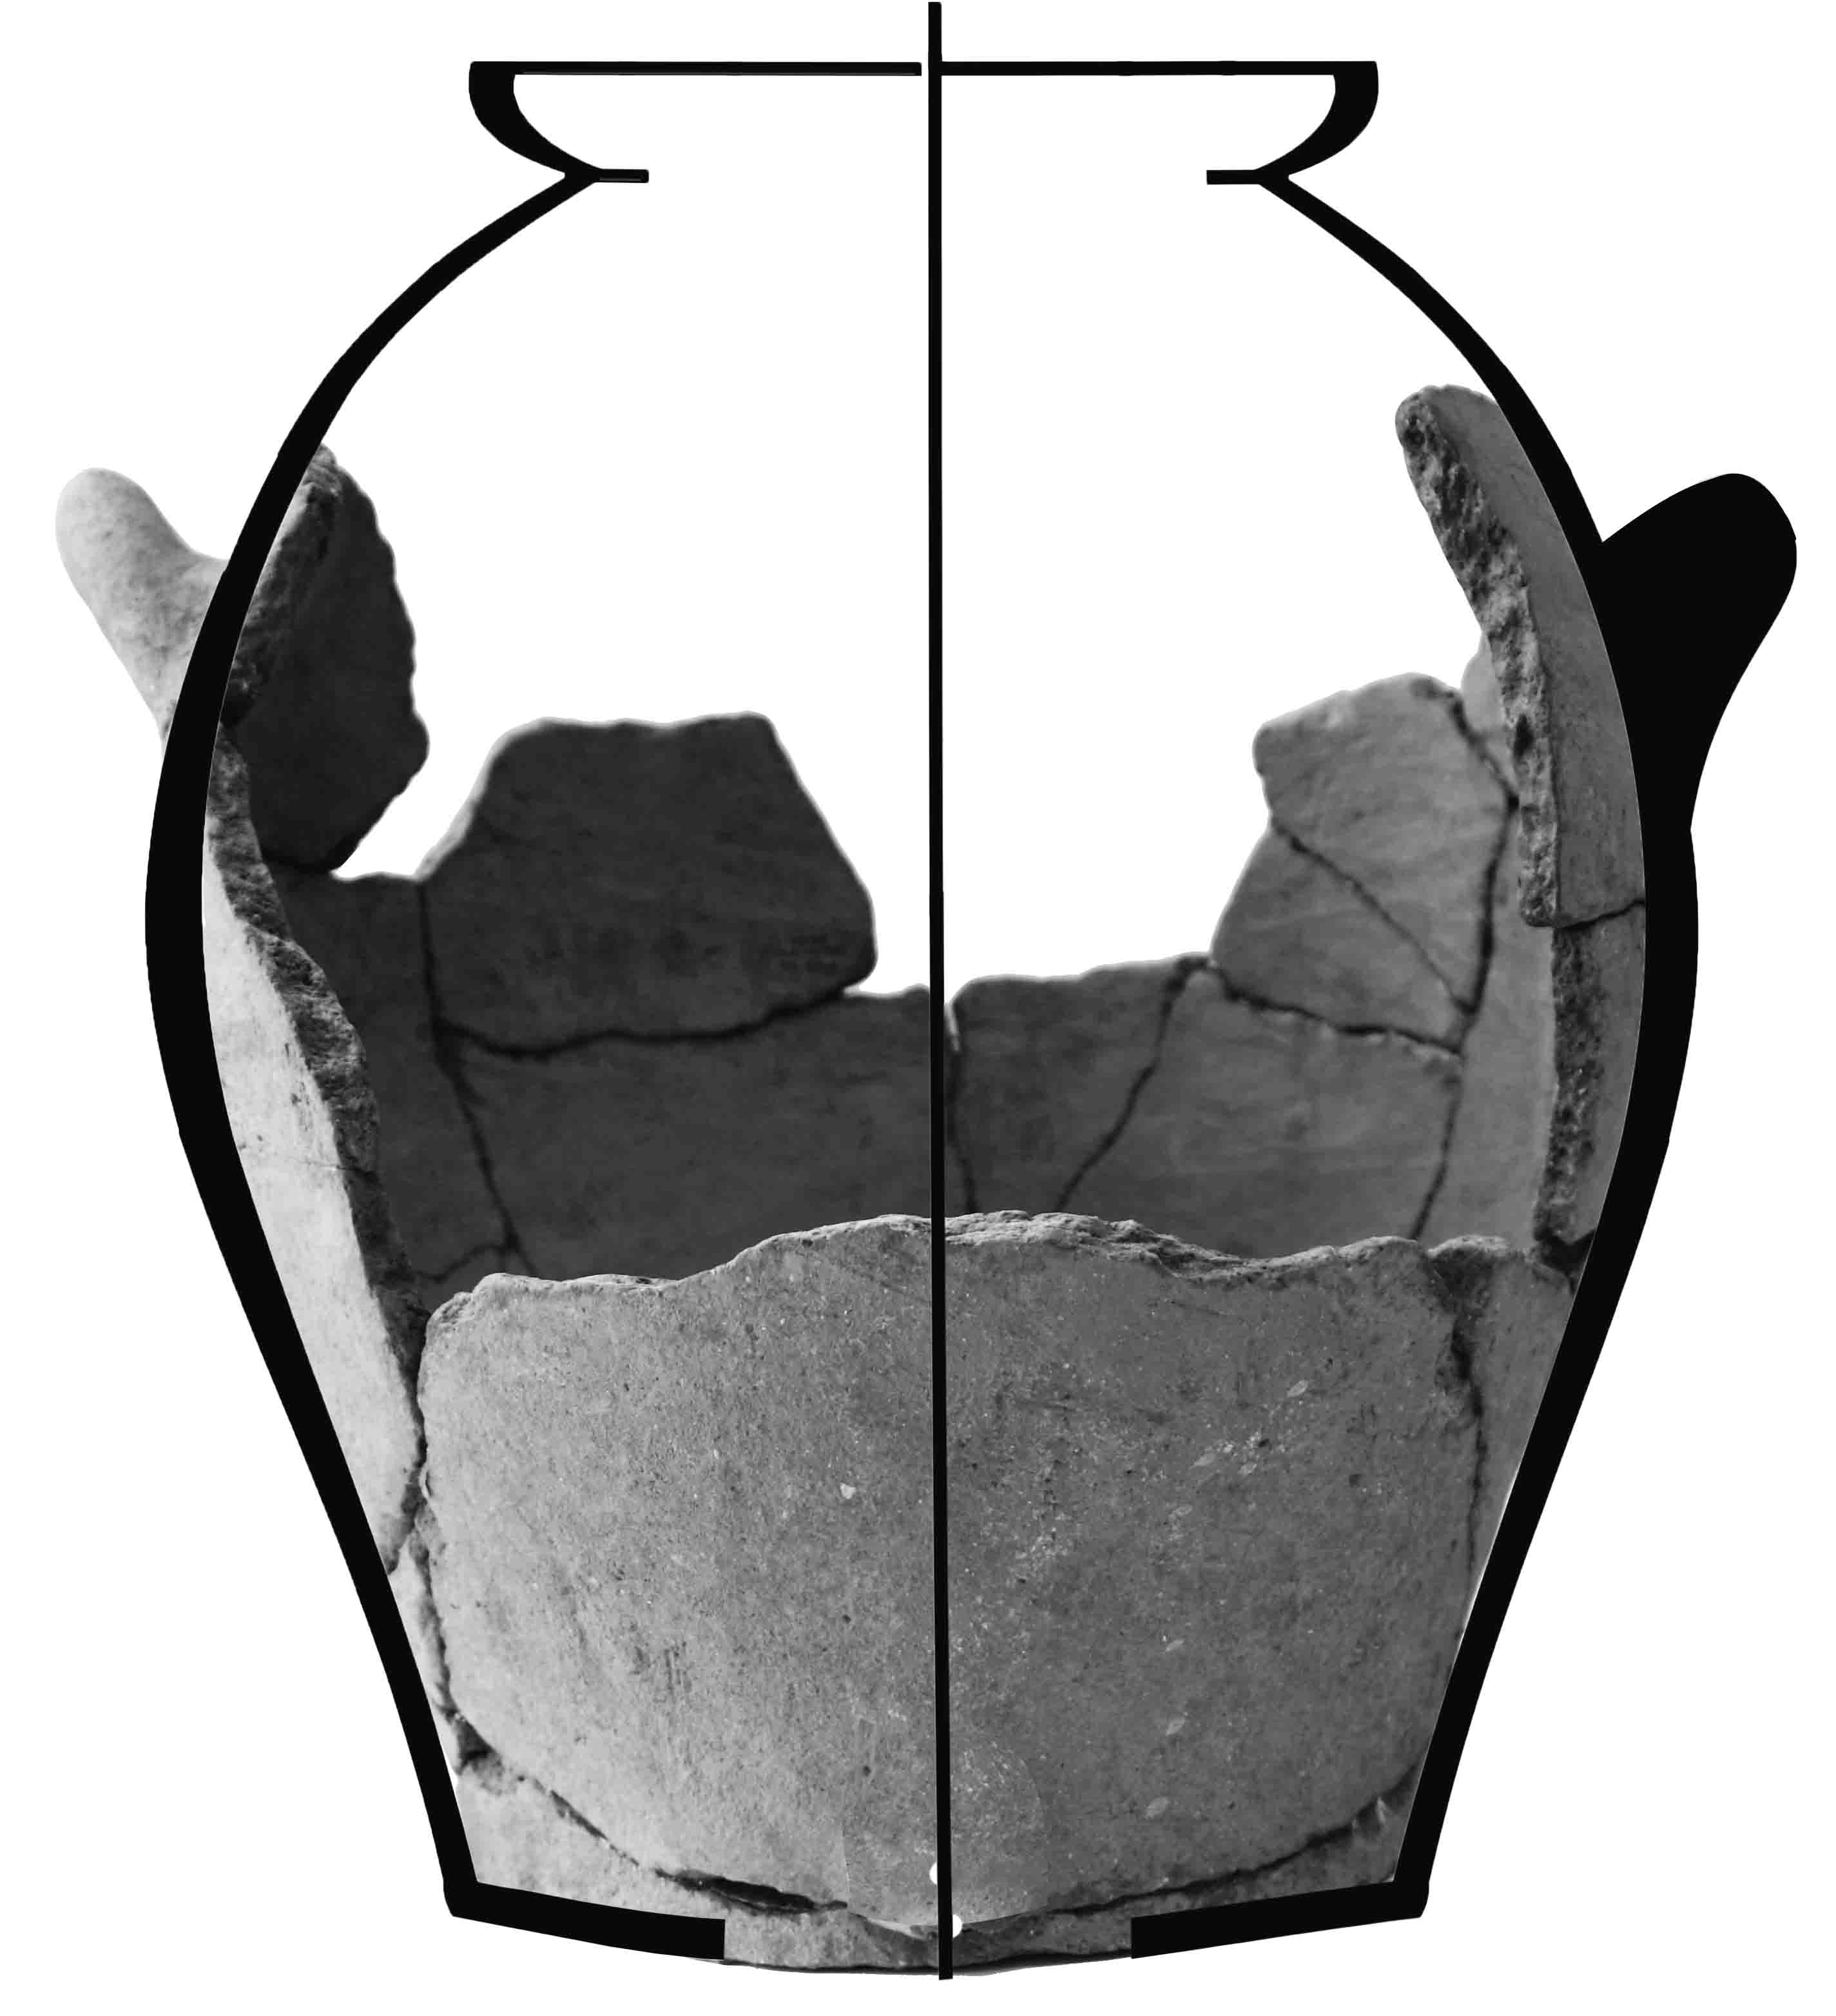 | |
| **Κ** | **Λ** | **Μ** | **Ν** | **Ξ** | **Ο** | **Π** | **Ρ** | **Σ** |
| **6** | **Βy** (±1nΤ) | **6** | **-6** | **-17** | **-25** | **-34** | **-38** | **-40** | **-40** | **-41** |
| **Bx**(±1nΤ) | **73** | **80** | **81** | **71** | **55** | **41** | **-5** | **-13** | **-25** |
| **Bz**(±1nΤ) | **76** | **68** | **57** | **49** | **42** | **34** | **23** | **23** | **30** |
| **B**(±1nΤ) | **106** | **105** | **100** | **90** | **77** | **65** | **465** | **48** | **57** |
| **θΒο** | **87±**1 | **-87±**1 | **-80±**1 | **-74±**1 | **-64±**1 | **-54±**1 | **-30±**1 | **-33±**1 | **-44±**1 |
| **φΒο** | **46±**1 | **40±**1 | **35±**1 | **35±**1 | **37±**1 | **40±**1 | **102±**2 | **119±**2 | **130±**1 |
| **7** | **Βy** (±1nΤ) | **5** | **1** | **-20** | **-27** | **-36** | **-39** | **-43** | **-39** | **-39** |
| **Bx**(±1nΤ) | **75** | **80** | **78** | **74** | **48** | **35** | **-1** | **-12** | **-26** |
| **Bz**(±1nΤ) | **74** | **74** | **50** | **48** | **33** | **29** | **19** | **23** | **23** |
| **B**(±1nΤ) | **105** | **109** | **95** | **92** | **68** | **60** | **47** | **47** | **52** |
| **θΒο** | **87±**1 | **89±**1 | **-78±**1 | **-73±**1 | **-58±**1 | **-49±**1 | **-24±**1 | **-34±**1 | **-42±**1 |
| **φΒο** | **45±**1 | **43±**1 | **33±**1 | **33±**1 | **35±**1 | **40±**1 | **93±**3 | **118±**2 | **139±**2 |
| **8** | **Βy** (±1nΤ) | **5** | **-4** | **-15** | **-25** | **-35** | **-37** |  | **-38** |  |
| **Bx**(±1nΤ) | **79** | **77** | **80** | **68** | **51** | **29** | **-11** |
| **Bz**(±1nΤ) | **73** | **63** | **58** | **48** | **35** | **31** | **28** |
| **B**(±1nΤ) | **103** | **100** | **100** | **87** | **71** | **56** | **48** |
| **θΒο** | **87±**1 | **-88±**1 | **-81±**1 | **-73±**1 | **-60±**1 | **-49±**1 | **-38±**1 |
| **φΒο** | **45±**1 | **39±**1 | **36**1 | **35±**1 | **34±**1 | **47±**1 | **111±**2 |
| **9** | **Βy** (±1nΤ) | **7** | **-4** | **-13** | **-24** |  | **-36** | **-37** |  |  |
| **Bx**(±1nΤ) | **72** | **81** | **82** | **68** | **33** | **3** |
| **Bz**(±1nΤ) | **67** | **67** | **63** | **55** | **36** | **32** |
| **B**(±1nΤ) | **99** | **105** | **104** | **91** | **61** | **49** |
| **θΒο** | **86±**1 | **-88±**1 | **-83±**1 | **-75±**1 | **-54±**1 | **-41±**1 |
| **φΒο** | **43±**1 | **40±**1 | **38±**1 | **39±**1 | **47±**1 | **85±**2 |

**Table 8d.** *Indicative sensor readings with the x-sensor oriented in the grooves’ direction on the body fragments of* ***vase 2.***


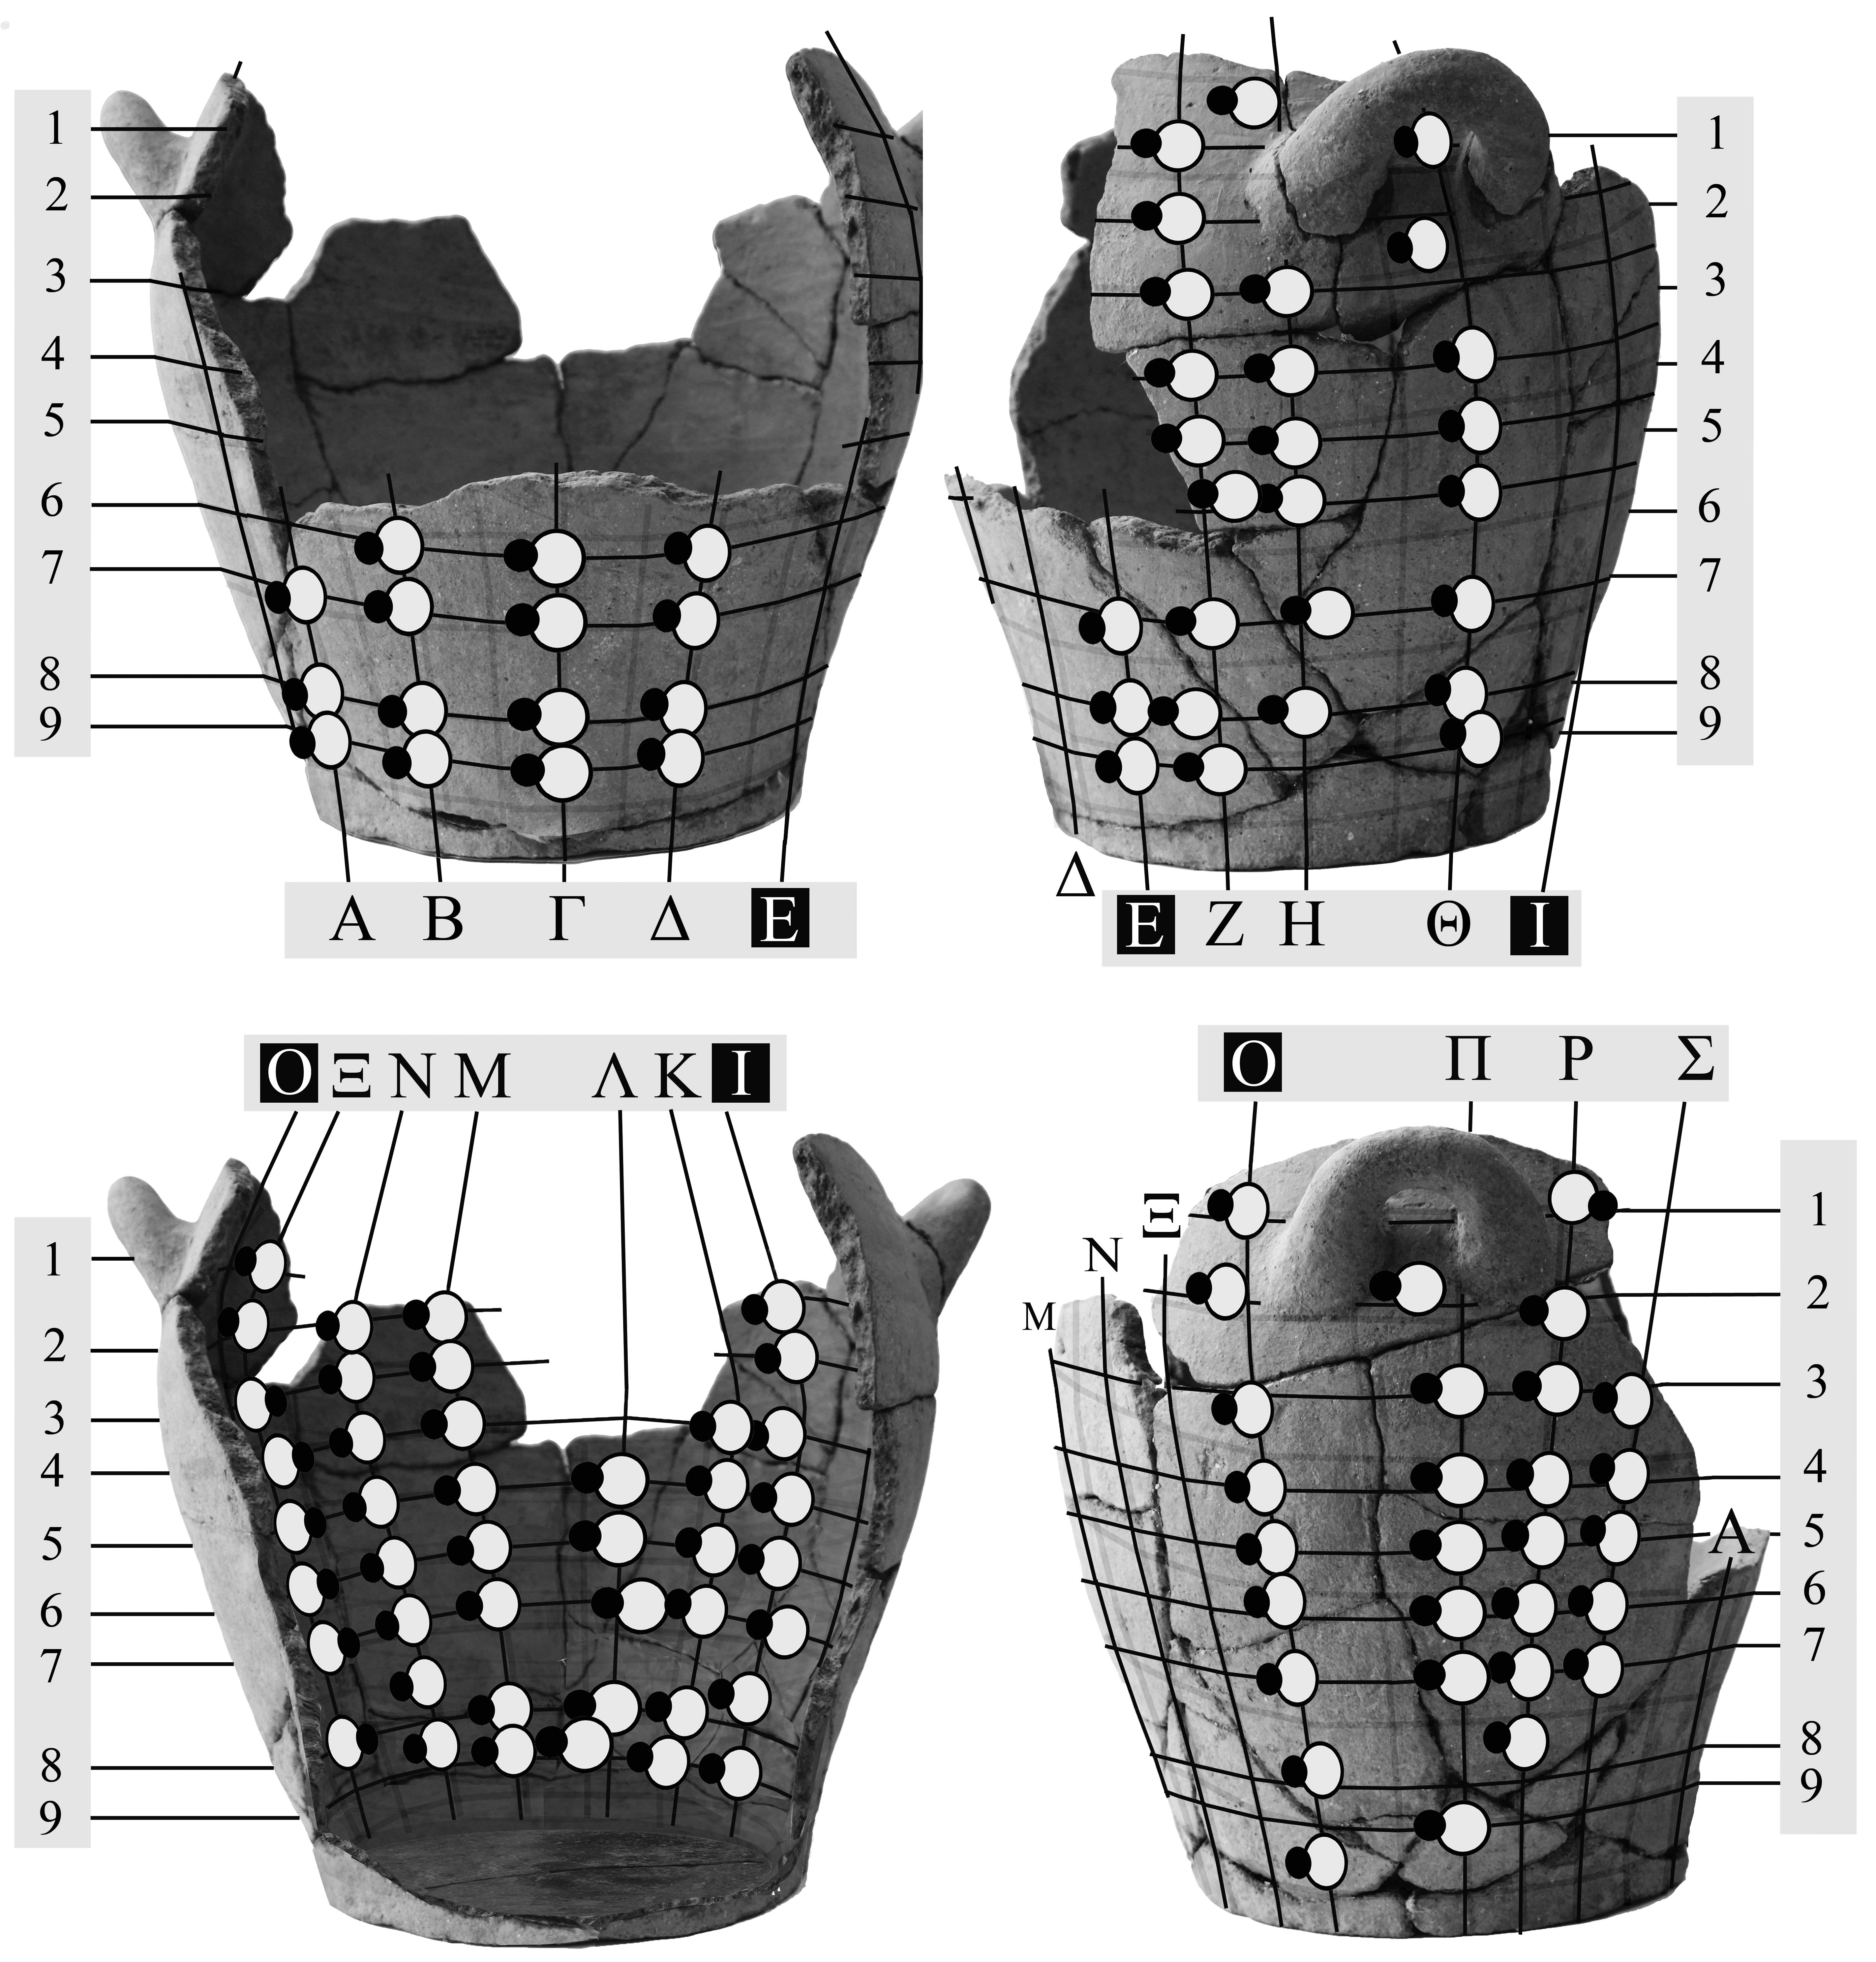


| **Vase 3** | |  | | | | | | | **αy˪**(cm) | **αx,z//**(cm) | **λ** |
| --- | --- | --- | --- | --- | --- | --- | --- | --- | --- | --- | --- |
| 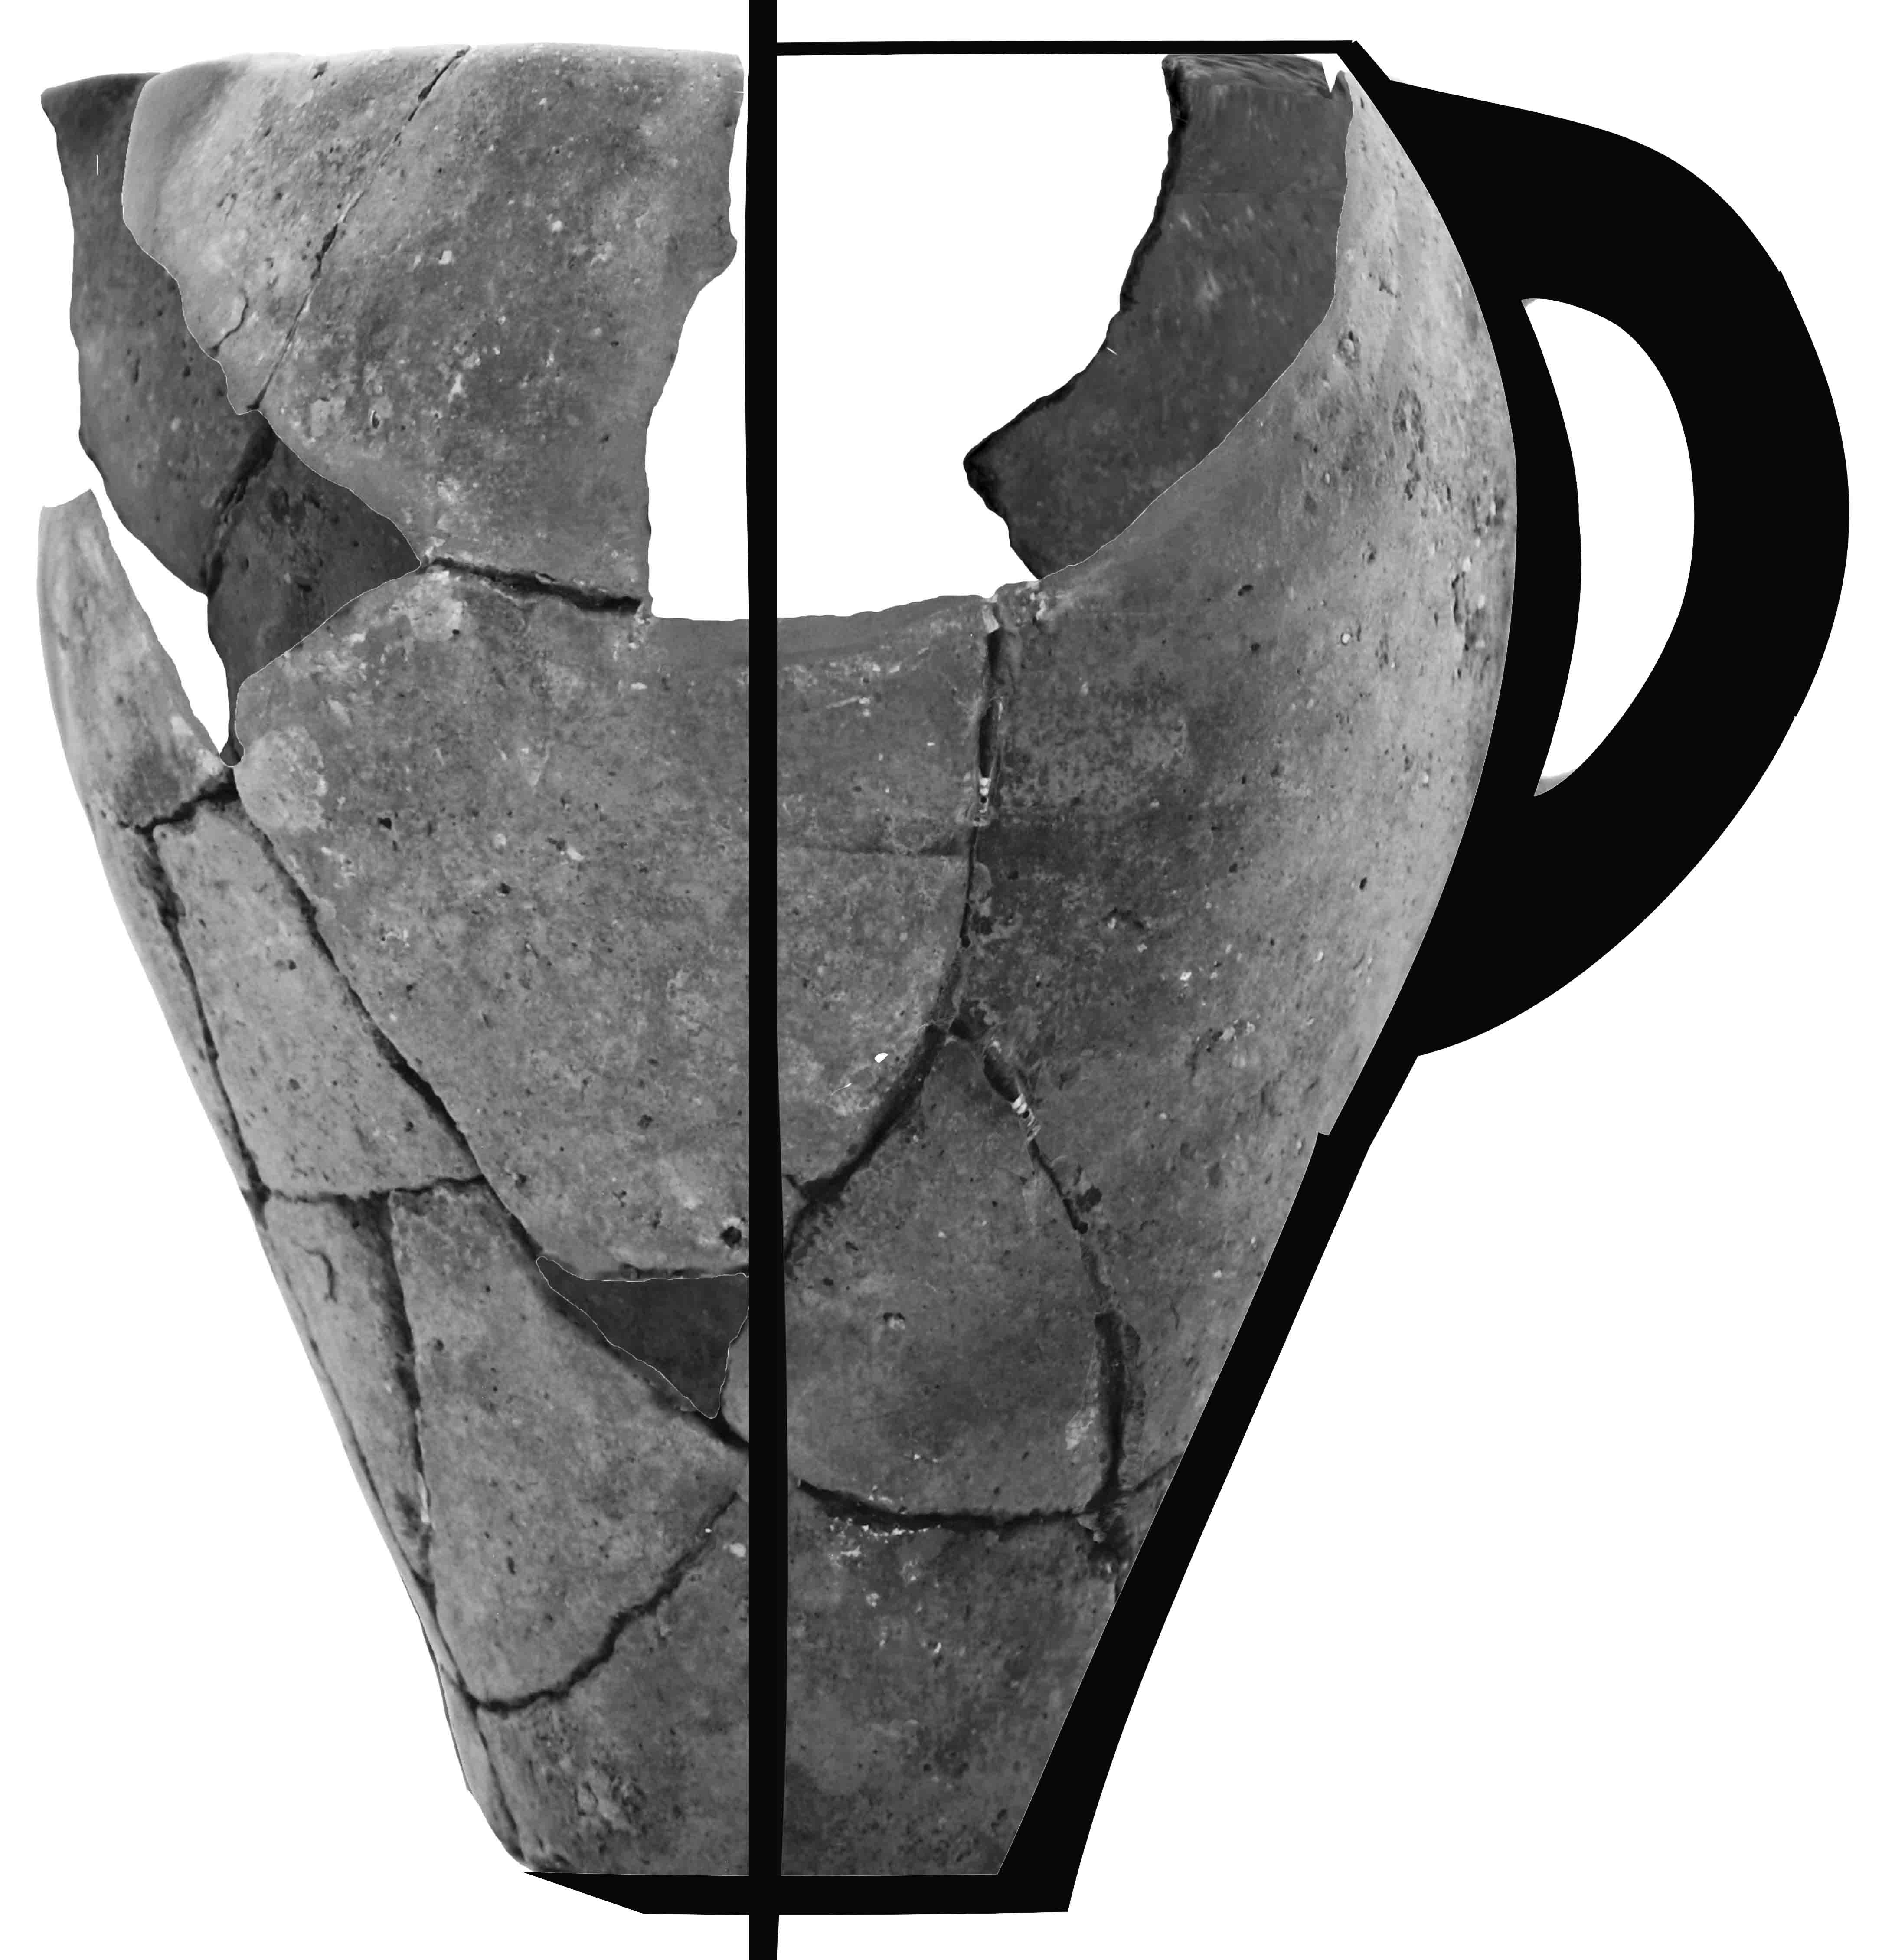 | |
| **1,07**  **±**0,05 | **1,61**  ±0,03 | **2,0**  **±**0,1 |
|  | | |
| **A** | **Β** | **Γ** | **Δ** | **Ε** | **Ζ** | **Η** | **Θ** | **Ι** | **Κ** |
| **1** | **D** (±0.3) cm | **5.3** | **4.4** |  | **2.9** | **4.8** | **4.6** | **7.6** | **4.3** |  | **2.6** |
| **L** (±0.1) cm | **1.1** | **0.9** | **0.8** | **1.0** | **1.1** | **0.9** | **9.0** | **1.2** |
| **Bxz** (±1)nT | **29** | **53** | **105** | **96** | **90** | **92** | **105** | **59** |
| **By** (±1)nT | **34** | **34** | **-5** | **-16** | **-17** | **-19** | **4** | **40** |
| **B**(±1)nT | **45** | **63** | **105** | **97** | **92** | **94** | **105** | **71** |
| **θΒο** | **40±1** | **57±1** | **-87±1** | **-81±1** | **-79±1** | **-78±1** | **88±1** | **56±1** |
| **2** | **D** (±0.3) cm | **7.8** | **9.7** |  | **5.4** |  |  | **4.5** |  | **1.9** | **3.7** |
| **L** (±0.1) cm | **1.4** | **1.3** | **1.5** | **1.5** | **1.4** | **1.5** |
| **Bxz** (±1)nT | **50** | **79** | **99** | **97** | **94** | **60** |
| **By** (±1)nT | **36** | **28** | **-14** | **-22** | **14** | **38** |
| **B**(±1)nT | **62** | **84** | **100** | **99** | **95** | **71** |
| **θΒο** | **54±1** | **70±1** | **-82±1** | **-77±1** | **82±1** | **58±1** |
| **3** | **D** (±0.3) cm | **8.6** |  | **4.1** | **3.1** | **5.1** | **3.0** | **12.3** | **4.1** | **4.6** | **8.9** |
| **L** (±0.1) cm | **1.4** | **1.2** | **1.4** | **1.3** | **1.3** | **1.4** | **1.5** | **1.4** | **1.3** |
| **Bxz** (±1)nT | **94** | **102** | **76** | **44** | **38** | **73** | **95** | **106** | **96** |
| **By** (±1)nT | **20** | **-13** | **-30** | **-40** | **-42** | **-31** | **-13** | **2** | **14** |
| **B**(±1)nT | **96±1** | **103±1** | **82±1** | **59±1** | **57±1** | **79±1** | **95±1** | **106±1** | **97±1** |
| **θΒο** | **78** | **-83** | **-68** | **-48** | **-42** | **-67** | **-82** | **89** | **82** |
| **4** | **D** (±0.3) cm | **4.1** | **5.6** | **5.0** | **2.4** | **2.0** | **3.8** | **8.7** | **2.7** | **8.3** | **15.7** |
| **L** (±0.1) cm | **1.4** | **1.3** | **1.3** | **1.5** | **1.3** | **1.3** | **1.3** | **1.4** | **1.4** | **1.3** |
| **Bxz** (±1)nT | **102** | **104** | **87** | **55** | **52** | **27** | **52** | **89** | **99** | **102** |
| **By** (±1)nT | **16** | **7** | **-20** | **-34** | **-35** | **-44** | **-33** | **-23** | **-1** | **12** |
| **B**(±1)nT | **103** | **104** | **89** | **65** | **63** | **52** | **62** | **92** | **99** | **103** |
| **θΒο** | **81±1** | **86±1** | **-77±1** | **-58±1** | **-56±1** | **-32±1** | **-58±1** | **-76±1** | **-89±1** | **83±1** |
| **5** | **D** (±0.3) cm | **9.8** | **10.7** | **4.5** | **7.4** | **8.4** | **2.3** | **3.2** | **6.8** | **4.9** | **18.8** |
| **L** (±0.1) cm | **1.3** | **1.2** | **1.1** | **1.2** | **1.2** | **1.1** | **1.1** | **1.2** | **1.2** | **1.3** |
| **Bxz** (±1)nT | **88** | **95** | **96** | **71** | **59** | **39** | **64** | **101** | **104** | **95** |
| **By** (±1)nT | **19** | **18** | **-13** | **-30** | **-38** | **-35** | **-32** | **-12** | **6** | **18** |
| **B**(±1)nT | **90** | **97** | **97** | **77** | **70** | **52** | **72** | **102** | **104** | **97** |
| **θΒο** | **78±1** | **79±1** | **-82±1** | **-67±1** | **-57±1** | **-48±1** | **-63±1** | **-83±1** | **87±1** | **79±1** |

**Table 9**. *Measurements D, L, and sensor readings of Bi (i=xz,y), with the x-sensor aligned along the common direction of Bxz, Μxz, on the body fragments of* ***vase 3****.*


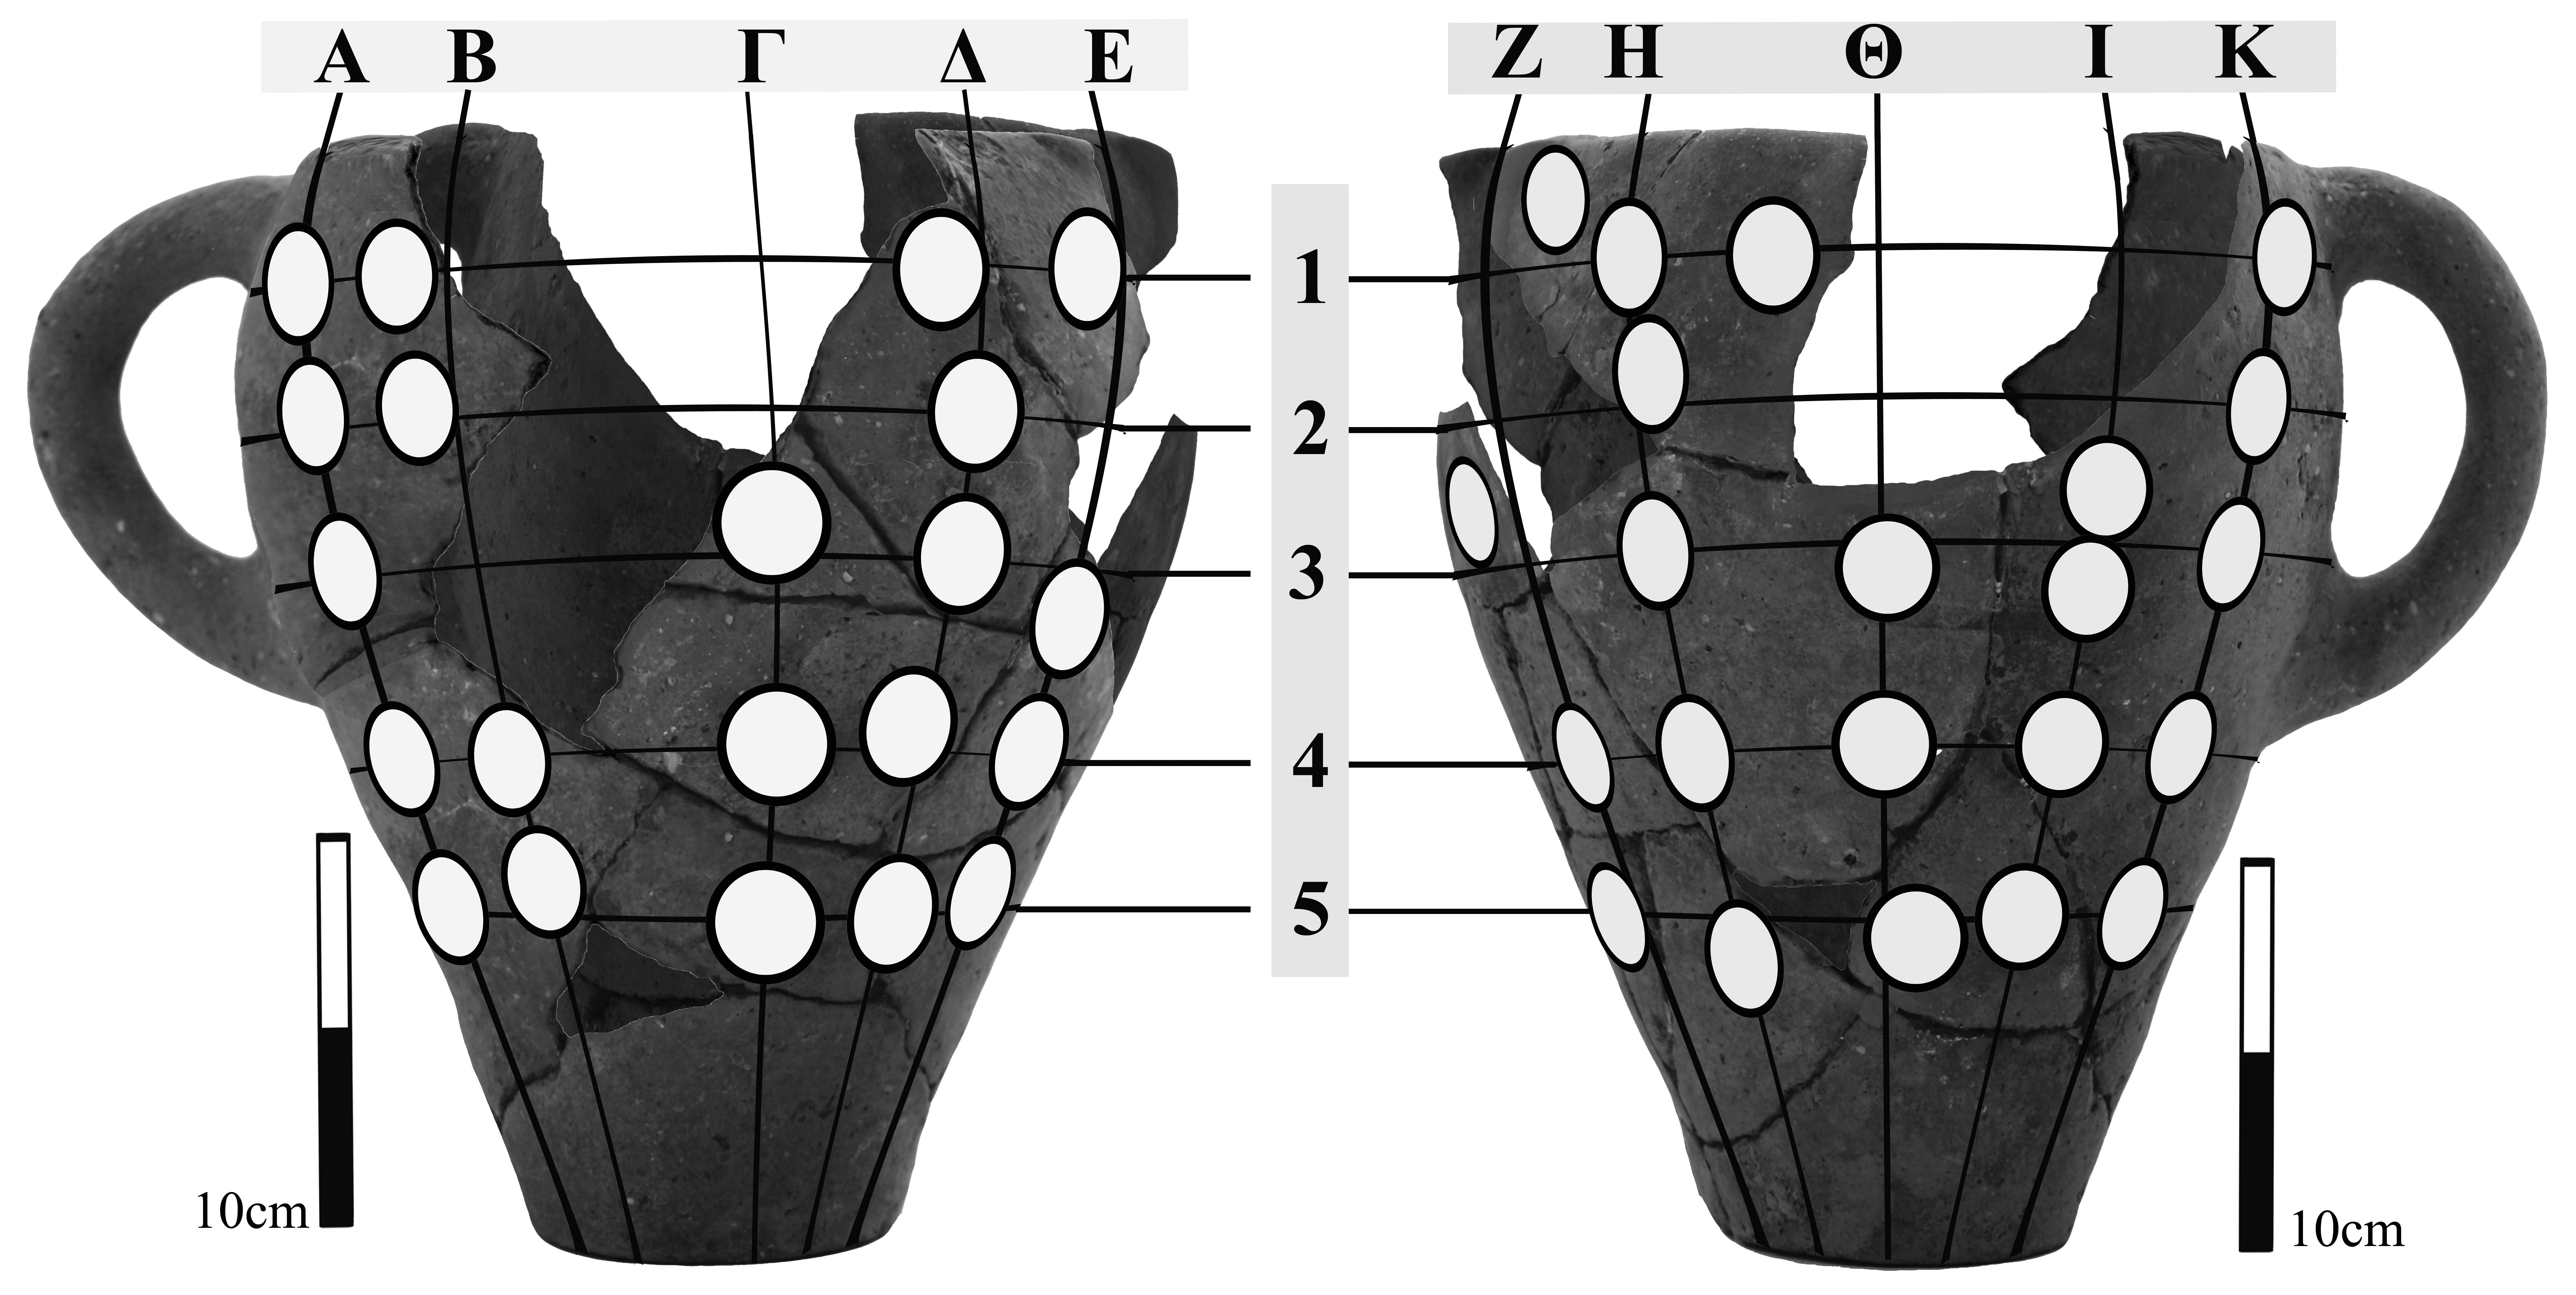


| **Vase 3** | |  | | | | | | | | | |
| --- | --- | --- | --- | --- | --- | --- | --- | --- | --- | --- | --- |
| 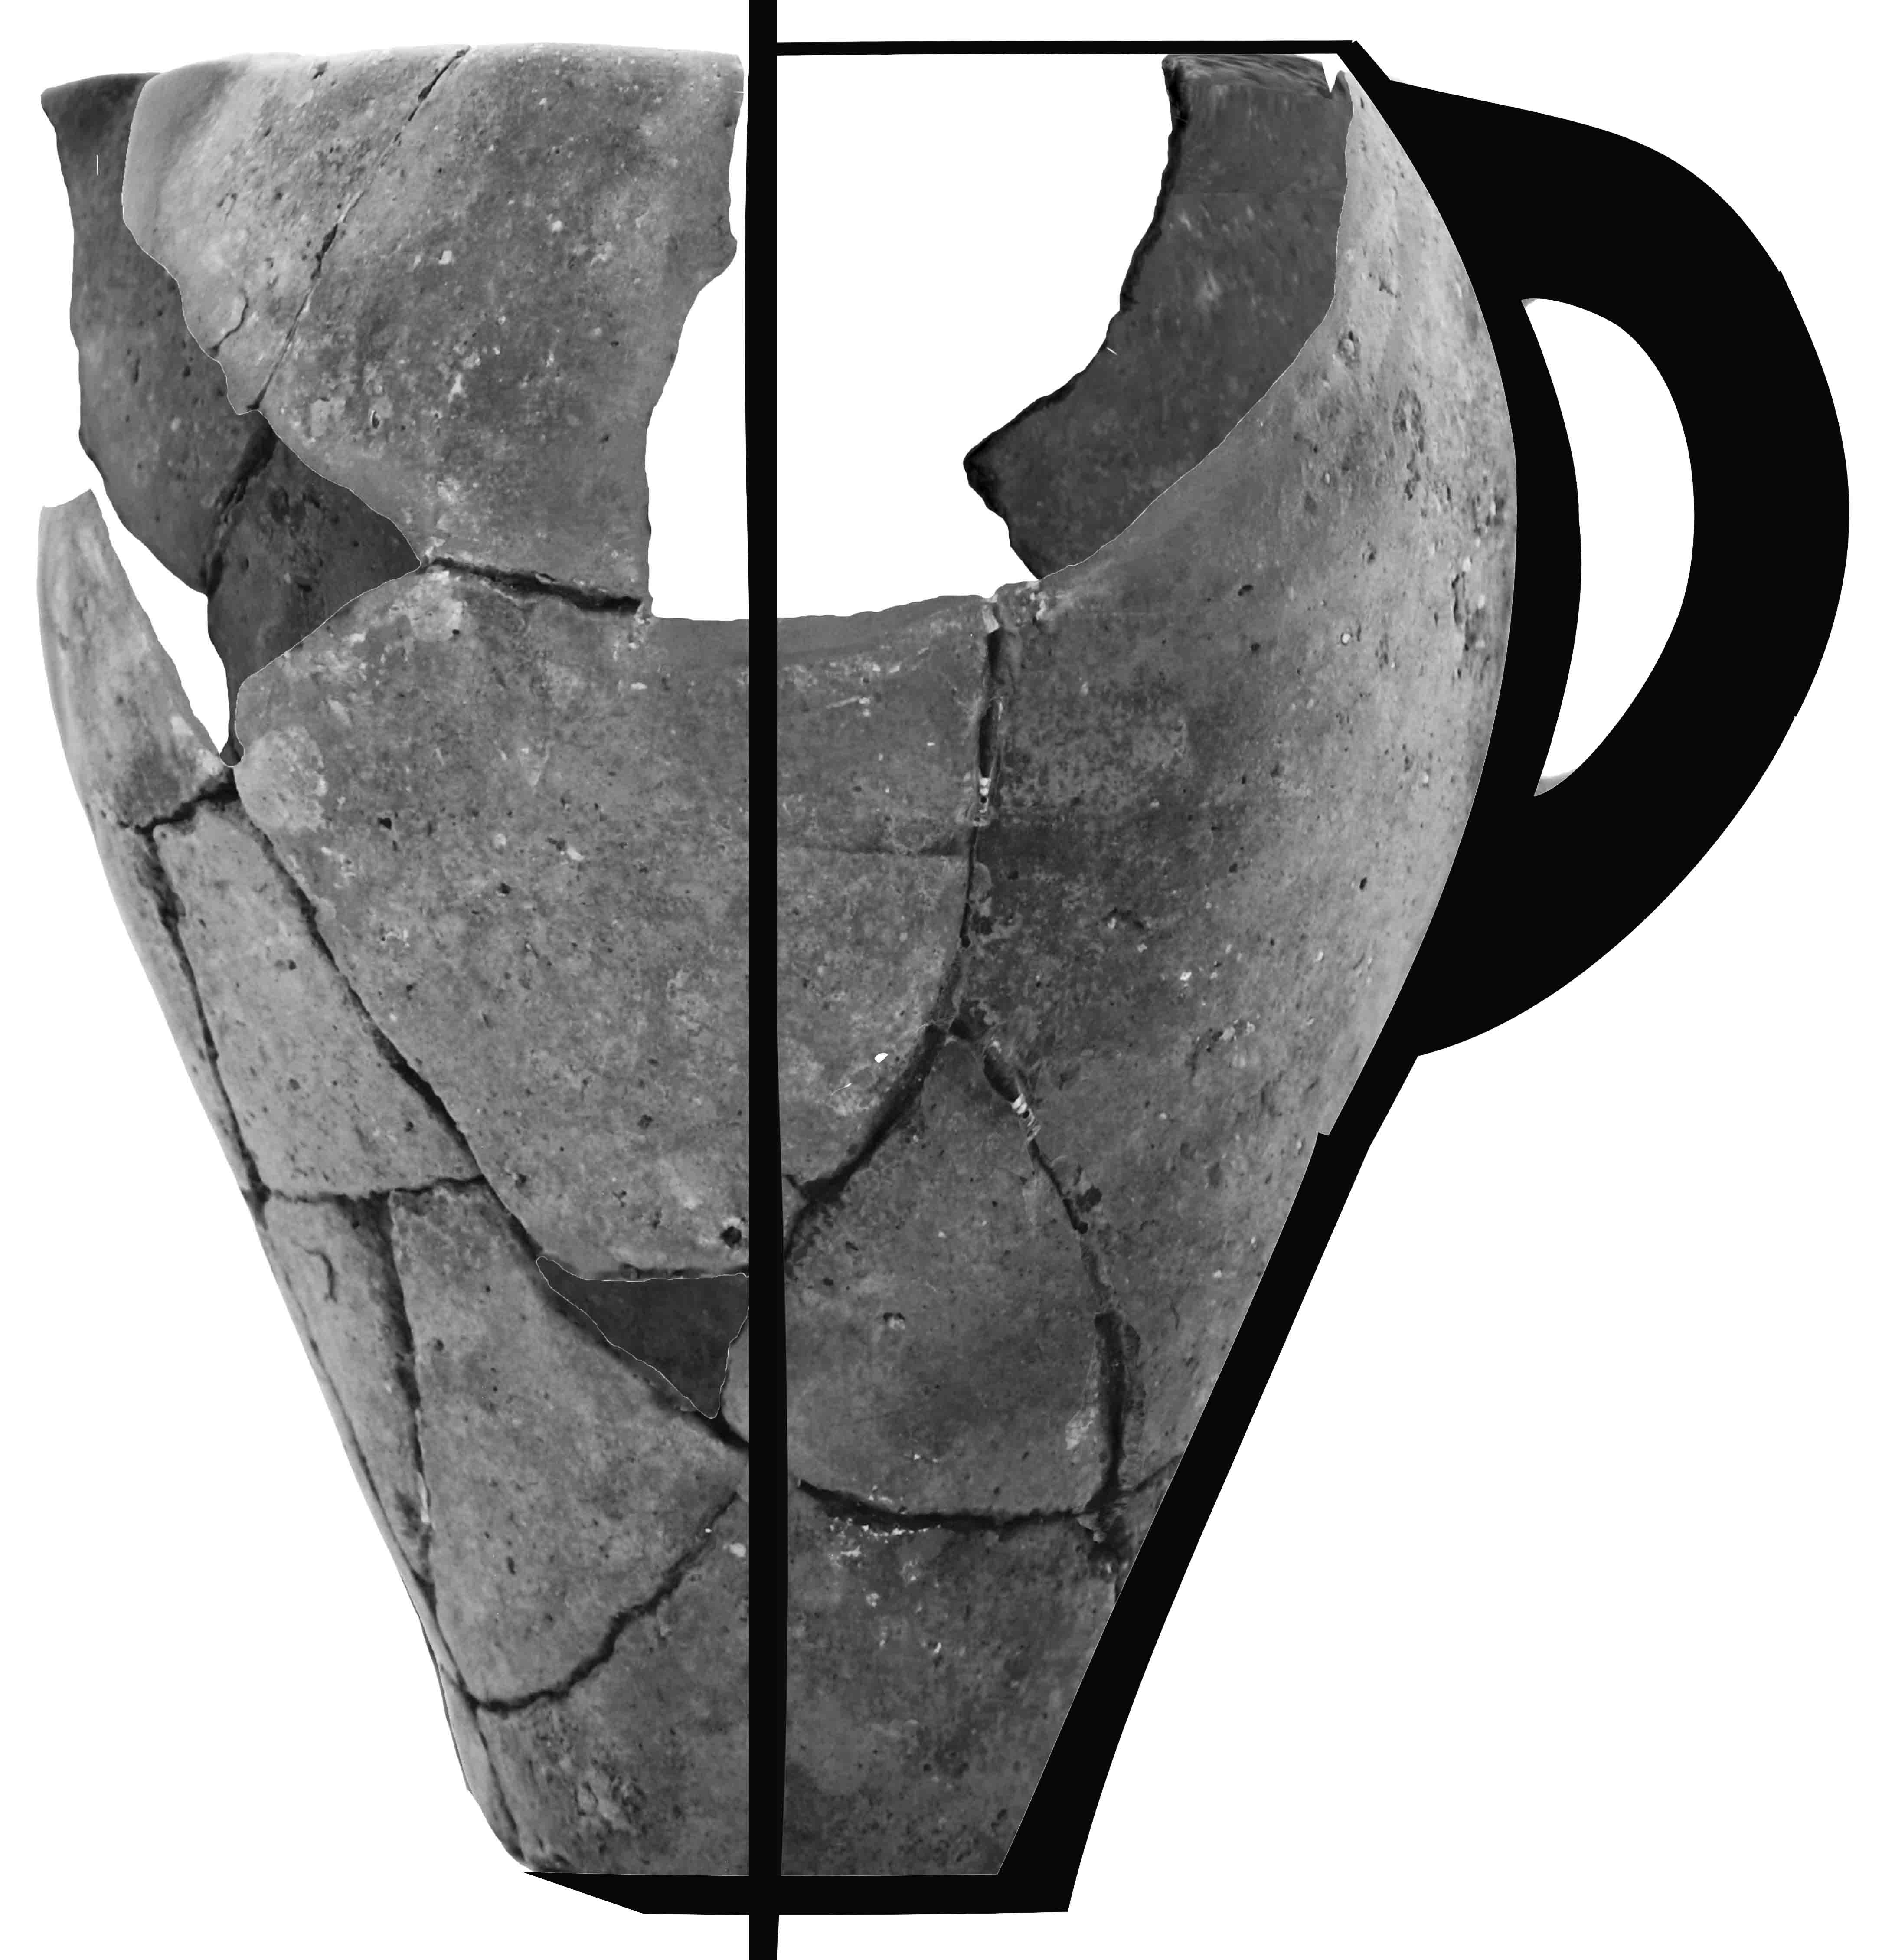 | |
| **A** | **Β** | **Γ** | **Δ** | **Ε** | **Ζ** | **Η** | **Θ** | **Ι** | **Κ** |
| **1** | **Βy** (±1nΤ) | **36** | **34** |  | **-6** | **-16** | **-17** | **-19** | **4** |  | **40** |
| **Bx**(±1nΤ) | **-22** | **-38** | **-60** | **-34** | **31** | **51** | **75** | **51** |
| **Bz**(±1nΤ) | **26** | **40** | **82** | **87** | **91** | **86** | **78** | **39** |
| **B**(±1nΤ) | **50** | **65** | **102** | **95** | **98** | **102** | **108** | **76** |
| **θΒο** | **43±**1 | **58±**1 | **-87±**1 | **-80±**1 | **-80±**1 | **-79±**1 | **88±**1 | **58±**1 |
| **φΒο** | **130±**2 | **134±**1 | **126±**1 | **111±**1 | **71±**1 | **59±**1 | **46±**1 | **37±**1 |
| **2** | **Βy** (±1nΤ) | **36** | **28** |  | **-15** |  |  | **-22** |  | **15** | **37** |
| **Bx**(±1nΤ) | **-24** | **-51** | **-57** | **55** | **73** | **37** |
| **Bz**(±1nΤ) | **49** | **51** | **71** | **84** | **67** | **46** |
| **B**(±1nΤ) | **65** | **77** | **92** | **103** | **100** | **70** |
| **θΒο** | **57±**1 | **69±**1 | **-81±**1 | **-78±**1 | **81±**1 | **58±**1 |
| **φΒο** | **116±**1 | **135±**1 | **129±**1 | **57±**1 | **43±**1 | **51±**1 |
| **3** | **Βy** (±1nΤ) | **19** |  | **-14** | **-31** | **-39** | **-41** | **-32** | **-14** | **2** | **14** |
| **Bx**(±1nΤ) | **-36** | **-70** | **-58** | **-31** | **18** | **48** | **74** | **65** | **46** |
| **Bz**(±1nΤ) | **84** | **64** | **43** | **30** | **33** | **49** | **65** | **74** | **94** |
| **B**(±1nΤ) | **93** | **96** | **79** | **58** | **56** | **76** | **99** | **99** | **106** |
| **θΒο** | **78±**1 | **-82±**1 | **-67±**`1 | **-48±**1 | **-43±**1 | **-65±**1 | **-82±**1 | **89±**1 | **82±**1 |
| **φΒο** | **113±**1 | **138±**1 | **143±**1 | **136±**1 | **61±**2 | **46±**1 | **41±**1 | **49±**1 | **64±**1 |
| **4** | **Βy** (±1nΤ) | **16** | **9** | **-19** | **-35** | **-35** | **-43** | **-34** | **-22** | **-1** | **12** |
| **Bx**(±1nΤ) | **-25** | **-55** | **-72** | **-46** | **-41** | **16** | **48** | **73** | **63** | **34** |
| **Bz**(±1nΤ) | **97** | **83** | **58** | **36** | **32** | **22** | **30** | **55** | **84** | **88** |
| **B**(±1nΤ) | **101** | **100** | **94** | **68** | **63** | **51** | **66** | **94** | **105** | **95** |
| **θΒο** | **81±**1 | **85±**1 | **-78±**1 | **-59±**1 | **-56±**1 | **-32±**1 | **-59±**1 | **-76±**1 | **-89±**1 | **83±**1 |
| **φΒο** | **104±**1 | **124±**1 | **141±**1 | **142±**1 | **142±**1 | **54±**2 | **32±**1 | **37±**1 | **53±**1 | **69±**1 |
| **5** | **Βy** (±1nΤ) | **19** | **17** | **-15** | **-30** | **-37** | **-36** | **-33** | **-13** | **-5** | **17** |
| **Bx**(±1nΤ) | **-21** | **-52** | **-72** | **-49** | **-36** | **21** | **44** | **70** | **71** | **49** |
| **Bz**(±1nΤ) | **86** | **89** | **62** | **42** | **42** | **28** | **43** | **62** | **82** | **85** |
| **B**(±1nΤ) | **91** | **104** | **96** | **71** | **67** | **50** | **70** | **94** | **109** | **100** |
| **θΒο** | **78±**1 | **81±**1 | **-81±**1 | **-65±**1 | **-56±**1 | **-44±**1 | **-62**1 | **-82±**1 | **87±**1 | **80±**1 |
| **φΒο** | **104±**1 | **120±**1 | **139±**1 | **139±**1 | **131±**1 | **53±**2 | **44±1** | **42±**1 | **49±**1 | **60±**1 |

**Table 10.** *Indicative sensor readings with the x-sensor oriented in the grooves’ direction on the body fragments of* ***vase 3.***


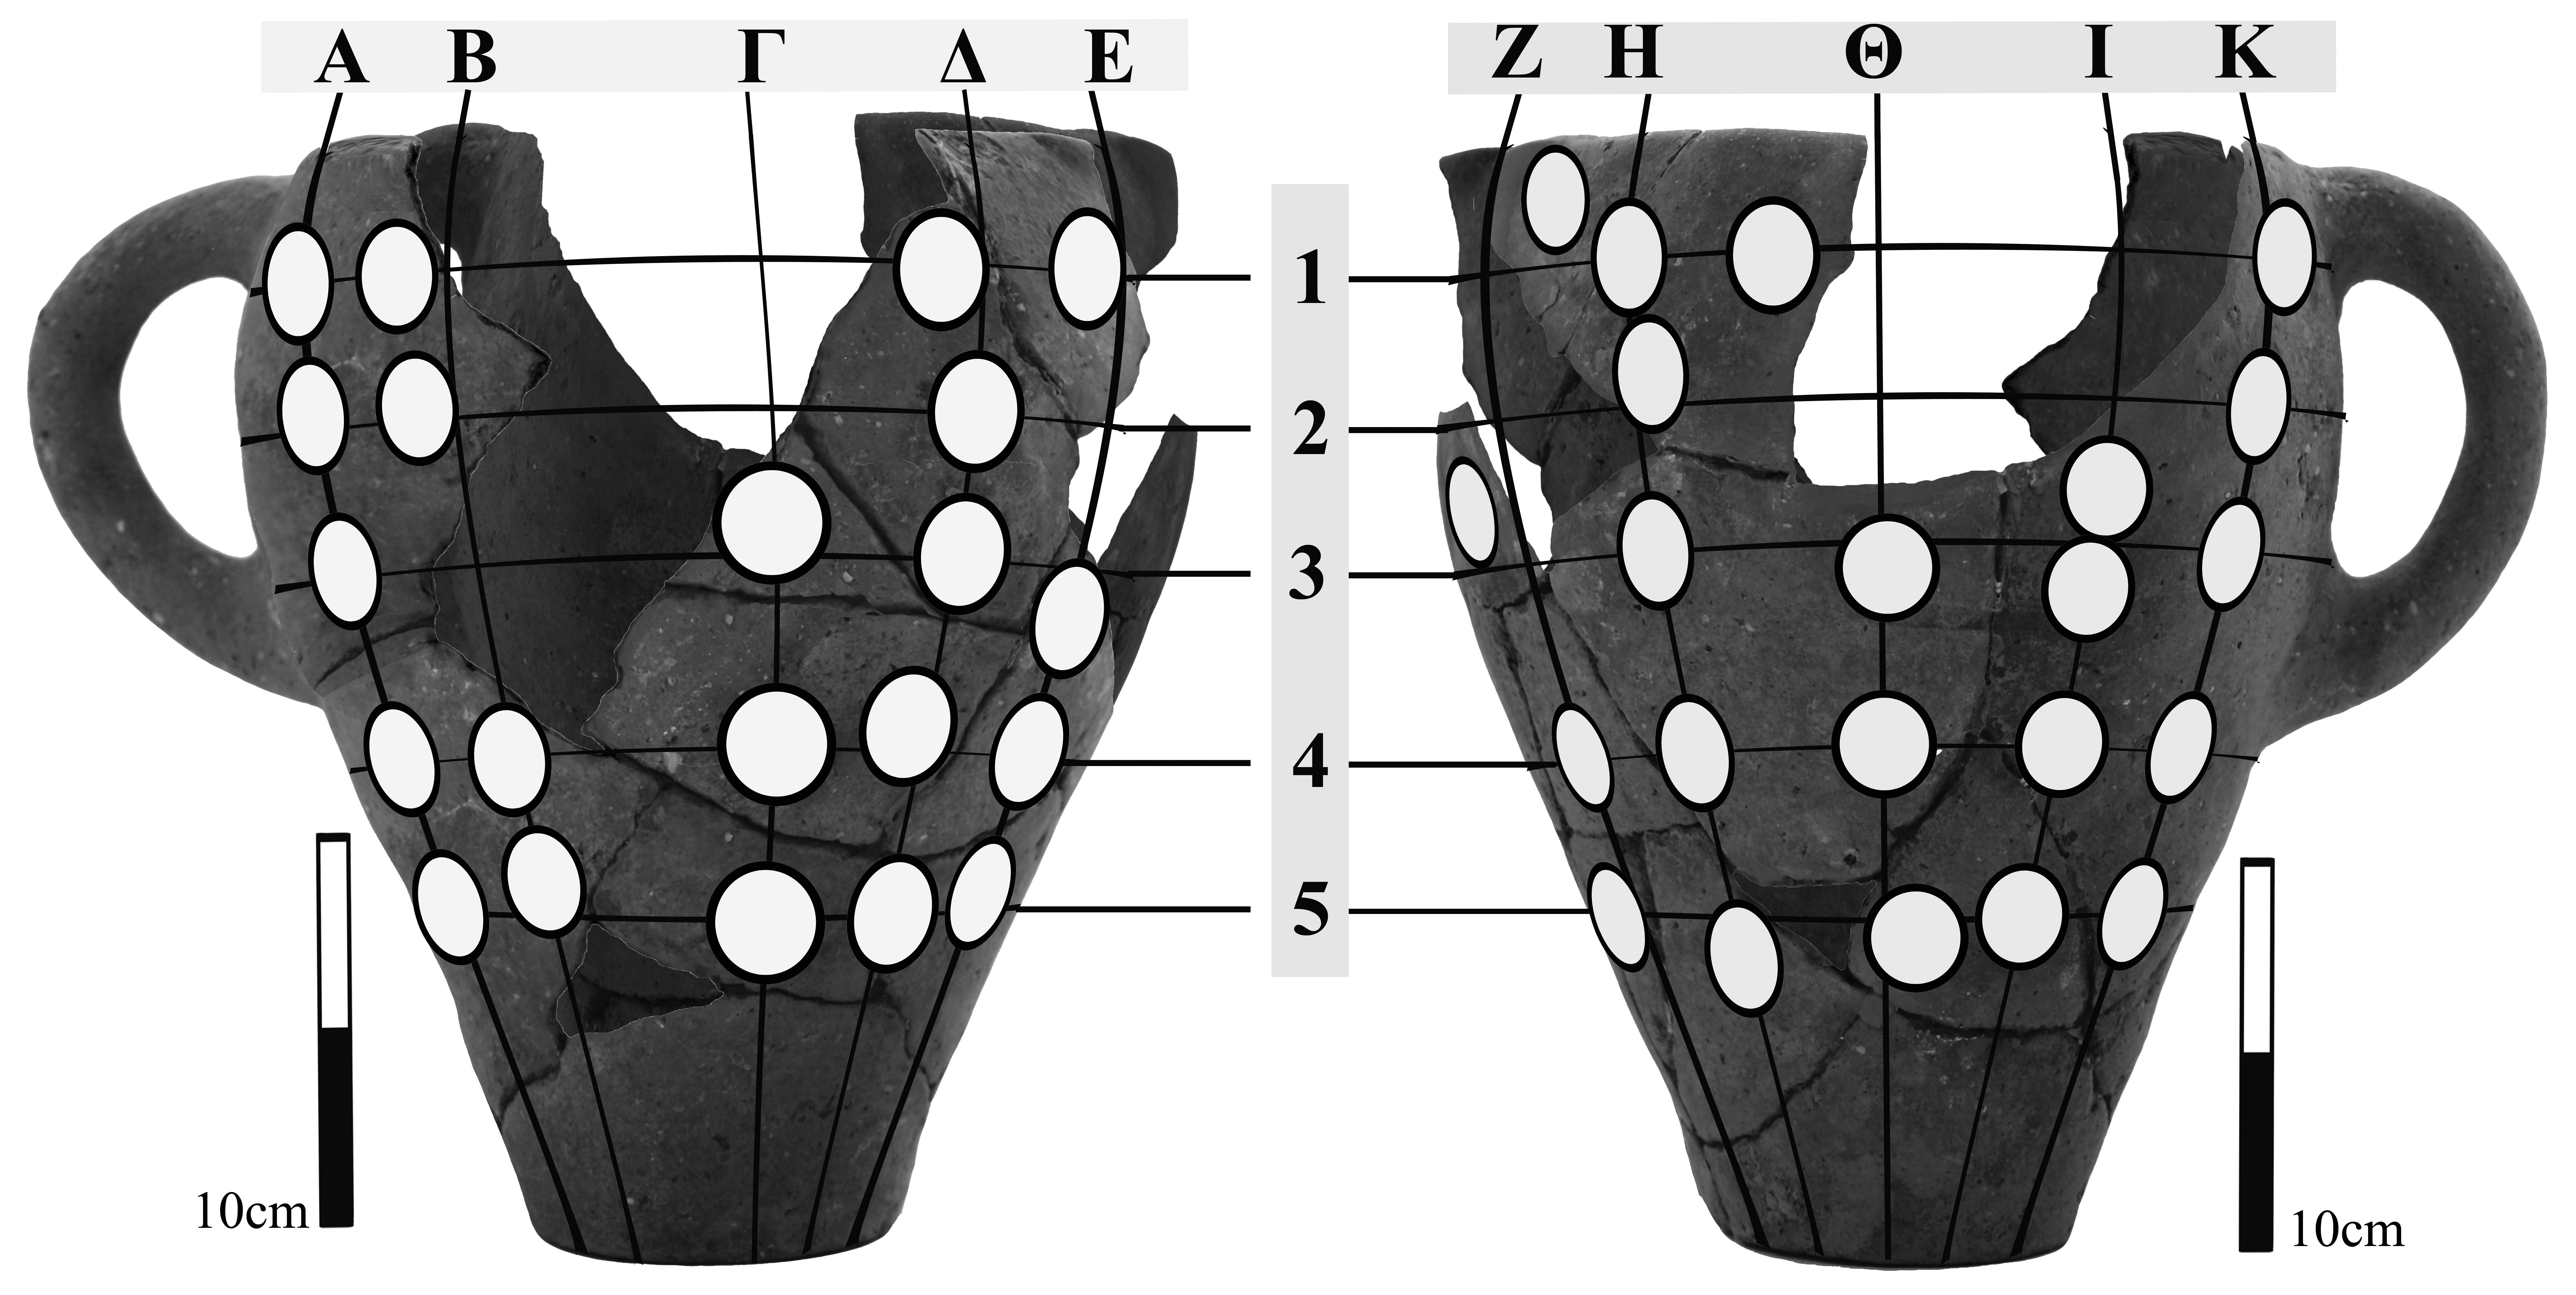


| **Vase 4** | |
| --- | --- |
| 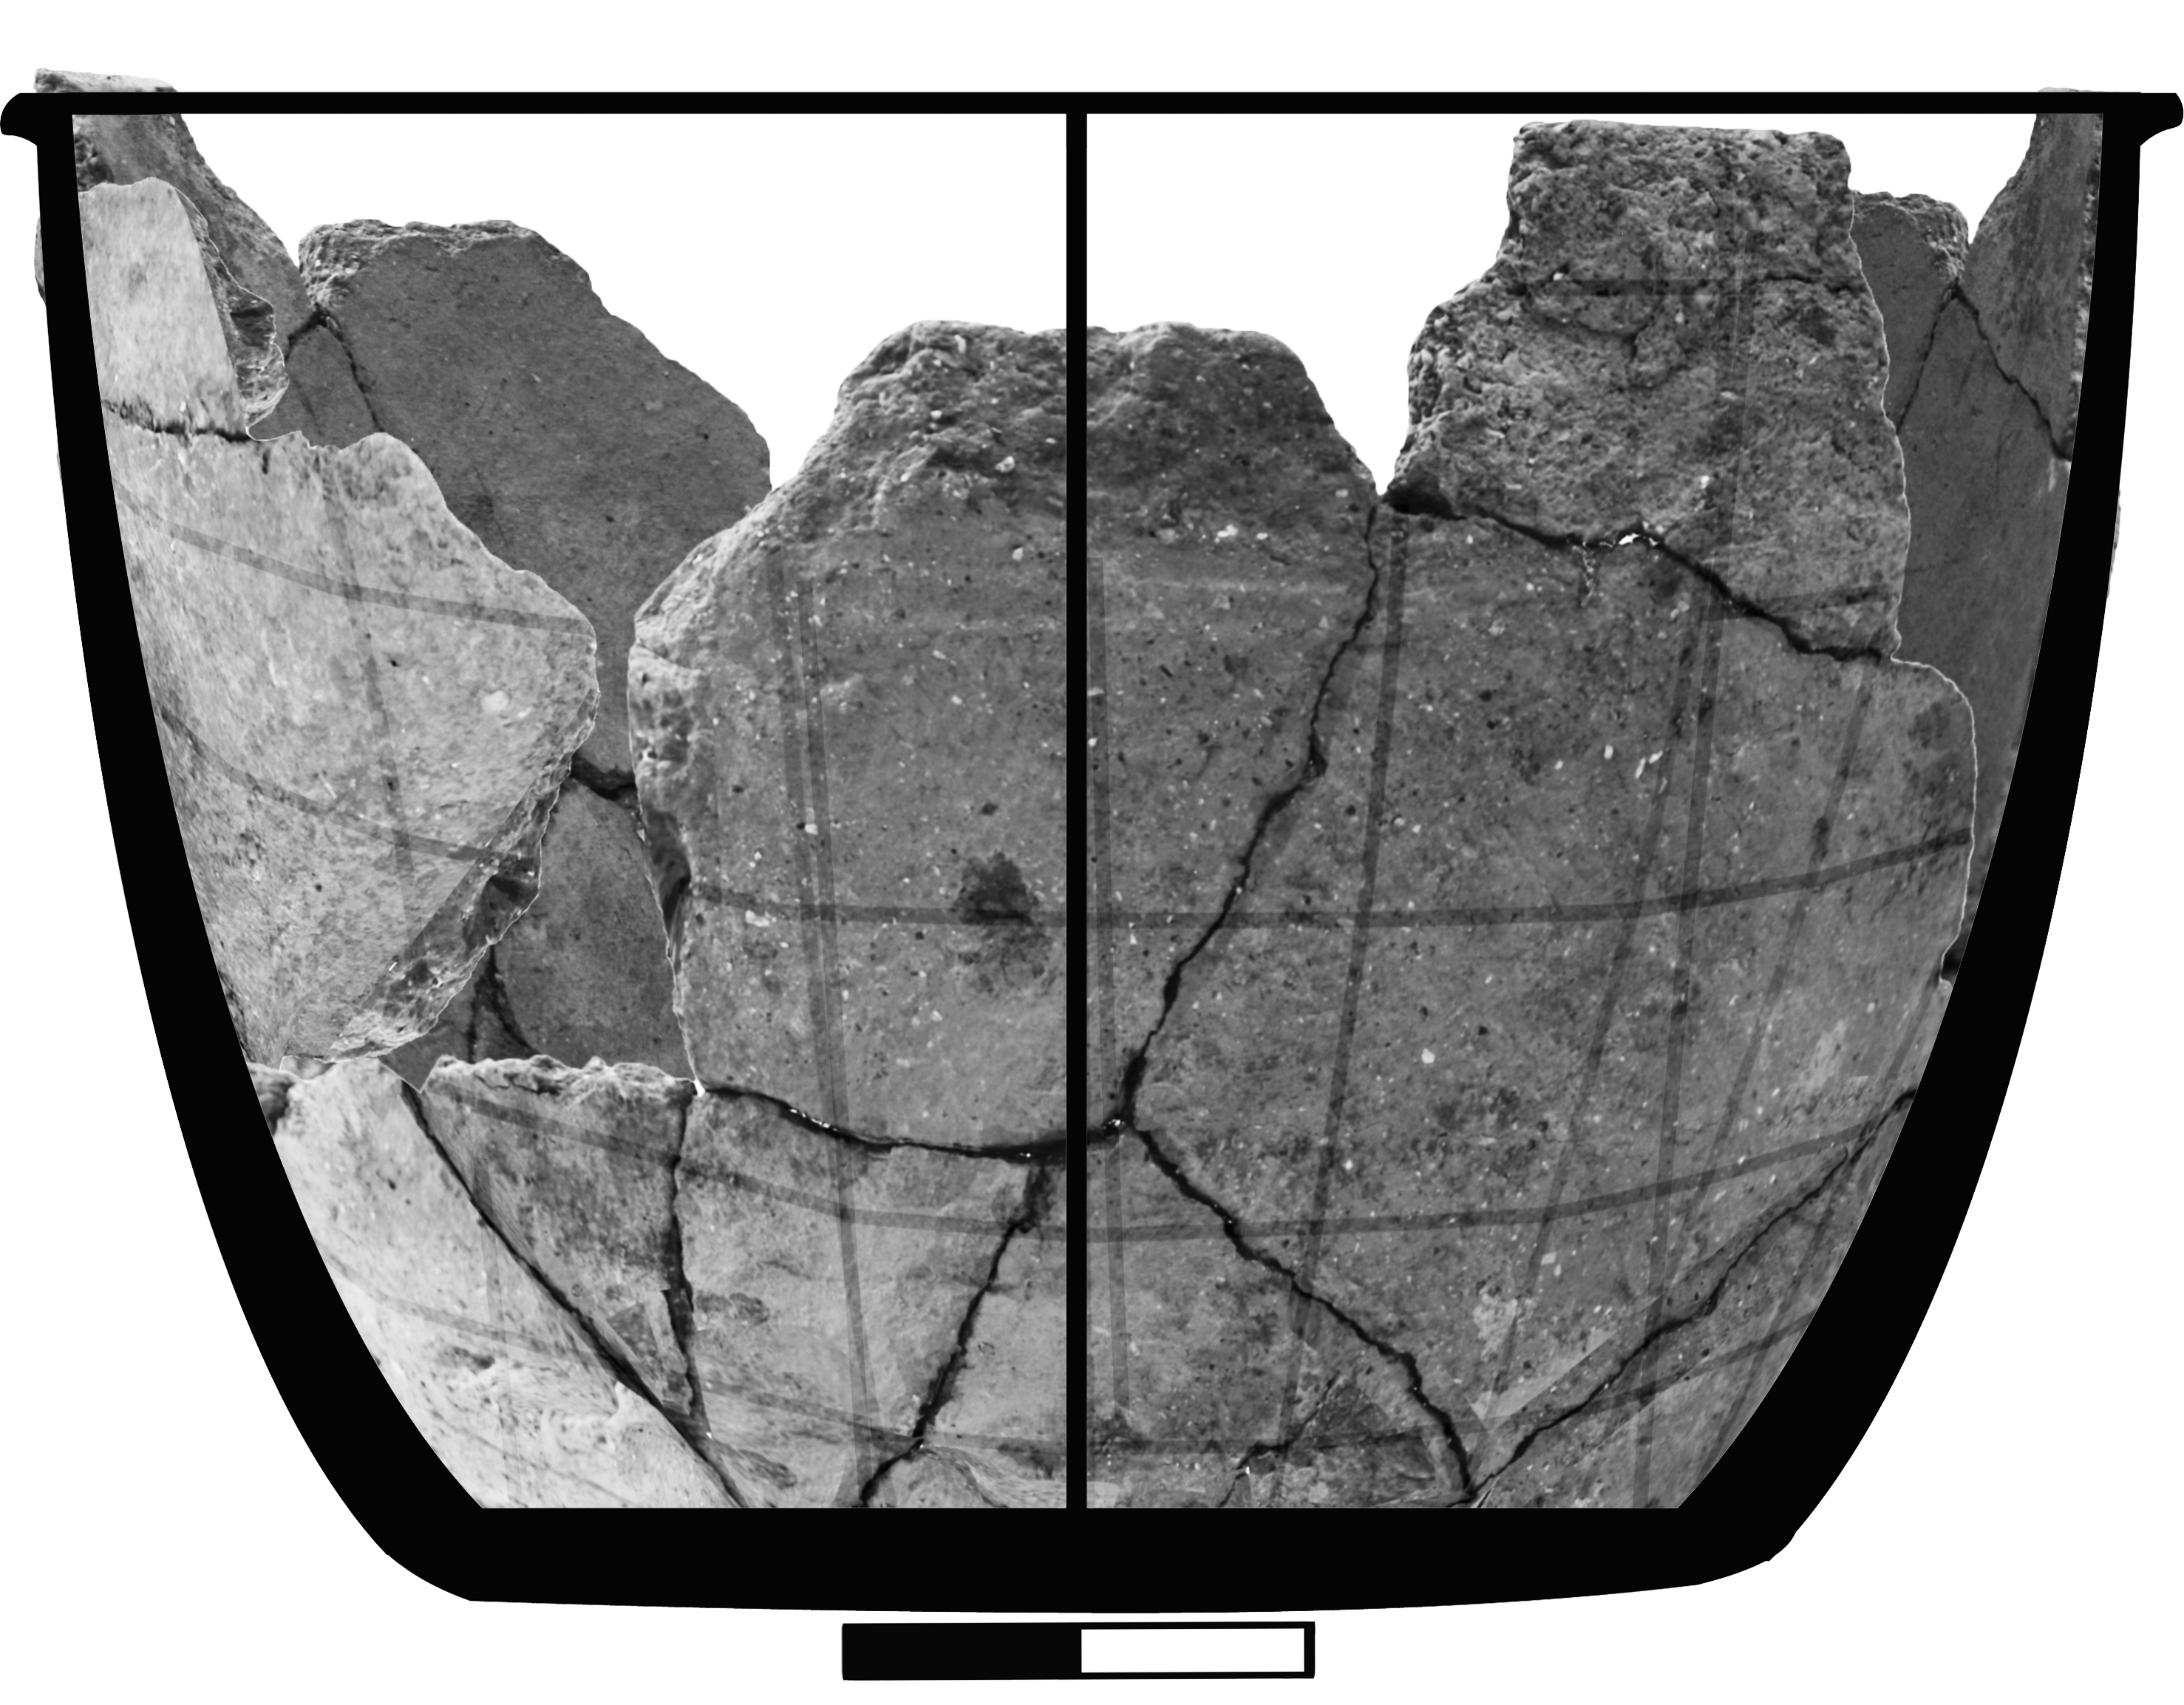 | |
|
|  | | | **αy˪**(cm) | | | | **αx,z//**(cm) | | | **λ** | | |
| **0.67±**0,03 | | | | **1.15±**0,02 | | | **1.97±**0,01 | | |
|  | | | |  | | | | | | | | |
| **A** | **Β** | **Γ** | | | **Δ** | **Ε** | | **Ζ** | **Η** | | **Θ** | **Ι** |
| **1** | **D** (±0.3) cm |  |  | **1.7** | | | **1.6** |  | | **4,2** |  | | **5,7** |  |
| **L** (±0.1) cm | **0.9** | | | **1.2** | **1,1** | **0,9** |
| **Bxz** (±1)nT | **37** | | | **35** | **40** | **54** |
| **By** (±1)nT | **16** | | | **15** | **17** | **5** |
| **B**(±1)nT | **40** | | | **38** | **44** | **54** |
| **θΒο** | **66±1** | | | **66±2** | **67±1** | **85±1** |
| **2** | **D** (±0.3) cm |  | **4.2** | **6.7** | | | **5.3** | **4.1** | | **8.8** | **2.4** | | **2.7** | **3.5** |
| **L** (±0.1) cm | **1.3** | **1.3** | | | **1.3** | **1.2** | | **1.3** | **1.3** | | **1.3** | **1.5** |
| **Bxz** (±1)nT | **47** | **43** | | | **43** | **43** | | **46** | **43** | | **48** | **55** |
| **By** (±1)nT | **15** | **14** | | | **18** | **18** | | **12** | **10** | | **9** | **3** |
| **B**(±1)nT | **49** | **45** | | | **47** | **47** | | **48** | **44** | | **49** | **55** |
| **θΒο** | **72±1** | **72±1** | | | **67±1** | **67±1** | | **75±1** | **77±1** | | **79±1** | **87±1** |
| **3** | **D** (±0.3) cm | **1.9** | **10,6** | **2.0** | | | **9.1** | **9.9** | | **13.9** | **4.4** | | **9.6** | **2.8** |
| **L** (±0.1) cm | **1.8** | **1.7** | **1.8** | | | **1.8** | **1.8** | | **1.7** | **1.7** | | **1.6** | **1.7** |
| **Bxz** (±1)nT | **53** | **52** | **47** | | | **47** | **47** | | **50** | **53** | | **55** | **49** |
| **By** (±1)nT | **5** | **12** | **13** | | | **12** | **14** | | **10** | **7** | | **2** | **-3** |
| **B**(±1)nT | **53** | **53** | **49** | | | **49** | **49** | | **51** | **53** | | **55** | **49** |
| **θΒο** | **85±1** | **77±1** | **74±1** | | | **75±1** | **73±1** | | **79±1** | **82±1** | | **88±1** | **-86±1** |
| **4** | **D** (±0.3) cm |  |  | **1.7** | | | **2.8** | **3.0** | | **2.3** | **7.5** | | **3>8** | **2.0** |
| **L** (±0.1) cm | **2.1** | | | **2.1** | **2.0** | | **2.1** | **2.1** | | **2.0** | **2.0** |
| **Bxz** (±1)nT | **50** | | | **45** | **49** | | **53** | **55** | | **55** | **53** |
| **By** (±1)nT | **9** | | | **9** | **10** | | **5** | **4** | | **-2** | **-5** |
| **B**(±1)nT | **51** | | | **46** | **50** | | **53** | **55** | | **55** | **53** |
| **θΒο** | **80±1** | | | **79±1** | **78±1** | | **85±1** | **86±1** | | **-88±1** | **-85±1** |
| **5** | **D** (±0.3) cm |  |  | **4.8** | | | **2.6** | **6.6** | | **5.5** | **2.5** | | **2.3** | **4.4** |
| **L** (±0.1) cm | **2.2** | | | **2.3** | **2.2** | | **2.1** | **2.3** | | **2.1** | **2.2** |
| **Bxz** (±1)nT | **53** | | | **54** | **53** | | **55** | **54** | | **48** | **51** |
| **By** (±1)nT | **6** | | | **7** | **6** | | **3** | **-1** | | **-6** | **-9** |
| **B**(±1)nT | **53** | | | **54** | **53** | | **55** | **54** | | **48** | **52** |
| **θΒο** | **83±1** | | | **83±1** | **83±1** | | **87±1** | **-89±1** | | **-83±1** | **-80±1** |

**Table 11**. *Measurements D, L, and sensor readings of Bi (i=xz,y), with the x-sensor aligned along the common direction of Bxz, Μxz, on the body fragments of* ***vase 4****.*


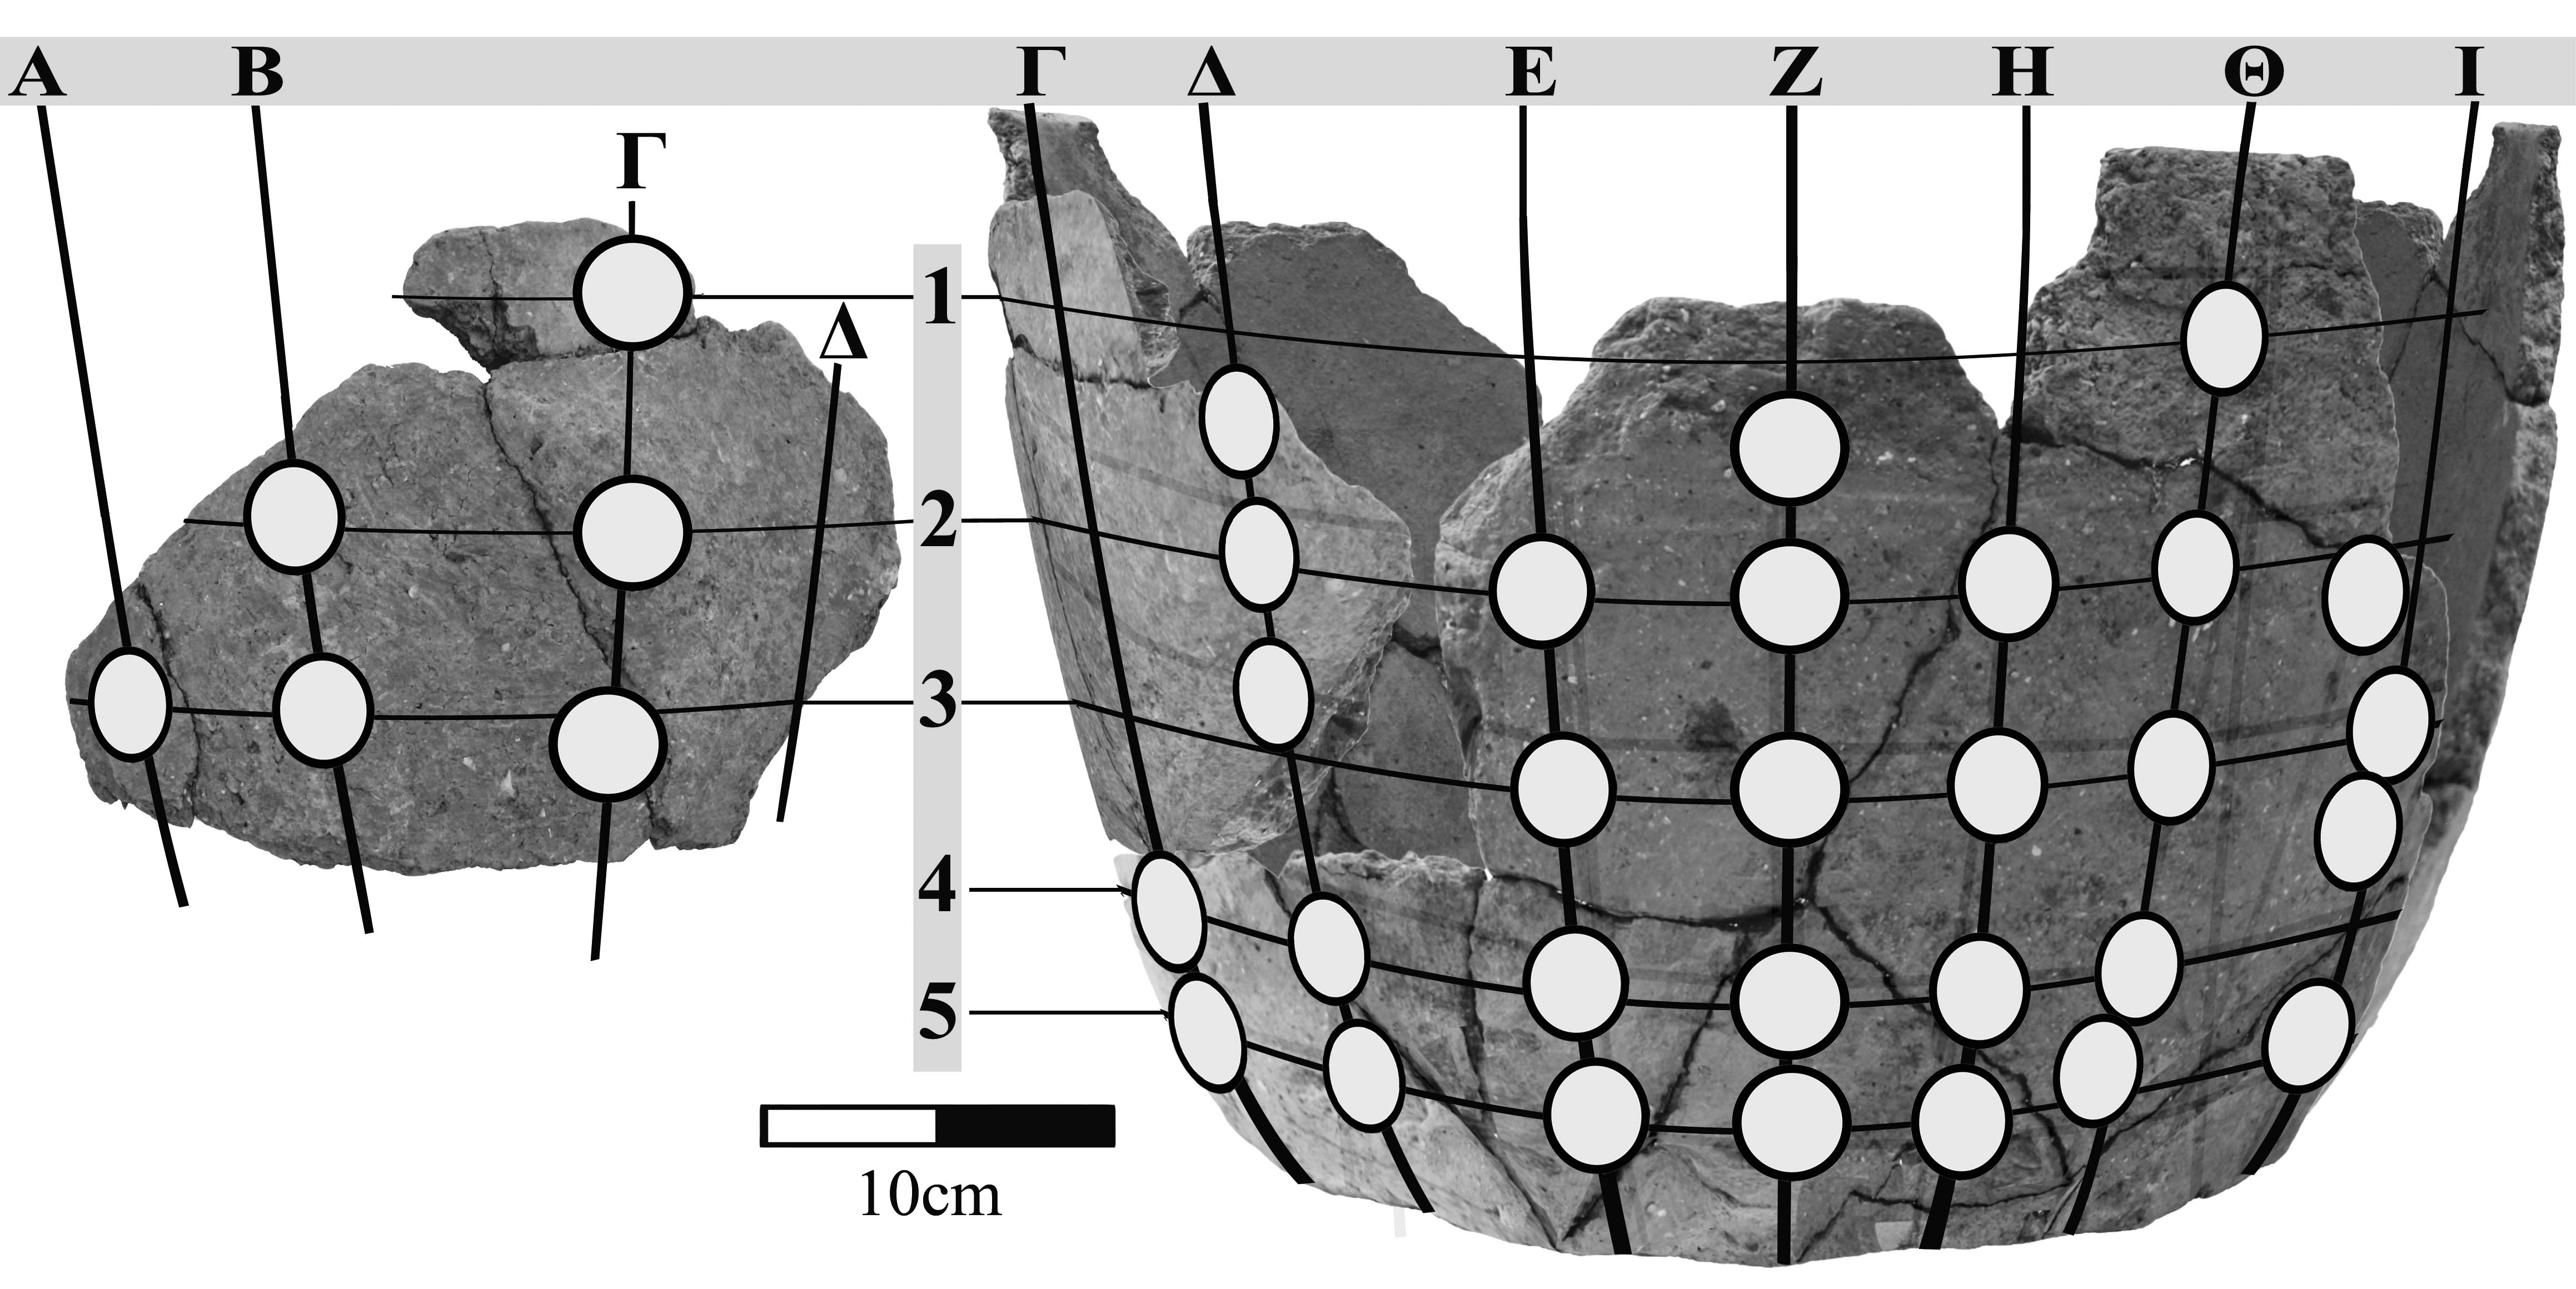


| **Vase 4** | |  | | | | | | | | |
| --- | --- | --- | --- | --- | --- | --- | --- | --- | --- | --- |
| 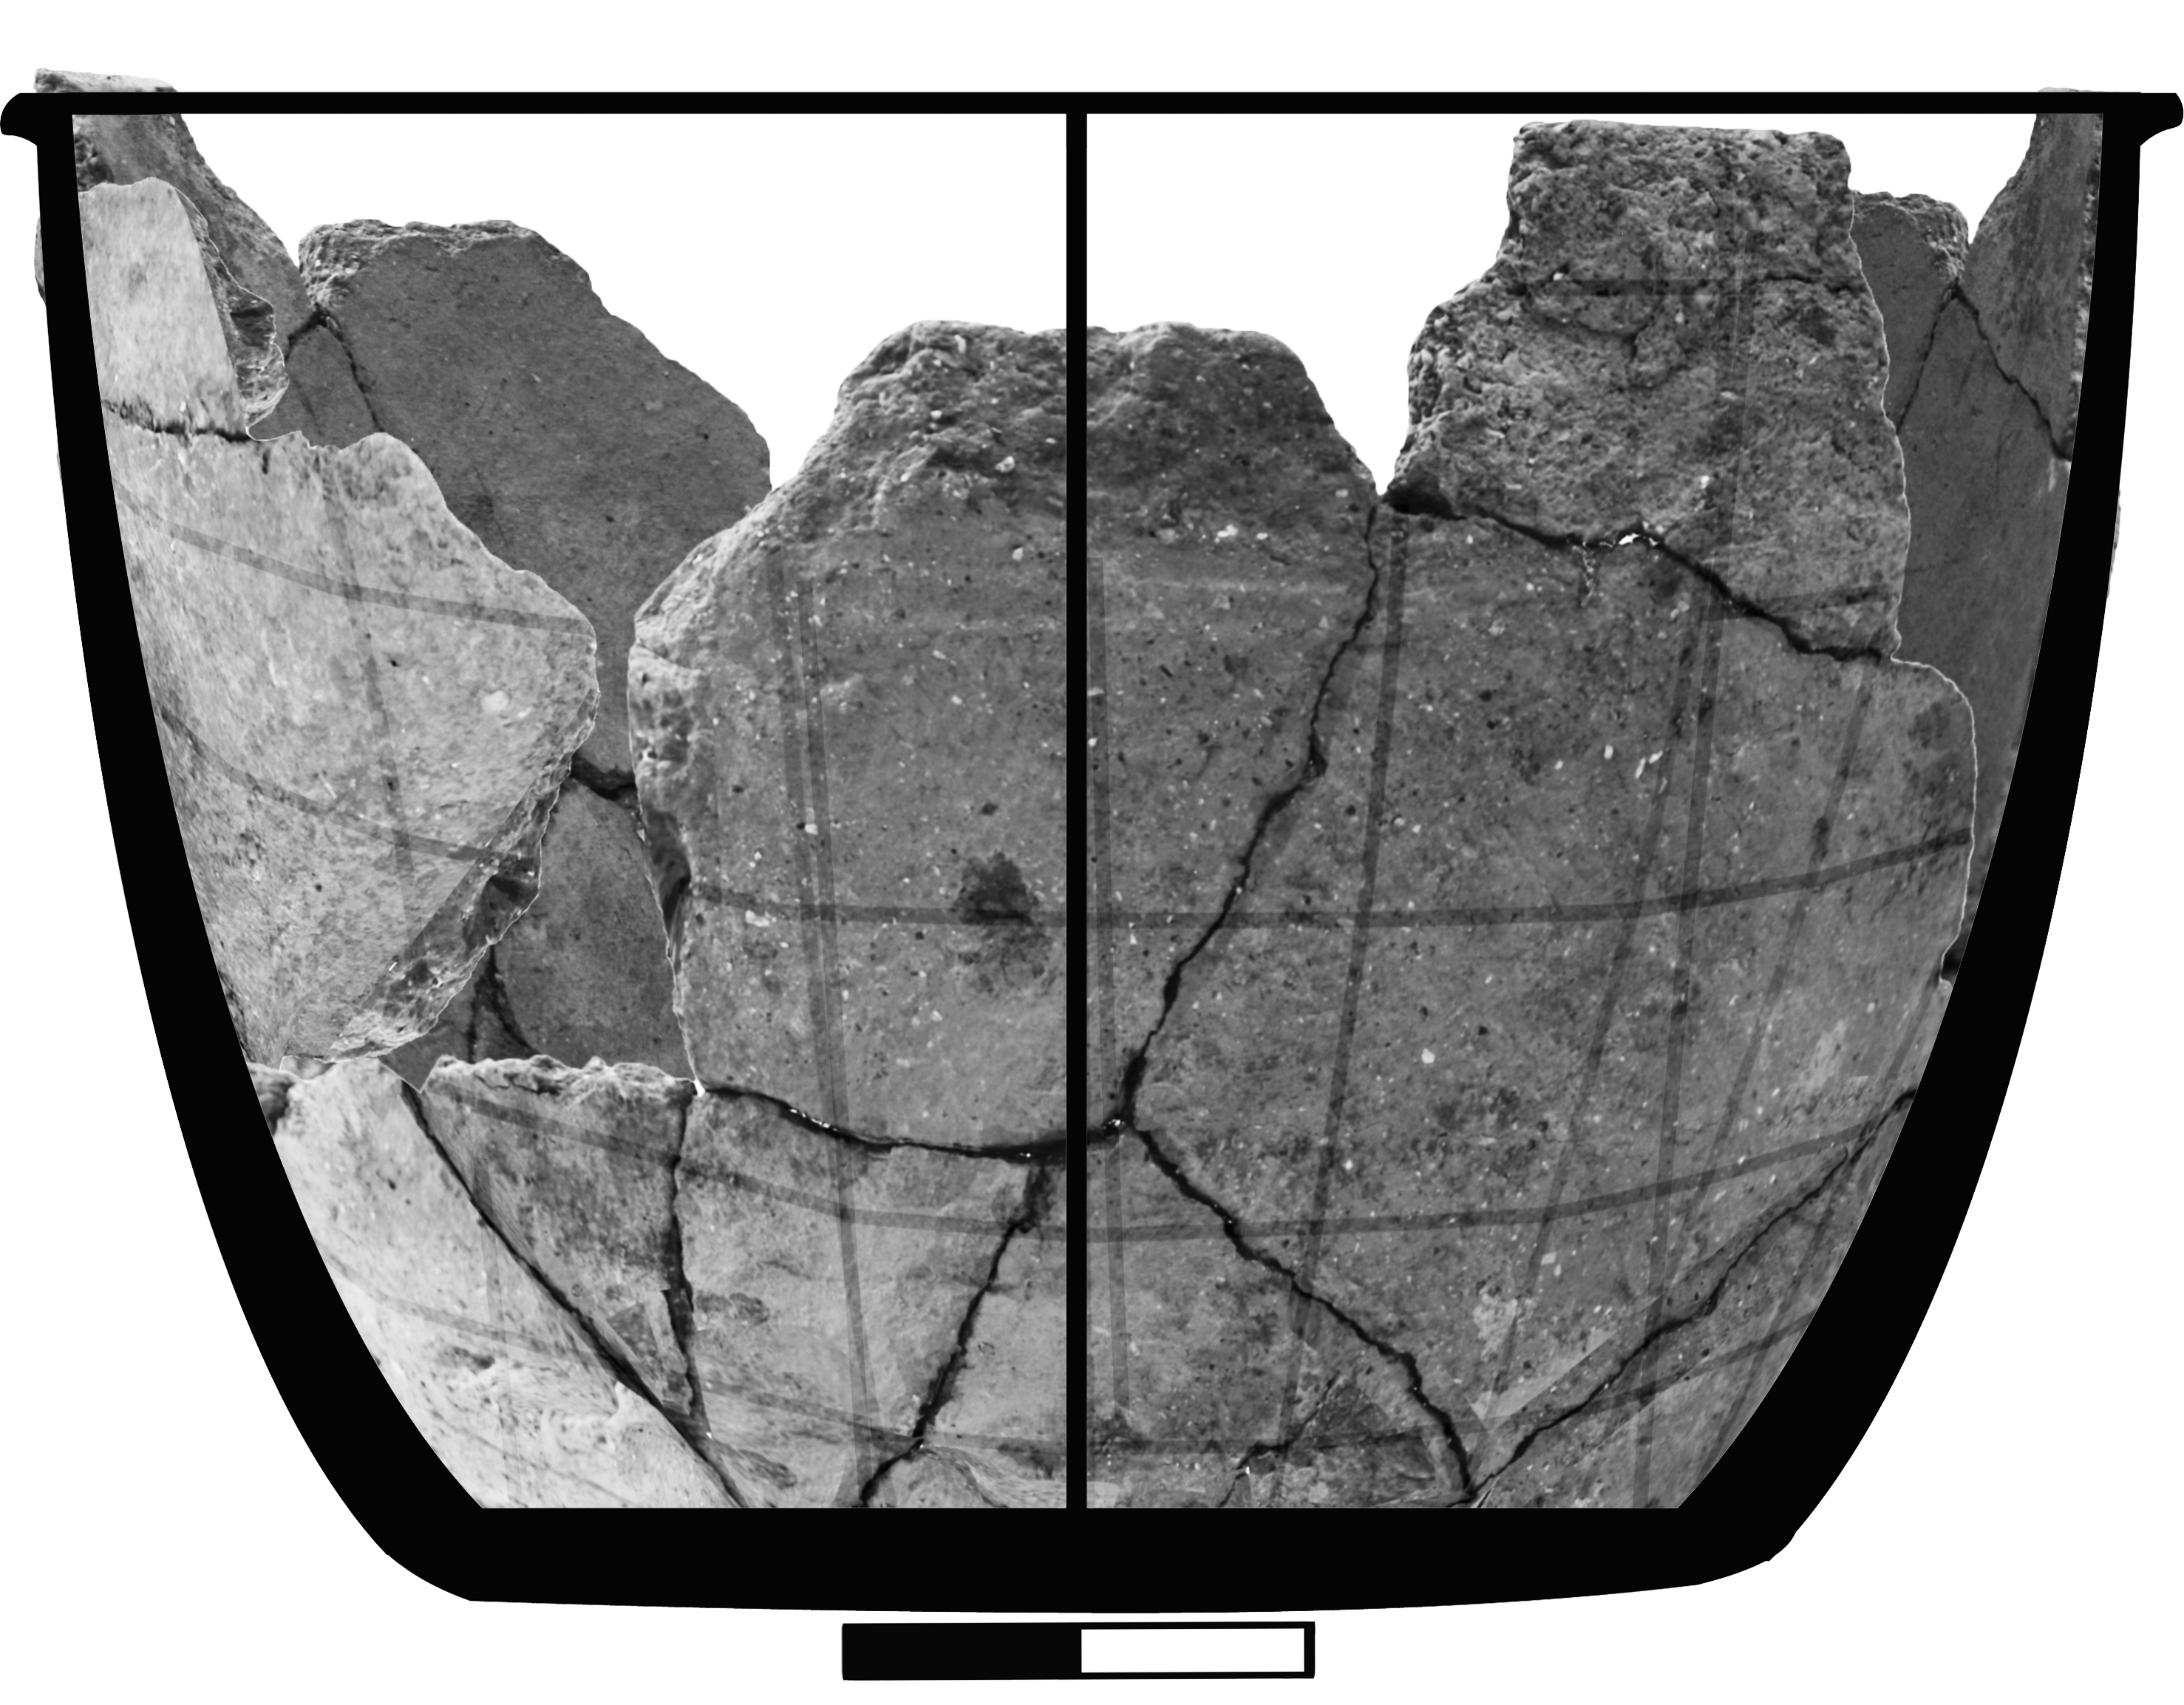 | |
| **A** | **Β** | **Γ** | **Δ** | **Ε** | **Ζ** | **Η** | **Θ** | **Ι** |
| **1** | **Βy** (±1nΤ) |  |  | **16** | **16** |  | **17** |  | **6** |  |
| **Bx**(±1nΤ) | **10** | **3** | **-23** | **-39** |
| **Bz**(±1nΤ) | **33** | **14** | **37** | **38** |
| **B**(±1nΤ) | **38** | **38** | **47** | **55** |
| **θΒο** | **65±**1 | **65±**2 | **68±**1 | **84±**1 |
| **φΒο** | **73±**1 | **85±**2 | **122±**1 | **136±**1 |
| **2** | **Βy** (±1nΤ) |  | **14** | **15** | **17** | **18** | **12** | **10** | **8** | **2** |
| **Bx**(±1nΤ) | **27** | **13** | **2** | **-11** | **-16** | **-27** | **-30** | **-35** |
| **Bz**(±1nΤ) | **45** | **41** | **38** | **40** | **34** | **33** | **33** | **33** |
| **B**(±1nΤ) | **54** | **46** | **42** | **45** | **40** | **44** | **45** | **48** |
| **θΒο** | **75±**1 | **71±**1 | **66±**2 | **66±**1 | **72±**2 | **77±**1 | **80±**1 | **88±**1 |
| **φΒο** | **59±**1 | **72±**1 | **87±**2 | **105±**1 | **115±**2 | **129±**1 | **132±**1 | **137±**1 |
|  | **Βy** (±1nΤ) | **6** | **11** | **13** | **12** | **14** | **10** | **7** | **1** | **-2** |
| **3** | **Bx**(±1nΤ) | **33** | **21** | **4** | **6** | **-8** | **-24** | **-32** | **-40** | **-35** |
| **Bz**(±1nΤ) | **37** | **38** | **40** | **41** | **43** | **43** | **43** | **39** | **32** |
| **B**(±1nΤ) | **50** | **45** | **42** | **43** | **46** | **50** | **54** | **56** | **47** |
| **θΒο** | **83±**1 | **76±**1 | **72±**1 | **74±**1 | **72±1** | **78±**1 | **82±**1 | **89±**1 | **-88±**1 |
| **φΒο** | **48±**1 | **61±**1 | **84±**1 | **82±**1 | **101±1** | **119±**1 | **127±**1 | **136±**1 | **138±**1 |
| **4** | **Βy** (±1nΤ) |  |  | **9** | **9** | **11** | **6** | **4** | **-1** | **-6** |
| **Bx**(±1nΤ) | **12** | **1** | **-9** | **-26** | **-27** | **-35** | **-38** |
| **Bz**(±1nΤ) | **49** | **44** | **51** | **41** | **40** | **34** | **32** |
| **B**(±1nΤ) | **51** | **45** | **53** | **49** | **48** | **49** | **50** |
| **θΒο** | **80±**1 | **78±**1 | **78±1** | **83±**1 | **85±**1 | **-89±**1 | **-83±**1 |
| **φΒο** | **76±**1 | **89±**1 | **100±1** | **122±**1 | **124±**1 | **136±**1 | **140±**1 |
| **5** | **Βy** (±1nΤ) |  |  | **6** | **7** | **7** | **3** | **-1** | **-5** | **-9** |
| **Bx**(±1nΤ) | **8** | **3** | **-11** | **-19** | **-32** | **-39** | **-41** |
| **Bz**(±1nΤ) | **51** | **51** | **48** | **44** | **43** | **35** | **33** |
| **B**(±1nΤ) | **52** | **52** | **50** | **48** | **54** | **53** | **53** |
| **θΒο** | **83±**1 | **82±**1 | **82±**1 | **86±**1 | **-89±**1 | **-84±**1 | **-80±**1 |
|  | **81±**1 | **87±1** | **103±**1 | **113±**1 | **127±**1 | **138±**1 | **141±**1 |

**Table 12.** *Indicative sensor readings with the x-sensor oriented in the grooves’ direction on the body fragments of* ***vase 4.***

**
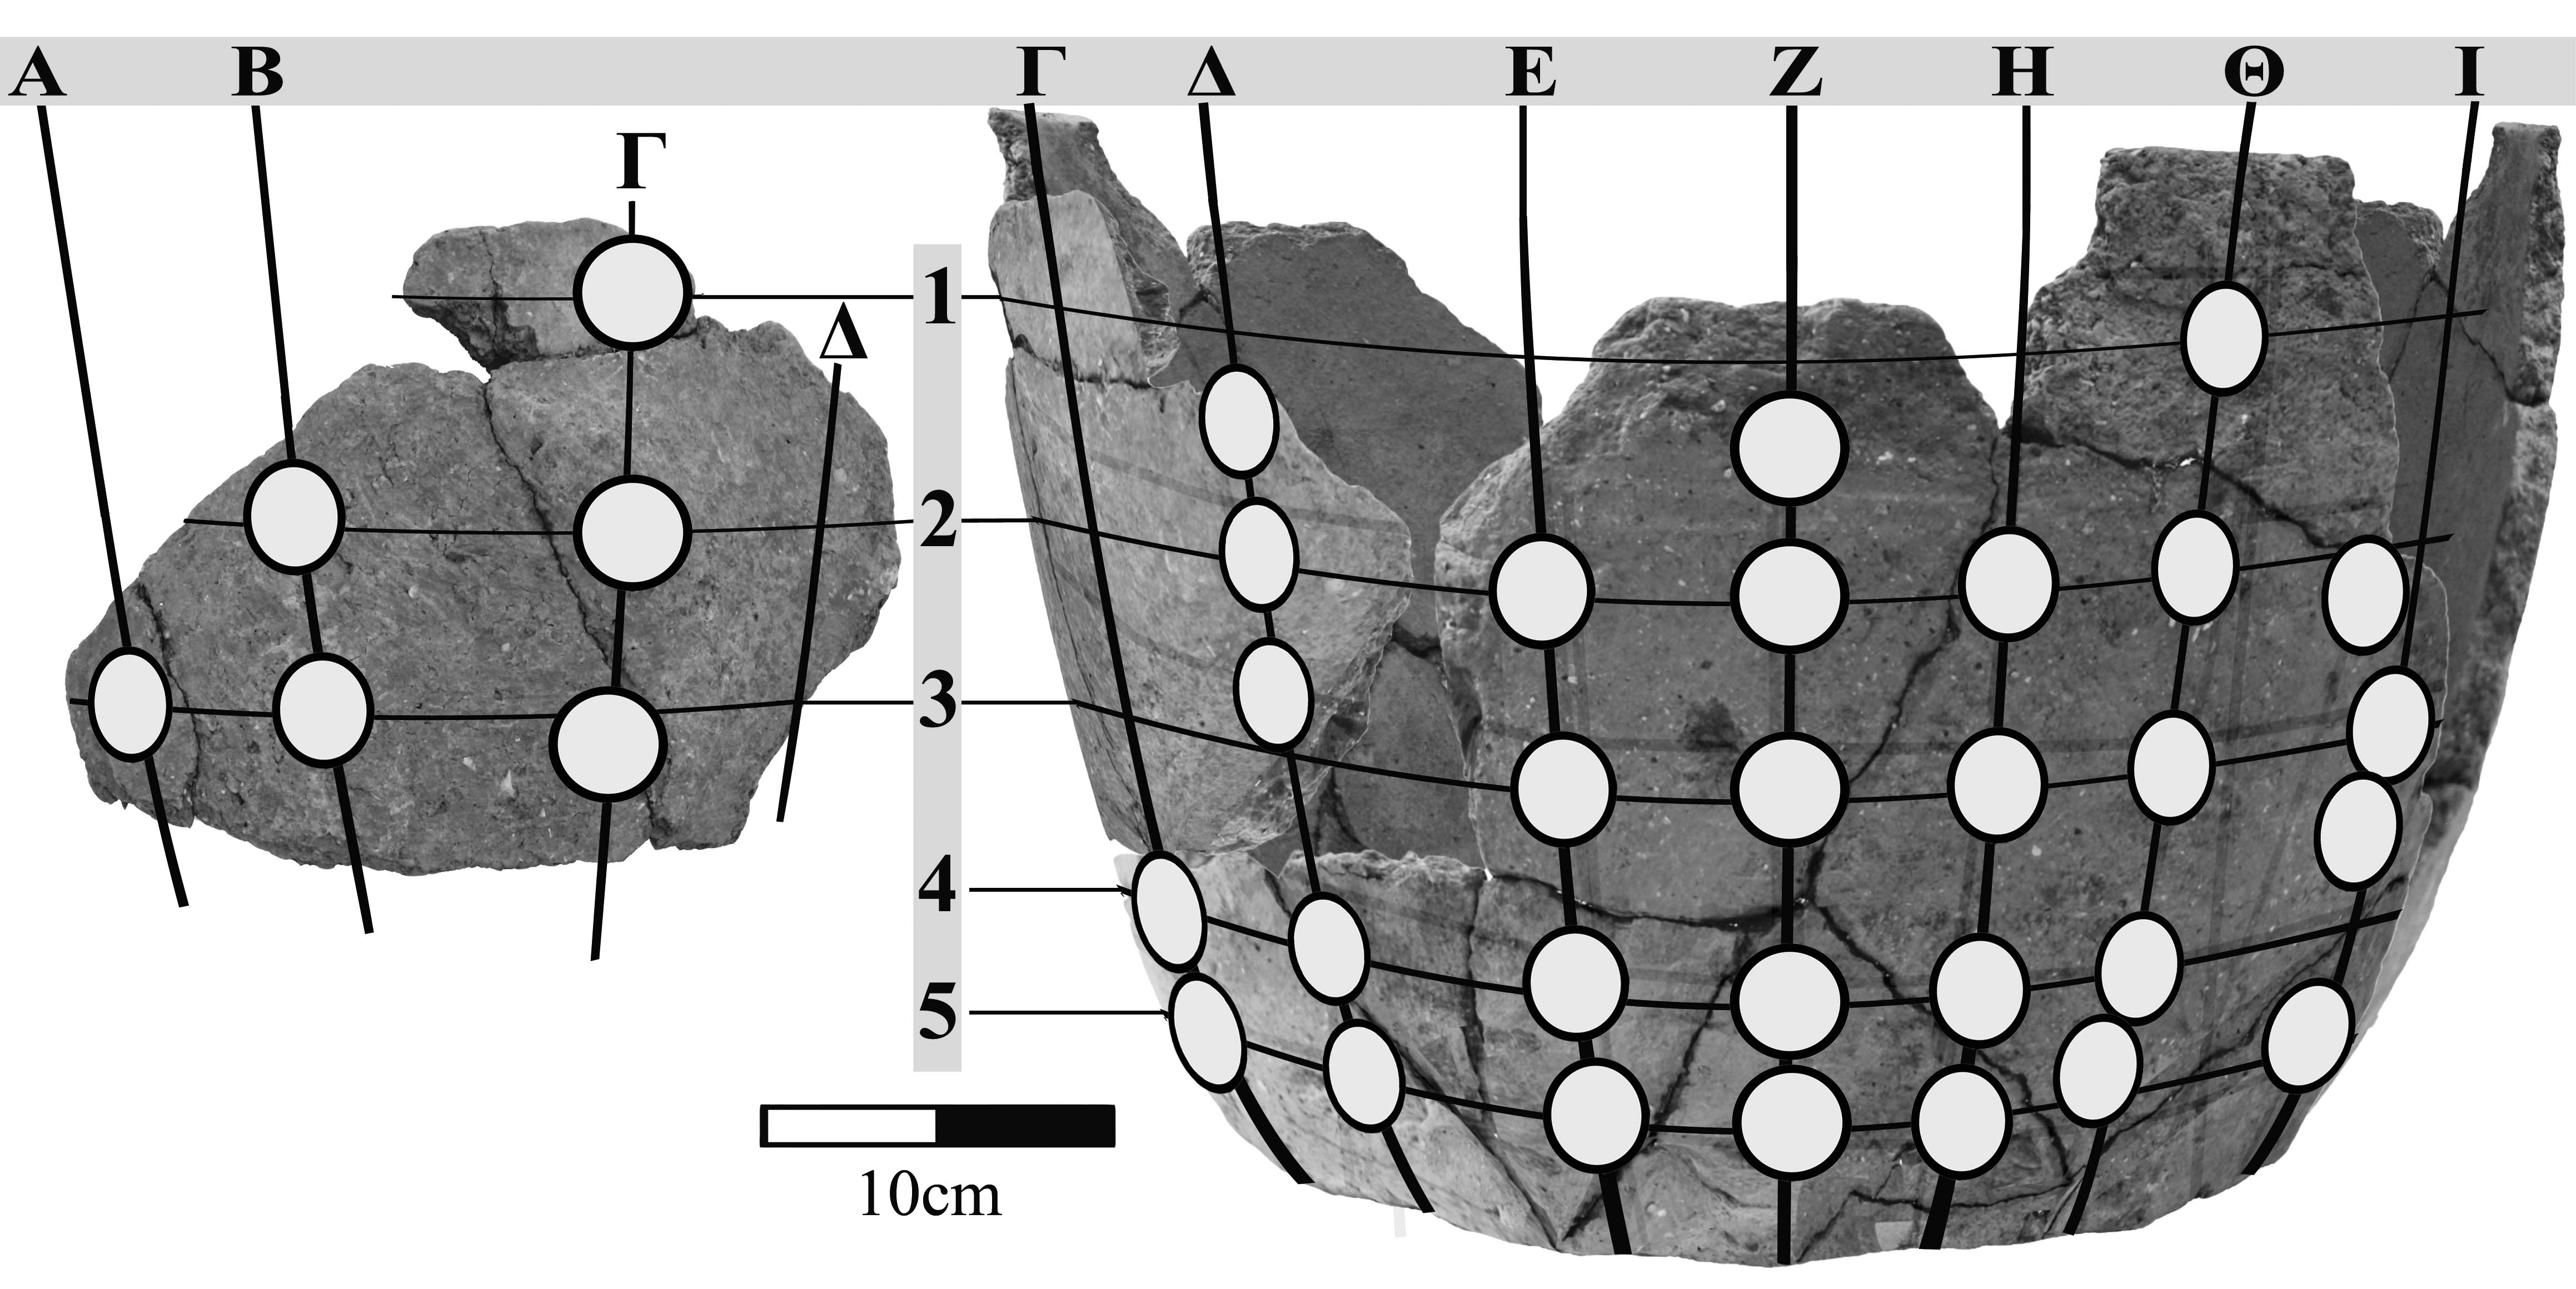
**

| **Vase 5** | |  | | | **αy˪(cm)** | | | **αx,z//(cm)** | | | **λ** | |
| --- | --- | --- | --- | --- | --- | --- | --- | --- | --- | --- | --- | --- |
| **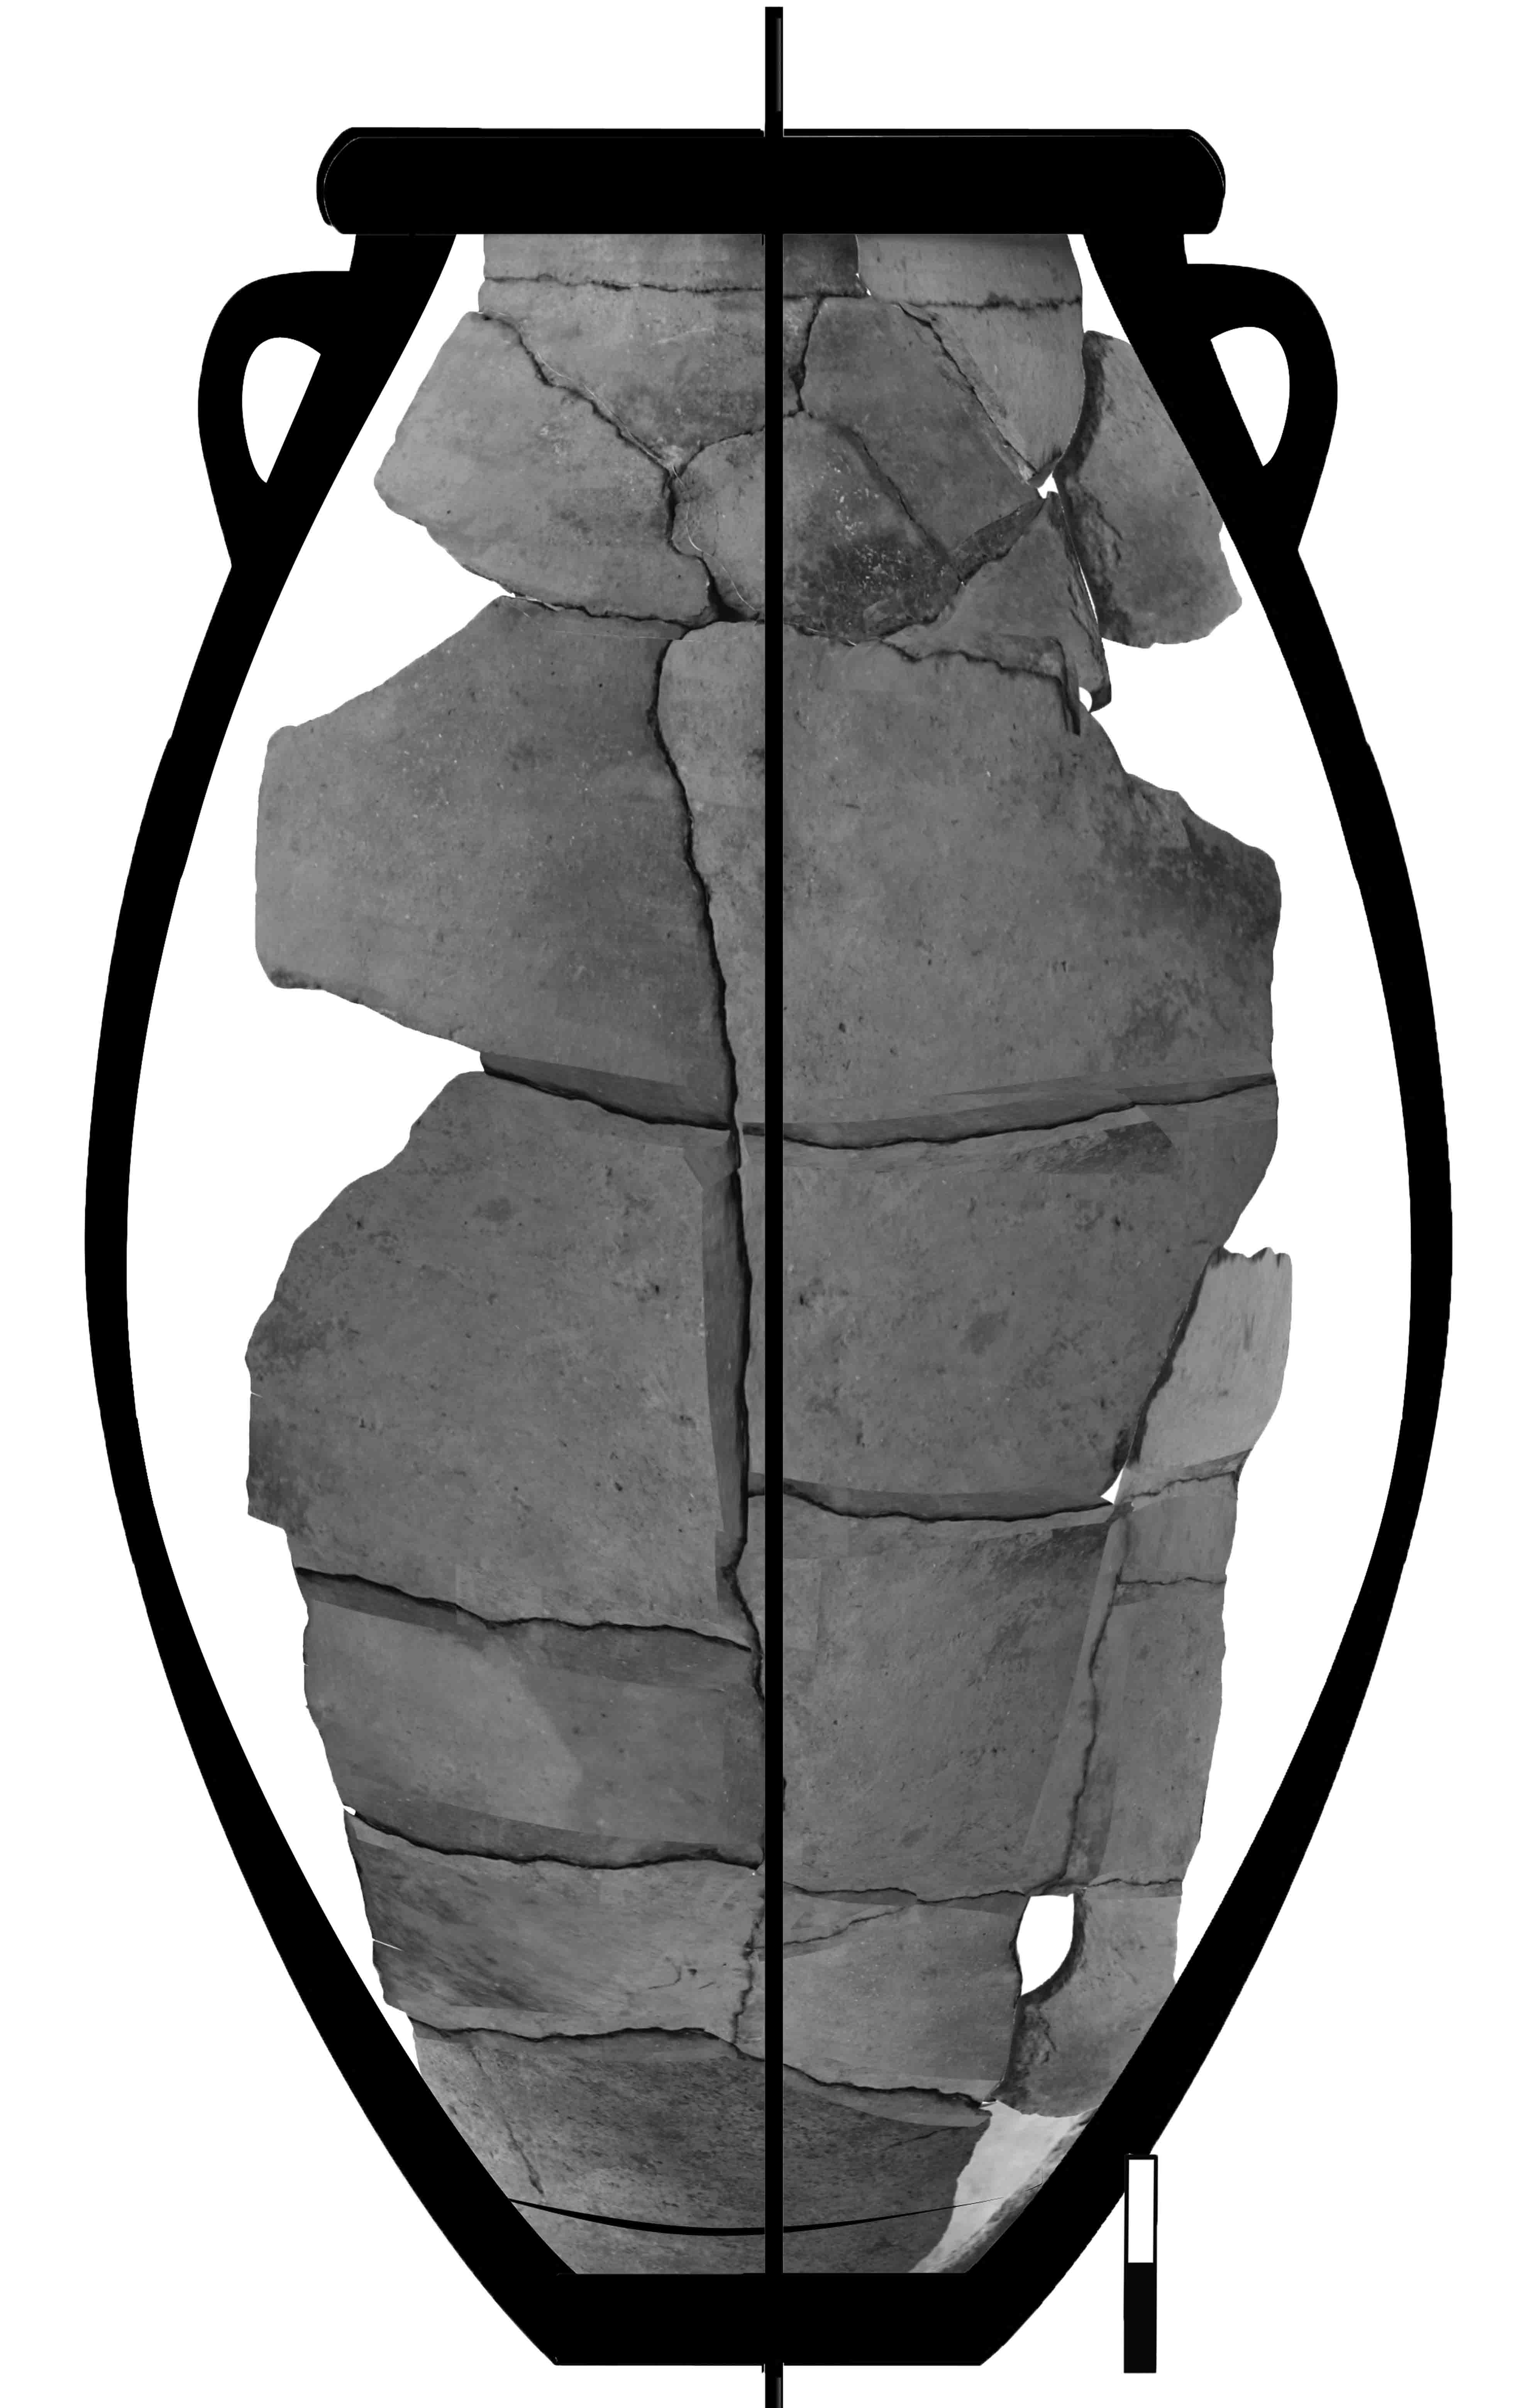** | | **1,04±0,03** | | | **1,41±0,03** | | | **2,03±0,01** | |
|  | | | | | | | | | | |
|  | | | | | | | | | | |
| **A** | **Β** | **Γ** | | **Δ** | **Ε** | | **Ζ** | **Η** | | **Θ** |
| **1** | **D** (±0.3) cm | **10.4** | **2.2** | **4.7** | | **1.8** | **10.4** | | **7.6** | **3.3** | | **1.2** |
| **L** (±0.1) cm | **2.9** | **2.8** | **2.7** | | **2.7** | **2.6** | | **2.6** | **2.5** | | **2.6** |
| **Bxz** (±1)nT | **45** | **53** | **58** | | **62** | **66** | | **66** | **71** | | **67** |
| **By** (±1)nT | **-24** | **-22** | **-19** | | **-17** | **-14** | | **-9** | **-7** | | **-6** |
| **B**(±1)nT | **51** | **57** | **61** | | **64** | **67** | | **67** | **71** | | **67** |
| **θΒο** | **-62±1** | **-68±1** | **-72±1** | | **-75±1** | **-78±1** | | **-82±1** | **-84±1** | | **-85±1** |
| **2** | **D** (±0.3) cm | **3.0** | **6.0** | **7.1** | | **8.6** | **6.9** | | **3.8** | **1.8** | | **4.7** |
| **L** (±0.1) cm | **2.4** | **2.4** | **2.3** | | **2.3** | **2.3** | | **2.2** | **2.2** | | **2.2** |
| **Bxz** (±1)nT | **55** | **57** | **61** | | **64** | **64** | | **70** | **70** | | **72** |
| **By** (±1)nT | **-21** | **-20** | **-18** | | **-15** | **-12** | | **-6** | **-7** | | **-1** |
| **B**(±1)nT | **59** | **60** | **64** | | **66** | **65** | | **70** | **70** | | **72** |
| **θΒο** | **-69±1** | **-71±1** | **-74±1** | | **-77±1** | **-80±1** | | **-85±1** | **-84±1** | | **-89±1** |
| **3** | **D** (±0.3) cm | **15.4** | **25.0** | **26.4** | | **32.1** | **23.1** | | **6.7** | **4.8** | |  |
| **L** (±0.1) cm | **2.2** | **2.2** | **2.1** | | **2.0** | **2.0** | | **2.0** | **1.9** | |
| **Bxz** (±1)nT | **53** | **60** | **64** | | **66** | **66** | | **68** | **68** | |
| **By** (±1)nT | **-21** | **-19** | **-15** | | **-14** | **-10** | | **-11** | **-3** | |
| **B**(±1)nT | **57** | **63** | **66** | | **67** | **67** | | **69** | **68** | |
| **θΒο** | **-69±1** | **-73±1** | **-77±1** | | **-78±1** | **-82±1** | | **-81±1** | **-88±1** | |
| **4** | **D** (±0.3) cm | **7.4** | **12.9** | **4,3** | | **20.7** | **20.8** | | **13.1** | **6.4** | |  |
| **L** (±0.1) cm | **2.0** | **2.0** | **1.9** | | **1.9** | **1.8** | | **1.8** | **1.7** | |
| **Bxz** (±1)nT | **41** | **49** | **57** | | **61** | **61** | | **65** | **66** | |
| **By** (±1)nT | **-26** | **-24** | **-20** | | **-17** | **-17** | | **-14** | **-11** | |
| **B**(±1)nT | **48** | **54** | **60** | | **63** | **63** | | **66** | **67** | |
| **θΒο** | **-58±1** | **-64±1** | **-71±1** | | **-75±1** | **-75±1** | | **-78±1** | **-81±1** | |
| **5** | **D** (±0.3) cm |  | **28.4** | **6.0** | | **20.0** | **14.2** | | **9.2** | **3.6** | |  |
| **L** (±0.1) cm | **1.7** | **1.6** | | **1.5** | **1.5** | | **1.5** | **1.4** | |
| **Bxz** (±1)nT | **38** | **50** | | **51** | **57** | | **62** | **64** | |
| **By** (±1)nT | **-27** | **-23** | | **-22** | **-19** | | **-16** | **-14** | |
| **B**(±1)nT | **46** | **55** | | **55** | **60** | | **64** | **65** | |
| **θΒο** | **-55±11** | **-66±1** | | **-67±1** | **-72±1** | | **-76±1** | **-78±1** | |

**Table 13a**. *Measurements D, L, and sensor readings of Bi (i=xz,y), with the x-sensor aligned along the common direction of Bxz, Μxz, on the body fragments of* ***vase 5****.*

**
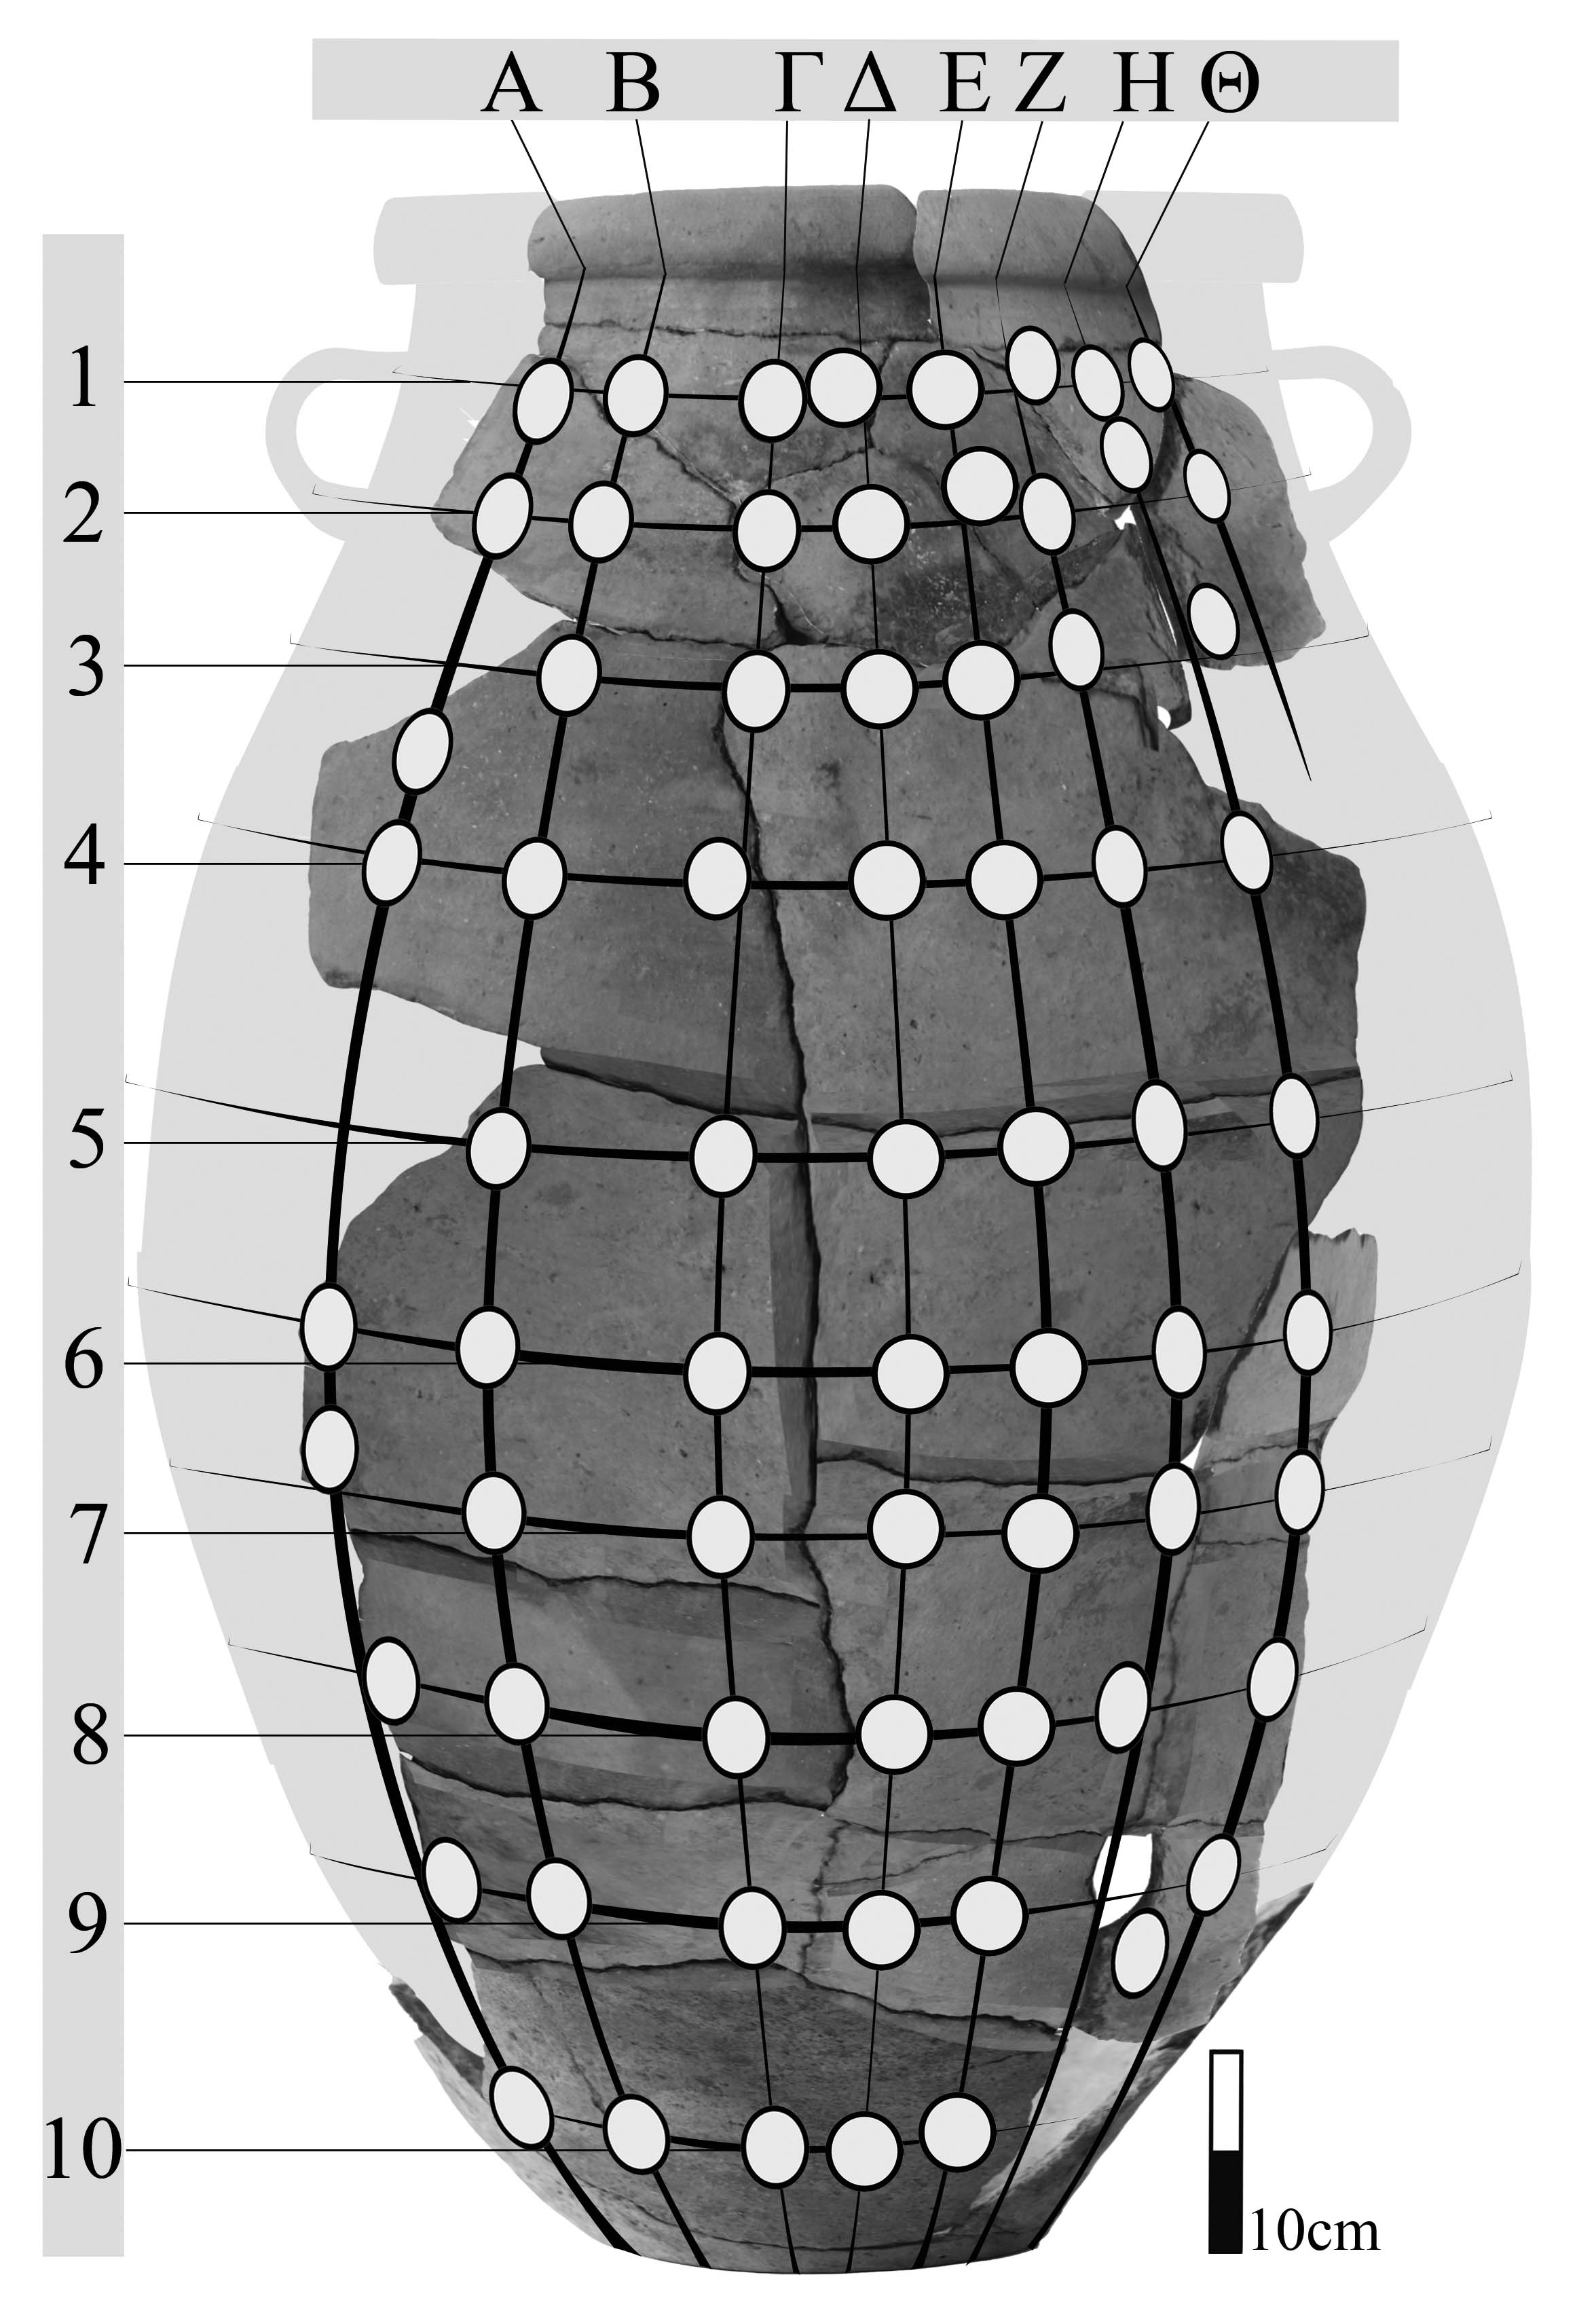
**

***,***

| **Vase 5** | | | |
| --- | --- | --- | --- |
| 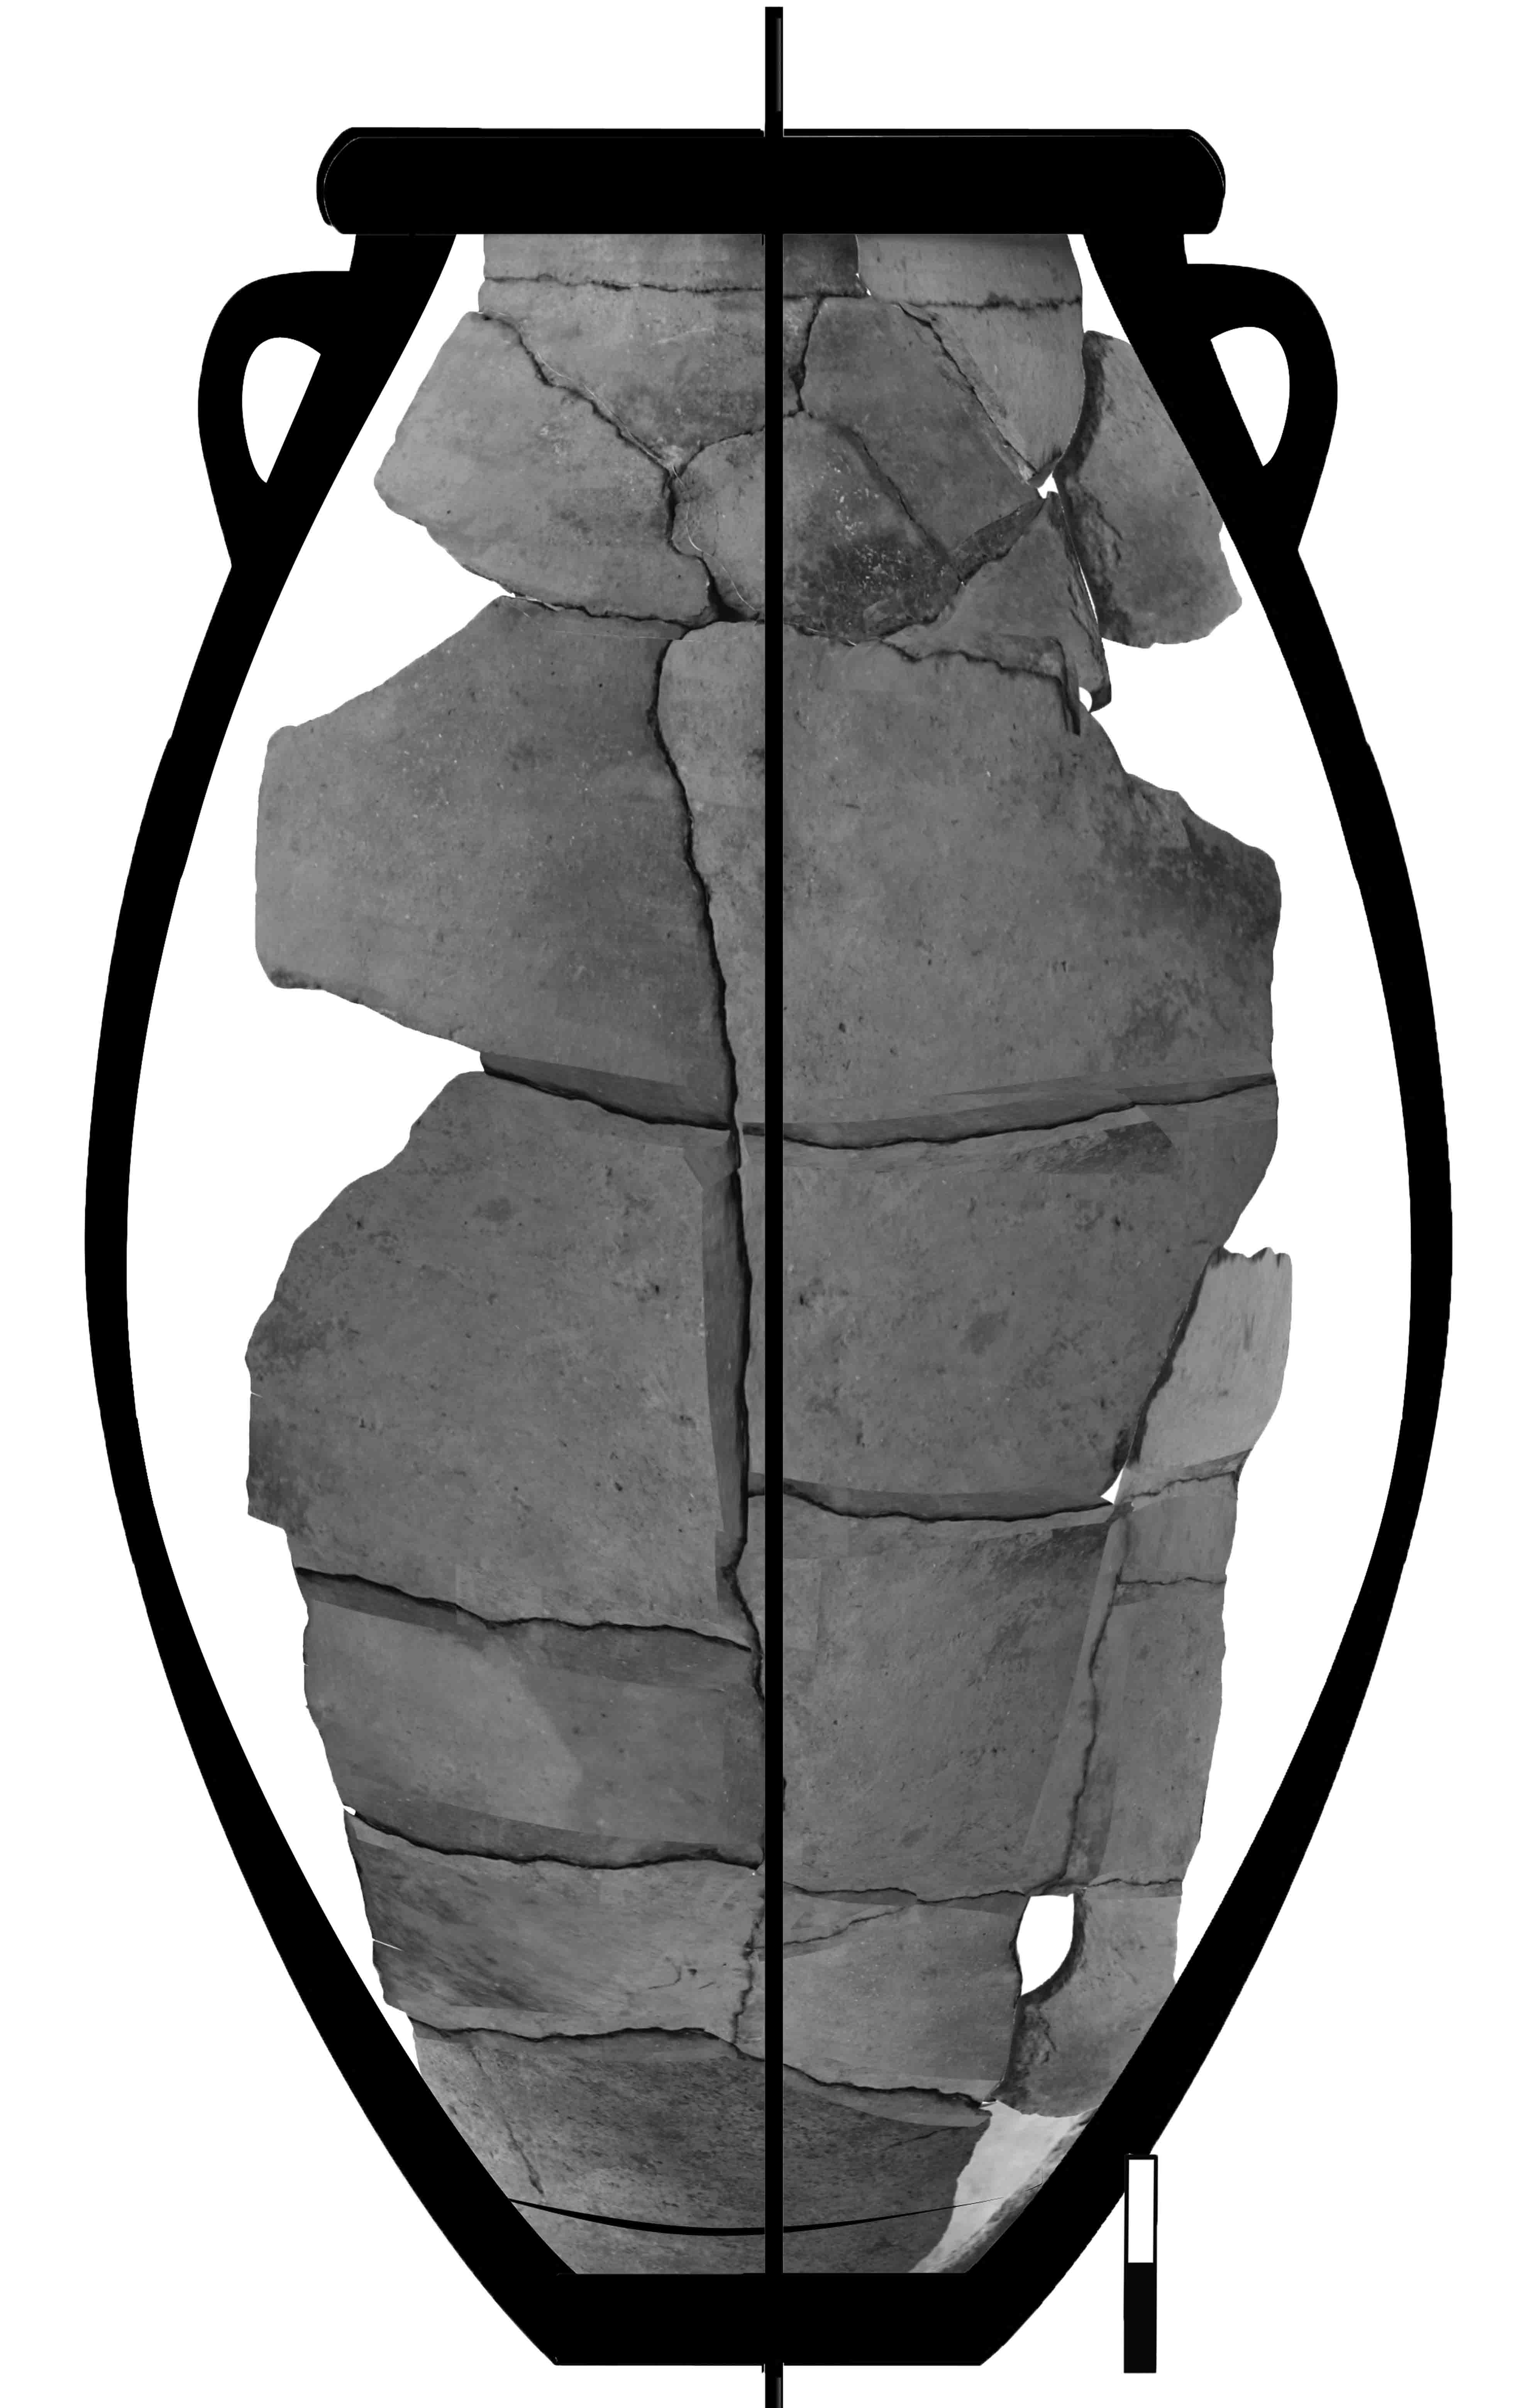 | | | |
|
|
| **A** | **Β** | **Γ** | **Δ** | **Ε** | **Ζ** | **Η** | **Θ** |
| **6** | | **D** (±0.3) cm | | **12.9** | **17.1** | **6.1** | **15,5** | **9,.0** | **3.0** | **3.3** |  |
| **L** (±0.1) cm | | **1.4** | **1.4** | **1.4** | **1.4** | **1.4** | **1.3** | **1.3** |
| **Bxz** (±1)nT | | **21** | **22** | **34** | **41** | **51** | **56** | **59** |
| **By** (±1)nT | | **-29** | **-29** | **-26** | **-25** | **-21** | **-21** | **-17** |
| **B**(±1)nT | | **35** | **36** | **43** | **48** | **55** | **60** | **61** |
| **θΒο** | | **-36±2** | **-38±2** | **-53±1** | **-59±1** | **-68±1** | **-70±1** | **-74±1** |
| **7** | | **D** (±0.3) cm | | **4.5** | **6.3** | **5.3** | **14.9** | **8.0** | **1.8** | **1.4** |  |
| **L** (±0.1) cm | | **2.5** | **1.5** | **1.4** | **1.4** | **1.5** | **1.5** | **1.5** |
| **Bxz** (±1)nT | | **16** | **25** | **27** | **37** | **53** | **53** | **51** |
| **By** (±1)nT | | **-30** | **-28** | **-27** | **-26** | **-22** | **-19** | **-18** |
| **B**(±1)nT | | **34** | **37** | **38** | **45** | **57** | **56** | **54** |
| **θΒο** | | **-28±2** | **-42±2** | **-45±2** | **-55±1** | **-68±1** | **-71±1** | **-71±1** |
| **8** | | **D** (±0.3) cm | | **9.1** | **10.0** | **5.7** | **13.8** | **7.6** | **2.0** | **1.7** |  |
| **L** (±0.1) cm | | **1.6** | **1.7** | **1.6** | **1.6** | **1.6** | **1.7** | **1.7** |
| **Bxz** (±1)nT | | **8** | **19** | **28** | **40** | **47** | **52** | **54** |
| **By** (±1)nT | | **-32** | **-31** | **-29** | **-25** | **-24** | **-22** | **-21** |
| **B**(±1)nT | | **33** | **36** | **40** | **47** | **53** | **56** | **58** |
| **θΒο** | | **-14±2** | **-32±2** | **-44±1** | **-58±1** | **-63±1** | **-67±1** | **-69±1** |
| **9** | | **D** (±0.3) cm | | **5.3** | **13.5** | **3.7** | **11.1** | **5.6** | **5.5** | **2.4** |  |
| **L** (±0.1) cm | | **1.7** | **1.7** | **1.7** | **1.8** | **1.8** | **1.9** | **1.9** |
| **Bxz** (±1)nT | | **11** | **24** | **34** | **38** | **44** | **49** | **56** |
| **By** (±1)nT | | **-31** | **-29** | **-27** | **-27** | **-26** | **-23** | **-20** |
| **B**(±1)nT | | **33** | **37** | **43** | **46** | **51** | **54** | **59** |
| **θΒο** | | **-19±2** | **-40±2** | **-52±1** | **-55±1** | **-60±1** | **-65±1** | **-71±1** |
| **10** | |  | | **7,8** | **21.7** | **15.2** | **9.9** | **4.2** |  |  |  |
|  | | **2,1** | **2.1** | **2.2** | **2.3** | **2.3** |
|  | | **17** | **22** | **31** | **37** | **43** |
|  | | **-32** | **-31** | **-30** | **-28** | **-27** |
|  | | **36** | **38** | **43** | **46** | **51** |
|  | | **-28±2** | **-36±2** | **-46±1** | **-53±1** | **-58±1** |
|  |  | |

**Table 13b**. *Measurements D, L, and sensor readings of Bi (i=xz,y), with the x-sensor aligned along the common direction of Bxz, Μxz, on the body fragments of* ***vase 5****.*


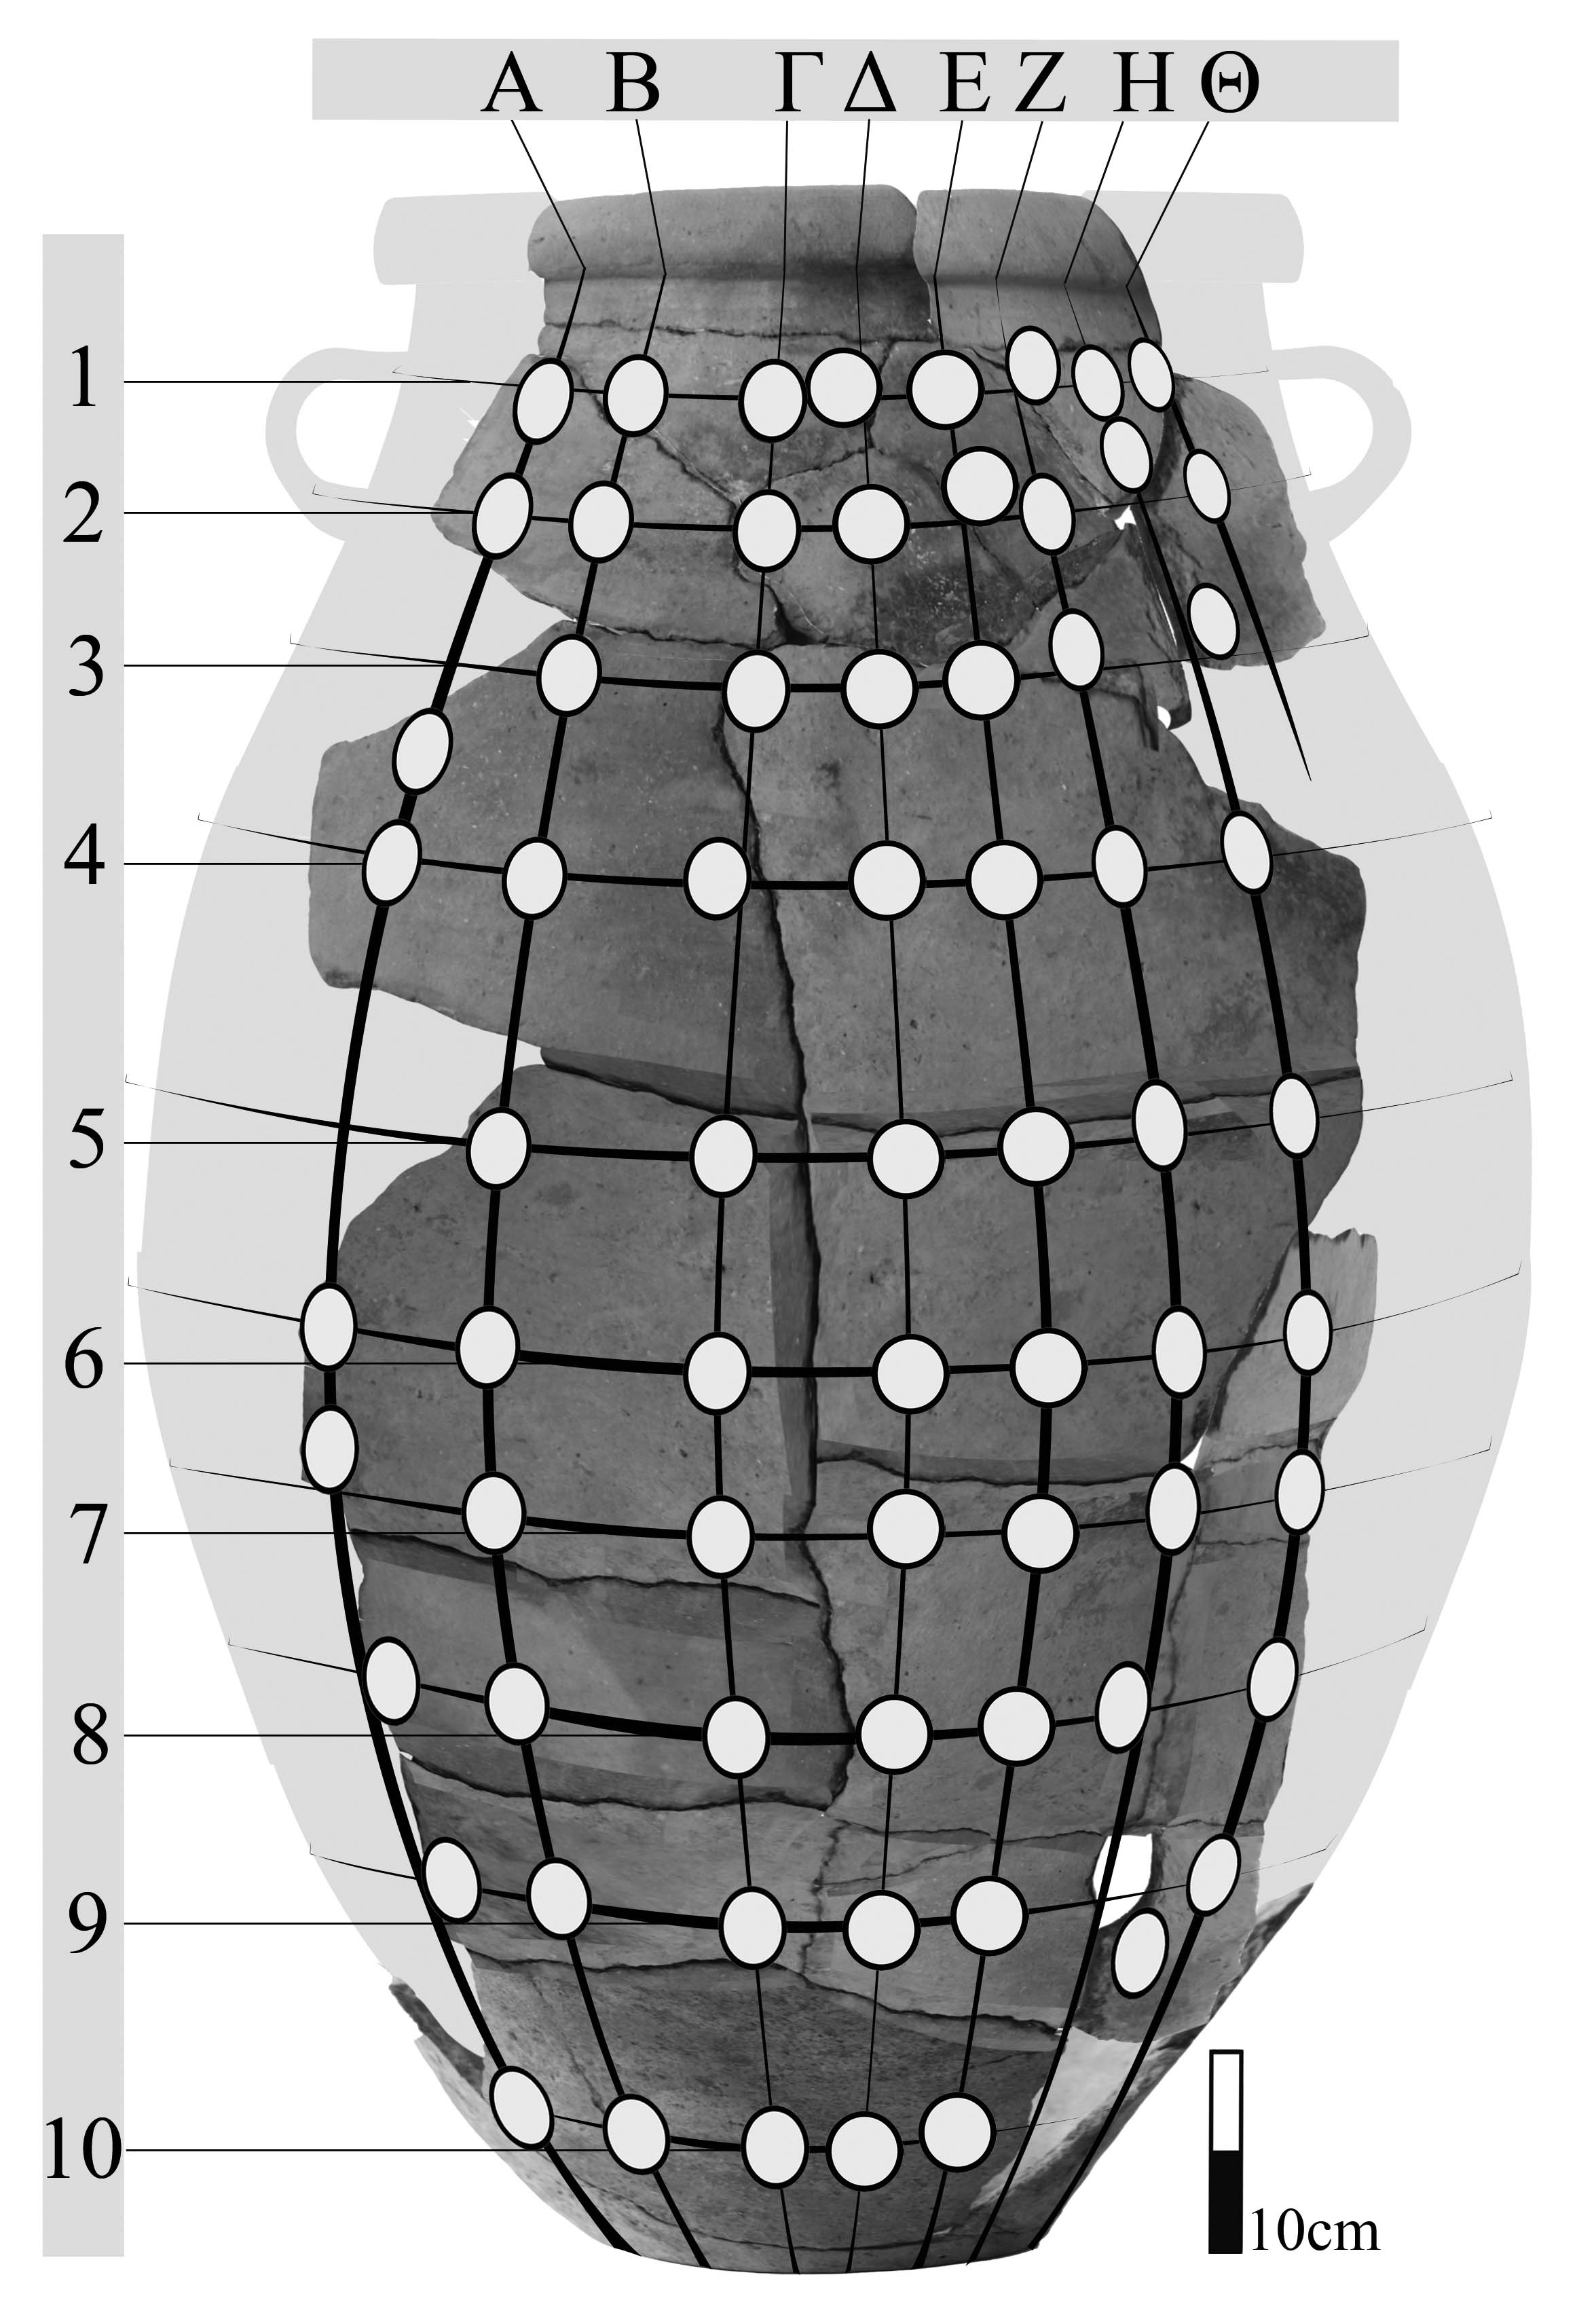


| **Vase 5** | |
| --- | --- |
| 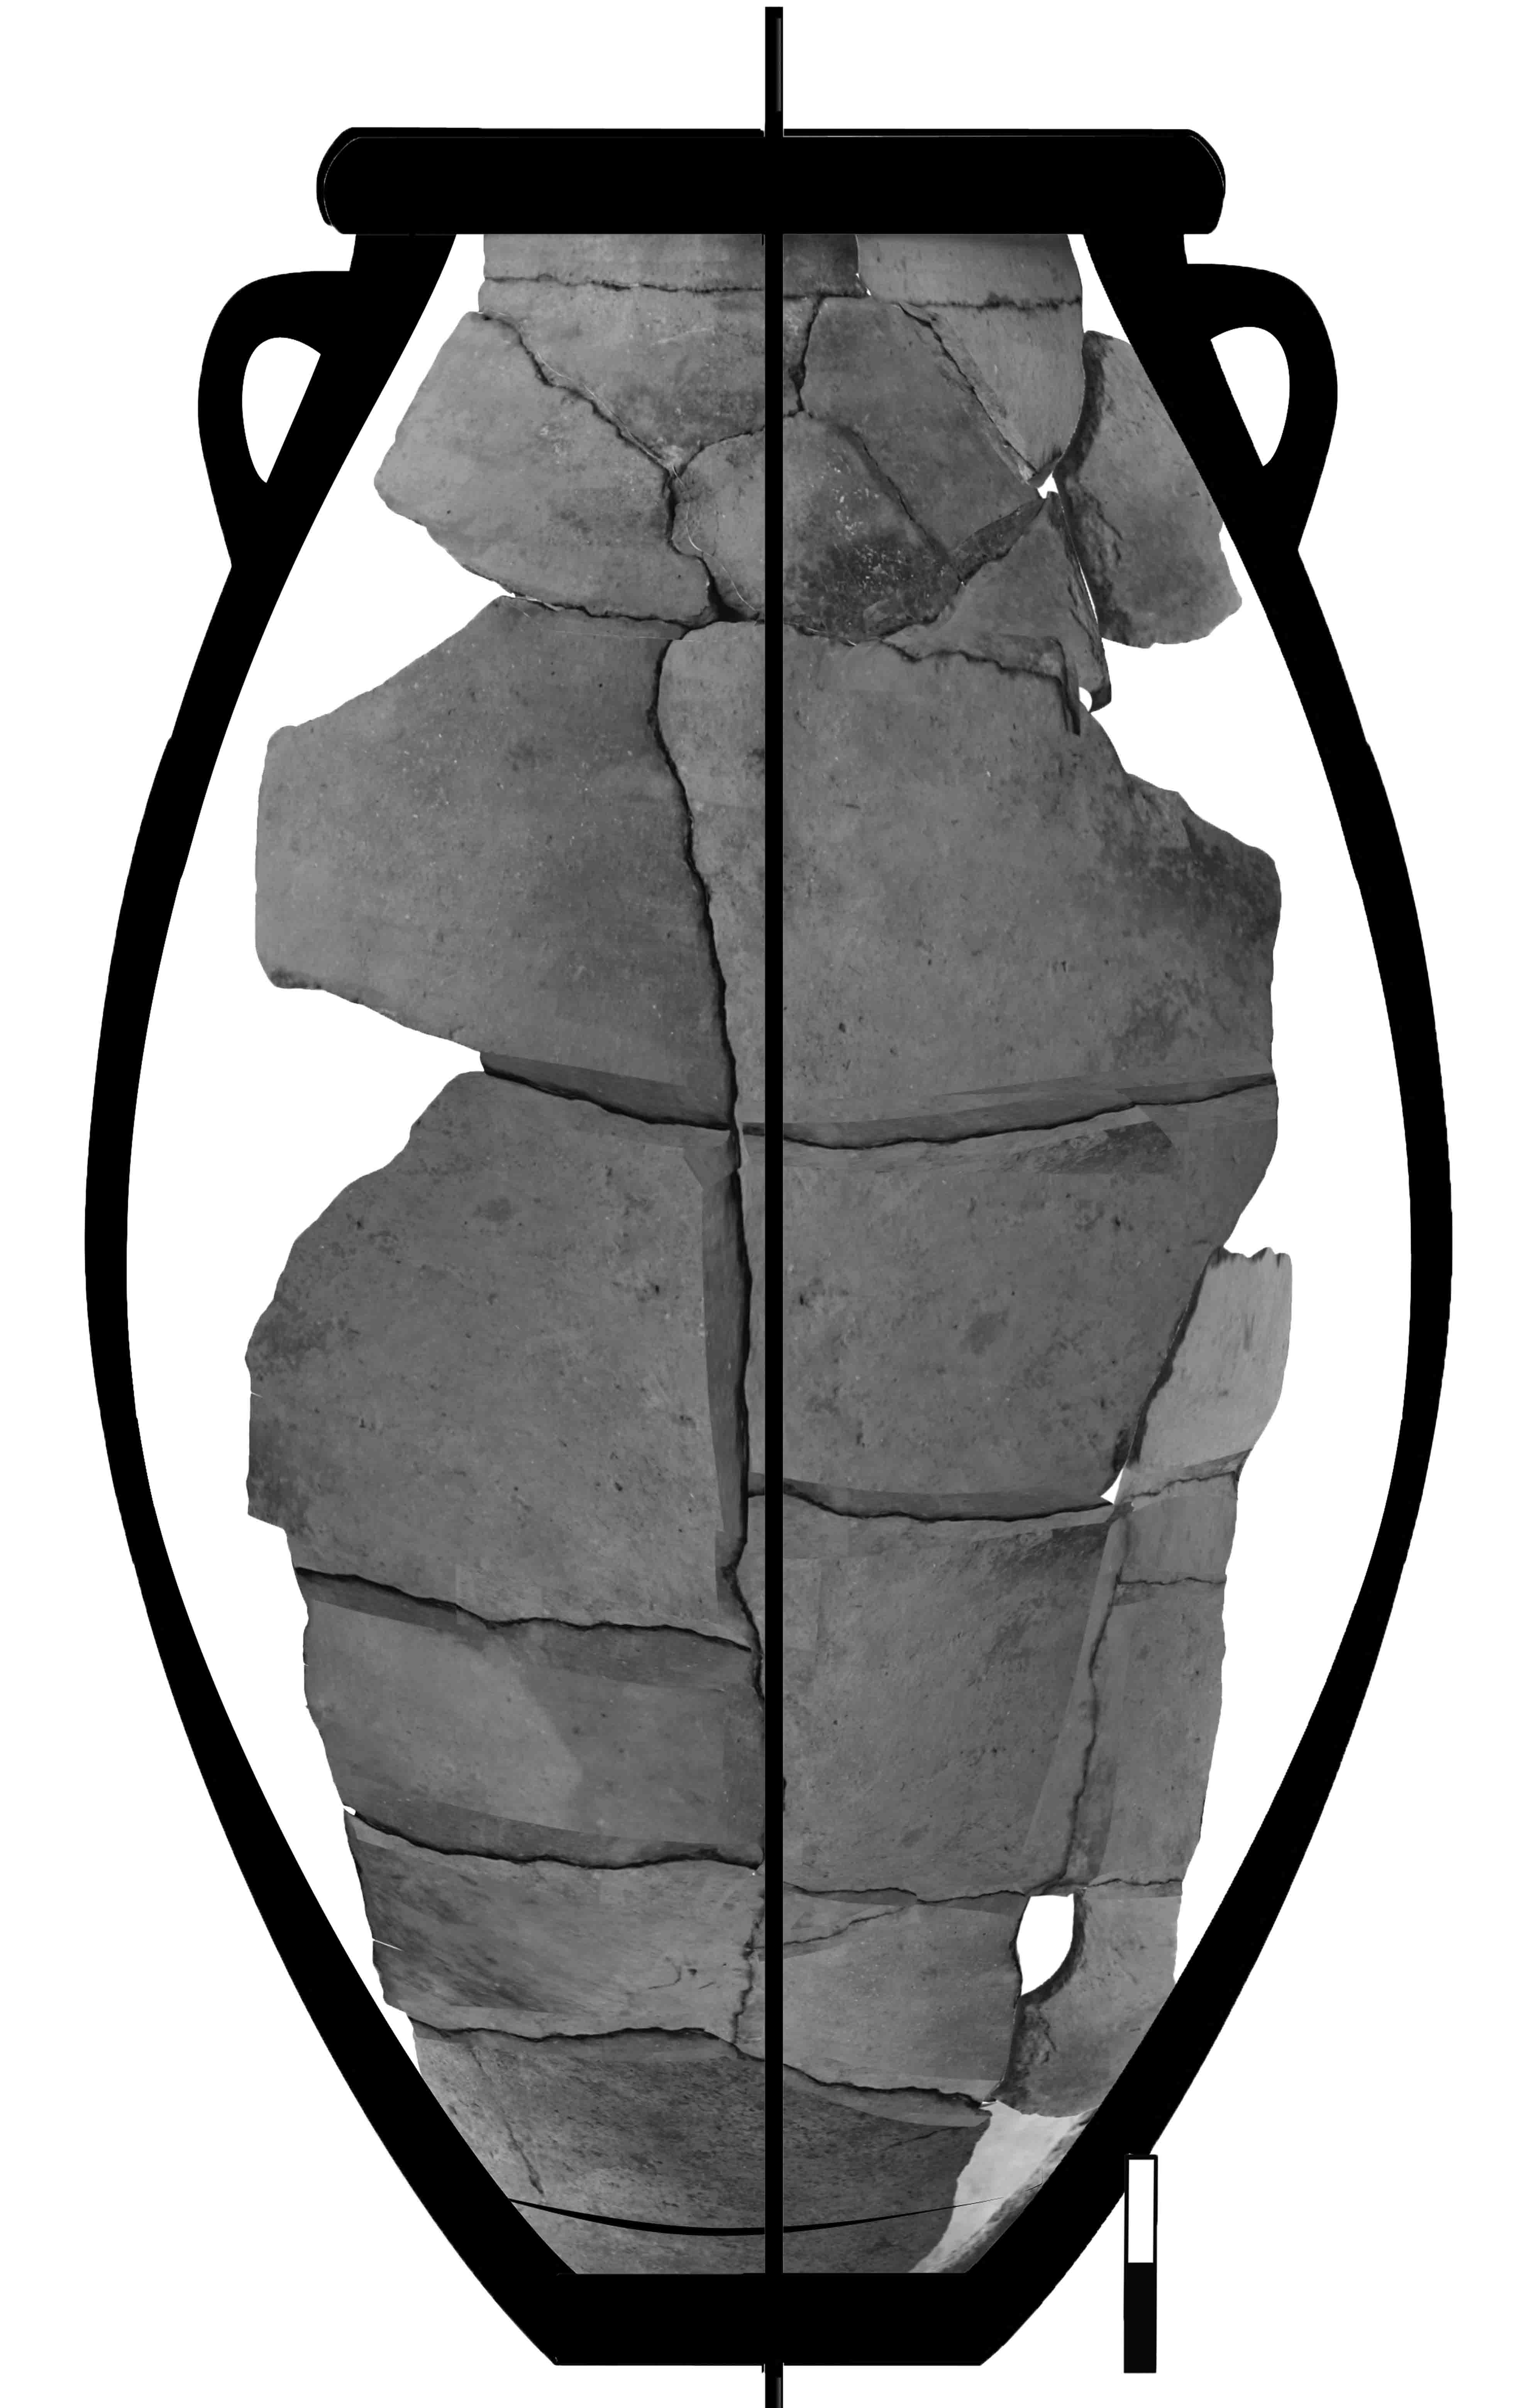 | |
|
|
|  | | | | |  | | |
| **A** | **Β** | **Γ** | **Δ** | **Ε** | **Ζ** | **Η** | **Θ** |
| **1** | **Βy** (±1nΤ) | **-23** | **-23** | **-19** | **-17** | **-14** | **-9** | **-7** | **-6** |
| **Bx**(±1nΤ) | **-11** | **-24** | **-32** | **-40** | **-49** | **-53** | **-58** | **-59** |
| **Bz**(±1nΤ) | **48** | **45** | **47** | **45** | **41** | **42** | **38** | **38** |
| **B**(±1nΤ) | **54** | **56** | **60** | **62** | **65** | **68** | **70** | **70** |
| **θΒο** | **115±**1 | **-66±**1 | **-72±**1 | **-74±**1 | **-78±**1 | **-83±**1 | **-84±**1 | **-85±**1 |
| **φΒο** | **103**1 | **118±**1 | **124±**1 | **132±**1 | **140±**1 | **142±**1 | **147±**1 | **147±**1 |
| **2** | **Βy** (±1nΤ) | **-20** | **-21** | **-18** | **-15** | **-12** | **-6** | **-7** | **-1** |
| **Bx**(±1nΤ) | **-12** | **-20** | **-35** | **-40** | **-46** | **-53** | **-53** | **-57** |
| **Bz**(±1nΤ) | **56** | **53** | **47** | **50** | **47** | **43** | **43** | **39** |
| **B**(±1nΤ) | **61** | **60** | **61** | **66** | **67** | **70** | **69** | **69** |
| **θΒο** | **-71±**1 | **-70±**1 | **-73±**1 | **-77±**1 | **-80±**1 | **-85±**1 | **-84±**1 | **-89±**1 |
| **φΒο** | **102±**1 | **111±**1 | **127±**1 | **129±**1 | **134±**1 | **141±**1 | **141±**1 | **146±**1 |
| **3** | **Βy** (±1nΤ) | **-22** | **-19** | **-15** | **-14** | **-10** | **-11** | **-3** |  |
| **Bx**(±1nΤ) | **-17** | **-24** | **-31** | **-45** | **-47** | **-48** | **-55** |
| **Bz**(±1nΤ) | **47** | **52** | **55** | **46** | **49** | **46** | **42** |
| **B**(±1nΤ) | **54** | **60** | **65** | **66** | **69** | **67** | **69** |
| **θΒο** | **-67±**1 | **-72±**1 | **-77±**1 | **-78±**1 | **-82±**1 | **-81±**1 | **-88±**1 |
| **φΒο** | **110±**1 | **115±**1 | **119±**1 | **134±**1 | **134±**1 | **136±**1 | **143±**1 |
| **4** | **Βy** (±1nΤ) | **-26** | **-23** | **-20** | **-17** | **-16** | **-13** | **-11** |  |
| **Bx**(±1nΤ) | **-13** | **-23** | **-32** | **-43** | **-46** | **-54** | **-57** |
| **Bz**(±1nΤ) | **40** | **44** | **45** | **44** | **40** | **40** | **42** |
| **B**(±1nΤ) | **49** | **55** | **59** | **64** | **63** | **68** | **72** |
| **θΒο** | **-59±**2 | **-65±**1 | **-70±**1 | **-75±**1 | **-76±**1 | **-79±**1 | **-81±**1 |
| **φΒο** | **108±**1 | **118±**1 | **125±**1 | **134±**1 | **139±**1 | **143±**1 | **144±**1 |
| **5** | **Βy** (±1nΤ) |  | **-27** | **-23** | **-22** | **-18** | **-15** | **-14** |  |
| **Bx**(±1nΤ) | **-21** | **-36** | **-37** | **-48** | **-50** | **-55** |
| **Bz**(±1nΤ) | **33** | **36** | **34** | **34** | **35** | **33** |
| **B**(±1nΤ) | **47** | **56** | **55** | **61** | **63** | **66** |
| **θΒο** | **-56±**2 | **-66±**1 | **-67±**1 | **-73±**1 | **-76±**1 | **-78±**1 |
| **φΒο** | **122±1** | **135±**1 | **137±**1 | **145±**1 | **145±**1 | **149±**1 |

**Table 14a.** *Indicative sensor readings with the x-sensor oriented in the grooves’ direction on the body fragments of* ***vase 5.***


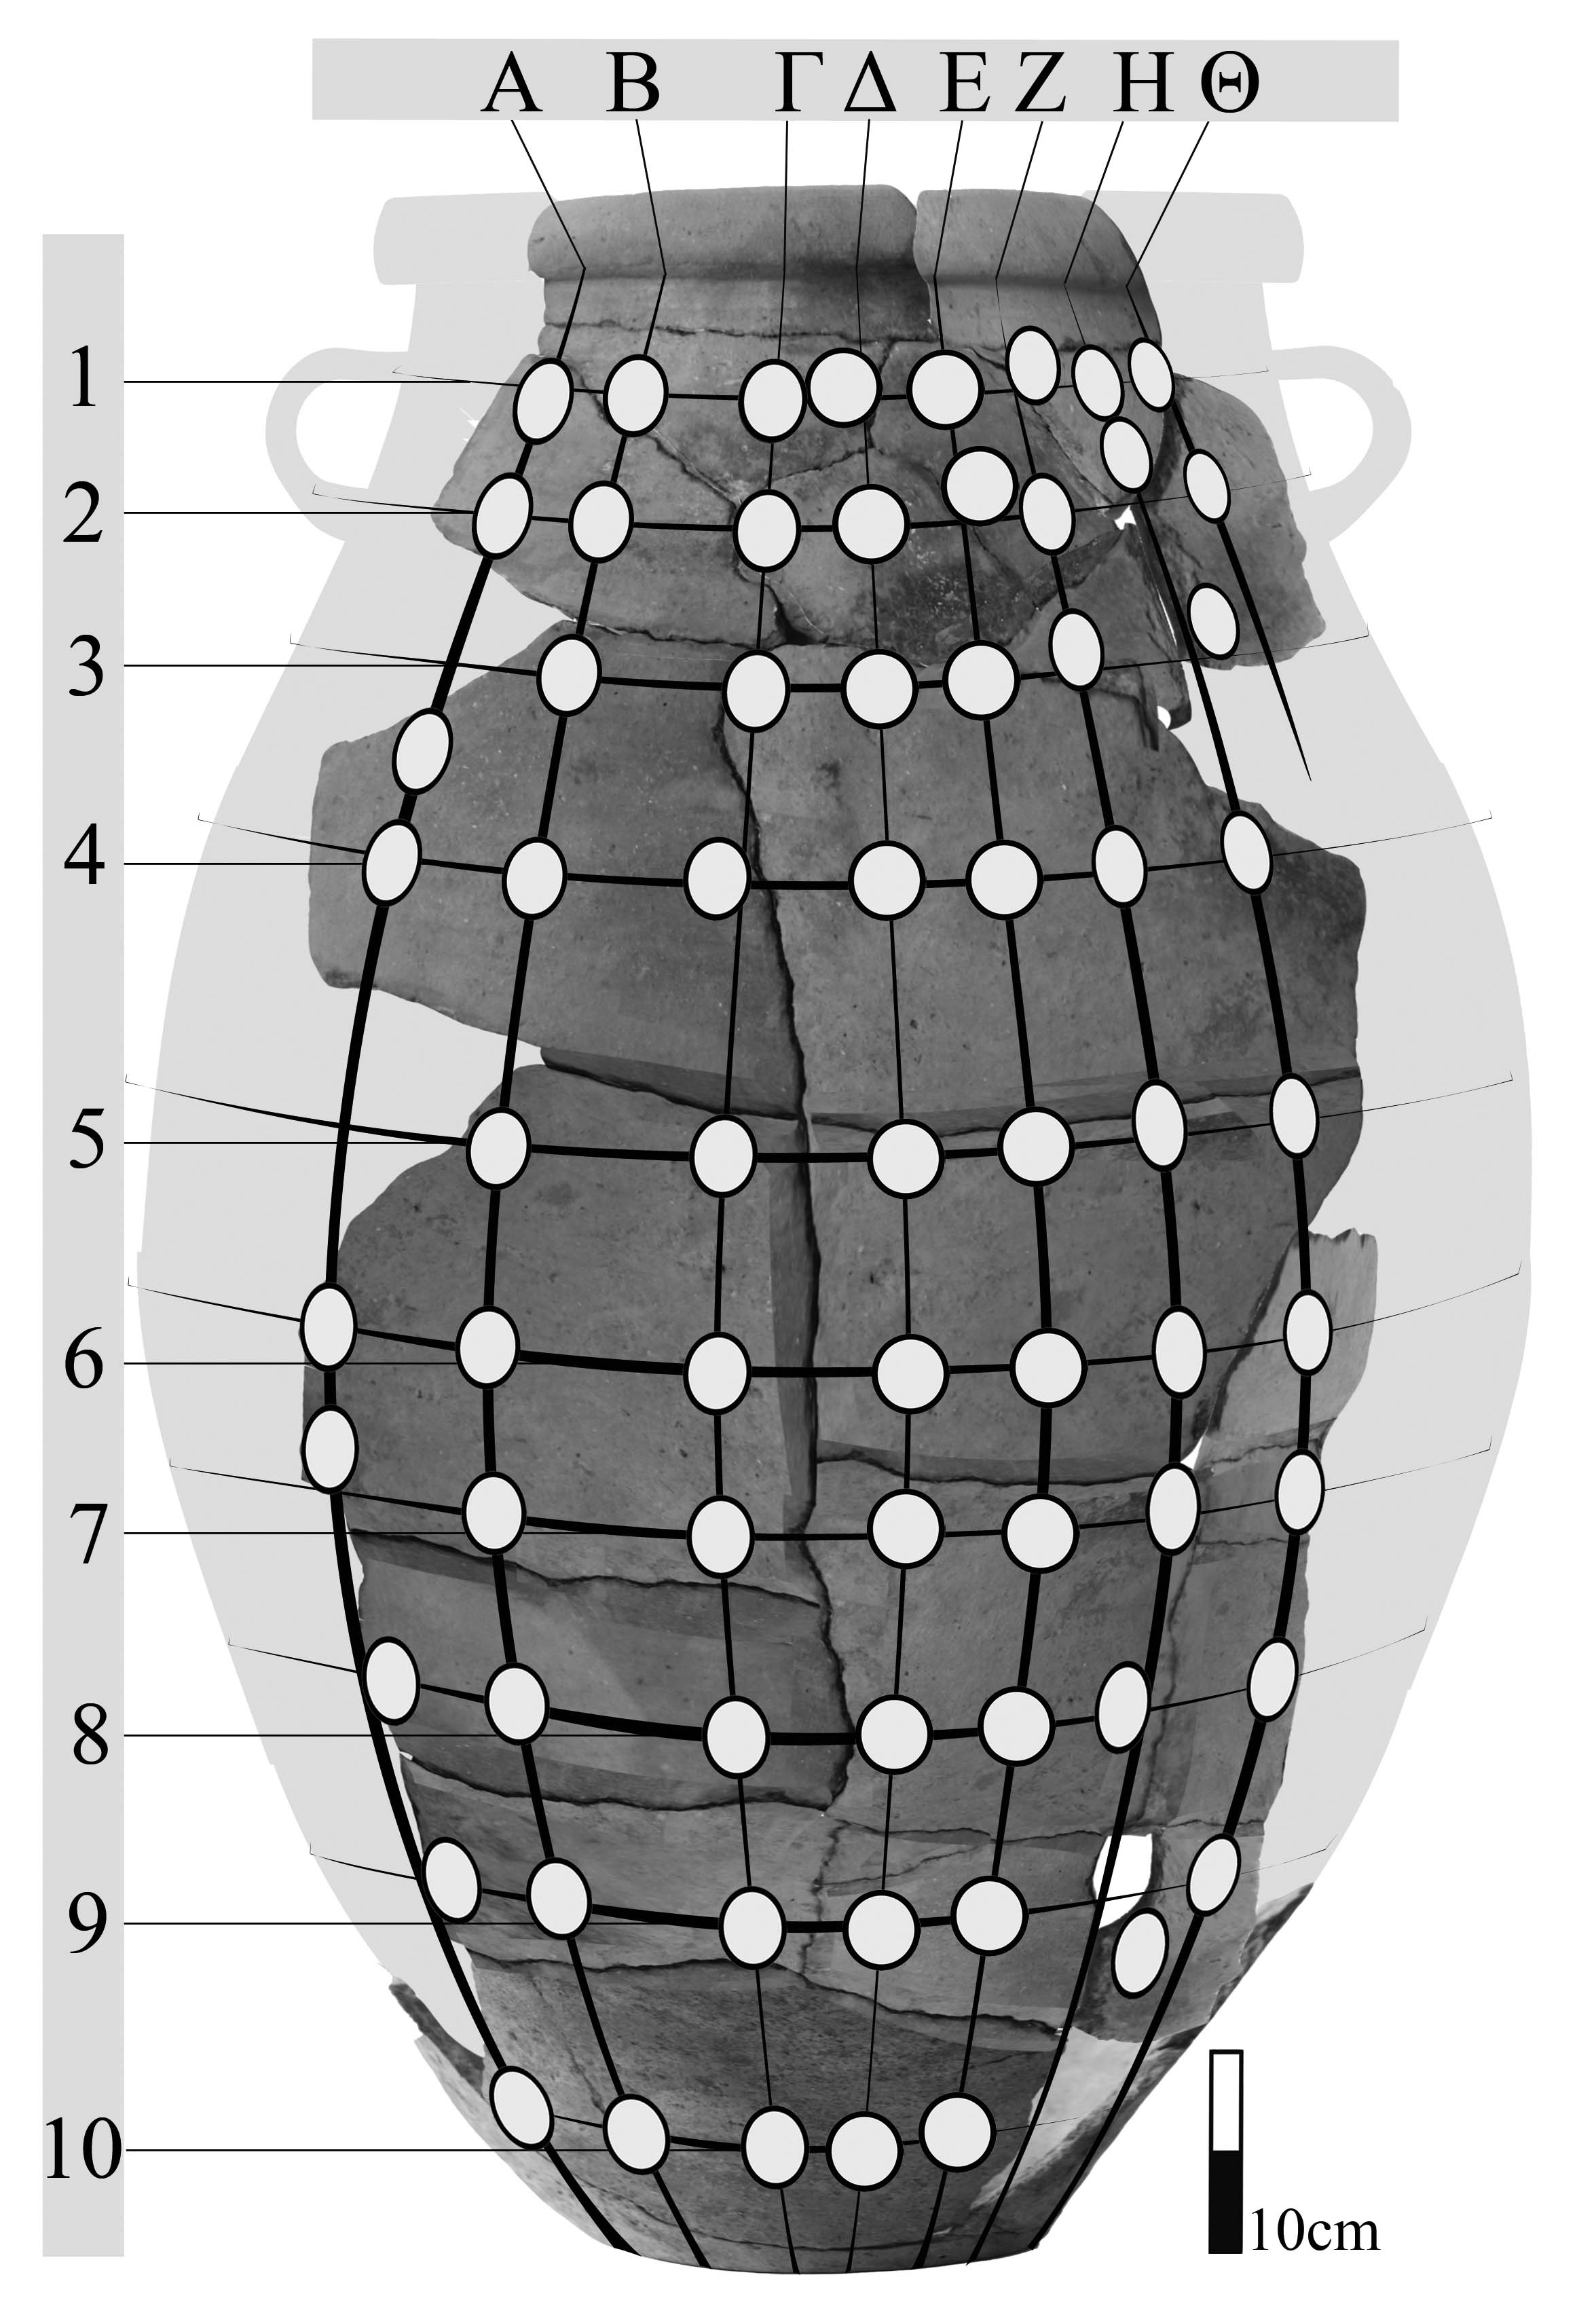


| **Vase 5** | |
| --- | --- |
| 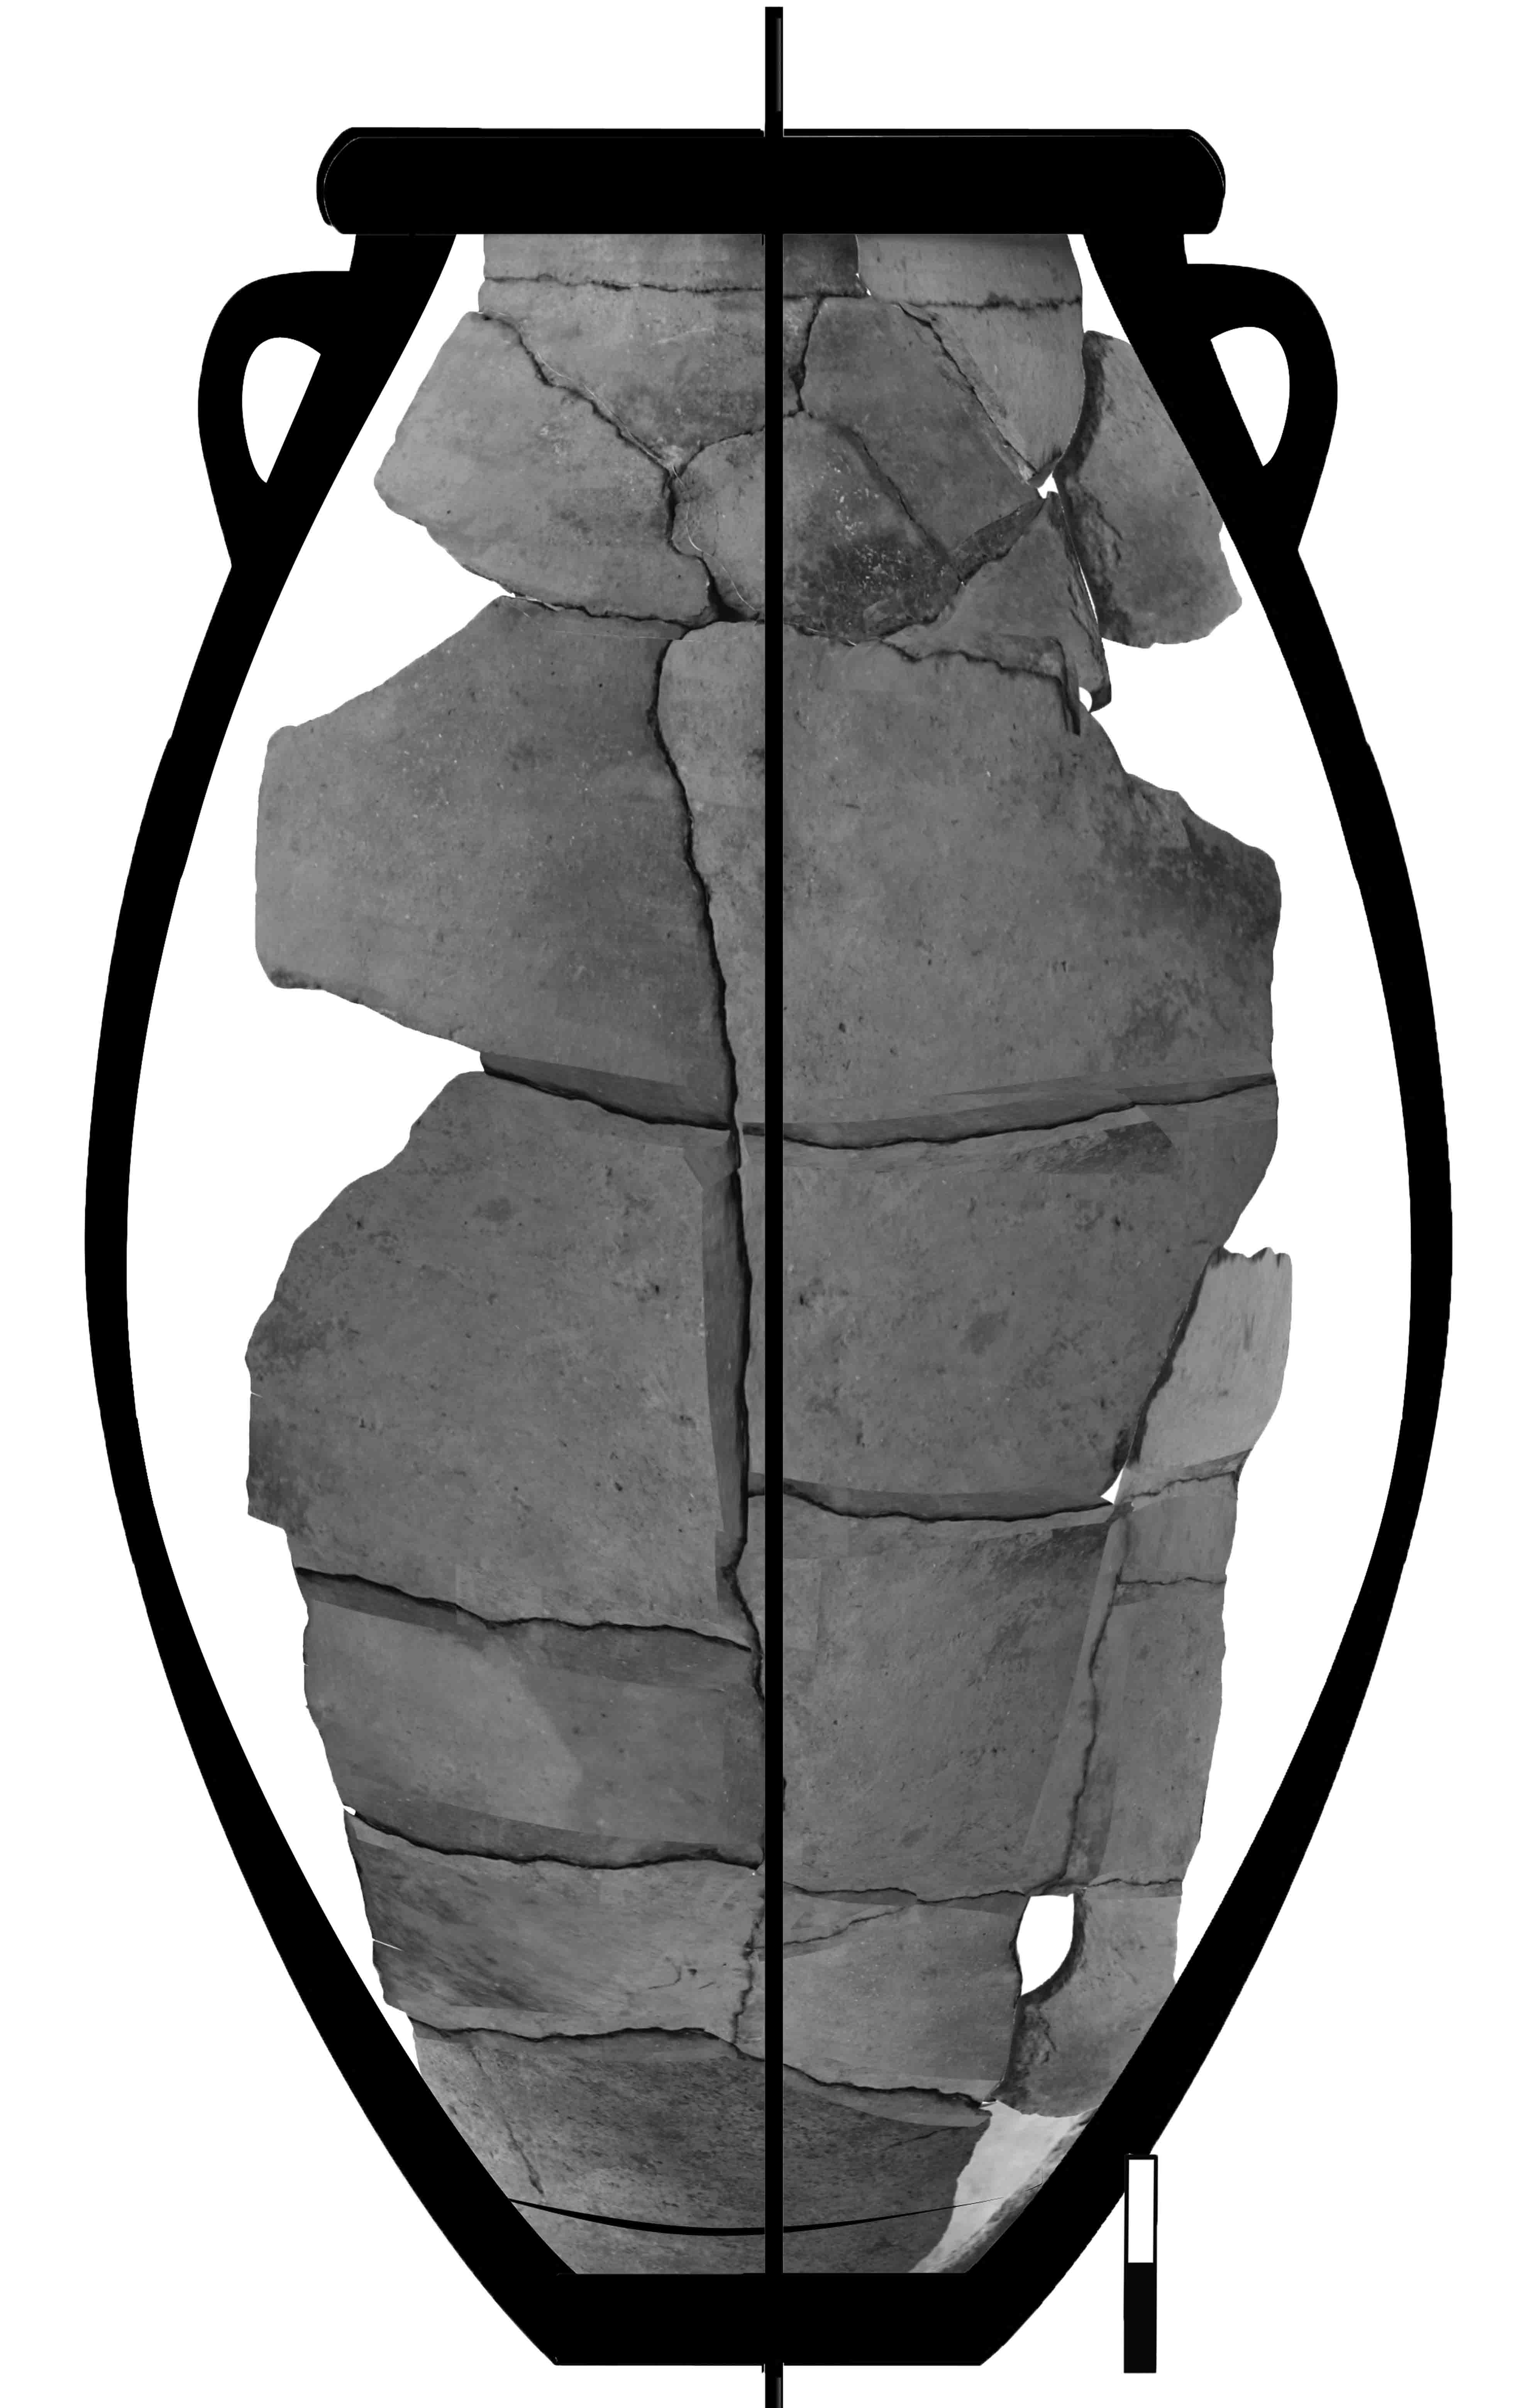 | |
|
|
| **A** | **Β** | **Γ** | **Δ** | **Ε** | **Ζ** | **Η** | **Θ** |
| **6** | **Βy** (±1nΤ) | **-28** | **-28** | **-26** | **-24** | **-20** | **-20** | **-17** |  |
| **Bx**(±1nΤ) | **-10** | **-16** | **-25** | **-40** | **-45** | **-48** | **-53** |
| **Bz**(±1nΤ) | **16** | **14** | **24** | **19** | **25** | **27** | **25** |
| **B**(±1nΤ) | **33** | **35** | **43** | **50** | **55** | **58** | **61** |
| **θΒο** | **-34±**4 | **-38±**3 | **-54±**2 | **-62±**1 | **-69±**1 | **-70±**1 | **-74±**1 |
| **φΒο** | **122±**3 | **139±**3 | **136±**2 | **155±**1 | **151±**1 | **151±**1 | **155±**1 |
| **7** | **Βy** (±1nΤ) | **-30** | **-29** | **-27** | **-26** | **-22** | **-19** | **-19** |  |
| **Bx**(±1nΤ) | **-9** | **-20** | **-24** | **-35** | **-47** | **-48** | **-47** |
| **Bz**(±1nΤ) | **11** | **13** | **12** | **16** | **22** | **20** | **22** |
| **B**(±1nΤ) | **33** | **37** | **38** | **46** | **56** | **55** | **55** |
| **θΒο** | **-26±**5 | **-40±**3 | **-45±**3 | **-56±**2 | **-67±**1 | **-70±**1 | **-70±**1 |
| **φΒο** | **129±**4 | **147±**2 | **153±**2 | **155±**1 | **155±**1 | **157±**1 | **155±**1 |
| **8** | **Βy** (±1nΤ) | **-31** | **-31** | **-29** | **-25** | **-23** | **-21** | **-20** |  |
| **Bx**(±1nΤ) | **-8** | **-21** | **-30** | **-39** | **-45** | **-51** | **-53** |
| **Bz**(±1nΤ) | **5** | **4** | **4** | **13** | **12** | **14** | **18** |
| **B**(±1nΤ) | **32** | **37** | **42** | **48** | **52** | **57** | **59** |
| **θΒο** | **-17±**8 | **-35±**3 | **-47±**2 | **-59±**2 | **-64±**1 | **-69±**1 | **-71±**1 |
| **φΒο** | **148±**6 | **169±**3 | **172±**2 | **162±**1 | **165±**1 | **165±**1 | **161±**1 |
| **9** | **Βy** (±1nΤ) | **-32** | **-29** | **-27** | **-27** | **-25** | **-23** | **-21** |  |
| **Bx**(±1nΤ) | **-11** | **-23** | **-33** | **-38** | **-44** | **-52** | **-56** |
| **Bz**(±1nΤ) | **-10** | **-5** | **-4** | **0** | **2** | **5** | **9** |
| **B**(±1nΤ) | **35** | **37** | **43** | **46** | **50** | **57** | **60** |
| **θΒο** | **-25±**5 | **-39±**3 | **-51±**2 | **-55±**2 | **-61±**1 | **-67±**1 | **-70±**1 |
| **φΒο** | **222±**4 | **192±**2 | **187±**2 | **180±**2 | **177±**1 | **175±**1 | **171±**1 |
| **10** | **Βy** (±1nΤ) | **-32** | **-31** | **-30** | **-28** | **-26** |  |  |  |
| **Bx**(±1nΤ) | **-7** | **-21** | **-34** | **-38** | **-45** |
| **Bz**(±1nΤ) | **-14** | **-12** | **-8** | **-11** | **-6** |
| **B**(±1nΤ) | **35** | **39** | **46** | **48** | **52** |
| **θΒο** | **-26±**5 | **-38±**3 | **-50±**2 | **-55±**2 | **-61±1** |
| **φΒο** | **243±**4 | **210±**2 | **193±**2 | **196±**1 | **188±1** |

**Table 14b.** *Indicative sensor readings with the x-sensor oriented in the grooves’ direction on the body fragments of* ***vase 5.***


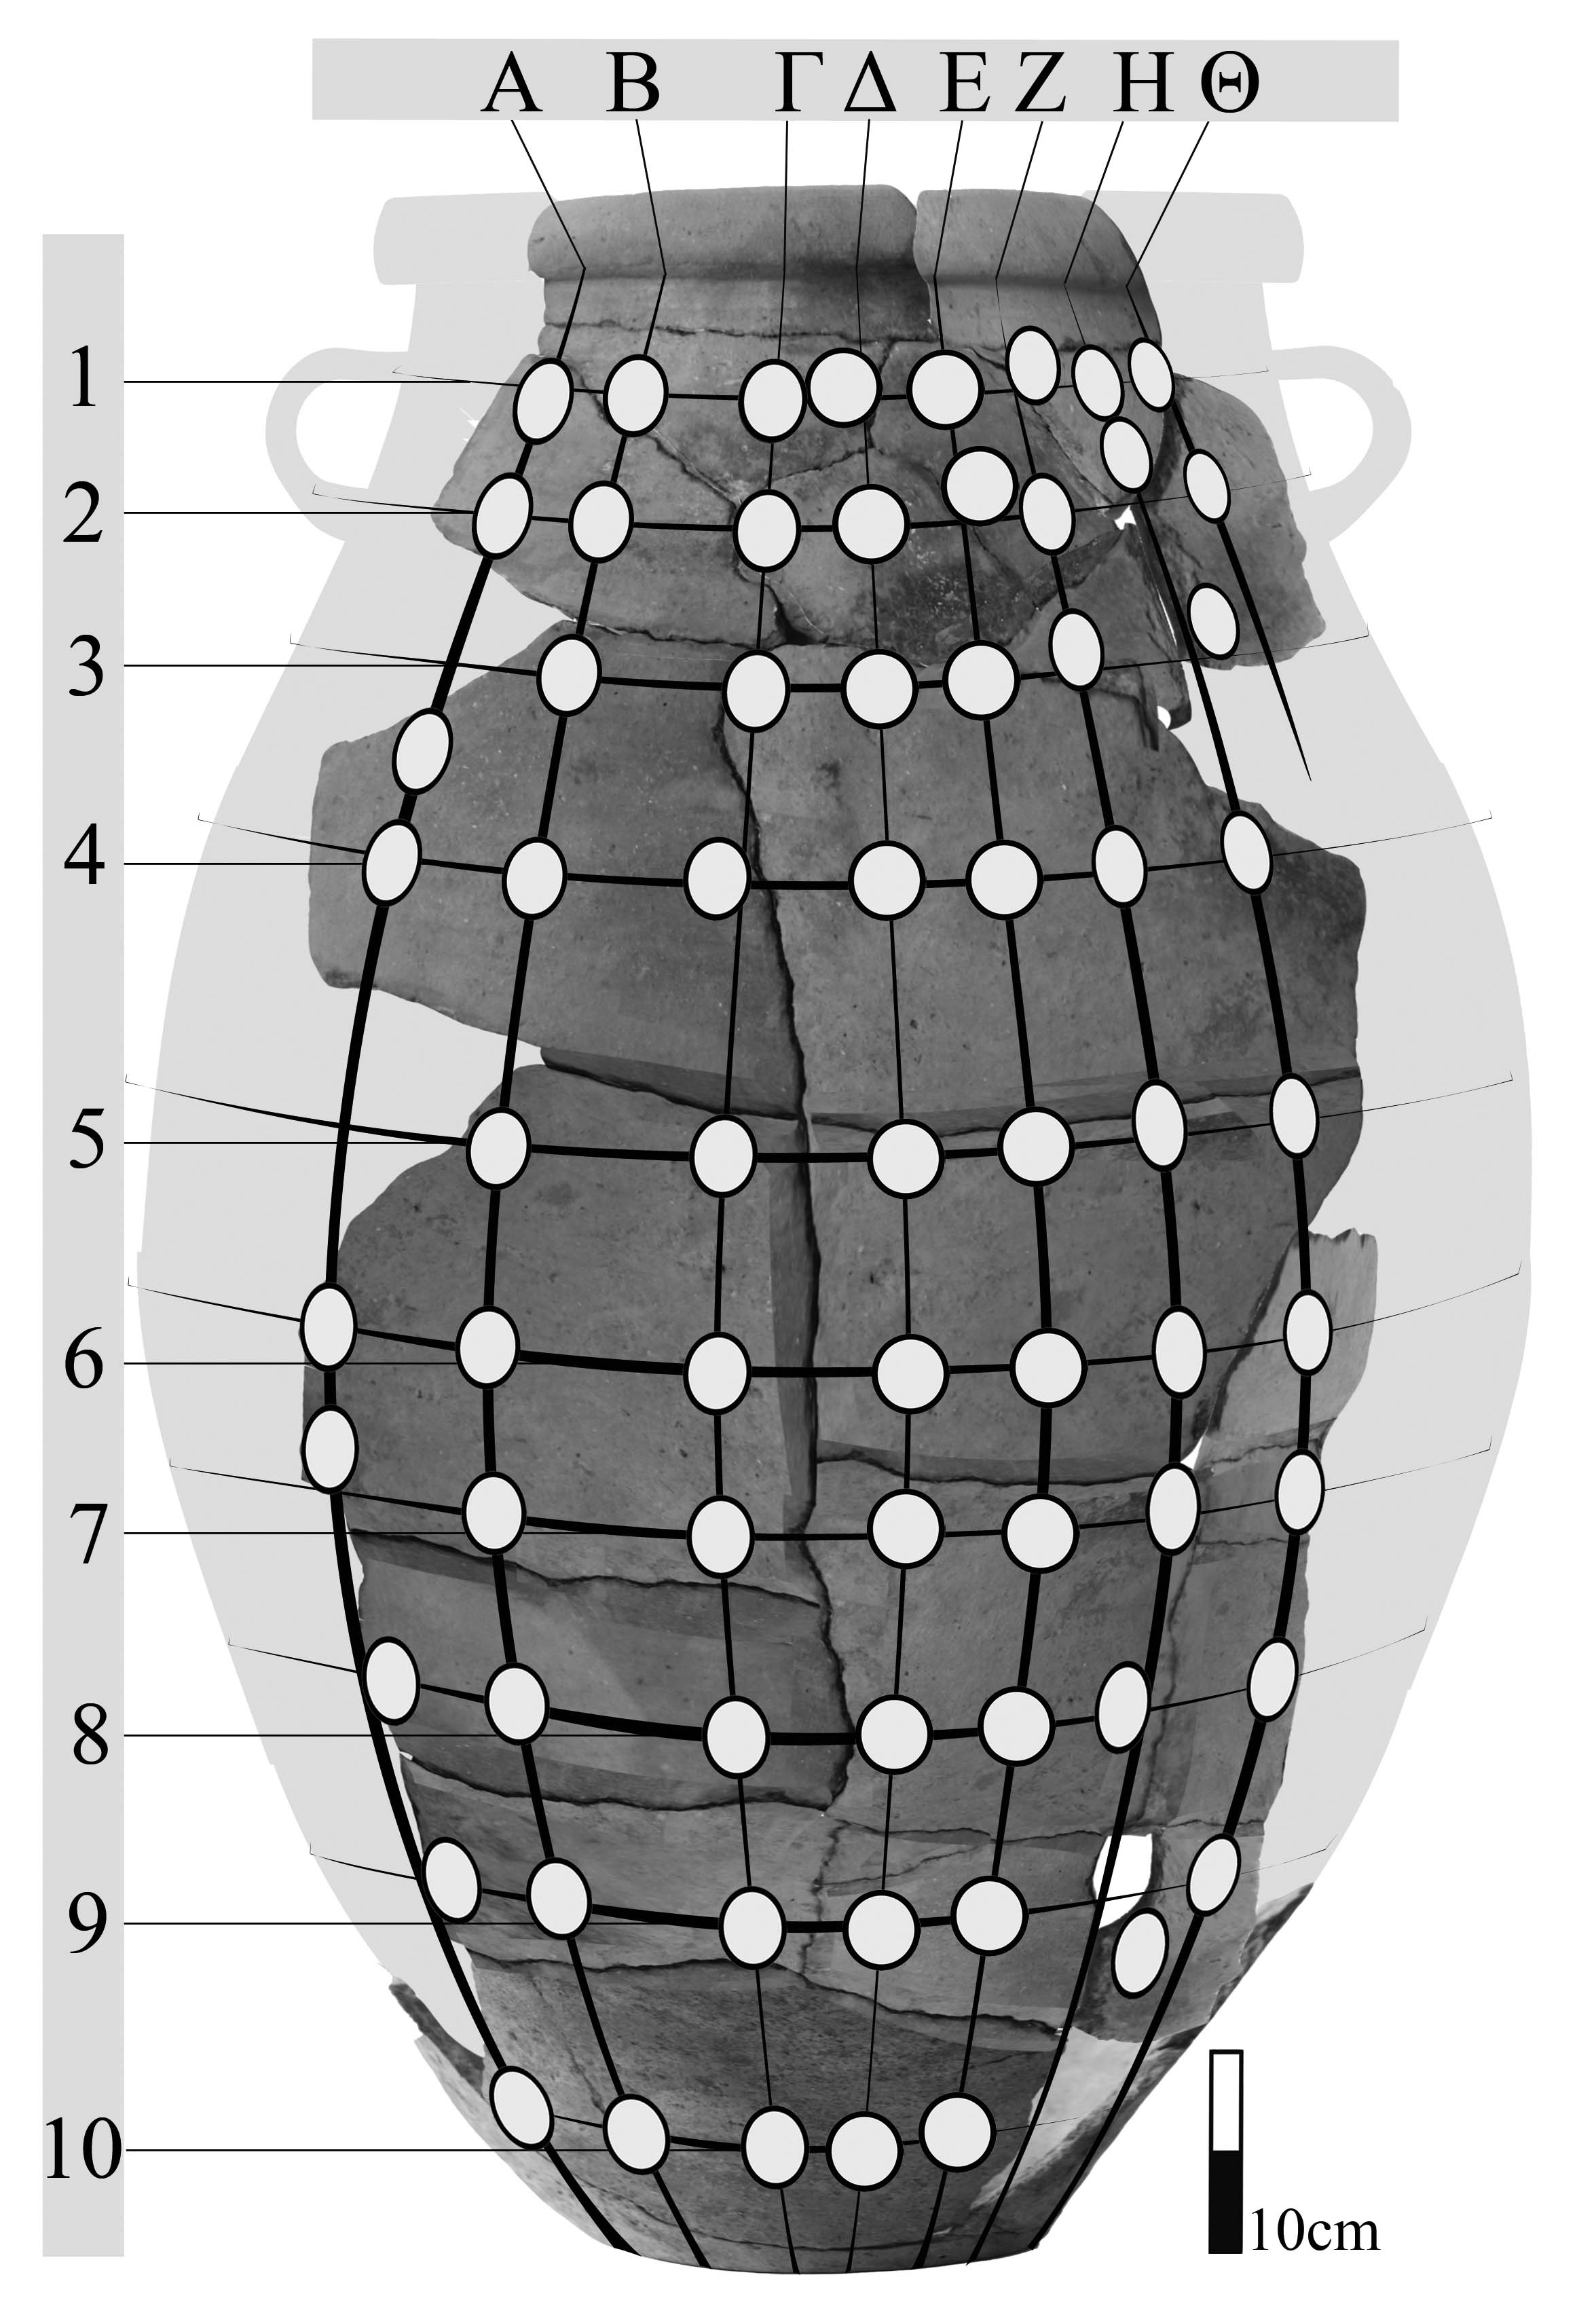

Supplement: Supplementary file 1 [file supplementary]
